# Supplementary material for: Enantioselective synthesis of tertiary boronic esters through catalytic asymmetric reversed hydroboration
Source: PubMed Central journal article supplement (PMC8213697; doi:10.1038/s41467-021-24012-z), 2021-06-18
Supplement: 41467_2021_24012_MOESM1_ESM.pdf [file 41467_2021_24012_MOESM1_ESM.pdf]

## *Supplementary Information*

### **Enantioselective Synthesis of Tertiary Boronic Esters Through Catalytic Asymmetric Reversed Hydroboration**

Tao-Tao Gao, Hou-Xiang Lu, Peng-Chao Gao and Bi-Jie Li\*

Center of Basic Molecular Science (CBMS), Department of Chemistry, Tsinghua University

#### Table of Contents

|                                                                                         |      |
|-----------------------------------------------------------------------------------------|------|
| Supplementary Methods .....                                                             | S2   |
| General Procedure for the Synthesis of $\alpha,\beta$ -Unsaturated Carboxylic Acid..... | S2   |
| General Procedure for the Synthesis of $\alpha,\beta$ -Unsaturated Amide .....          | S3   |
| Characterization of Substrates .....                                                    | S6   |
| Characterization of Products.....                                                       | S21  |
| Synthetic Transformation of Boration Products .....                                     | S54  |
| Substrates and Products for Control Experiments .....                                   | S59  |
| General Information for Computation .....                                               | S62  |
| Copies of NMR Spectra .....                                                             | S84  |
| Supplementary References.....                                                           | S173 |

## Supplementary Methods

Unless otherwise noted, all reactions were assembled on a Schlenk vacuum line or in a glovebox using oven-dried glassware and were stirred with Teflon-coated magnetic stirring bars. All the ligands were purchased from Strem Chemicals and were used as received. [Rh(cod)<sub>2</sub>OTf] was prepared according to literature methods.<sup>1</sup> Pinacolborane was purchased from Energy Chemical and was used as received. 1,2-Difluorobenzene was purchased from Energy Chemical and was distilled over calcium hydride. Tetrahydrofuran (THF) and acetonitrile (CH<sub>3</sub>CN) were degassed by purging with nitrogen and then dried with a solvent purification system containing activated alumina. All other solvents and reagents were used as received. All work-up and purification procedures were carried out with reagent grade solvents in air. Reaction temperatures above 23 °C refer to temperatures of an aluminum heating block or a silicon oil bath, which were controlled by an electronic temperature modulator from IKA. NMR spectra were acquired on NMR spectrometer with 400 MHz for <sup>1</sup>H NMR and 101 MHz for <sup>13</sup>C NMR at the NMR facility at Center of Basic Molecular Science (CBMS). Chemical shifts (δ) are reported in ppm relative to the residual solvent signal. Data for <sup>1</sup>H NMR spectra are reported as follows: chemical shift (multiplicity, coupling constants, number of hydrogens). Abbreviations are as follows: s (singlet), d (doublet), t (triplet), q (quartet), m (multiplet), br (broad). Infrared (IR) spectra were recorded on a Bruker FT-IR alpha (ATR mode) spectrophotometer. High-resolution mass spectral data was performed on a Thermo Scientific Q Exactive (positive mode) at the Mass Spectrometry Facility, CBMS. Enantiomer excess (ee) values were determined by analytical liquid chromatography (HPLC) analysis on a Shimadzu chromatograph (Daicel chiral columns Chiralpak IA, IC, ID, IE, AD, OD, AS, OJ (4.6 x 250 mm)). Specific rotations were measured on a Jasco P-2000 Polarimeter.

### General procedure for the synthesis of (*E*)-α, β-unsaturated carboxylic acid

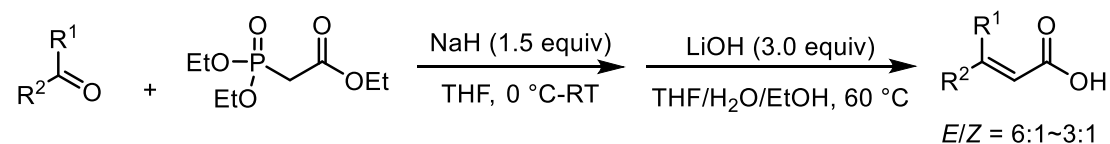

To a 250 mL flask with a Teflon-coated magnetic stir bar was added NaH (24.0 mmol, 1.2 equiv.) and THF (60 mL). Then ethyldiethylphosphonoacetate (24.0 mmol, 1.2 equiv.) was added dropwise at 0 °C. After stirring at 0 °C for 1 hour, the ketone (20.0 mmol, 1.0 equiv.) was added dropwise. After stirring 5 hours at room temperature, the reaction was cooled down and quenched with saturated NH<sub>4</sub>Cl solution and extracted with EtOAc (3 x 50 mL). The combined organic layer was washed with water (20 mL), brine (20 mL) and dried over Na<sub>2</sub>SO<sub>4</sub>. After removal of the solvent, the residue was purified by column chromatography on silica gel with EtOAc/hexanes as eluent, affording the (*E*)- $\alpha,\beta$ -unsaturated ester.

To the solution of (*E*)- $\alpha,\beta$ -unsaturated ester (10.0 mmol, 1.0 equiv.) in THF (20 mL), H<sub>2</sub>O (20 mL), EtOH (20 mL), and LiOH (30 mmol, 3.0 equiv.) were added at room temperature. The reaction mixture was stirred at 60 °C for 5 hours and monitored by TLC. After completion of the reaction, the reaction mixture was cooled to 0 °C and was acidified until pH=3 using 1 M HCl solution. EtOAc (50 mL) was added, and the mixture was washed with water (20 mL), brine (20 mL) and dried over Na<sub>2</sub>SO<sub>4</sub>. The concentrated reaction mixture was used directly in next step without further purification.

### **General procedure for the synthesis of $\alpha,\beta$ -unsaturated amide**

To a 100 mL round-bottom flask with a Teflon-coated magnetic stir bar were added  $\alpha,\beta$ -unsaturated carboxylic acid (5.0 mmol, 1.0 equiv.), 1-ethyl-3-(3-(dimethylamino)propyl)-carbodiimide hydrochloride (EDCI) (7.5 mmol, 1.5 equiv.), *N,N*-dimethylaminopyridine (0.50 mmol, 10 mol%) , the amine (6.0 mmol, 1.2 equiv.) and dichloromethane (30.0 mL). The reaction mixture was stirred at room temperature for 12 h. Dichloromethane (50 mL) was added, and the mixture was washed with water (20 mL), brine (20 mL) and dried over Na<sub>2</sub>SO<sub>4</sub>. After removal of the solvent, the residue was purified by column chromatography on silica gel with EtOAc/hexanes mixture as eluent.

Synthesis of  $\alpha,\beta$ -unsaturated amide **1ab**, **1ac**, **1ae**, **10** and **11**: To a 100 mL round-bottom flask with a Teflon-coated magnetic stir bar were added  $\alpha,\beta$ -unsaturated carboxylic acid (5.0 mmol, 1.0 equiv.), 2-(7-azabenzotriazol-1-yl)-*N,N,N',N'*-

tetramethyluronium hexafluorophosphate (HATU) (8.0 mmol, 1.6 equiv.), 2,4,6-trimethylpyridine (10.0 mmol, 2.0 equiv.), the amine (6.0 mmol, 1.2 equiv.) and dichloromethane (30.0 mL). The reaction mixture was stirred at room temperature for 12 h. Dichloromethane (50 mL) was added, and the mixture was washed with water (20 mL), brine (20 mL) and dried over Na<sub>2</sub>SO<sub>4</sub>. After removal of the solvent, the residue was purified by column chromatography on silica gel with EtOAc/hexanes mixture as eluent.

According to the general procedure, the hydroboration using various additives was analyzed. It seems only weakly protic solvent additives have the beneficial effect. Our proposal is that the alcohol coordinates to the catalytic intermediates through hydrogen bonding to facilitate the catalytic cycle, but further evidence is necessary.

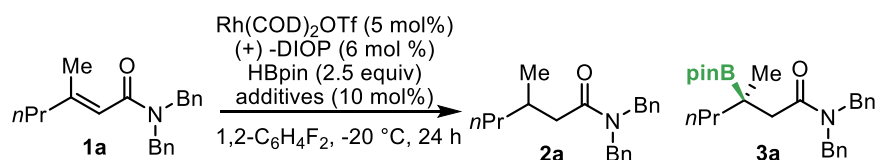

| Entry | additives               | 2a (yield%) | 3a (yield%) | 3a (ee%) |
|-------|-------------------------|-------------|-------------|----------|
| 1     | -                       | <5          | 76          | 96       |
| 2     | <b>THF</b>              | 16          | 57          | 93       |
| 3     | <b>Toluene</b>          | 13          | 18          | 92       |
| 4     | <b>DCM</b>              | 7           | 9           | 91       |
| 5     | <b>CHCl<sub>3</sub></b> | 12          | <5          | -        |
| 6     | <b>MeOH</b>             | <5          | 90          | 96       |
| 7     | <b>TFEA</b>             | <5          | 92          | 95       |
| 8     | <b>Phenol</b>           | <5          | 70          | 96       |

Reaction performed on 0.10 mmol scale. Yields were determined by GC using *n*-dodecane as an internal standard.

### Supplementary Figure 1. Additives in the reversed hydroboration

Catalytic hydroboration of *Z*-amide was also tested. However, isomerization of the *Z*-isomer to *E*-isomer occurred at a rate comparable to the hydroboration. Thus, only moderate ee was obtained for *Z*-isomer. The reaction of a mixture of *E/Z* alkenes also provided low ee because of the isomerization.

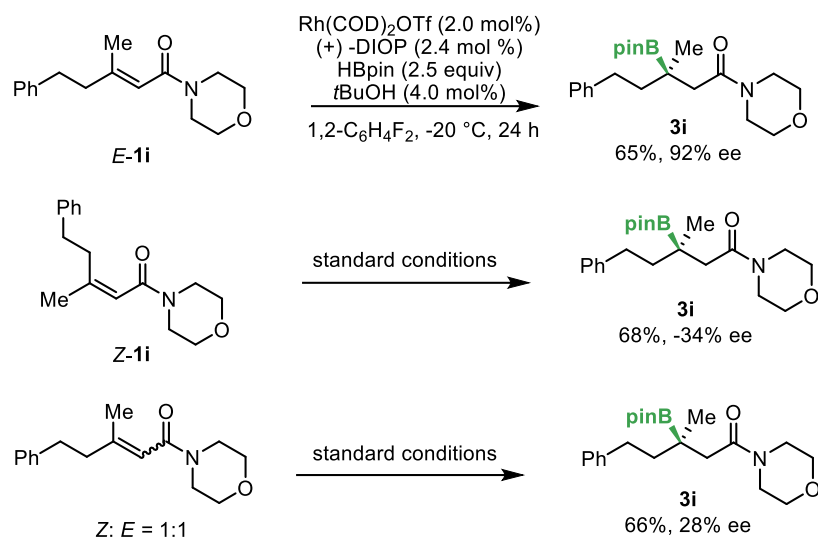

**Supplementary Figure 2.** Hydroboration of (*Z*)-alkene and (*Z*), (*E*)-alkene mixture

## Characterization of Substrates

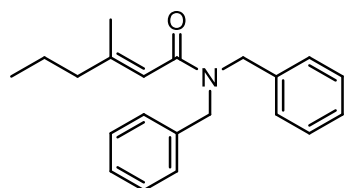

**amide 1a:** colorless oil. TLC analysis (hexanes/EtOAc 11:1)  $R_f = 0.21$ ;  $^1\text{H NMR}$  (400 MHz,  $\text{CDCl}_3$ )  $\delta$  7.42 – 7.09 (m, 10H), 5.92 (q,  $J = 1.3$  Hz, 1H), 4.59 (s, 2H), 4.45 (s, 2H), 2.05 (td,  $J = 7.4, 1.2$  Hz, 2H), 2.01 (s, 3H), 1.45 (h,  $J = 7.4$  Hz, 2H), 0.85 (t,  $J = 7.4$  Hz, 3H).  $^{13}\text{C NMR}$  (101 MHz,  $\text{CDCl}_3$ )  $\delta$  169.1, 151.6, 137.7, 137.0, 129.0, 128.7, 128.5, 127.7, 127.4, 127.0, 117.4, 50.5, 47.3, 42.2, 20.8, 18.8, 13.8. **ESI-HR** calcd for  $\text{C}_{21}\text{H}_{26}\text{NO}^+$  ( $[\text{M}+\text{H}]^+$ ) 308.2009, found 308.2003. **IR**  $\nu$  ( $\text{cm}^{-1}$ ) 2958, 2926, 2863, 1625, 697.

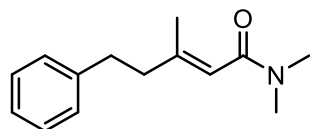

**amide 1b:** colorless oil. TLC analysis (hexanes/EtOAc 1:2)  $R_f = 0.42$ ;  $^1\text{H NMR}$  (400 MHz,  $\text{CDCl}_3$ )  $\delta$  7.34 – 7.13 (m, 5H), 5.71 (t,  $J = 1.3$  Hz, 1H), 2.94 (s, 3H), 2.79 (d,  $J = 7.4$  Hz, 5H), 2.42 (td,  $J = 7.7, 1.2$  Hz, 2H), 1.93 (d,  $J = 1.3$  Hz, 3H).  $^{13}\text{C NMR}$  (101 MHz,  $\text{CDCl}_3$ )  $\delta$  168.7, 147.5, 141.5, 128.5, 126.1, 118.9, 41.4, 37.6, 34.7, 33.9, 18.5. **ESI-HR** calcd for  $\text{C}_{14}\text{H}_{20}\text{NO}^+$  ( $[\text{M}+\text{H}]^+$ ) 218.1539, found 218.1537. **IR**  $\nu$  ( $\text{cm}^{-1}$ ) 2923, 1651, 1621, 744.

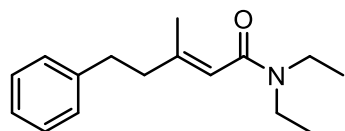

**amide 1c:** colorless oil. TLC analysis (hexanes/EtOAc 2:1)  $R_f = 0.34$ ;  $^1\text{H NMR}$  (400 MHz,  $\text{CDCl}_3$ )  $\delta$  7.34 – 7.13 (m, 5H), 5.71 (q,  $J = 1.3$  Hz, 1H), 3.38 (q,  $J = 7.1$  Hz, 2H), 3.09 (q,  $J = 7.2$  Hz, 2H), 2.81 (dd,  $J = 8.7, 6.8$  Hz, 2H), 2.48 – 2.37 (m, 2H), 1.94 (d,  $J = 1.3$  Hz, 3H), 1.12 (t,  $J = 7.1$  Hz, 3H), 1.00 (t,  $J = 7.1$  Hz, 3H).  $^{13}\text{C NMR}$  (101 MHz,  $\text{CDCl}_3$ )  $\delta$  167.9, 147.1, 141.5, 128.5, 128.5, 126.1, 119.1, 42.4, 41.2, 39.4, 33.8, 18.5, 14.3, 13.3.

**ESI-HR** calcd for  $C_{16}H_{24}NO^+$  ( $[M+H]^+$ ) 246.1852, found 246.1849. **IR**  $\nu$  ( $cm^{-1}$ ) 2975, 2934, 1650, 1611, 726.

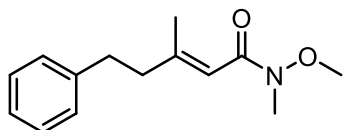

**amide 1d:** colorless oil. TLC analysis (hexanes/EtOAc 2:1)  $R_f$  = 0.46;  **$^1H$  NMR** (400 MHz,  $CDCl_3$ )  $\delta$  7.30 – 7.22 (m, 2H), 7.16 (d,  $J$  = 2.0 Hz, 3H), 6.05 (s, 1H), 3.52 (s, 3H), 3.15 (s, 3H), 2.80 (dd,  $J$  = 9.0, 6.6 Hz, 2H), 2.46 (dd,  $J$  = 9.0, 6.7 Hz, 2H), 2.25 – 2.13 (m, 3H).  **$^{13}C$  NMR** (101 MHz,  $CDCl_3$ )  $\delta$  168.0, 155.2, 141.3, 128.5, 128.5, 126.1, 114.7, 61.4, 42.8, 34.0, 32.3, 18.8. **ESI-HR** calcd for  $C_{14}H_{20}NO_2^+$  ( $[M+H]^+$ ) 234.1489, found 234.1485. **IR**  $\nu$  ( $cm^{-1}$ ) 2935, 1653, 1637, 1495, 1368, 698.

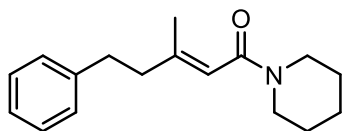

**amide 1e:** colorless oil. TLC analysis (hexanes/EtOAc 1:1)  $R_f$  = 0.45;  **$^1H$  NMR** (400 MHz,  $CDCl_3$ )  $\delta$  7.27 (dd,  $J$  = 8.6, 6.5 Hz, 2H), 7.22 – 7.11 (m, 3H), 5.65 (q,  $J$  = 1.3 Hz, 1H), 3.53 (t,  $J$  = 5.5 Hz, 2H), 3.11 (dd,  $J$  = 6.6, 4.5 Hz, 2H), 2.80 (dd,  $J$  = 8.5, 6.8 Hz, 2H), 2.42 (td,  $J$  = 7.5, 1.1 Hz, 2H), 1.86 (d,  $J$  = 1.2 Hz, 3H), 1.63 – 1.48 (m, 4H), 1.39 (dq,  $J$  = 11.3, 5.6 Hz, 2H).  **$^{13}C$  NMR** (101 MHz,  $CDCl_3$ )  $\delta$  167.3, 145.4, 141.4, 128.5, 128.4, 126.0, 119.6, 47.2, 42.2, 40.9, 33.7, 26.7, 25.7, 24.7, 18.4. **ESI-HR** calcd for  $C_{17}H_{24}NO^+$  ( $[M+H]^+$ ) 258.1852, found 258.1849. **IR**  $\nu$  ( $cm^{-1}$ ) 2935, 1650, 1616, 731.

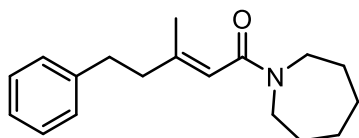

**amide 1f:** colorless oil. TLC analysis (hexanes/EtOAc 1:1)  $R_f$  = 0.50;  **$^1H$  NMR** (400 MHz,  $CDCl_3$ )  $\delta$  7.31 – 7.14 (m, 5H), 5.71 (s, 1H), 3.50 (td,  $J$  = 6.1, 1.5 Hz, 2H), 3.17 (dt,  $J$  = 6.0, 2.5 Hz, 2H), 2.80 (t,  $J$  = 7.7 Hz, 2H), 2.43 (t,  $J$  = 7.7 Hz, 2H), 1.94 (d,  $J$  = 1.4 Hz, 3H), 1.74 – 1.67 (m, 2H), 1.57 – 1.46 (m, 6H).  **$^{13}C$  NMR** (101 MHz,  $CDCl_3$ )  $\delta$  168.4,

147.0, 141.5, 128.5, 126.0, 119.4, 48.2, 45.4, 41.2, 33.8, 29.3, 27.7, 27.4, 27.0, 18.6.

**ESI-HR** calcd for  $C_{18}H_{26}NO^+$  ( $[M+H]^+$ ) 272.2009, found 272.2005. **IR**  $\nu$  ( $cm^{-1}$ ) 2927, 1650, 1607, 725, 698.

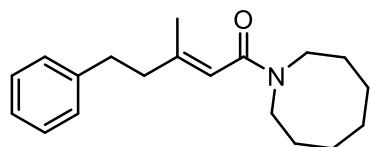

**amide 1g**: colorless oil. TLC analysis (hexanes/EtOAc 1:1)  $R_f=0.44$ ;  **$^1H$  NMR** (400 MHz,  $CDCl_3$ )  $\delta$  7.31 – 7.15 (m, 5H), 5.72 (q,  $J = 1.3$  Hz, 1H), 3.48 – 3.42 (m, 2H), 3.19 – 3.08 (m, 2H), 2.81 (dd,  $J = 8.5, 6.8$  Hz, 2H), 2.43 (ddd,  $J = 8.6, 6.8, 1.1$  Hz, 2H), 1.96 (d,  $J = 1.2$  Hz, 3H), 1.73 (td,  $J = 8.5, 7.3, 4.6$  Hz, 2H), 1.50 (d,  $J = 4.2$  Hz, 8H).  **$^{13}C$  NMR** (101 MHz,  $CDCl_3$ )  $\delta$  168.4, 147.4, 141.5, 128.5, 126.0, 119.5, 49.5, 46.8, 41.4, 33.8, 27.5, 27.1, 26.2, 25.5, 25.3, 18.6. **ESI-HR** calcd for  $C_{19}H_{28}NO^+$  ( $[M+H]^+$ ) 286.2165, found 286.2160. **IR**  $\nu$  ( $cm^{-1}$ ) 2928, 1650, 1605, 907, 726.

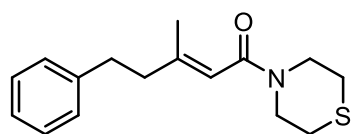

**amide 1h**: colorless oil. TLC analysis (hexanes/EtOAc 3:1)  $R_f=0.38$ ;  **$^1H$  NMR** (400 MHz,  $CDCl_3$ )  $\delta$  7.27 (dd,  $J = 8.5, 6.6$  Hz, 2H), 7.20 – 7.14 (m, 3H), 5.57 (q,  $J = 1.2$  Hz, 1H), 3.84 (q,  $J = 5.0$  Hz, 2H), 3.38 – 3.25 (m, 2H), 2.81 (t,  $J = 7.5$  Hz, 2H), 2.60 – 2.54 (m, 2H), 2.44 (td,  $J = 7.4, 1.1$  Hz, 2H), 2.41 – 2.31 (m, 2H), 1.87 (s, 3H).  **$^{13}C$  NMR** (101 MHz,  $CDCl_3$ )  $\delta$  167.5, 146.8, 141.2, 128.5, 128.5, 126.0, 119.2, 48.7, 43.7, 40.7, 33.5, 28.2, 27.5, 18.4. **ESI-HR** calcd for  $C_{16}H_{22}NOS^+$  ( $[M+H]^+$ ) 276.1417, found 276.1413. **IR**  $\nu$  ( $cm^{-1}$ ) 3024, 2910, 1622, 743, 699.

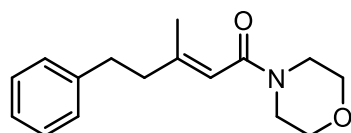

**amide 1i**: colorless oil. TLC analysis (hexanes/EtOAc 1:1)  $R_f=0.37$ ;  **$^1H$  NMR** (400 MHz,  $CDCl_3$ )  $\delta$  7.27 (dd,  $J = 8.5, 6.5$  Hz, 2H), 7.21 – 7.12 (m, 3H), 5.58 (q,  $J = 1.2$  Hz, 1H), 3.66 – 3.56 (m, 4H), 3.46 (t,  $J = 4.8$  Hz, 2H), 3.06 (t,  $J = 4.7$  Hz, 2H), 2.81 (t,  $J = 7.5$



Hz, 2H), 2.44 (td,  $J = 7.4, 1.1$  Hz, 2H), 1.90 (d,  $J = 1.3$  Hz, 3H).  $^{13}\text{C}$  NMR (101 MHz,  $\text{CDCl}_3$ )  $\delta$  167.4, 147.4, 141.3, 128.6, 128.5, 126.1, 118.7, 67.0, 46.4, 41.6, 41.0, 33.6, 18.4. **ESI-HR** calcd for  $\text{C}_{16}\text{H}_{22}\text{NO}_2^+$  ( $[\text{M}+\text{H}]^+$ ) 260.1645, found 260.1640. **IR**  $\nu$  ( $\text{cm}^{-1}$ ) 3025, 2916, 1622, 744.

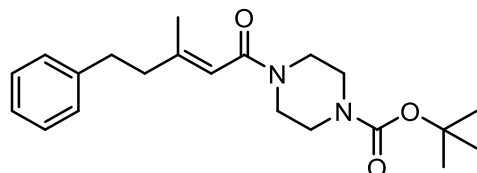

**amide 1j**: white solid. TLC analysis (hexanes/EtOAc 2:1)  $R_f = 0.32$ ;  $^1\text{H}$  NMR (400 MHz,  $\text{CDCl}_3$ )  $\delta$  7.32 – 7.27 (m, 2H), 7.21 – 7.14 (m, 3H), 5.59 (s, 1H), 3.59 – 3.51 (m, 2H), 3.37 (q,  $J = 5.4, 4.9$  Hz, 2H), 3.22 (t,  $J = 5.1$  Hz, 2H), 3.12 – 2.95 (m, 2H), 2.82 (t,  $J = 7.5$  Hz, 2H), 2.45 (td,  $J = 7.5, 1.1$  Hz, 2H), 1.88 (d,  $J = 1.2$  Hz, 3H), 1.47 (s, 9H).  $^{13}\text{C}$  NMR (101 MHz,  $\text{CDCl}_3$ )  $\delta$  167.5, 154.7, 147.4, 141.2, 128.6, 128.6, 126.2, 119.0, 80.4, 45.8, 43.8, 41.1, 41.0, 33.6, 28.5, 18.4. **ESI-HR** calcd for  $\text{C}_{21}\text{H}_{30}\text{N}_2\text{NaO}_3^+$  ( $[\text{M}+\text{Na}]^+$ ) 381.2149, found 381.2159. **IR**  $\nu$  ( $\text{cm}^{-1}$ ) 2926, 2859, 1693, 1627, 737. **M. P.** 105-108 °C.

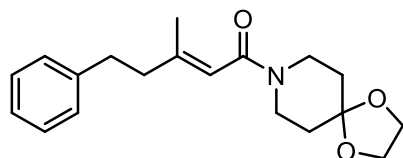

**amide 1k**: colorless oil. TLC analysis (hexanes/EtOAc 3:1)  $R_f = 0.15$ ;  $^1\text{H}$  NMR (400 MHz,  $\text{CDCl}_3$ )  $\delta$  7.28 (dd,  $J = 8.4, 6.5$  Hz, 2H), 7.18 (dd,  $J = 8.3, 6.5$  Hz, 3H), 5.64 (d,  $J = 1.9$  Hz, 1H), 3.97 (s, 4H), 3.67 (t,  $J = 5.9$  Hz, 2H), 3.19 (t,  $J = 5.8$  Hz, 2H), 2.81 (t,  $J = 7.6$  Hz, 2H), 2.44 (t,  $J = 7.6$  Hz, 2H), 1.86 (s, 3H), 1.65 (t,  $J = 5.9$  Hz, 2H), 1.51 (t,  $J = 5.9$  Hz, 2H).  $^{13}\text{C}$  NMR (101 MHz,  $\text{CDCl}_3$ )  $\delta$  167.3, 146.3, 141.3, 128.5, 128.5, 126.1, 119.3, 107.1, 64.5, 44.1, 40.9, 39.3, 35.9, 34.8, 33.6, 18.4. **ESI-HR** calcd for  $\text{C}_{19}\text{H}_{26}\text{NO}_3^+$  ( $[\text{M}+\text{H}]^+$ ) 316.1907, found 316.1903. **IR**  $\nu$  ( $\text{cm}^{-1}$ ) 2931, 1651, 1613, 726.

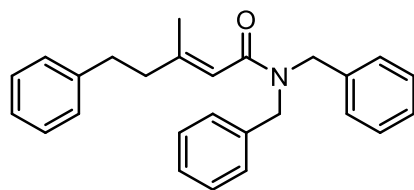

**amide 1l:** white solid. TLC analysis (hexanes/EtOAc 9:1)  $R_f$  = 0.21;  $^1\text{H NMR}$  (400 MHz,  $\text{CDCl}_3$ )  $\delta$  7.39 – 7.02 (m, 15H), 5.83 (d,  $J$  = 1.5 Hz, 1H), 4.55 (s, 2H), 4.21 (s, 2H), 2.74 (dd,  $J$  = 8.7, 6.7 Hz, 2H), 2.41 (t,  $J$  = 7.7 Hz, 2H), 2.05 (s, 3H).  $^{13}\text{C NMR}$  (101 MHz,  $\text{CDCl}_3$ )  $\delta$  169.0, 149.7, 141.3, 137.6, 136.9, 128.9, 128.7, 128.5, 128.4, 128.4, 127.6, 127.4, 127.0, 126.1, 118.5, 50.4, 47.2, 41.5, 33.8, 18.9. **ESI-HR** calcd for  $\text{C}_{26}\text{H}_{28}\text{NO}^+$  ( $[\text{M}+\text{H}]^+$ ) 370.2165, found 370.2159. **IR**  $\nu$  ( $\text{cm}^{-1}$ ) 3026, 2917, 1625, 1494, 696. **M. P.** 68-71 °C.

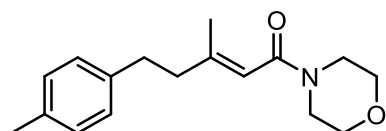

**amide 1m:** colorless oil. TLC analysis (hexanes/EtOAc 1:1)  $R_f$  = 0.28;  $^1\text{H NMR}$  (400 MHz,  $\text{CDCl}_3$ )  $\delta$  7.06 (q,  $J$  = 8.0 Hz, 4H), 5.58 (q,  $J$  = 1.4 Hz, 1H), 3.62 (dq,  $J$  = 9.9, 5.3, 4.7 Hz, 4H), 3.46 (t,  $J$  = 4.8 Hz, 2H), 3.12 – 3.03 (m, 2H), 2.77 (t,  $J$  = 7.5 Hz, 2H), 2.42 (t,  $J$  = 7.5 Hz, 2H), 2.30 (s, 3H), 1.88 (d,  $J$  = 1.3 Hz, 3H).  $^{13}\text{C NMR}$  (101 MHz,  $\text{CDCl}_3$ )  $\delta$  167.4, 147.5, 138.2, 135.5, 129.2, 128.5, 118.7, 67.0, 46.5, 41.6, 41.2, 33.2, 21.1, 18.4. **ESI-HR** calcd for  $\text{C}_{17}\text{H}_{24}\text{NO}_2^+$  ( $[\text{M}+\text{H}]^+$ ) 274.1802, found 274.1797. **IR**  $\nu$  ( $\text{cm}^{-1}$ ) 2920, 2855, 1618, 727.

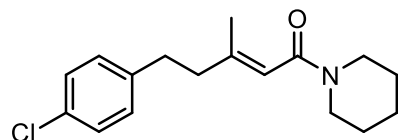

**amide 1n:** white solid. TLC analysis (hexanes/EtOAc 2:1)  $R_f$  = 0.23;  $^1\text{H NMR}$  (400 MHz,  $\text{CDCl}_3$ )  $\delta$  7.24 (d,  $J$  = 8.2 Hz, 2H), 7.10 (d,  $J$  = 8.2 Hz, 2H), 5.62 (d,  $J$  = 1.9 Hz, 1H), 3.54 (t,  $J$  = 5.5 Hz, 2H), 3.10 (t,  $J$  = 5.6 Hz, 2H), 2.78 (t,  $J$  = 7.6 Hz, 2H), 2.39 (t,  $J$  = 7.6 Hz, 2H), 1.85 (s, 3H), 1.57 (dq,  $J$  = 28.7, 6.2, 5.5 Hz, 4H), 1.41 (t,  $J$  = 5.8 Hz, 2H).  $^{13}\text{C NMR}$  (101 MHz,  $\text{CDCl}_3$ )  $\delta$  167.2, 145.1, 139.9, 131.8, 129.9, 128.6, 119.9, 47.3,

42.3, 40.8, 33.0, 26.7, 25.7, 24.7, 18.4. **ESI-HR** calcd for  $C_{17}H_{23}ClNO^+([M+H]^+)$  292.1463, found 292.1459. **IR**  $\nu$  ( $cm^{-1}$ ) 2939, 1651, 1606, 724. **M. P.** 55-57 °C.

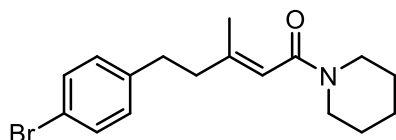

**amide 1o:** white solid. TLC analysis (hexanes/EtOAc 2:1)  $R_f$  = 0.19;  **$^1H$  NMR** (400 MHz,  $CDCl_3$ )  $\delta$  7.44 – 7.36 (m, 2H), 7.09 – 7.01 (m, 2H), 5.62 (q,  $J$  = 1.3 Hz, 1H), 3.54 (t,  $J$  = 5.5 Hz, 2H), 3.14 – 3.05 (m, 2H), 2.76 (t,  $J$  = 7.6 Hz, 2H), 2.39 (t,  $J$  = 7.6 Hz, 2H), 1.85 (d,  $J$  = 1.2 Hz, 3H), 1.66 – 1.49 (m, 4H), 1.41 (p,  $J$  = 5.9 Hz, 2H).  **$^{13}C$  NMR** (101 MHz,  $CDCl_3$ )  $\delta$  167.1, 145.0, 140.4, 131.5, 130.3, 120.0, 119.8, 47.2, 42.2, 40.7, 33.1, 26.7, 25.7, 24.7, 18.3. **ESI-HR** calcd for  $C_{17}H_{23}BrNO^+([M+H]^+)$  336.0958, found 336.0952. **IR**  $\nu$  ( $cm^{-1}$ ) 2935, 1650, 1614, 731. **M. P.** 58-60 °C.

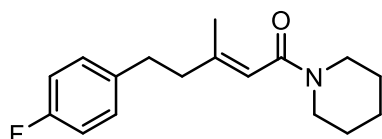

**amide 1p:** colorless oil. TLC analysis (hexanes/EtOAc 2:1)  $R_f$  = 0.30;  **$^1H$  NMR** (400 MHz,  $CDCl_3$ )  $\delta$  7.18 – 7.07 (m, 2H), 6.96 (t,  $J$  = 8.7 Hz, 2H), 5.64 (s, 1H), 3.54 (t,  $J$  = 5.5 Hz, 2H), 3.23 – 3.04 (m, 2H), 2.78 (t,  $J$  = 7.6 Hz, 2H), 2.39 (t,  $J$  = 7.6 Hz, 2H), 1.85 (s, 3H), 1.65 – 1.48 (m, 4H), 1.41 (p,  $J$  = 5.8 Hz, 2H).  **$^{13}C$  NMR** (101 MHz,  $CDCl_3$ )  $\delta$  167.2, 161.4 ( $J_1$  = 243.6 Hz), 145.2, 137.1 ( $J_4$  = 3.3 Hz), 129.9 ( $J_3$  = 7.8 Hz), 119.8, 115.2 ( $J_2$  = 21.8 Hz), 47.3, 42.2, 41.0, 32.9, 26.7, 25.7, 24.7, 18.4.  **$^{19}F$  NMR** (376 MHz,  $CDCl_3$ )  $\delta$  -117.5. **ESI-HR** calcd for  $C_{17}H_{23}FNO^+([M+H]^+)$  276.1758, found 276.1754. **IR**  $\nu$  ( $cm^{-1}$ ) 2935, 2850, 1650, 1616, 822.

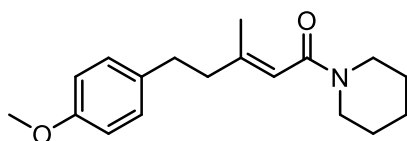

**amide 1q:** colorless oil. TLC analysis (hexanes/EtOAc 3:2)  $R_f$  = 0.29;  **$^1H$  NMR** (400 MHz,  $CDCl_3$ )  $\delta$  7.12 – 7.01 (m, 2H), 6.86 – 6.79 (m, 2H), 5.65 (q,  $J$  = 1.3 Hz, 1H), 3.78 (s,

3H), 3.54 (t,  $J = 5.5$  Hz, 2H), 3.14 (q,  $J = 4.9, 4.4$  Hz, 2H), 2.74 (dd,  $J = 8.5, 6.8$  Hz, 2H), 2.38 (ddd,  $J = 8.6, 6.8, 1.2$  Hz, 2H), 1.85 (d,  $J = 1.2$  Hz, 3H), 1.65 – 1.49 (m, 4H), 1.47 – 1.31 (m, 2H).  $^{13}\text{C NMR}$  (101 MHz,  $\text{CDCl}_3$ )  $\delta$  167.4, 157.9, 145.6, 133.5, 129.4, 119.6, 113.9, 55.3, 47.3, 42.2, 41.2, 32.8, 26.7, 25.7, 24.7, 18.4. **ESI-HR** calcd for  $\text{C}_{18}\text{H}_{26}\text{NO}_2^+$  ( $[\text{M}+\text{H}]^+$ ) 288.1959, found 288.1953. **IR**  $\nu$  ( $\text{cm}^{-1}$ ) 2935, 1649, 1611, 728.

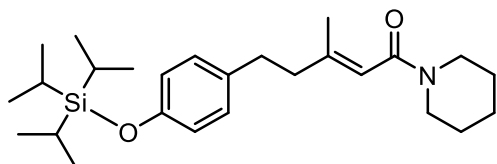

**amide 1r:** pale-yellow oil. TLC analysis (hexanes/EtOAc 1:1)  $R_f = 0.53$ ;  $^1\text{H NMR}$  (400 MHz,  $\text{CDCl}_3$ )  $\delta$  7.03 – 6.96 (m, 2H), 6.81 – 6.75 (m, 2H), 5.66 (q,  $J = 1.3$  Hz, 1H), 3.55 (t,  $J = 5.4$  Hz, 2H), 3.19 (t,  $J = 5.5$  Hz, 2H), 2.72 (dd,  $J = 8.6, 6.7$  Hz, 2H), 2.42 – 2.33 (m, 2H), 1.85 (d,  $J = 1.2$  Hz, 3H), 1.64 – 1.50 (m, 4H), 1.48 – 1.40 (m, 2H), 1.28 – 1.19 (m, 3H), 1.09 (d,  $J = 7.3$  Hz, 18H).  $^{13}\text{C NMR}$  (101 MHz,  $\text{CDCl}_3$ )  $\delta$  167.4, 154.3, 145.9, 133.8, 129.3, 119.8, 119.4, 47.4, 42.3, 41.2, 33.0, 26.7, 25.8, 24.8, 18.6, 18.0, 12.8. **ESI-HR** calcd for  $\text{C}_{26}\text{H}_{44}\text{NO}_2\text{Si}^+$  ( $[\text{M}+\text{H}]^+$ ) 430.3136, found 430.3131. **IR**  $\nu$  ( $\text{cm}^{-1}$ ) 2940, 2865, 1649, 1611, 733.

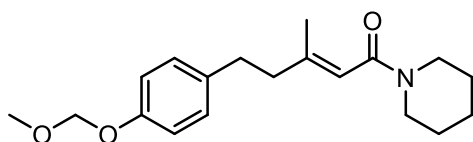

**amide 1s:** colorless oil. TLC analysis (hexanes/EtOAc 3:1)  $R_f = 0.25$ ;  $^1\text{H NMR}$  (400 MHz,  $\text{CDCl}_3$ )  $\delta$  7.09 (d,  $J = 8.4$  Hz, 2H), 6.99 – 6.91 (m, 2H), 5.65 (q,  $J = 1.3$  Hz, 1H), 5.15 (s, 2H), 3.54 (t,  $J = 5.5$  Hz, 2H), 3.47 (s, 3H), 3.15 (t,  $J = 5.6$  Hz, 2H), 2.75 (dd,  $J = 8.6, 6.8$  Hz, 2H), 2.39 (t,  $J = 7.7$  Hz, 2H), 1.85 (d,  $J = 1.2$  Hz, 3H), 1.64 – 1.50 (m, 4H), 1.42 (dq,  $J = 11.3, 5.3$  Hz, 2H).  $^{13}\text{C NMR}$  (101 MHz,  $\text{CDCl}_3$ )  $\delta$  167.4, 155.6, 145.5, 134.9, 129.4, 119.6, 116.3, 94.6, 56.0, 47.3, 42.2, 41.1, 32.9, 26.7, 25.7, 24.7, 18.4. **ESI-HR** calcd for  $\text{C}_{19}\text{H}_{28}\text{NO}_3^+$  ( $[\text{M}+\text{H}]^+$ ) 318.2064, found 318.2059. **IR**  $\nu$  ( $\text{cm}^{-1}$ ) 2932, 1649, 1616, 998, 828.

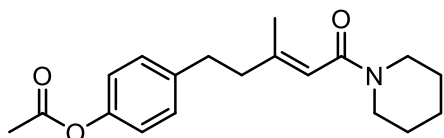

**amide 1t:** colorless oil. TLC analysis (hexanes/EtOAc 1:1)  $R_f = 0.31$ ;  $^1\text{H NMR}$  (400 MHz,  $\text{CDCl}_3$ )  $\delta$  7.22 – 7.13 (m, 2H), 7.06 – 6.95 (m, 2H), 5.66 (q,  $J = 1.3$  Hz, 1H), 3.54 (t,  $J = 5.5$  Hz, 2H), 3.15 (dd,  $J = 6.6, 4.4$  Hz, 2H), 2.80 (dd,  $J = 8.6, 6.8$  Hz, 2H), 2.41 (td,  $J = 7.6, 1.2$  Hz, 2H), 2.29 (s, 3H), 1.86 (d,  $J = 1.2$  Hz, 3H), 1.64 – 1.50 (m, 4H), 1.42 (tq,  $J = 7.6, 5.3, 4.3$  Hz, 2H).  $^{13}\text{C NMR}$  (101 MHz,  $\text{CDCl}_3$ )  $\delta$  169.7, 167.2, 149.0, 145.3, 139.0, 129.4, 121.5, 119.7, 47.3, 42.2, 40.9, 33.1, 26.7, 25.7, 24.7, 21.2, 18.4. **ESI-HR** calcd for  $\text{C}_{19}\text{H}_{26}\text{NO}_3^+$  ( $[\text{M}+\text{H}]^+$ ) 316.1907, found 316.1901. **IR**  $\nu$  ( $\text{cm}^{-1}$ ) 2934, 1758, 1648, 1617, 732.

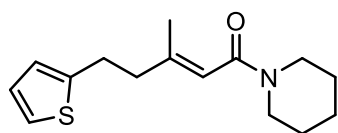

**amide 1u:** brown oil. TLC analysis (hexanes/EtOAc 2:1)  $R_f = 0.24$ ;  $^1\text{H NMR}$  (400 MHz,  $\text{CDCl}_3$ )  $\delta$  7.11 (dd,  $J = 5.2, 1.2$  Hz, 1H), 6.96 – 6.86 (m, 1H), 6.85 – 6.72 (m, 1H), 5.72 (q,  $J = 1.3$  Hz, 1H), 3.55 (t,  $J = 5.5$  Hz, 2H), 3.27 – 3.13 (m, 2H), 3.07 – 2.94 (m, 2H), 2.52 – 2.41 (m, 2H), 1.86 (d,  $J = 1.2$  Hz, 3H), 1.65 – 1.48 (m, 4H), 1.43 (dp,  $J = 11.3, 5.6, 4.5$  Hz, 2H).  $^{13}\text{C NMR}$  (101 MHz,  $\text{CDCl}_3$ )  $\delta$  167.2, 144.8, 144.2, 126.8, 124.6, 123.3, 120.0, 47.3, 42.3, 41.2, 27.9, 26.8, 25.8, 24.7, 18.3. **ESI-HR** calcd for  $\text{C}_{15}\text{H}_{22}\text{NOS}^+$  ( $[\text{M}+\text{H}]^+$ ) 264.1417, found 264.1412. **IR**  $\nu$  ( $\text{cm}^{-1}$ ) 2938, 1651, 1615, 729.

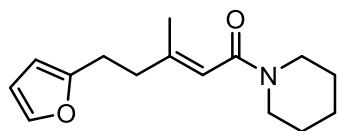

**amide 1v:** brown oil. TLC analysis (hexanes/EtOAc 1:1)  $R_f = 0.47$ ;  $^1\text{H NMR}$  (400 MHz,  $\text{CDCl}_3$ )  $\delta$  7.29 (d,  $J = 2.1$  Hz, 1H), 6.26 (q,  $J = 2.6$  Hz, 1H), 5.99 (d,  $J = 3.0$  Hz, 1H), 5.72 (q,  $J = 1.5$  Hz, 1H), 3.55 (dd,  $J = 6.4, 4.0$  Hz, 2H), 3.26 (dq,  $J = 5.6, 2.5$  Hz, 2H), 2.82 (td,  $J = 7.5, 2.2$  Hz, 2H), 2.48 – 2.38 (m, 2H), 1.84 (t,  $J = 1.7$  Hz, 3H), 1.68 – 1.39 (m, 6H).  $^{13}\text{C NMR}$  (101 MHz,  $\text{CDCl}_3$ )  $\delta$  167.3, 155.1, 145.1, 141.0, 119.6, 110.2,

105.4, 47.3, 42.3, 37.6, 26.7, 26.1, 25.7, 24.7, 18.3. **ESI-HR** calcd for  $C_{15}H_{22}NO_2^+$  ( $[M+H]^+$ ) 248.1645, found 248.1641. **IR**  $\nu$  ( $cm^{-1}$ ) 2939, 1651, 1606, 724.

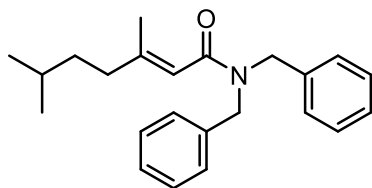

**amide 1w**: colorless oil. TLC analysis (hexanes/EtOAc 9:1)  $R_f$  = 0.32;  **$^1H$  NMR** (400 MHz,  $CDCl_3$ )  $\delta$  7.39 – 7.13 (m, 10H), 5.92 (q,  $J$  = 1.3 Hz, 1H), 4.60 (s, 2H), 4.45 (s, 2H), 2.07 (ddd,  $J$  = 9.4, 6.0, 1.2 Hz, 2H), 2.01 (d,  $J$  = 1.3 Hz, 3H), 1.46 (dt,  $J$  = 13.2, 6.6 Hz, 1H), 1.36 – 1.23 (m, 2H), 0.84 (d,  $J$  = 6.6 Hz, 6H).  **$^{13}C$  NMR** (101 MHz,  $CDCl_3$ )  $\delta$  169.1, 152.0, 137.7, 137.0, 128.9, 128.6, 128.5, 127.6, 127.4, 126.9, 117.1, 50.5, 47.3, 37.9, 36.7, 27.8, 22.5, 18.9. **ESI-HR** calcd for  $C_{23}H_{30}NO^+$  ( $[M+H]^+$ ) 336.2322, found 336.2315. **IR**  $\nu$  ( $cm^{-1}$ ) 2955, 1646, 1620, 728.

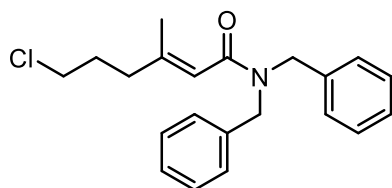

**amide 1x**: colorless oil. TLC analysis (hexanes/EtOAc 9:1)  $R_f$  = 0.20;  **$^1H$  NMR** (400 MHz,  $CDCl_3$ )  $\delta$  7.45 – 7.04 (m, 10H), 5.98 (t,  $J$  = 1.5 Hz, 1H), 4.60 (s, 2H), 4.45 (s, 2H), 3.45 (t,  $J$  = 6.4 Hz, 2H), 2.24 (t,  $J$  = 7.5 Hz, 2H), 2.02 (d,  $J$  = 1.4 Hz, 3H), 1.89 (dq,  $J$  = 9.0, 6.5 Hz, 2H).  **$^{13}C$  NMR** (101 MHz,  $CDCl_3$ )  $\delta$  168.7, 149.5, 137.5, 136.8, 129.0, 128.7, 128.5, 127.7, 127.5, 126.8, 118.6, 50.5, 47.4, 44.3, 36.9, 30.1, 18.7. **ESI-HR** calcd for  $C_{21}H_{25}ClNO^+$  ( $[M+H]^+$ ) 342.1619, found 342.1613. **IR**  $\nu$  ( $cm^{-1}$ ) 2915, 1648, 1624, 697.

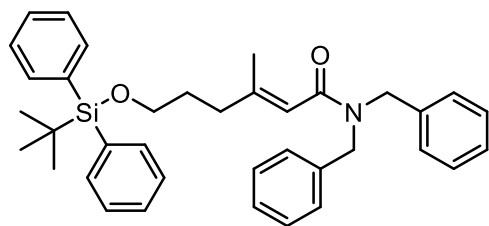

**amide 1y**: pale-yellow oil. TLC analysis (hexanes/EtOAc 7:1)  $R_f$  = 0.35;  **$^1H$  NMR** (400 MHz,  $CDCl_3$ )  $\delta$  7.66 – 7.57 (m, 4H), 7.43 – 7.21 (m, 14H), 7.17 – 7.07 (m, 2H), 5.90

(q,  $J = 1.3$  Hz, 1H), 4.58 (s, 2H), 4.39 (s, 2H), 3.62 (t,  $J = 6.3$  Hz, 2H), 2.24 – 2.10 (m, 2H), 1.99 (s,  $J = 1.1$  Hz, 3H), 1.71 – 1.58 (m, 2H), 1.01 (s, 9H).  $^{13}\text{C}$  NMR (101 MHz,  $\text{CDCl}_3$ )  $\delta$  169.0, 151.2, 137.7, 136.9, 135.7, 134.0, 129.7, 129.0, 128.7, 128.5, 127.8, 127.7, 127.5, 127.0, 117.5, 63.4, 50.5, 47.4, 36.3, 30.6, 27.0, 19.3, 19.0. **ESI-HR** calcd for  $\text{C}_{37}\text{H}_{44}\text{NO}_2\text{Si}^+$  ( $[\text{M}+\text{H}]^+$ ) 562.3130, found 562.3131. **IR**  $\nu$  ( $\text{cm}^{-1}$ ) 2923, 2856, 1626, 1428, 699.

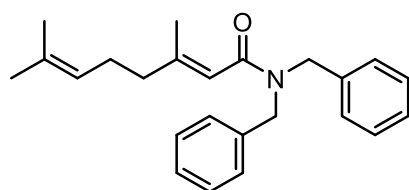

**amide 1z:** colorless oil. TLC analysis (hexanes/EtOAc 9:1)  $R_f = 0.39$ ;  $^1\text{H}$  NMR (400 MHz,  $\text{CDCl}_3$ )  $\delta$  7.38 – 7.12 (m, 10H), 5.91 (q,  $J = 1.3$  Hz, 1H), 5.01 (dq,  $J = 6.1, 3.8, 1.6$  Hz, 1H), 4.59 (s, 2H), 4.45 (s, 2H), 2.14 (dd,  $J = 21.8, 2.3$  Hz, 4H), 2.01 (d,  $J = 1.2$  Hz, 3H), 1.57 (d,  $J = 1.3$  Hz, 3H), 1.52 (d,  $J = 1.3$  Hz, 3H).  $^{13}\text{C}$  NMR (101 MHz,  $\text{CDCl}_3$ )  $\delta$  169.2, 150.7, 137.6, 136.9, 132.3, 128.9, 128.7, 128.5, 127.6, 127.4, 126.9, 123.5, 117.6, 50.4, 47.2, 39.9, 26.0, 25.7, 18.9, 17.8. **ESI-HR** calcd for  $\text{C}_{24}\text{H}_{30}\text{NO}^+$  ( $[\text{M}+\text{H}]^+$ ) 348.2322, found 348.2317. **IR**  $\nu$  ( $\text{cm}^{-1}$ ) 2914, 1627, 732, 697.

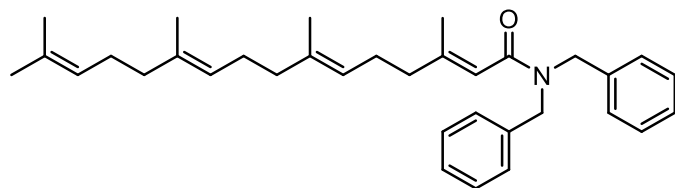

**amide 1aa:** colorless oil. TLC analysis (hexanes/EtOAc 9:1)  $R_f = 0.31$ ;  $^1\text{H}$  NMR (400 MHz,  $\text{CDCl}_3$ )  $\delta$  7.43 – 7.09 (m, 10H), 5.92 (d,  $J = 1.7$  Hz, 1H), 5.13 – 4.95 (m, 3H), 4.59 (s, 2H), 4.44 (s, 2H), 2.12 (d,  $J = 3.3$  Hz, 4H), 2.10 – 1.84 (m, 11H), 1.67 (d,  $J = 1.5$  Hz, 3H), 1.59 (d,  $J = 1.3$  Hz, 3H), 1.54 (dd,  $J = 8.7, 1.3$  Hz, 6H).  $^{13}\text{C}$  NMR (101 MHz,  $\text{CDCl}_3$ )  $\delta$  169.1, 151.0, 137.7, 136.9, 136.1, 135.1, 131.4, 129.0, 128.7, 128.5, 127.7, 127.4, 126.9, 124.5, 124.2, 123.3, 117.5, 50.5, 47.2, 40.0, 39.8, 39.7, 26.9, 26.7, 26.0, 25.8, 19.0, 17.8, 16.2, 16.1. **ESI-HR** calcd for  $\text{C}_{34}\text{H}_{46}\text{NO}^+$  ( $[\text{M}+\text{H}]^+$ ) 484.3574, found 484.3572. **IR**  $\nu$  ( $\text{cm}^{-1}$ ) 2916, 1648, 1618, 906, 727.

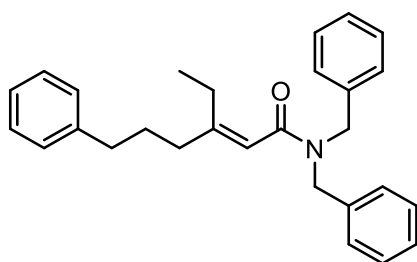

**amide 1ab:** colorless oil. TLC analysis (hexanes/EtOAc 7:1)  $R_f = 0.35$ ;  $^1\text{H NMR}$  (400 MHz,  $\text{CDCl}_3$ )  $\delta$  7.40 – 7.21 (m, 10H), 7.18 – 7.06 (m, 5H), 5.88 (s, 1H), 4.60 (s, 2H), 4.45 (s, 2H), 2.56 (t,  $J = 7.8$  Hz, 2H), 2.44 (q,  $J = 7.5$  Hz, 2H), 2.13 (t,  $J = 7.7$  Hz, 2H), 1.79 – 1.69 (m, 2H), 1.09 (t,  $J = 7.5$  Hz, 3H).  $^{13}\text{C NMR}$  (101 MHz,  $\text{CDCl}_3$ )  $\delta$  169.0, 156.2, 142.0, 137.6, 136.9, 129.0, 128.7, 128.6, 128.5, 128.4, 127.7, 127.4, 126.9, 125.9, 117.1, 50.6, 47.3, 36.1, 35.6, 29.4, 25.6, 13.1. **ESI-HR** calcd for  $\text{C}_{28}\text{H}_{32}\text{NO}^+$  ( $[\text{M}+\text{H}]^+$ ) 398.2478, found 398.2472. **IR**  $\nu$  ( $\text{cm}^{-1}$ ) 3027, 2934, 1626, 1494, 1216, 696.

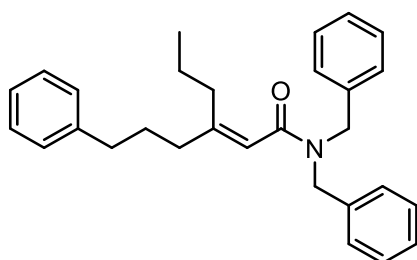

**amide 1ac:** colorless oil. TLC analysis (hexanes/EtOAc 7:1)  $R_f = 0.37$ ;  $^1\text{H NMR}$  (400 MHz,  $\text{CDCl}_3$ )  $\delta$  7.38 – 7.28 (m, 5H), 7.23 (d,  $J = 7.4$  Hz, 2H), 7.19 – 7.06 (m, 5H), 5.90 (s, 1H), 4.59 (s, 2H), 4.45 (s, 2H), 2.56 (t,  $J = 7.8$  Hz, 2H), 2.46 – 2.35 (m, 2H), 2.12 (t,  $J = 7.7$  Hz, 2H), 1.73 (p,  $J = 7.8$  Hz, 2H), 1.49 (h,  $J = 7.4$  Hz, 2H), 0.94 (t,  $J = 7.3$  Hz, 3H).  $^{13}\text{C NMR}$  (101 MHz,  $\text{CDCl}_3$ )  $\delta$  169.1, 154.4, 142.1, 137.6, 136.9, 129.0, 128.7, 128.5, 128.4, 127.7, 127.5, 126.9, 125.9, 117.8, 50.6, 47.3, 36.5, 35.6, 34.4, 29.4, 21.8, 14.4. **ESI-HR** calcd for  $\text{C}_{29}\text{H}_{34}\text{NO}^+$  ( $[\text{M}+\text{H}]^+$ ) 412.2635, found 412.2627. **IR**  $\nu$  ( $\text{cm}^{-1}$ ) 2945, 1676, 1641, 1144, 710.

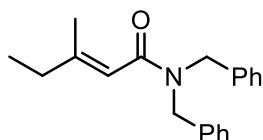



**amide 1ad:** colorless oil. TLC analysis (hexanes/EtOAc 11:1)  $R_f = 0.23$ ;  $^1\text{H NMR}$  (400 MHz,  $\text{CDCl}_3$ )  $\delta$  7.40 – 7.12 (m, 10H), 5.92 (p,  $J = 1.3$  Hz, 1H), 4.60 (s, 2H), 4.45 (s, 2H), 2.10 (q,  $J = 7.4$  Hz, 2H), 2.02 (d,  $J = 1.1$  Hz, 3H), 1.01 (t,  $J = 7.4$  Hz, 3H).  $^{13}\text{C NMR}$  (101 MHz,  $\text{CDCl}_3$ )  $\delta$  169.2, 152.8, 137.6, 137.0, 128.9, 128.6, 128.4, 127.6, 127.4, 126.9, 116.3, 50.5, 47.3, 32.7, 18.9, 12.1. **ESI-HR** calcd for  $\text{C}_{20}\text{H}_{24}\text{NO}^+$  ( $[\text{M}+\text{H}]^+$ ) 294.1852, found 294.1847. **IR**  $\nu$  ( $\text{cm}^{-1}$ ) 2966, 1625, 1494, 1224, 697.

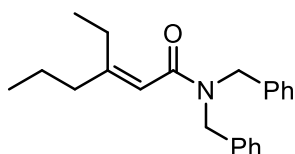

**amide 1ae:** colorless oil. TLC analysis (hexanes/EtOAc 9:1)  $R_f = 0.53$ ;  $^1\text{H NMR}$  (400 MHz,  $\text{CDCl}_3$ )  $\delta$  7.55 – 6.95 (m, 10H), 5.87 (s, 1H), 4.59 (s, 2H), 4.45 (s, 2H), 2.43 (q,  $J = 7.5$  Hz, 2H), 2.15 – 2.03 (m, 2H), 1.42 (dt,  $J = 14.8, 7.4$  Hz, 2H), 1.10 (t,  $J = 7.5$  Hz, 3H), 0.86 (t,  $J = 7.3$  Hz, 3H).  $^{13}\text{C NMR}$  (101 MHz,  $\text{CDCl}_3$ )  $\delta$  169.0, 156.6, 137.6, 136.9, 128.9, 128.6, 128.4, 127.6, 127.4, 126.9, 116.9, 50.5, 47.2, 38.7, 25.6, 20.9, 13.9, 13.1. **ESI-HR** calcd for  $\text{C}_{22}\text{H}_{28}\text{NO}^+$  ( $[\text{M}+\text{H}]^+$ ) 322.2165, found 322.2158. **IR**  $\nu$  ( $\text{cm}^{-1}$ ) 2959, 1626, 1494, 1359, 1215, 697.

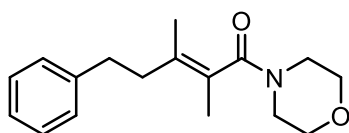

**amide 1af:** pale yellow oil. TLC analysis (hexanes/EtOAc 2:1)  $R_f = 0.30$ ;  $^1\text{H NMR}$  (400 MHz,  $\text{CDCl}_3$ )  $\delta$  7.48 – 6.92 (m, 5H), 3.62 (t,  $J = 7.4$  Hz, 4H), 3.50 – 3.40 (m, 2H), 3.02 – 2.95 (m, 2H), 2.88 – 2.49 (m, 3H), 2.28 (s, 1H), 1.67 (d,  $J = 2.3$  Hz, 6H).  $^{13}\text{C NMR}$  (101 MHz,  $\text{CDCl}_3$ )  $\delta$  172.2, 141.5, 132.7, 128.6, 128.4, 126.5, 126.1, 67.2, 66.9, 46.3, 41.4, 34.2, 33.5, 19.3, 15.8. **ESI-HR** calcd for  $\text{C}_{17}\text{H}_{24}\text{NO}_2^+$  ( $[\text{M}+\text{H}]^+$ ) 274.1802, found 274.1795. **IR**  $\nu$  ( $\text{cm}^{-1}$ ) 2854, 1626, 1496, 1426, 1229, 1121, 700.

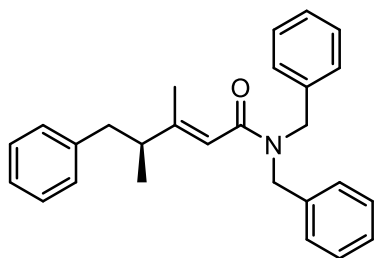

**amide 1ag:** colorless oil. TLC analysis (hexanes/EtOAc 11:1)  $R_f = 0.26$ ;  $^1\text{H NMR}$  (400 MHz,  $\text{CDCl}_3$ )  $\delta$  7.37 – 6.98 (m, 15H), 5.74 (s, 1H), 4.63 (d,  $J = 14.8$  Hz, 1H), 4.42 (d,  $J = 14.8$  Hz, 1H), 4.15 – 3.96 (m, 2H), 2.69 (dd,  $J = 13.4, 8.0$  Hz, 1H), 2.58 (dd,  $J = 13.5, 6.8$  Hz, 1H), 2.50 (p,  $J = 6.9$  Hz, 1H), 1.97 (d,  $J = 1.3$  Hz, 3H), 1.05 (d,  $J = 6.8$  Hz, 3H).  $^{13}\text{C NMR}$  (101 MHz,  $\text{CDCl}_3$ )  $\delta$  169.0, 153.0, 140.4, 137.5, 136.9, 128.9, 128.8, 128.6, 128.3, 128.3, 127.5, 127.3, 126.9, 126.0, 118.1, 50.2, 47.1, 45.1, 41.4, 18.8, 15.6. **ESI-HR** calcd for  $\text{C}_{27}\text{H}_{30}\text{NO}^+$  ( $[\text{M}+\text{H}]^+$ ) 384.2322, found 384.2313. **IR**  $\nu$  ( $\text{cm}^{-1}$ ) 3019, 1618, 1265, 1215, 748, 703.  $[\alpha]_{\text{D}}^{20} = +48.9$  ( $c = 0.70, \text{CHCl}_3$ )

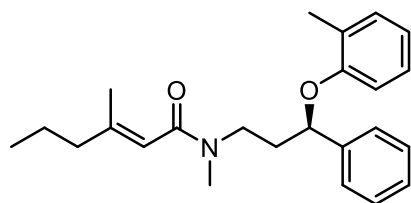

**amide 1ah:** colorless oil. Two sets of peaks were observed in  $^1\text{H}$  and  $^{13}\text{C NMR}$  spectra due to carbamate rotamers, which are assigned to major and minor rotamers, respectively. TLC analysis (hexanes/EtOAc 2:1)  $R_f = 0.38$ ;  $^1\text{H NMR}$  (400 MHz,  $\text{CDCl}_3$ )  $\delta$  7.46 – 7.19 (m, 5H, *overlapping*), 7.15 – 7.07 (m, 1H, *overlapping*), 6.93 (t,  $J = 7.8$  Hz, 1H, *overlapping*), 6.76 (td,  $J = 7.3, 4.5$  Hz, 1H, *overlapping*), 6.58 (d,  $J = 8.2$  Hz, 1H, *minor*), 6.53 (d,  $J = 8.2$  Hz, 1H, *major*), 5.78 – 5.74 (m, 1H, *minor*), 5.71 – 5.66 (m, 1H, *major*), 5.19 (dd,  $J = 8.4, 4.6$  Hz, 1H, *minor*), 5.13 (dd,  $J = 8.1, 4.2$  Hz, 1H, *major*), 3.72 – 3.58 (m, 2H, *minor*), 3.46 (m, 2H, *major*), 2.95 (s, 3H, *overlapping*), 2.34 (s, 3H, *overlapping*), 2.15 (m, 3H, *overlapping*), 1.90 – 1.82 (m, 4H, *overlapping*), 1.48 (p,  $J = 7.4$  Hz, 2H, *minor*), 1.34 (h,  $J = 7.3$  Hz, 2H, *major*), 0.91 (t,  $J = 7.3$  Hz, 3H, *minor*), 0.84 (t,  $J = 7.3$  Hz, 3H, *major*).  $^{13}\text{C NMR}$  (101 MHz,  $\text{CDCl}_3$ )  $\delta$  168.7 (*major*), 168.5 (*minor*), 155.9 (*minor*), 155.5 (*major*), 150.8 (*major*), 149.4 (*minor*), 141.8 (*minor*),

141.3 (*major*), 130.7 (*major*), 130.7 (*minor*), 128.8 (*major*), 128.7 (*minor*), 127.8 (*major*), 127.6 (*minor*), 127.0 (*minor*), 126.7 (*major*), 126.7 (*major*), 126.6 (*minor*), 125.8, (*minor*) 125.6 (*major*), 120.5 (*major*), 120.3 (*minor*), 117.9 (*minor*), 116.9 (*major*), 112.8 (*major*), 112.5 (*minor*), 77.7 (*minor*), 76.3 (*major*), 46.9 (*major*), 44.8 (*minor*), 41.9 (*overlapping*), 37.5 (*major*), 36.6 (*minor*), 36.3 (*minor*), 32.8 (*major*), 20.7 (*overlapping*), 18.5 (*major*), 18.4 (*minor*), 16.6 (*major*), 16.6 (*minor*), 13.8 (*major*), 13.8 (*minor*). **ESI-HR** calcd for C<sub>24</sub>H<sub>32</sub>NO<sub>2</sub><sup>+</sup> ([M+H]<sup>+</sup>) 366.2428, found 366.2420. **IR**  $\nu$  (cm<sup>-1</sup>) 2957, 2931, 1650, 1625, 1492, 1238, 750, 701.  $[\alpha]_D^{20} = -22.3$  (*c* = 6.00, CHCl<sub>3</sub>)

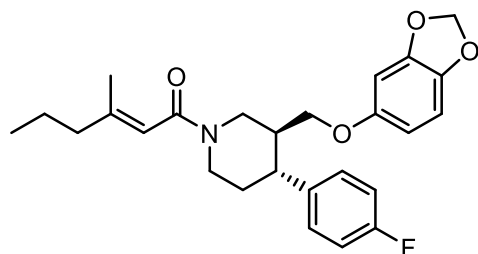

**amide 1ai:** colorless oil. Two sets of peaks were observed in <sup>1</sup>H, <sup>13</sup>C and <sup>19</sup>F NMR spectra due to carbamate rotamers, which are assigned to major and minor rotamers, respectively. TLC analysis (hexanes/EtOAc 2:1) R<sub>f</sub> = 0.32; <sup>1</sup>H NMR (400 MHz, CDCl<sub>3</sub>)  $\delta$  7.20 – 7.06 (m, 2H, *overlapping*), 6.98 (q, J = 7.7, 7.3 Hz, 2H, *overlapping*), 6.63 (dd, J = 8.4, 2.1 Hz, 1H, *overlapping*), 6.34 (dd, J = 17.7, 2.5 Hz, 1H, *overlapping*), 6.13 (ddd, J = 14.0, 8.4, 2.6 Hz, 1H, *overlapping*), 5.88 (d, J = 2.4 Hz, 2H, *overlapping*), 5.83 (s, 1H, *overlapping*), 4.95 (m, 1H, *minor*), 4.89 – 4.73 (m, 1H, *major*), 4.32 (d, J = 13.3 Hz, 1H, *major*), 4.08 (d, J = 13.3 Hz, 1H, *minor*), 3.62 (ddd, J = 21.0, 9.6, 2.9 Hz, 1H, *overlapping*), 3.53 – 3.38 (m, 1H, *overlapping*), 3.17 – 2.99 (m, 1H, *overlapping*), 2.89 – 2.63 (m, 2H, *overlapping*), 2.17 – 1.98 (m, 3H, *overlapping*), 1.95 – 1.83 (m, 4H, *overlapping*), 1.71 (qd, J = 13.8, 13.1, 4.3 Hz, 1H, *overlapping*), 1.52 (p, J = 7.4 Hz, 2H, *overlapping*), 0.94 (q, J = 7.2 Hz, 3H, *overlapping*). <sup>13</sup>C NMR (101 MHz, CDCl<sub>3</sub>)  $\delta$  168.7 (*major*), 168.5 (*minor*), 155.9 (*minor*), 155.5 (*major*), 150.8 (*major*), 149.4 (*minor*), 141.8 (*minor*), 141.3 (*major*), 130.7 (*major*), 130.7 (*minor*),



(d,  $J = 7.7$  Hz, 1H, *major*), 5.79 – 5.53 (m, 2H, *overlapping*), 3.76 (ddd,  $J = 12.8, 10.4, 5.8$  Hz, 1H, *overlapping*), 3.60 – 3.45 (m, 1H, *overlapping*), 2.97 (s, 3H, *overlapping*), 2.61 – 2.29 (m, 2H, *overlapping*), 2.05 (t,  $J = 7.6$  Hz, 1H, *overlapping*), 1.88 (s, 3H, *minor*), 1.80 (s, 3H, *major*), 1.64 (td,  $J = 7.3, 4.4$  Hz, 1H, *overlapping*), 1.47 (h,  $J = 7.3$  Hz, 1H, *overlapping*), 1.18 (h,  $J = 7.5$  Hz, 1H, *overlapping*), 0.90 (t,  $J = 7.4$  Hz, 3H, *minor*), 0.68 (t,  $J = 7.3$  Hz, 3H, *major*).  $^{13}\text{C}$  NMR (101 MHz,  $\text{CDCl}_3$ )  $\delta$  168.9 (*major*), 168.7 (*minor*), 153.2 (*minor*), 152.8 (*major*), 151.0 (*major*), 149.8 (*minor*), 144.9 (*minor*), 144.4 (*major*), 134.7 (*major*), 134.7 (*minor*), 127.7 (*major*), 127.6 (*minor*), 126.8 (*major*), 126.7 (*minor*), 126.5 (*major*), 126.4 (*minor*), 126.2 (*minor*), 126.0 (*major*), 125.8 (*minor*), 125.8 (*major*), 125.5 (*major*), 125.4 (*minor*), 125.0 (*major*), 125.0 (*minor*), 124.9 (*minor*), 124.8 (*major*), 122.2 (*minor*), 121.9 (*major*), 121.0 (*major*), 120.8 (*minor*), 117.8 (*minor*), 116.8 (*major*), 107.1 (*minor*), 106.8 (*major*), 74.7 (*minor*), 73.0 (*major*), 46.7 (*major*), 44.7 (*minor*), 42.0 (*minor*), 41.8 (*major*), 37.8 (*major*), 36.8 (*minor*), 36.5 (*minor*), 32.9 (*major*), 20.7 (*minor*), 20.6 (*major*), 18.6 (*major*), 18.5 (*minor*), 13.8 (*minor*), 13.8 (*major*). **ESI-HR** calcd for  $\text{C}_{25}\text{H}_{30}\text{NO}_2\text{S}^+$  ( $[\text{M}+\text{H}]^+$ ) 408.1992, found 408.1987. **IR**  $\nu$  ( $\text{cm}^{-1}$ ) 3018, 2962, 1610, 1470, 1214, 745. **M. P.** 100-102 °C.  $[\alpha]_{\text{D}}^{20} = +142.2$  ( $c = 0.59, \text{CHCl}_3$ )

### Characterization of Products

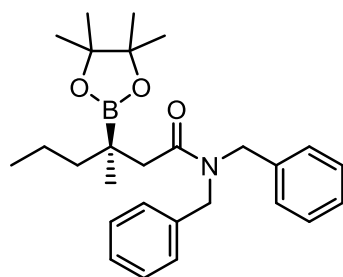

**product 3a:** Following the general procedure, amide **1a** (76.8 mg, 0.25 mmol) was converted to the boration product. Purification by silica gel chromatography gave 94.8 mg (87% yield) of **3a** as a white solid. TLC analysis (hexanes/EtOAc 11:1)  $R_f = 0.34$ ;  $^1\text{H}$  NMR (400 MHz,  $\text{CDCl}_3$ )  $\delta$  7.50 – 7.06 (m, 10H), 4.78 (d,  $J = 14.7$  Hz, 1H), 4.45 (d,  $J = 16.9$  Hz, 1H), 4.31 (d,  $J = 15.7$  Hz, 2H), 2.64 (d,  $J = 16.6$  Hz, 1H), 2.30 (d,  $J = 16.6$

Hz, 1H), 1.29 (m,  $J = 6.6$  Hz, 16H), 1.02 (s, 3H), 0.87 (t,  $J = 6.9$  Hz, 3H).  $^{13}\text{C}$  NMR (101 MHz,  $\text{CDCl}_3$ )  $\delta$  174.1, 137.4, 136.4, 129.0, 128.6, 128.5, 127.7, 127.4, 126.5, 82.5, 49.6, 48.2, 44.2, 41.2, 25.2, 25.1, 21.7, 18.4, 15.2. **ESI-HR** calcd for  $\text{C}_{27}\text{H}_{39}\text{BNO}_3^+$  ( $[\text{M}+\text{H}]^+$ ) 436.3018, found 436.3007. **IR**  $\nu$  ( $\text{cm}^{-1}$ ) 2957, 1644, 1142, 751. **M. P.** 71-73  $^\circ\text{C}$ .  $[\alpha]_{\text{D}}^{20} = +56.3$  ( $c = 0.36$ ,  $\text{CHCl}_3$ ) for a 96% *ee* sample. The enantiomeric purity of this compound was determined by HPLC analysis in comparison with authentic racemic material (Chiralpak AD, 99.5:0.5 hexanes:*i*-PrOH, 1.0 mL/min, 208 nm):  $t_{\text{major}} = 6.579$  min,  $t_{\text{minor}} = 7.906$  min.

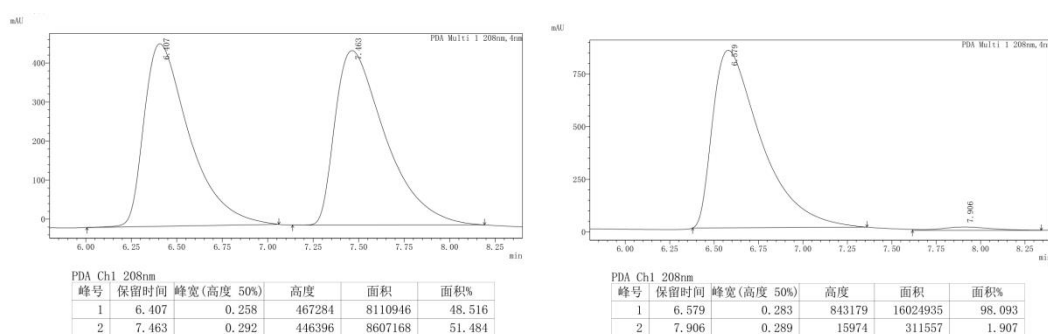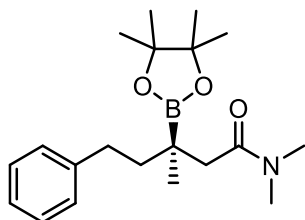

**product 3b:** Following the general procedure, amide **1b** (54.3 mg, 0.25 mmol) was converted to the boration product. Purification by silica gel chromatography gave 46.5 mg (54% yield) of **3b** as a white solid. TLC analysis (hexanes/EtOAc 1:2)  $R_f = 0.36$ ;  $^1\text{H}$  NMR(400 MHz,  $\text{CDCl}_3$ )  $\delta$  7.41 – 7.06 (m, 5H), 2.95 (d,  $J = 1.6$  Hz, 6H), 2.73 – 2.55 (m, 2H), 2.50 (d,  $J = 16.6$  Hz, 1H), 2.25 (d,  $J = 16.6$  Hz, 1H), 1.77 – 1.69 (m, 1H), 1.65 – 1.54 (m, 1H), 1.25 (d,  $J = 8.3$  Hz, 12H), 1.05 (s, 3H).  $^{13}\text{C}$  NMR (101 MHz,  $\text{CDCl}_3$ )  $\delta$  174.7, 143.9, 128.5, 128.3, 125.5, 81.9, 44.4, 41.1, 37.3, 35.9, 32.0, 25.3, 25.2, 22.2. **ESI-HR** calcd for  $\text{C}_{20}\text{H}_{33}\text{BNO}_3^+$  ( $[\text{M}+\text{H}]^+$ ) 346.2548, found 346.2539. **IR**  $\nu$  ( $\text{cm}^{-1}$ ) 2982, 2927, 1637, 1140, 699. **M. P.** 88-90  $^\circ\text{C}$ .  $[\alpha]_{\text{D}}^{20} = +32.5$  ( $c = 0.43$ ,  $\text{CHCl}_3$ ) for a 93% *ee* sample. The enantiomeric purity of this compound was determined by HPLC analysis in comparison with authentic racemic material

(Chiralpak OD, 98.0:2.0 hexanes:*i*-PrOH, 1.0 mL/min, 208 nm):  $t_{\text{major}} = 7.034$  min,  $t_{\text{minor}} = 6.005$  min.

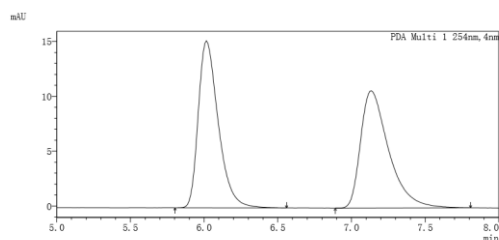

<Peak Results>

| Index | Time/min | Height/mAU | Quantity/Area | Area % |
|-------|----------|------------|---------------|--------|
| 1     | 6.016    | 15227      | 143565        | 50.311 |
| 2     | 7.133    | 10691      | 141793        | 49.689 |

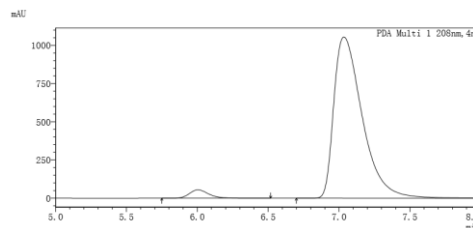

<Peak Results>

| Index | Time/min | Height/mAU | Quantity/Area | Area % |
|-------|----------|------------|---------------|--------|
| 1     | 6.005    | 54994      | 521139        | 3.406  |
| 2     | 7.034    | 1055245    | 14781060      | 96.594 |

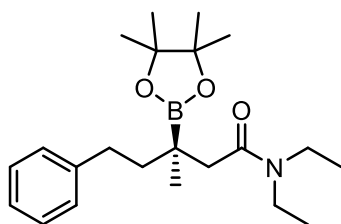

**product 3c**: Following the general procedure, amide **1c** (61.3 mg, 0.25 mmol) was converted to the boration product. Purification by silica gel chromatography gave 62.1 mg (67% yield) of **3c** as a colorless oil. TLC analysis (hexanes/EtOAc 2:1)  $R_f = 0.38$ ;  $^1\text{H NMR}$  (400 MHz,  $\text{CDCl}_3$ )  $\delta$  7.36 – 7.10 (m, 5H), 3.46 (dq,  $J = 14.2, 7.2$  Hz, 1H), 3.38 – 3.21 (m, 3H), 2.69 (td,  $J = 12.8, 5.0$  Hz, 1H), 2.63 – 2.43 (m, 2H), 2.25 (d,  $J = 16.6$  Hz, 1H), 1.78 – 1.56 (m, 2H), 1.23 (d,  $J = 6.7$  Hz, 12H), 1.14 (dt,  $J = 14.2, 7.2$  Hz, 6H), 1.03 (s, 3H).  $^{13}\text{C NMR}$  (101 MHz,  $\text{CDCl}_3$ )  $\delta$  175.0, 144.1, 128.6, 128.3, 125.5, 81.3, 44.2, 42.4, 41.3, 41.0, 32.0, 25.4, 25.3, 22.2, 14.1, 13.0. **ESI-HR** calcd for  $\text{C}_{22}\text{H}_{37}\text{BNO}_3^+$  ( $[\text{M}+\text{H}]^+$ ) 374.2861, found 374.2854. **IR**  $\nu$  ( $\text{cm}^{-1}$ ) 2972, 2933, 1632, 1140, 671.  $[\alpha]_{\text{D}}^{20} = +16.3$  ( $c = 0.52$ ,  $\text{CHCl}_3$ ) for a 95% *ee* sample. The enantiomeric purity of this compound was determined by HPLC analysis in comparison with authentic racemic material (Chiralpak OD, 99.7:0.3 hexanes:*i*-PrOH, 1.0 mL/min, 208 nm):  $t_{\text{major}} = 12.201$  min,  $t_{\text{minor}} = 9.825$  min.

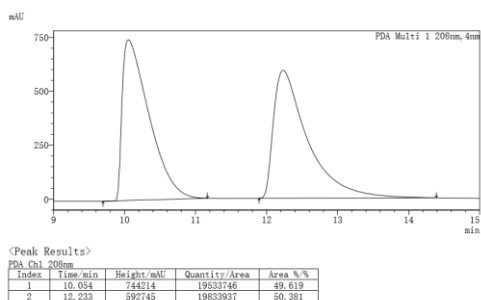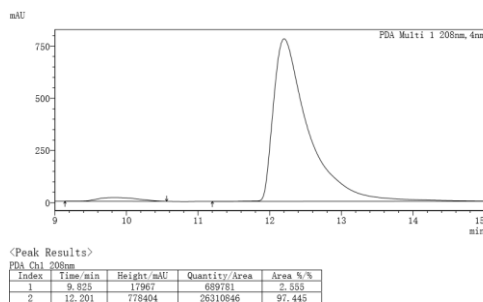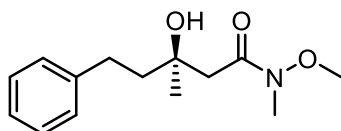

**product 3d-ol:** Following the general procedure with amide **1d** (58.3mg, 0.25 mmol). After the reaction, the residue was dissolved in THF (2.0 mL), H<sub>2</sub>O (2.0 mL), then sodium perborate trihydrate (4.0 equiv) was added. The reaction was stirred at room temperature for 12 h. Ethyl acetate (20 mL) was added, and the mixture was washed with water (10 mL), brine (10 mL) and dried over Na<sub>2</sub>SO<sub>4</sub>. After removal of the solvent, the residue was purified by column chromatography on silica gel with EtOAc/hexanes mixture as eluent to give 34.3 mg (55% yield) of **3d-ol** as a colorless oil. TLC analysis (hexanes/EtOAc 2:1) R<sub>f</sub> = 0.35; <sup>1</sup>H NMR (400 MHz, CDCl<sub>3</sub>) δ 7.37 – 7.12 (m, 5H), 4.83 (s, 1H), 3.67 (s, 3H), 3.20 (s, 3H), 2.83 – 2.55 (m, 4H), 1.95 – 1.75 (m, 2H), 1.32 (s, 3H). <sup>13</sup>C NMR (101 MHz, CDCl<sub>3</sub>) δ 174.0, 142.7, 128.5, 128.5, 125.8, 71.2, 61.5, 44.2, 40.7, 31.8, 30.4, 27.1. **ESI-HR** calcd for C<sub>14</sub>H<sub>22</sub>NO<sub>3</sub><sup>+</sup> ([M+H]<sup>+</sup>) 252.1594, found 252.1591. **IR** ν (cm<sup>-1</sup>) 3432, 2936, 1634, 1455, 746. [α]<sub>D</sub><sup>20</sup> = + 78.7 (c = 0.71, CHCl<sub>3</sub>) for a 93% *ee* sample. The enantiomeric purity of this compound was determined by HPLC analysis in comparison with authentic racemic material (Chiralpak AD, 90.0:10.0 hexanes:*i*-PrOH, 1.0 mL/min, 208 nm): *t*<sub>major</sub> = 8.772 min, *t*<sub>minor</sub> = 8.172 min.

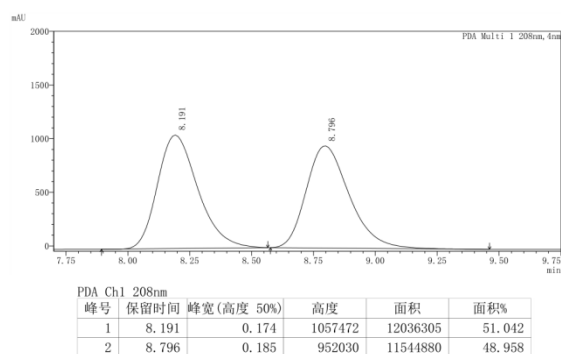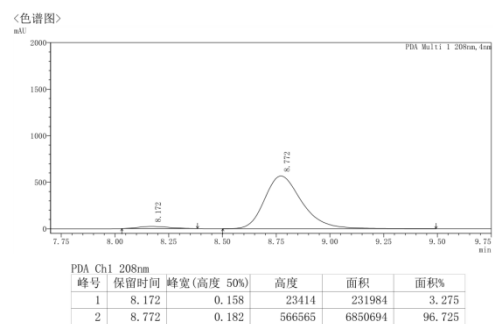



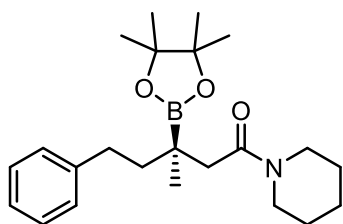

**product 3e:** Following the general procedure, amide **1e** (64.3 mg, 0.25 mmol) was converted to the boration product. Purification by silica gel chromatography gave 81.7 mg (85% yield) of **3e** as a white solid. TLC analysis (hexanes/EtOAc 1:1)  $R_f = 0.44$ ;  $^1\text{H NMR}$  (400 MHz,  $\text{CDCl}_3$ )  $\delta$  7.26 – 7.11 (m, 5H), 3.57 (qt,  $J = 13.1, 5.4$  Hz, 2H), 3.35 (q,  $J = 5.9$  Hz, 2H), 2.70 (td,  $J = 12.8, 4.9$  Hz, 1H), 2.63 – 2.42 (m, 2H), 2.27 (d,  $J = 16.6$  Hz, 1H), 1.77 – 1.45 (m, 8H), 1.23 (d,  $J = 6.8$  Hz, 12H), 1.04 (s, 3H).  $^{13}\text{C NMR}$  (101 MHz,  $\text{CDCl}_3$ )  $\delta$  173.9, 144.1, 128.6, 128.3, 125.5, 81.3, 46.8, 44.1, 41.1, 32.1, 26.3, 25.6, 25.4, 25.3, 24.3, 22.4. **ESI-HR** calcd for  $\text{C}_{23}\text{H}_{37}\text{BNO}_3^+$  ( $[\text{M}+\text{H}]^+$ ) 386.2861, found 386.2849. **IR**  $\nu$  ( $\text{cm}^{-1}$ ) 2939, 2858, 1620, 1445, 1139, 730. **M. P.** 109-111 °C.  $[\alpha]_D^{20} = +12.3$  ( $c = 0.96$ ,  $\text{CHCl}_3$ ) for a 96% *ee* sample. The enantiomeric purity of this compound was determined by HPLC analysis in comparison with authentic racemic material (Chiralpak OD, 99.2:0.8 hexanes:*i*-PrOH, 1.0 mL/min, 208 nm):  $t_{\text{major}} = 9.930$  min,  $t_{\text{minor}} = 7.229$  min.

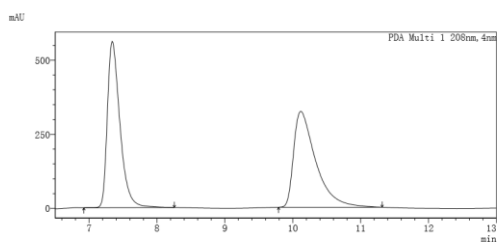

<Peak Results>  
PDA, Chl, 208nm

| Index | Time/min | Height/mAU | Quantity/Area | Area % |
|-------|----------|------------|---------------|--------|
| 1     | 7.341    | 561146     | 7234399       | 49.668 |
| 2     | 10.118   | 323311     | 7331102       | 50.332 |

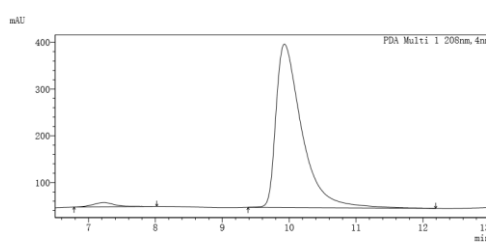

<Peak Results>  
PDA, Chl, 208nm

| Index | Time/min | Height/mAU | Quantity/Area | Area % |
|-------|----------|------------|---------------|--------|
| 1     | 7.229    | 9020       | 210211        | 2.188  |
| 2     | 9.930    | 34928      | 830351        | 97.812 |

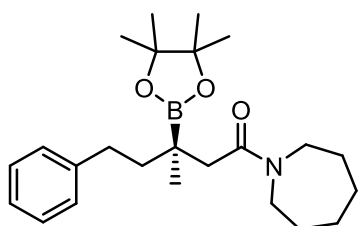

**product 3f:** Following the general procedure, amide **1f** (67.8 mg, 0.25 mmol) was converted to the boration product. Purification by silica gel chromatography gave 72.1

mg (65% yield) of **3f** as a white solid. TLC analysis (hexanes/EtOAc 1:1)  $R_f = 0.35$ ;  $^1\text{H}$  NMR (400 MHz,  $\text{CDCl}_3$ )  $\delta$  7.32 – 7.06 (m, 5H), 3.60 – 3.50 (m, 2H), 3.42 – 3.32 (m, 2H), 2.69 (td,  $J = 12.8, 5.0$  Hz, 1H), 2.62 – 2.47 (m, 2H), 2.27 (d,  $J = 16.7$  Hz, 1H), 1.79 – 1.47 (m, 10H), 1.23 (d,  $J = 7.1$  Hz, 12H), 1.04 (s, 3H).  $^{13}\text{C}$  NMR (101 MHz,  $\text{CDCl}_3$ )  $\delta$  175.5, 144.1, 128.6, 128.3, 125.4, 81.3, 48.2, 46.9, 44.4, 41.0, 32.0, 28.8, 27.3, 27.1, 27.0, 25.4, 25.3, 22.2. ESI-HR calcd for  $\text{C}_{24}\text{H}_{39}\text{BNO}_3^+$  ( $[\text{M}+\text{H}]^+$ ) 400.3018, found 400.3009. IR  $\nu$  ( $\text{cm}^{-1}$ ) 2927, 2863, 1632, 1145, 699. M. P. 75-77 °C.  $[\alpha]_D^{20} = +13.0$  ( $c = 0.67$ ,  $\text{CHCl}_3$ ) for a 95% *ee* sample. The enantiomeric purity of this compound was determined by HPLC analysis in comparison with authentic racemic material (Chiralpak OD, 99.5:0.5 hexanes:*i*-PrOH, 1.0 mL/min, 208 nm):  $t_{\text{major}} = 13.732$  min,  $t_{\text{minor}} = 9.480$  min.

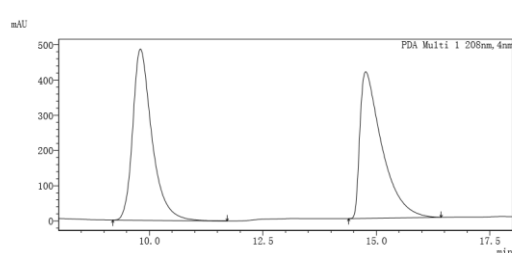

<Peak Results>  
PDA Chl 208nm

| Index | Time/min | Height/mAU | Quantity/Area | Area %/ |
|-------|----------|------------|---------------|---------|
| 1     | 9.480    | 486162     | 14303969      | 50.463  |
| 2     | 13.732   | 416235     | 14041285      | 49.537  |

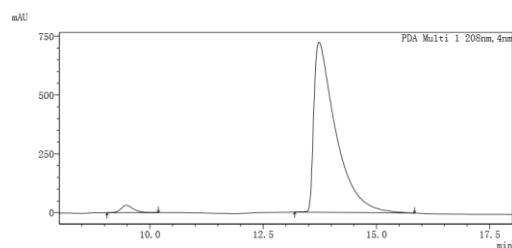

<Peak Results>  
PDA Chl 208nm

| Index | Time/min | Height/mAU | Quantity/Area | Area %/ |
|-------|----------|------------|---------------|---------|
| 1     | 9.480    | 31172      | 610269        | 2.449   |
| 2     | 13.732   | 723011     | 24304110      | 97.551  |

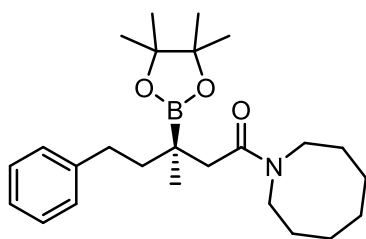

**product 3g**: Following the general procedure, amide **1g** (71.3 mg, 0.25 mmol) was converted to the boration product. Purification by silica gel chromatography gave 62.0 mg (60% yield) of **3g** as a white solid. TLC analysis (hexanes/EtOAc 11:1)  $R_f = 0.38$ ;  $^1\text{H}$  NMR (400 MHz,  $\text{CDCl}_3$ )  $\delta$  7.31 – 7.07 (m, 5), 3.48 (t,  $J = 6.0$  Hz, 2H), 3.34 (t,  $J = 5.8$  Hz, 2H), 2.69 (td,  $J = 12.8, 5.0$  Hz, 1H), 2.63 – 2.47 (m, 2H), 2.28 (d,  $J = 16.6$  Hz, 1H), 1.82 – 1.45 (m, 12H), 1.23 (d,  $J = 7.8$  Hz, 12H), 1.05 (s, 3H).  $^{13}\text{C}$  NMR (101 MHz,  $\text{CDCl}_3$ )  $\delta$  175.6, 144.1, 128.6, 128.3, 125.4, 81.2, 49.4, 48.0, 44.6, 40.8, 32.0, 26.9, 26.8, 25.8, 25.7, 25.4, 25.3, 24.9, 22.2. ESI-HR calcd for  $\text{C}_{25}\text{H}_{41}\text{BNO}_3^+$  ( $[\text{M}+\text{H}]^+$ ) 414.3174,

found 414.3163. **IR**  $\nu$  (cm<sup>-1</sup>) 2925, 1632, 1145, 699. **M. P.** 103-105 °C.  $[\alpha]_D^{20} = + 9.5$  ( $c = 0.42$ , CHCl<sub>3</sub>) for a 95% *ee* sample. The enantiomeric purity of this compound was determined by HPLC analysis in comparison with authentic racemic material (Chiralpak IC, 99.0:1.0 hexanes:*i*-PrOH, 0.5 mL/min, 208 nm):  $t_{\text{major}} = 22.021$  min,  $t_{\text{minor}} = 20.975$  min.

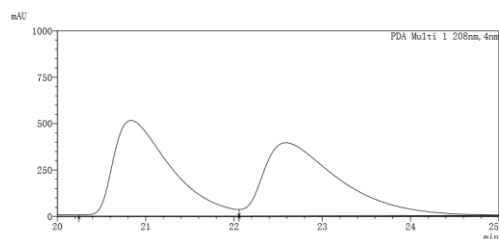

<Peak Results>

| Index | Time/min | Height/mAU | Quantity/Area | Area % |
|-------|----------|------------|---------------|--------|
| 1     | 20.835   | 516522     | 23360896      | 49.838 |
| 2     | 22.590   | 394188     | 23493999      | 50.142 |

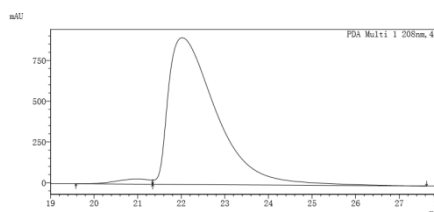

<Peak Results>

| Index | Time/min | Height/mAU | Quantity/Area | Area % |
|-------|----------|------------|---------------|--------|
| 1     | 20.975   | 31194      | 1641912       | 0.335  |
| 2     | 22.021   | 899699     | 68669125      | 97.665 |

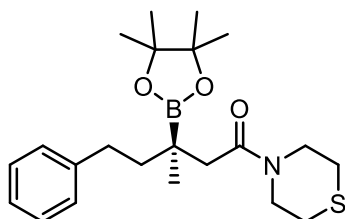

**product 3h:** Following the general procedure, amide **1h** (68.8 mg, 0.25 mmol) was converted to the boration product. Purification by silica gel chromatography gave 52.1 mg (52% yield) of **3h** as a white solid. TLC analysis (hexanes/EtOAc 3:1)  $R_f = 0.37$ ; **<sup>1</sup>H NMR** (400 MHz, CDCl<sub>3</sub>)  $\delta$  7.30 – 7.12 (m, 5H), 3.85 (dddd,  $J = 24.0, 13.5, 10.6, 5.1$  Hz, 2H), 3.68 (q,  $J = 4.9$  Hz, 2H), 2.73 – 2.55 (m, 6H), 2.48 (d,  $J = 16.4$  Hz, 1H), 2.21 (d,  $J = 16.4$  Hz, 1H), 1.74 (ddd,  $J = 13.3, 10.7, 6.4$  Hz, 1H), 1.58 (ddd,  $J = 13.4, 11.1, 6.7$  Hz, 1H), 1.26 (d,  $J = 10.2$  Hz, 12H), 1.06 (s, 3H). **<sup>13</sup>C NMR** (101 MHz, CDCl<sub>3</sub>)  $\delta$  172.1, 143.7, 128.5, 128.4, 125.6, 82.5, 48.2, 44.9, 44.2, 41.2, 32.0, 27.8, 27.6, 25.2, 25.1, 22.1. **ESI-HR** calcd for C<sub>22</sub>H<sub>35</sub>BNO<sub>3</sub>S<sup>+</sup> ( $[M+H]^+$ ) 404.2425, found 404.2416. **IR**  $\nu$  (cm<sup>-1</sup>) 2922, 1639, 1146, 700. **M. P.** 120-122 °C.  $[\alpha]_D^{20} = + 10.0$  ( $c = 1.33$ , CHCl<sub>3</sub>) for a 99% *ee* sample. The enantiomeric purity of this compound was determined by HPLC analysis in comparison with authentic racemic material (Chiralpak AD, 99.6:0.4 hexanes:*i*-PrOH, 1.0 mL/min, 208 nm):  $t_{\text{major}} = 15.877$  min,  $t_{\text{minor}} = 20.994$  min.

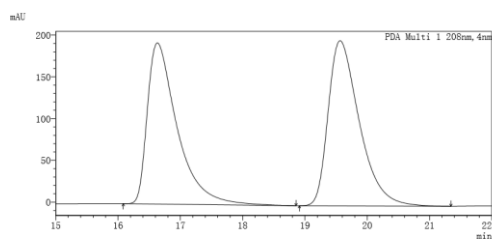

<Peak Results>

| PDA Chl 208nm |          |            |               |        |
|---------------|----------|------------|---------------|--------|
| Index         | Time/min | Height/mAU | Quantity/Area | Area % |
| 1             | 16.632   | 193035     | 6444118       | 48.359 |
| 2             | 19.565   | 197821     | 6881401       | 51.641 |

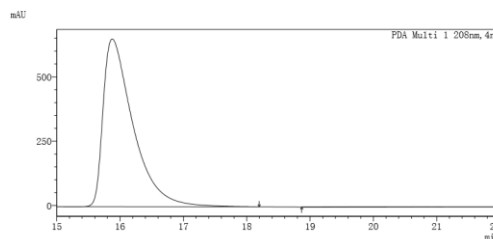

<Peak Results>

| PDA Chl 208nm |          |            |               |        |
|---------------|----------|------------|---------------|--------|
| Index         | Time/min | Height/mAU | Quantity/Area | Area % |
| 1             | 15.877   | 651537     | 21404696      | 99.613 |
| 2             | 20.994   | 587        | 63119         | 0.387  |

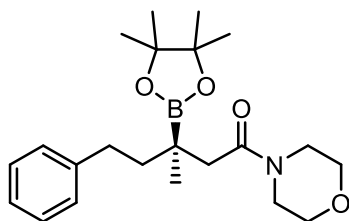

**product (S)-3i:** Following the general procedure, amide **1i** (64.8 mg, 0.25 mmol) was converted to the boration product. Purification by silica gel chromatography gave 62.7 mg (65% yield) of **(S)-3i** as a white solid. TLC analysis (hexanes/EtOAc 2:1)  $R_f = 0.23$ ;  $^1\text{H NMR}$  (400 MHz,  $\text{CDCl}_3$ )  $\delta$  7.29 – 7.12 (m, 5H), 3.71 – 3.54 (m, 6H), 3.41 (q,  $J = 4.8$  Hz, 2H), 2.63 (tt,  $J = 10.4, 7.3$  Hz, 2H), 2.49 (d,  $J = 16.4$  Hz, 1H), 2.23 (d,  $J = 16.4$  Hz, 1H), 1.74 (ddd,  $J = 13.3, 10.6, 6.5$  Hz, 1H), 1.62 – 1.54 (m, 1H), 1.27 (d,  $J = 9.8$  Hz, 12H), 1.06 (s, 3H).  $^{13}\text{C NMR}$  (101 MHz,  $\text{CDCl}_3$ )  $\delta$  172.2, 143.7, 128.5, 128.4, 125.6, 82.6, 67.0, 66.6, 45.9, 43.8, 42.4, 41.3, 32.0, 25.2, 25.1, 22.1. **ESI-HR** calcd for  $\text{C}_{22}\text{H}_{35}\text{BNO}_4^+$  ( $[\text{M}+\text{H}]^+$ ) 388.2654, found 388.2642. **IR**  $\nu$  ( $\text{cm}^{-1}$ ) 2970, 2856, 1638, 1114, 700. **M. P.** 130-132 °C.  $[\alpha]_D^{20} = +11.7$  ( $c = 0.42$ ,  $\text{CHCl}_3$ ) for a 92% *ee* sample. The enantiomeric purity of this compound was determined by HPLC analysis in comparison with authentic racemic material (Chiralpak AD, 99.0:1.0 hexanes:*i*-PrOH, 1.0 mL/min, 208 nm):  $t_{\text{major}} = 11.969$  min,  $t_{\text{minor}} = 9.958$  min.

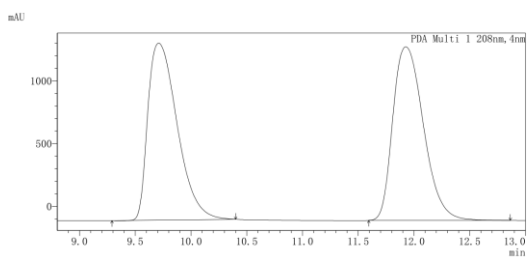

<Peak Results>

| PDA Chl 208nm |          |            |               |        |
|---------------|----------|------------|---------------|--------|
| Index         | Time/min | Height/mAU | Quantity/Area | Area % |
| 1             | 9.710    | 1409752    | 25786618      | 49.334 |
| 2             | 11.926   | 1383030    | 26483345      | 50.666 |

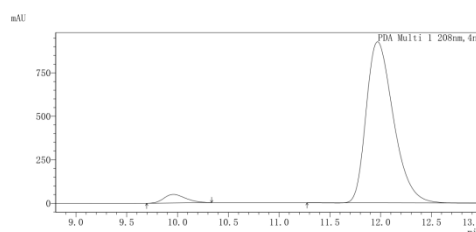

<Peak Results>

| PDA Chl 208nm |          |            |               |        |
|---------------|----------|------------|---------------|--------|
| Index         | Time/min | Height/mAU | Quantity/Area | Area % |
| 1             | 9.958    | 49722      | 741617        | 4.123  |
| 2             | 11.969   | 927042     | 17243549      | 95.877 |

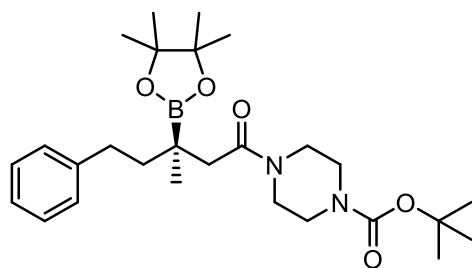

**product 3j:** Following the general procedure, amide **1j** (89.5 mg, 0.25 mmol) was converted to the boration product. Purification by silica gel chromatography gave 85.5 mg (70% yield) of **3j** as a white solid. TLC analysis (hexanes/EtOAc 2:1)  $R_f = 0.32$ ;  $^1\text{H NMR}$  (400 MHz,  $\text{CDCl}_3$ )  $\delta$  7.29 – 7.22 (m, 2H), 7.21 – 7.11 (m, 3H), 3.57 (q,  $J = 5.8$  Hz, 2H), 3.39 (dt,  $J = 11.0, 6.0$  Hz, 6H), 2.63 (tt,  $J = 10.3, 7.4$  Hz, 2H), 2.51 (d,  $J = 16.4$  Hz, 1H), 2.24 (d,  $J = 16.4$  Hz, 1H), 1.74 (ddd,  $J = 13.4, 10.6, 6.5$  Hz, 1H), 1.58 (ddd,  $J = 13.3, 10.9, 6.8$  Hz, 1H), 1.47 (s, 9H), 1.26 (d,  $J = 10.2$  Hz, 12H), 1.06 (s, 3H).  $^{13}\text{C NMR}$  (101 MHz,  $\text{CDCl}_3$ )  $\delta$  172.2, 154.7, 143.6, 128.5, 128.4, 125.6, 82.6, 80.4, 45.3, 44.0, 41.9, 41.2, 32.0, 28.5, 25.2, 25.1, 22.1. **ESI-HR** calcd for  $\text{C}_{27}\text{H}_{44}\text{BN}_2\text{O}_5^+$  ( $[\text{M}+\text{H}]^+$ ) 487.3338, found 487.3338. **IR**  $\nu$  ( $\text{cm}^{-1}$ ) 2975, 2929, 1644, 1147, 707. **M. P.** 136-138  $^\circ\text{C}$ .  $[\alpha]_{\text{D}}^{20} = +13.2$  ( $c = 0.65$ ,  $\text{CHCl}_3$ ) for a 92% *ee* sample. The enantiomeric purity of this compound was determined by HPLC analysis in comparison with authentic racemic material (Chiralpak AD, 98.0:2.0 hexanes:*i*-PrOH, 1.0 mL/min, 208 nm):  $t_{\text{major}} = 10.235$  min,  $t_{\text{minor}} = 11.583$  min.

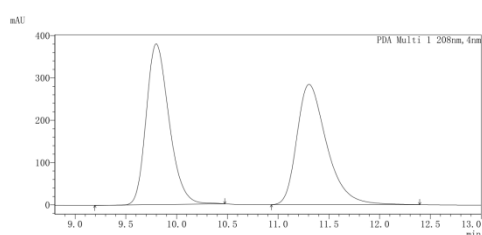

<Peak Results>

| Index | Time/min | Height/mAU | Quantity/Area | Area %/% |
|-------|----------|------------|---------------|----------|
| 1     | 9.799    | 379738     | 5945787       | 50.554   |
| 2     | 11.304   | 284338     | 5815386       | 49.446   |

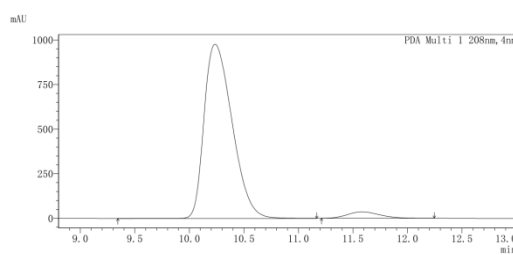

<Peak Results>

| Index | Time/min | Height/mAU | Quantity/Area | Area %/% |
|-------|----------|------------|---------------|----------|
| 1     | 10.235   | 976246     | 17477196      | 95.990   |
| 2     | 11.583   | 35681      | 730152        | 4.010    |

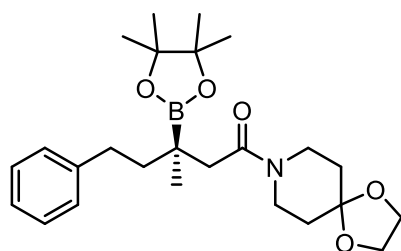

**product 3k:** Following the general procedure, amide **1k** (78.8 mg, 0.25 mmol) was converted to the boration product. Purification by silica gel chromatography gave 95.2 mg (86% yield) of **3k** as a white solid. TLC analysis (hexanes/EtOAc 3:1)  $R_f = 0.23$ ;  $^1\text{H NMR}$  (400 MHz,  $\text{CDCl}_3$ )  $\delta$  7.30 – 7.11 (m, 5H), 3.97 (s, 4H), 3.70 (ddt,  $J = 25.3, 13.4, 6.4$  Hz, 2H), 3.49 (q,  $J = 5.8$  Hz, 2H), 2.69 – 2.46 (m, 3H), 2.27 (d,  $J = 16.4$  Hz, 1H), 1.76 – 1.54 (m, 6H), 1.25 (d,  $J = 9.2$  Hz, 12H), 1.05 (s, 3H).  $^{13}\text{C NMR}$  (101 MHz,  $\text{CDCl}_3$ )  $\delta$  172.7, 143.8, 128.5, 128.3, 125.6, 106.8, 82.0, 64.6, 44.0, 43.6, 41.2, 40.7, 35.5, 34.9, 32.0, 25.3, 25.2, 22.2. **ESI-HR** calcd for  $\text{C}_{25}\text{H}_{39}\text{BNO}_5^+$  ( $[\text{M}+\text{H}]^+$ ) 444.2916, found 444.2903. **IR**  $\nu$  ( $\text{cm}^{-1}$ ) 3445, 3025, 2971, 2929, 1632, 1032, 699. **M. P.** 105-108  $^\circ\text{C}$ .  $[\alpha]_{\text{D}}^{20} = +16.7$  ( $c = 0.42, \text{CHCl}_3$ ) for a 93% *ee* sample. The enantiomeric purity of this compound was determined by HPLC analysis in comparison with authentic racemic material (Chiralpak OD, 99.0:1.0 hexanes:*i*-PrOH, 1.0 mL/min, 208 nm):  $t_{\text{major}} = 19.564$  min,  $t_{\text{minor}} = 17.486$  min.

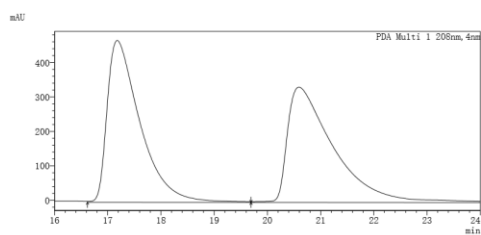

<Peak Results>

| Index | Time/min | Height/mAU | Quantity/Area | Area %/% |
|-------|----------|------------|---------------|----------|
| 1     | 17.486   | 469559     | 20194312      | 49.963   |
| 2     | 19.564   | 334608     | 20224077      | 50.037   |

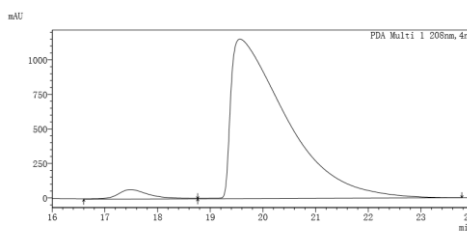

<Peak Results>

| Index | Time/min | Height/mAU | Quantity/Area | Area %/% |
|-------|----------|------------|---------------|----------|
| 1     | 17.486   | 43222      | 2988485       | 3.269    |
| 2     | 19.564   | 1155503    | 84875711      | 96.731   |

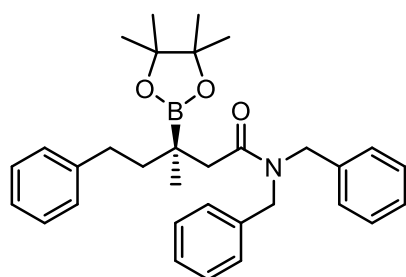

**product 3l:** Following the general procedure, amide **1l** (92.3 mg, 0.25 mmol) was converted to the boration product. Purification by silica gel chromatography gave 115.9 mg (93% yield) of **3l** as a white solid. TLC analysis (hexanes/EtOAc 4:1)  $R_f = 0.52$ ;  $^1\text{H NMR}$  (400 MHz,  $\text{CDCl}_3$ )  $\delta$  7.38 – 7.18 (m, 10H), 7.17 – 7.10 (m, 5H), 4.81 (d,  $J = 14.7$  Hz, 1H), 4.44 (d,  $J = 17.1$  Hz, 1H), 4.35 – 4.28 (m, 2H), 2.68 (d,  $J = 16.6$  Hz, 1H), 2.59 (dq,  $J = 12.7, 7.5, 6.3$  Hz, 2H), 2.36 (d,  $J = 16.5$  Hz, 1H), 1.82 – 1.70 (m, 1H), 1.59

(ddd,  $J = 13.4, 11.3, 6.5$  Hz, 1H), 1.31 (d,  $J = 8.2$  Hz, 12H), 1.12 (s, 3H).  $^{13}\text{C}$  NMR (101 MHz,  $\text{CDCl}_3$ )  $\delta$  174.1, 143.7, 137.3, 136.3, 129.1, 128.6, 128.5, 128.5, 128.3, 127.8, 127.5, 126.6, 125.6, 82.6, 49.7, 48.4, 44.3, 41.1, 31.9, 25.3, 25.2, 21.8. **ESI-HR** calcd for  $\text{C}_{32}\text{H}_{41}\text{BNO}_3^+$  ( $[\text{M}+\text{H}]^+$ ) 498.3174, found 498.3166. **IR**  $\nu$  ( $\text{cm}^{-1}$ ) 2973, 2927, 1642, 1145, 698. **M. P.** 119-121 °C.  $[\alpha]_{\text{D}}^{20} = +44.7$  ( $c = 0.54$ ,  $\text{CHCl}_3$ ) for a 95% *ee* sample. The enantiomeric purity of this compound was determined by HPLC analysis in comparison with authentic racemic material (Chiralpak AD, 99.0:1.0 hexanes:*i*-PrOH, 1.0 mL/min, 208 nm):  $t_{\text{major}} = 13.156$  min,  $t_{\text{minor}} = 11.542$  min.

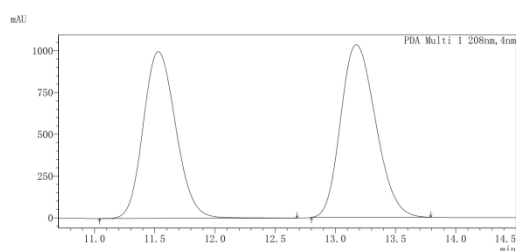

<Peak Results>  
PDA Chl 208nm

| Index | Time/min | Height/mAU | Quantity/Area | Area %/% |
|-------|----------|------------|---------------|----------|
| 1     | 11.529   | 997451     | 18836650      | 47.381   |
| 2     | 13.173   | 1033939    | 20919007      | 52.619   |

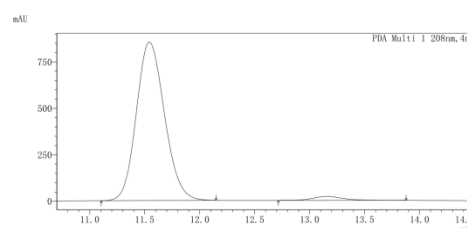

<Peak Results>  
PDA Chl 208nm

| Index | Time/min | Height/mAU | Quantity/Area | Area %/% |
|-------|----------|------------|---------------|----------|
| 1     | 11.542   | 853045     | 15200957      | 97.467   |
| 2     | 13.156   | 20571      | 395058        | 2.533    |

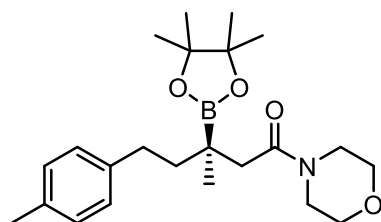

**product 3m:** Following the general procedure, amide **1m** (68.3 mg, 0.25 mmol) was converted to the boration product. Purification by silica gel chromatography gave 77.9 mg (77% yield) of **3m** as a white solid. TLC analysis (hexanes/EtOAc 1:1)  $R_f = 0.28$ ;  $^1\text{H}$  NMR (400 MHz,  $\text{CDCl}_3$ )  $\delta$  7.07 (s, 4H), 3.71 – 3.56 (m, 6H), 3.42 (m,  $J = 5.1$  Hz, 2H), 2.59 (ddd,  $J = 9.9, 6.1, 2.4$  Hz, 2H), 2.49 (d,  $J = 16.4$  Hz, 1H), 2.31 (s, 3H), 2.22 (d,  $J = 16.4$  Hz, 1H), 1.71 (ddd,  $J = 13.3, 10.3, 7.0$  Hz, 1H), 1.55 (ddd,  $J = 13.3, 10.8, 7.0$  Hz, 1H), 1.26 (d,  $J = 10.6$  Hz, 12H), 1.06 (s, 3H).  $^{13}\text{C}$  NMR (101 MHz,  $\text{CDCl}_3$ )  $\delta$  172.2, 140.5, 135.1, 129.1, 128.4, 82.5, 67.0, 66.6, 45.9, 43.8, 42.4, 41.5, 31.5, 25.2, 25.1, 22.1, 21.1. **ESI-HR** calcd for  $\text{C}_{23}\text{H}_{37}\text{BNO}_4^+$  ( $[\text{M}+\text{H}]^+$ ) 402.2810, found 402.2797. **IR**  $\nu$  ( $\text{cm}^{-1}$ ) 2972, 2924, 2858, 1643, 1147, 858. **M. P.** 131-133 °C.  $[\alpha]_{\text{D}}^{20} = +10.0$  ( $c = 0.45$ ,  $\text{CHCl}_3$ ) for a 97% *ee* sample. The enantiomeric purity of this compound was determined

by HPLC analysis in comparison with authentic racemic material (Chiralpak OD, 99.0:1.0 hexanes:*i*-PrOH, 1.0 mL/min, 208 nm):  $t_{\text{major}} = 13.718$  min,  $t_{\text{minor}} = 11.815$  min.

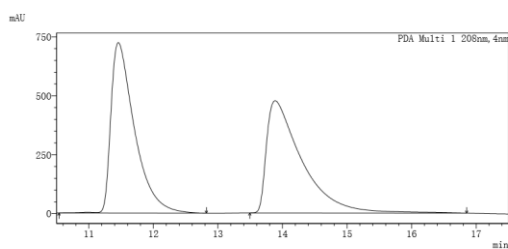

<Peak Results>

| Index | Time/min | Height/mAU | Quantity/Area | Area % |
|-------|----------|------------|---------------|--------|
| 1     | 11.457   | 723176     | 18374699      | 50.365 |
| 2     | 13.886   | 476050     | 18108072      | 49.635 |

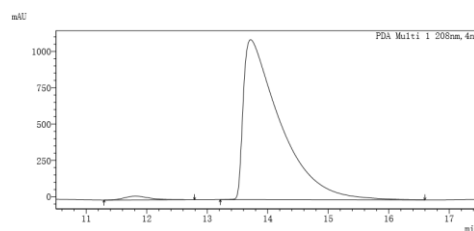

<Peak Results>

| Index | Time/min | Height/mAU | Quantity/Area | Area % |
|-------|----------|------------|---------------|--------|
| 1     | 11.815   | 25383      | 720991        | 1.545  |
| 2     | 13.718   | 1100407    | 46722259      | 98.455 |

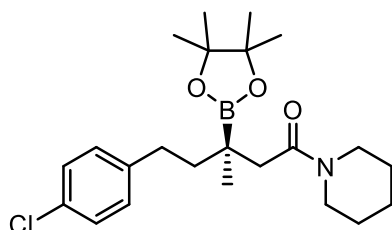

**product 3n:** Following the general procedure, amide **1n** (72.9 mg, 0.25 mmol) was converted to the boration product. Purification by silica gel chromatography gave 65.5 mg (62% yield) of **3n** as a white solid. TLC analysis (hexanes/EtOAc 2:1)  $R_f = 0.25$ ;  $^1\text{H NMR}$  (400 MHz,  $\text{CDCl}_3$ )  $\delta$  7.23 (d,  $J = 8.0$  Hz, 2H), 7.13 (d,  $J = 8.0$  Hz, 2H), 3.59 (q,  $J = 5.8$  Hz, 2H), 3.38 (q,  $J = 4.9$  Hz, 2H), 2.69 (td,  $J = 12.9, 4.9$  Hz, 1H), 2.63 – 2.43 (m, 2H), 2.30 (d,  $J = 16.6$  Hz, 1H), 1.63 (ddt,  $J = 41.2, 12.9, 5.9$  Hz, 8H), 1.25 (d,  $J = 5.3$  Hz, 12H), 1.04 (s, 3H).  $^{13}\text{C NMR}$  (101 MHz,  $\text{CDCl}_3$ )  $\delta$  173.9, 142.6, 131.1, 129.9, 128.4, 81.3, 46.8, 44.2, 41.1, 31.5, 26.3, 25.6, 25.4, 25.3, 24.3, 22.4. **ESI-HR** calcd for  $\text{C}_{23}\text{H}_{36}\text{BClINO}_3^+$  ( $[\text{M}+\text{H}]^+$ ) 420.2471, found 420.2464. **IR**  $\nu$  ( $\text{cm}^{-1}$ ) 3417, 2976, 2939, 1617, 1138, 884. **M. P.** 96-98 °C.  $[\alpha]_{\text{D}}^{20} = +11.8$  ( $c = 0.47$ ,  $\text{CHCl}_3$ ) for a 95% *ee* sample. The enantiomeric purity of this compound was determined by HPLC analysis in comparison with authentic racemic material (Chiralpak AD, 99.6:0.4 hexanes:*i*-PrOH, 1.0 mL/min, 208 nm):  $t_{\text{major}} = 10.490$  min,  $t_{\text{minor}} = 13.102$  min. Single crystal suitable for X-ray analysis was obtained through slow diffusion of hexane into a solution of **3n** in dichloromethane (CCDC number 2031005).



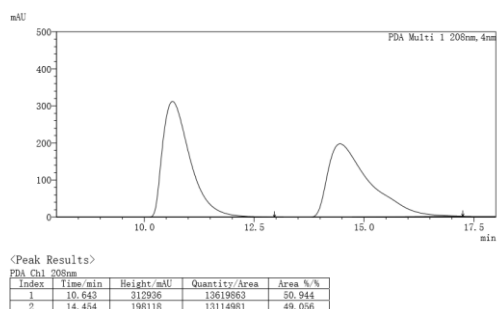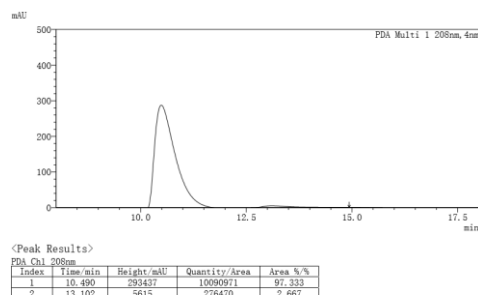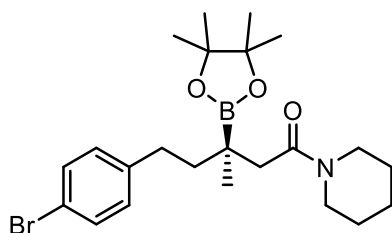

**product 3o:** Following the general procedure, amide **1o** (83.8 mg, 0.25 mmol) was converted to the boration product. Purification by silica gel chromatography gave 72.1 mg (62% yield) of **3o** as a white solid. TLC analysis (hexanes/EtOAc 2:1)  $R_f = 0.27$ ; **<sup>1</sup>H NMR** (400 MHz, CDCl<sub>3</sub>)  $\delta$  7.43 – 7.28 (m, 2H), 7.15 – 6.99 (m, 2H), 3.57 (q,  $J = 5.7$  Hz, 2H), 3.35 (q,  $J = 5.0$  Hz, 2H), 2.66 (td,  $J = 12.9, 4.8$  Hz, 1H), 2.53 (dt,  $J = 13.0, 6.5$  Hz, 1H), 2.47 (d,  $J = 16.7$  Hz, 1H), 2.28 (d,  $J = 16.7$  Hz, 1H), 1.76 – 1.47 (m, 8H), 1.22 (d,  $J = 5.1$  Hz, 12H), 1.02 (s, 3H). **<sup>13</sup>C NMR** (101 MHz, CDCl<sub>3</sub>)  $\delta$  173.9, 143.1, 131.3, 130.4, 119.1, 81.3, 46.8, 44.2, 41.1, 31.5, 26.3, 25.6, 25.4, 25.3, 24.3, 22.4. **ESI-HR** calcd for C<sub>23</sub>H<sub>36</sub>BBrNO<sub>3</sub><sup>+</sup> ([M+H]<sup>+</sup>) 464.1966, found 464.1954. **IR**  $\nu$  (cm<sup>-1</sup>) 3416, 2975, 2937, 1616, 1139, 855. **M. P.** 93-95 °C.  $[\alpha]_D^{20} = +10.9$  ( $c = 0.46$ , CHCl<sub>3</sub>) for a 99% *ee* sample. The enantiomeric purity of this compound was determined by HPLC analysis in comparison with authentic racemic material (Chiralpak AD, 99.5:0.5 hexanes:*i*-PrOH, 1.0 mL/min, 208 nm):  $t_{\text{major}} = 9.068$  min,  $t_{\text{minor}} = 11.668$  min. Single crystal suitable for X-ray analysis was obtained through slow diffusion of hexane into a solution of **3o** in dichloromethane (CCDC number 2031762).

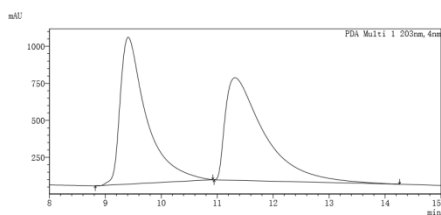

<Peak Results>  
PDA Chl 203nm

| Index | Time/min | Height/mAU | Quantity/Area | Area % |
|-------|----------|------------|---------------|--------|
| 1     | 9.409    | 991784     | 3353784       | 49.248 |
| 2     | 11.319   | 692675     | 33551575      | 90.752 |

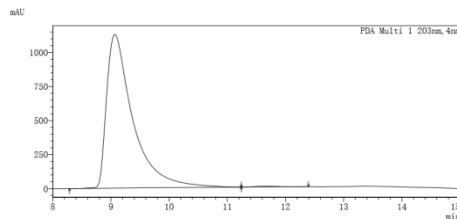

<Peak Results>  
PDA Chl 203nm

| Index | Time/min | Height/mAU | Quantity/Area | Area % |
|-------|----------|------------|---------------|--------|
| 1     | 9.098    | 1120349    | 3350251       | 99.569 |
| 2     | 11.668   | 4546       | 153871        | 0.431  |

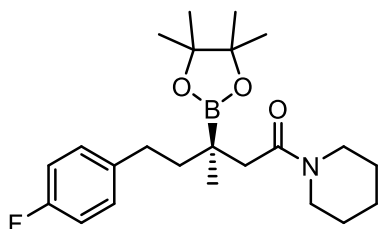

**product 3p:** Following the general procedure, amide **1p** (68.8 mg, 0.25 mmol) was converted to the boration product. Purification by silica gel chromatography gave 66.5 mg (66% yield) of **3p** as a white solid. TLC analysis (hexanes/EtOAc 2:1)  $R_f = 0.36$ ; **<sup>1</sup>H NMR** (400 MHz, CDCl<sub>3</sub>)  $\delta$  7.16 – 7.09 (m, 2H), 6.97 – 6.88 (m, 2H), 3.58 (ddt,  $J = 15.9, 13.2, 6.6$  Hz, 2H), 3.36 (q,  $J = 5.1$  Hz, 2H), 2.67 (td,  $J = 12.9, 4.9$  Hz, 1H), 2.55 (dt,  $J = 13.1, 6.6$  Hz, 1H), 2.48 (d,  $J = 16.6$  Hz, 1H), 2.27 (d,  $J = 16.7$  Hz, 1H), 1.74 – 1.48 (m, 8H), 1.23 (d,  $J = 5.7$  Hz, 12H), 1.02 (s, 3H). **<sup>13</sup>C NMR**  $\delta$  173.9, 161.2( $J_1 = 242.1$  Hz), 139.7( $J_4 = 3.0$  Hz), 129.8( $J_3 = 7.8$  Hz), 115.0( $J_2 = 21.2$  Hz), 81.3, 46.8, 44.2, 41.3, 31.3, 26.3, 25.6, 25.4, 25.3, 24.3, 22.4. **<sup>19</sup>F NMR** (376 MHz, CDCl<sub>3</sub>)  $\delta$  -118.6. **ESI-HR** calcd for C<sub>23</sub>H<sub>36</sub>BFNO<sub>3</sub><sup>+</sup> ([M+H]<sup>+</sup>) 404.2767, found 404.2764. **IR**  $\nu$  (cm<sup>-1</sup>) 3425, 2974, 2937, 1618, 1140, 856. **M. P.** 55-58 °C.  $[\alpha]_D^{20} = +11.4$  ( $c = 0.47$ , CHCl<sub>3</sub>) for a 98% *ee* sample. The enantiomeric purity of this compound was determined by HPLC analysis in comparison with authentic racemic material (Chiralpak AD, 99.6:0.4 hexanes:*i*-PrOH, 1.0 mL/min, 208 nm):  $t_{\text{major}} = 10.063$  min,  $t_{\text{minor}} = 13.392$  min.

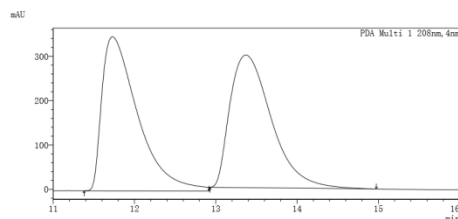

<Peak Results>  
PDA Chl 208nm

| Index | Time/min | Height/mAU | Quantity/Area | Area % |
|-------|----------|------------|---------------|--------|
| 1     | 11.720   | 247462     | 10676911      | 50.184 |
| 2     | 13.370   | 298783     | 10598417      | 49.816 |

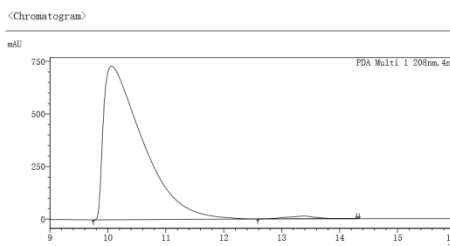

<Peak Results>  
PDA Chl 208nm

| Index | Time/min | Height/mAU | Quantity/Area | Area % |
|-------|----------|------------|---------------|--------|
| 1     | 10.063   | 729600     | 34579154      | 98.757 |
| 2     | 13.392   | 12292      | 435330        | 1.243  |

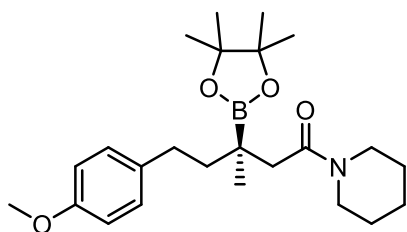

**product 3q:** Following the general procedure, amide **1q** (71.8 mg, 0.25 mmol) was converted to the boration product. Purification by silica gel chromatography gave 70.7 mg (68% yield) of **3q** as a white solid. TLC analysis (hexanes/EtOAc 3:2)  $R_f = 0.31$ ;  $^1\text{H NMR}$  (400 MHz,  $\text{CDCl}_3$ )  $\delta$  7.14 – 7.06 (m, 2H), 6.84 – 6.78 (m, 2H), 3.77 (s, 3H), 3.61 – 3.50 (m, 2H), 3.35 (q,  $J = 5.6$  Hz, 2H), 2.63 (td,  $J = 12.8, 4.9$  Hz, 1H), 2.57 – 2.39 (m, 2H), 2.26 (d,  $J = 16.6$  Hz, 1H), 1.73 – 1.47 (m, 8H), 1.23 (d,  $J = 6.9$  Hz, 12H), 1.02 (s, 3H).  $^{13}\text{C NMR}$  (101 MHz,  $\text{CDCl}_3$ )  $\delta$  173.8, 157.6, 136.2, 129.3, 129.3, 113.8, 113.7, 81.3, 55.4, 46.8, 44.1, 41.3, 31.0, 26.2, 25.6, 25.4, 25.3, 24.3, 22.4. **ESI-HR** calcd for  $\text{C}_{24}\text{H}_{39}\text{BNO}_4^+$  ( $[\text{M}+\text{H}]^+$ ) 416.2967, found 416.2957. **IR**  $\nu$  ( $\text{cm}^{-1}$ ) 3418, 2935, 1613, 1139, 855, 667. **M. P.** 82-85 °C.  $[\alpha]_D^{20} = +16.4$  ( $c = 0.53$ ,  $\text{CHCl}_3$ ) for a 94% *ee* sample. The enantiomeric purity of this compound was determined by HPLC analysis in comparison with authentic racemic material (Chiralpak AD, 99.0:1.0 hexanes:*i*-PrOH, 1.0 mL/min, 208 nm):  $t_{\text{major}} = 9.745$  min,  $t_{\text{minor}} = 10.816$  min.

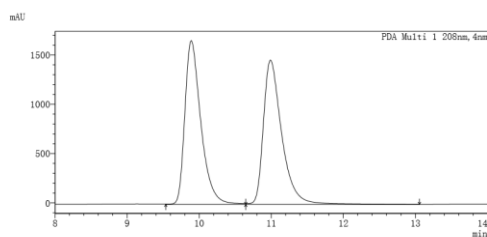

<Peak Results>  
PDA Chl 208nm

| Index | Time/min | Height/mAU | Quantity/Area | Area % |
|-------|----------|------------|---------------|--------|
| 1     | 9.889    | 1661052    | 28639704      | 49.690 |
| 2     | 10.988   | 1463530    | 25939604      | 50.310 |

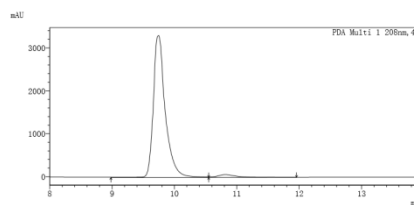

<Peak Results>  
PDA Chl 208nm

| Index | Time/min | Height/mAU | Quantity/Area | Area % |
|-------|----------|------------|---------------|--------|
| 1     | 9.745    | 2302632    | 44059447      | 96.544 |
| 2     | 10.816   | 63961      | 1236256       | 3.136  |

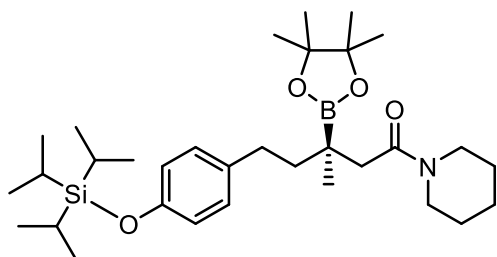

**product 3r:** Following the general procedure, amide **1r** (107.3 mg, 0.25 mmol) was converted to the boration product. Purification by silica gel chromatography gave 95.0 mg (68% yield) of **3r** as a colorless oil. TLC analysis (hexanes/EtOAc 4:1)  $R_f = 0.24$ ;  $^1\text{H NMR}$  (400 MHz,  $\text{CDCl}_3$ )  $\delta$  7.01 (d,  $J = 8.3$  Hz, 2H), 6.81 – 6.71 (m, 2H), 3.57 (ddq,  $J = 19.5, 13.2, 7.5, 6.5$  Hz, 2H), 3.35 (q,  $J = 5.9$  Hz, 2H), 2.69 – 2.44 (m, 3H), 2.25 (d,  $J = 16.6$  Hz, 1H), 1.73 – 1.50 (m, 8H), 1.23 (m,  $J = 6.8$  Hz, 15H), 1.09 (d,  $J = 7.2$  Hz, 18H), 1.02 (s, 3H).  $^{13}\text{C NMR}$  (101 MHz,  $\text{CDCl}_3$ )  $\delta$  173.9, 153.8, 136.4, 129.2, 119.6, 81.3, 46.8, 44.1, 41.1, 31.1, 26.2, 25.6, 25.4, 25.3, 24.3, 22.3, 18.1, 12.8.  $\text{IR}$   $\nu$  ( $\text{cm}^{-1}$ ) 2945, 2865, 1633, 1254, 1140, 882, 678. **ESI-HR** calcd for  $\text{C}_{32}\text{H}_{57}\text{BNO}_4\text{Si}^+$  ( $[\text{M}+\text{H}]^+$ ) 558.4144, found 558.4139.  $[\alpha]_D^{20} = +12.8$  ( $c = 0.56$ ,  $\text{CHCl}_3$ ) for a 96% *ee* sample. The enantiomeric purity of this compound was determined by HPLC analysis in comparison with authentic racemic material (Chiralpak AD, 99.7:0.3 hexanes:*i*-PrOH, 1.0 mL/min, 208 nm):  $t_{\text{major}} = 7.397$  min,  $t_{\text{minor}} = 9.269$  min.

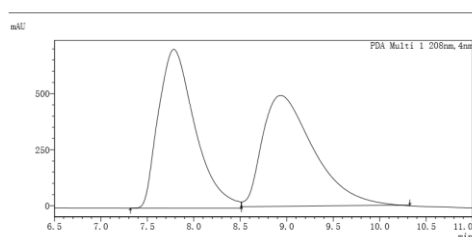

<Peak Results>

| Index | Time/min | Height/mAU | Quantity/Area | Area % |
|-------|----------|------------|---------------|--------|
| 1     | 7.397    | 708116     | 1943764       | 50.623 |
| 2     | 9.269    | 494646     | 1395318       | 49.377 |

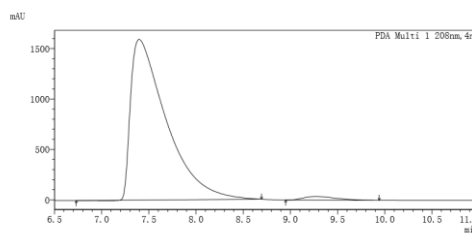

<Peak Results>

| Index | Time/min | Height/mAU | Quantity/Area | Area % |
|-------|----------|------------|---------------|--------|
| 1     | 7.297    | 1324597    | 41991223      | 97.987 |
| 2     | 9.269    | 36705      | 871258        | 2.013  |

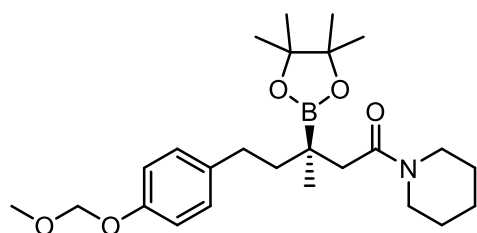

**product 3s:** Following the general procedure, amide **1s** (79.3 mg, 0.25 mmol) was converted to the boration product. Purification by silica gel chromatography gave 93.5 mg (83% yield) of **3s** as a colorless oil. TLC analysis (hexanes/EtOAc 3:1)  $R_f = 0.18$ ;  $^1\text{H NMR}$  (400 MHz,  $\text{CDCl}_3$ )  $\delta$  7.15 – 7.08 (m, 2H), 6.99 – 6.89 (m, 2H), 5.14 (s, 2H), 3.58 (ddt,  $J = 17.1, 11.5, 5.6$  Hz, 2H), 3.47 (s, 3H), 3.36 (td,  $J = 13.6, 7.8$  Hz, 2H), 2.64 (td,  $J = 12.8, 4.9$  Hz, 1H), 2.58 – 2.44 (m, 2H), 2.26 (d,  $J = 16.6$  Hz, 1H), 1.72 – 1.52 (m, 8H), 1.23 (d,  $J = 6.8$  Hz, 12H), 1.02 (s, 3H).  $^{13}\text{C NMR}$  (101 MHz,  $\text{CDCl}_3$ )  $\delta$  174.0,

155.2, 137.6, 129.4, 116.3, 94.8, 81.3, 56.0, 46.8, 44.1, 41.3, 31.2, 26.2, 25.6, 25.4, 25.3, 24.3, 22.4. **ESI-HR** calcd for  $C_{25}H_{41}BNO_5^+$  ( $[M+H]^+$ ) 446.3072, found 446.3058. **IR**  $\nu$  ( $cm^{-1}$ ) 3418, 2935, 1614, 1150, 885, 669.  $[\alpha]_D^{20} = +12.7$  ( $c = 0.66$ ,  $CHCl_3$ ) for a 96% *ee* sample. The enantiomeric purity of this compound was determined by HPLC analysis in comparison with authentic racemic material (Chiralpak AD, 99.0:1.0 hexanes:*i*-PrOH, 1.0 mL/min, 208 nm):  $t_{major} = 11.945$  min,  $t_{minor} = 13.450$  min.

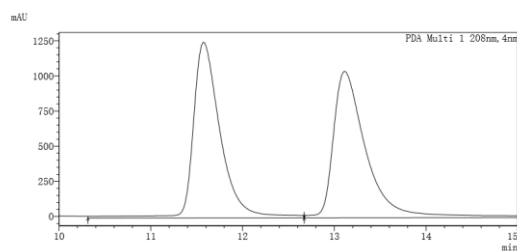

<Peak Results>

PDA Chl 208nm

| Index | Time/min | Height/mAU | Quantity/Area | Area % |
|-------|----------|------------|---------------|--------|
| 1     | 11.945   | 1248824    | 25762400      | 49.705 |
| 2     | 13.115   | 1040842    | 2606061       | 50.295 |

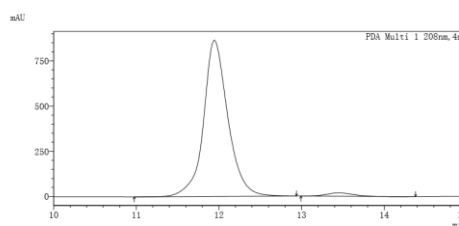

<Peak Results>

PDA Chl 208nm

| Index | Time/min | Height/mAU | Quantity/Area | Area % |
|-------|----------|------------|---------------|--------|
| 1     | 11.945   | 863258     | 17701572      | 97.850 |
| 2     | 13.450   | 18696      | 388957        | 2.150  |

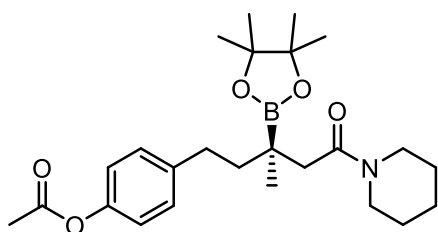

**Product 3t:** Following the general procedure, amide **1t** (78.8 mg, 0.25 mmol) was converted to the boration product. Purification by silica gel chromatography gave 74.0 mg (67% yield) of **3t** as a colorless oil. TLC analysis (hexanes/EtOAc 1:1)  $R_f = 0.35$ ; **<sup>1</sup>H NMR** (400 MHz,  $CDCl_3$ )  $\delta$  7.19 (d,  $J = 8.2$  Hz, 2H), 7.03 – 6.90 (m, 2H), 3.58 (tq,  $J = 13.2, 7.5, 6.5$  Hz, 2H), 3.35 (q,  $J = 5.3$  Hz, 2H), 2.70 (td,  $J = 12.9, 4.8$  Hz, 1H), 2.57 (td,  $J = 12.8, 5.4$  Hz, 1H), 2.47 (d,  $J = 16.7$  Hz, 1H), 2.28 (s, 4H), 1.76 – 1.47 (m, 8H), 1.23 (d,  $J = 6.2$  Hz, 12H), 1.02 (s, 3H). **<sup>13</sup>C NMR** (101 MHz,  $CDCl_3$ )  $\delta$  174.0, 169.9, 148.5, 141.7, 129.4, 121.3, 81.2, 46.8, 44.2, 44.1, 41.0, 31.4, 26.2, 25.6, 25.4, 25.3, 24.3, 22.4, 21.3. **ESI-HR** calcd for  $C_{25}H_{39}BNO_5^+$  ( $[M+H]^+$ ) 444.2916, found 444.2907. **IR**  $\nu$  ( $cm^{-1}$ ) 2937, 2858, 1758, 1629, 1215, 1133, 732. **M. P.** 112-114 °C.  $[\alpha]_D^{20} = +8.6$  ( $c = 0.63$ ,  $CHCl_3$ ) for a 98% *ee* sample. The enantiomeric purity of this compound was determined by HPLC analysis in comparison with authentic racemic material

(Chiralpak OD, 99.2:0.8 hexanes:*i*-PrOH, 1.0 mL/min, 208 nm):  $t_{\text{major}} = 19.192$  min,  $t_{\text{minor}} = 16.994$  min.

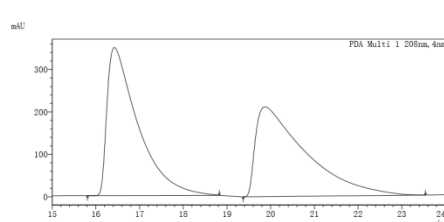

<Peak Results>

| Index | Time/min | Height/mAU | Quantity/Area | Area % |
|-------|----------|------------|---------------|--------|
| 1     | 16.994   | 348585     | 17094390      | 50.408 |
| 2     | 19.192   | 211203     | 10517543      | 49.592 |

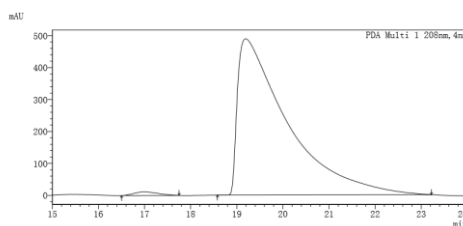

<Peak Results>

| Index | Time/min | Height/mAU | Quantity/Area | Area % |
|-------|----------|------------|---------------|--------|
| 1     | 16.994   | 11109      | 496794        | 1.092  |
| 2     | 19.192   | 489279     | 38804494      | 98.908 |

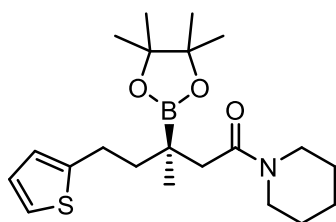

**product 3u:** Following the general procedure, amide **1u** (65.8 mg, 0.25 mmol) was converted to the boration product. Purification by silica gel chromatography gave 68.4 mg (70% yield) of **3u** as a white solid. TLC analysis (hexanes/EtOAc 2:1)  $R_f = 0.30$ ;  $^1\text{H NMR}$  (400 MHz,  $\text{CDCl}_3$ )  $\delta$  7.07 (dd,  $J = 5.0, 1.1$  Hz, 1H), 6.96 – 6.84 (m, 1H), 6.78 (d,  $J = 3.4$  Hz, 1H), 3.57 (qt,  $J = 12.7, 5.4$  Hz, 2H), 3.35 (q,  $J = 5.4$  Hz, 2H), 2.86 (dtd,  $J = 24.5, 18.3, 12.7, 12.3, 5.2$  Hz, 2H), 2.49 (d,  $J = 16.7$  Hz, 1H), 2.27 (d,  $J = 16.7$  Hz, 1H), 1.85 – 1.49 (m, 8H), 1.23 (d,  $J = 5.5$  Hz, 12H), 1.01 (s, 3H).  $^{13}\text{C NMR}$  (101 MHz,  $\text{CDCl}_3$ )  $\delta$  174.1, 147.2, 126.7, 123.7, 122.6, 81.2, 46.8, 44.2, 44.0, 41.1, 26.2, 26.1, 25.6, 25.3, 25.3, 24.3, 22.4. **ESI-HR** calcd for  $\text{C}_{21}\text{H}_{35}\text{BNO}_3\text{S}^+$  ( $[\text{M}+\text{H}]^+$ ) 392.2425, found 392.2416. **IR**  $\nu$  ( $\text{cm}^{-1}$ ) 3406, 2975, 1620, 1142, 852. **M. P.** 89-91 °C.  $[\alpha]_{\text{D}}^{20} = +17.1$  ( $c = 0.42$ ,  $\text{CHCl}_3$ ) for a 97% *ee* sample. The enantiomeric purity of this compound was determined by HPLC analysis in comparison with authentic racemic material (Chiralpak OD, 99.2:0.8 hexanes:*i*-PrOH, 1.0 mL/min, 208 nm):  $t_{\text{major}} = 11.188$  min,  $t_{\text{minor}} = 7.905$  min.

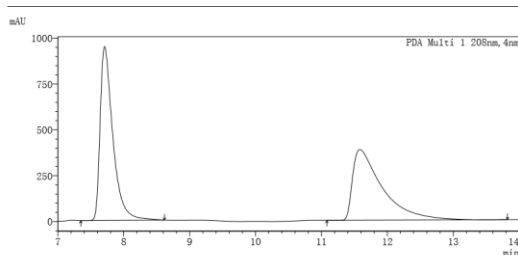

<Peak Results>

| Index | Time/min | Height/mAU | Quantity/Area | Area %/% |
|-------|----------|------------|---------------|----------|
| 1     | 7.710    | 948862     | 12720611      | 51.414   |
| 2     | 11.385   | 386445     | 12020862      | 48.586   |

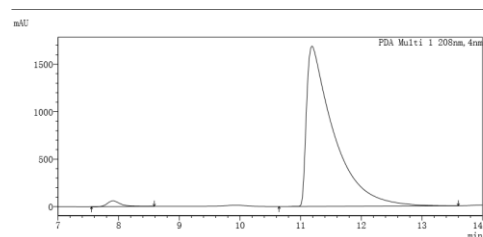

<Peak Results>

| Index | Time/min | Height/mAU | Quantity/Area | Area %/% |
|-------|----------|------------|---------------|----------|
| 1     | 7.905    | 60532      | 929959        | 1.739    |
| 2     | 11.188   | 1687888    | 52557168      | 98.261   |

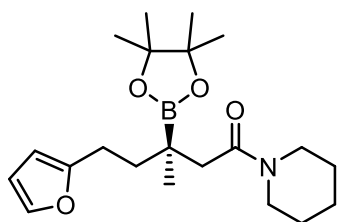

**product 3v:** Following the general procedure, amide **1v** (61.8 mg, 0.25 mmol) was converted to the boration product. Purification by silica gel chromatography gave 61.6 mg (66% yield) of **3v** as a white solid. TLC analysis (hexanes/EtOAc 1:1)  $R_f = 0.50$ ;  $^1\text{H NMR}$  (400 MHz,  $\text{CDCl}_3$ )  $\delta$  7.27 (s, 1H), 6.26 (dd,  $J = 3.1, 1.9$  Hz, 1H), 5.96 (d,  $J = 3.1$  Hz, 1H), 3.65 – 3.49 (m, 2H), 3.35 (q,  $J = 5.6$  Hz, 2H), 2.67 (dddd,  $J = 44.8, 15.6, 11.5, 5.4$  Hz, 2H), 2.45 (d,  $J = 16.7$  Hz, 1H), 2.25 (d,  $J = 16.7$  Hz, 1H), 1.80 – 1.51 (m, 8H), 1.22 (d,  $J = 4.2$  Hz, 12H), 0.99 (s, 3H).  $^{13}\text{C NMR}$  (101 MHz,  $\text{CDCl}_3$ )  $\delta$  174.3, 157.8, 140.5, 110.2, 104.2, 81.1, 46.8, 44.3, 43.7, 36.6, 26.2, 25.5, 25.3, 25.3, 24.3, 24.1, 22.1. **ESI-HR** calcd for  $\text{C}_{21}\text{H}_{35}\text{BNO}_4^+$  ( $[\text{M}+\text{H}]^+$ ) 376.2654, found 376.2643. **IR**  $\nu$  ( $\text{cm}^{-1}$ ) 3417, 2975, 2938, 1617, 1140, 884. **M. P.** 64–66 °C.  $[\alpha]_{\text{D}}^{20} = +27.1$  ( $c = 0.38$ ,  $\text{CHCl}_3$ ) for a 93% *ee* sample. The enantiomeric purity of this compound was determined by HPLC analysis in comparison with authentic racemic material (Chiralpak OD, 99.2:0.8 hexanes:*i*-PrOH, 1.0 mL/min, 208 nm):  $t_{\text{major}} = 7.301$  min,  $t_{\text{minor}} = 8.722$  min.

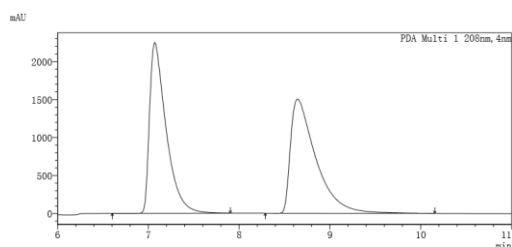

<Peak Results>

| Index | Time/min | Height/mAU | Quantity/Area | Area %/% |
|-------|----------|------------|---------------|----------|
| 1     | 7.072    | 2249797    | 28501092      | 49.423   |
| 2     | 8.644    | 1502419    | 29166718      | 50.577   |

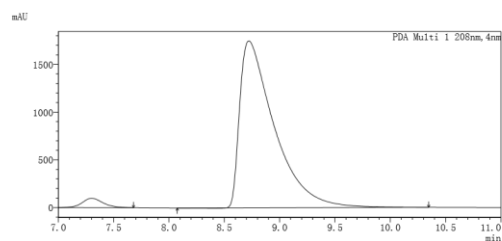

<Peak Results>

| Index | Time/min | Height/mAU | Quantity/Area | Area %/% |
|-------|----------|------------|---------------|----------|
| 1     | 7.301    | 98437      | 1209695       | 2.272    |
| 2     | 8.722    | 1749624    | 38155208      | 96.728   |

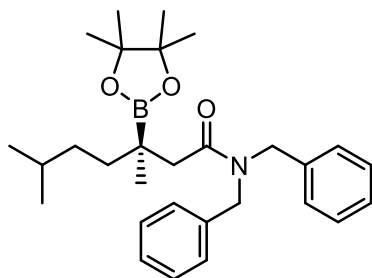

**product 3w:** Following the general procedure, amide **1w** (83.8 mg, 0.25 mmol) was converted to the boration product. Purification by silica gel chromatography gave 81.2 mg (70% yield) of **3w** as a white solid. TLC analysis (hexanes/EtOAc 9:1)  $R_f$  = 0.33;  $^1\text{H}$  NMR (400 MHz,  $\text{CDCl}_3$ )  $\delta$  7.42 – 7.09 (m, 10H), 4.84 (d,  $J$  = 14.7 Hz, 1H), 4.47 (d,  $J$  = 16.9 Hz, 1H), 4.28 (dd,  $J$  = 18.6, 15.9 Hz, 2H), 2.66 (d,  $J$  = 16.6 Hz, 1H), 2.28 (d,  $J$  = 16.6 Hz, 1H), 1.43 (td,  $J$  = 12.9, 7.1 Hz, 2H), 1.29 (d,  $J$  = 6.5 Hz, 13H), 1.18 – 1.11 (m, 2H), 1.02 (s, 3H), 0.85 (dd,  $J$  = 6.6, 3.0 Hz, 6H).  $^{13}\text{C}$  NMR (101 MHz,  $\text{CDCl}_3$ )  $\delta$  174.1, 137.4, 136.4, 129.0, 128.6, 128.5, 127.7, 127.5, 126.5, 82.5, 49.5, 48.1, 44.4, 36.4, 34.3, 29.0, 25.2, 25.2, 22.9, 22.8, 21.7. **ESI-HR** calcd for  $\text{C}_{29}\text{H}_{43}\text{BNO}_3^+$  ( $[\text{M}+\text{H}]^+$ ) 464.3331, found 464.3330. **IR**  $\nu$  ( $\text{cm}^{-1}$ ) 2923, 1644, 1146, 858. **M. P.** 88-90 °C.  $[\alpha]_D^{20}$  = + 49.3 ( $c$  = 0.54,  $\text{CHCl}_3$ ) for a 94% *ee* sample. The enantiomeric purity of this compound was determined by HPLC analysis in comparison with authentic racemic material (Chiralpak IA, 99.6:0.4 hexanes:*i*-PrOH, 1.0 mL/min, 208 nm):  $t_{\text{major}}$  = 7.806 min,  $t_{\text{minor}}$  = 9.780 min.

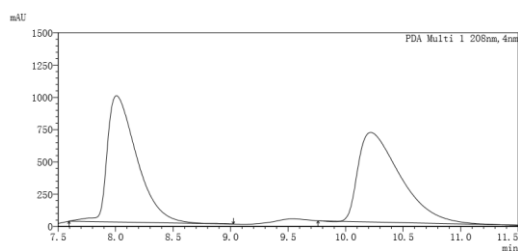

<Peak Results>  
PDA, Chl 208nm

| Index | Time/min | Height/mAU | Quantity/Area | Area % |
|-------|----------|------------|---------------|--------|
| 1     | 7.806    | 978355     | 17551389      | 49.776 |
| 2     | 10.218   | 693649     | 17709410      | 50.224 |

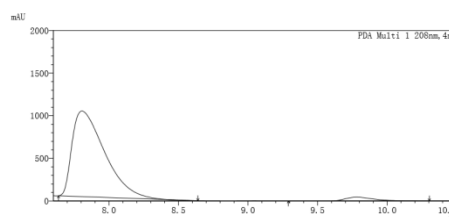

<Peak Results>  
PDA, Chl 208nm

| Index | Time/min | Height/mAU | Quantity/Area | Area % |
|-------|----------|------------|---------------|--------|
| 1     | 7.806    | 1004542    | 16373524      | 96.388 |
| 2     | 9.780    | 45185      | 613369        | 3.612  |

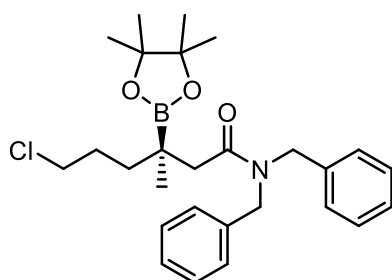



**product 3x:** Following the general procedure, amide **1x** (85.3 mg, 0.25 mmol) was converted to the boration product. Purification by silica gel chromatography gave 104.6 mg (89% yield) of **3x** as a white solid. TLC analysis (hexanes/EtOAc 10:1)  $R_f = 0.25$ ;  $^1\text{H NMR}$  (400 MHz,  $\text{CDCl}_3$ )  $\delta$  7.39 – 6.99 (m, 10H), 4.64 (d,  $J = 14.7$  Hz, 1H), 4.40 – 4.21 (m, 3H), 3.42 (tt,  $J = 6.8, 3.5$  Hz, 2H), 2.53 (d,  $J = 16.6$  Hz, 1H), 2.29 (d,  $J = 16.6$  Hz, 1H), 1.81 – 1.58 (m, 2H), 1.48 (td,  $J = 12.5, 4.6$  Hz, 1H), 1.33 (td,  $J = 12.7, 4.7$  Hz, 1H), 1.21 (d,  $J = 3.9$  Hz, 12H), 0.94 (s, 3H).  $^{13}\text{C NMR}$  (101 MHz,  $\text{CDCl}_3$ )  $\delta$  174.3, 137.1, 136.0, 129.1, 128.7, 128.5, 127.8, 127.6, 126.5, 82.5, 49.7, 48.4, 46.1, 44.2, 35.7, 28.8, 25.2, 25.1, 21.7. **ESI-HR** calcd for  $\text{C}_{27}\text{H}_{38}\text{BClNO}_3^+$  ( $[\text{M}+\text{H}]^+$ ) 470.2628, found 470.2622. **IR**  $\nu$  ( $\text{cm}^{-1}$ ) 2977, 1638, 1264, 733. **M. P.** 90-92 °C.  $[\alpha]_D^{20} = +8.6$  ( $c = 1.88$ ,  $\text{CHCl}_3$ ) for a 97% ee sample. The enantiomeric purity of this compound was determined by HPLC analysis in comparison with authentic racemic material (Chiralpak AD, 99.5:0.5 hexanes:*i*-PrOH, 1.0 mL/min, 208 nm):  $t_{\text{major}} = 13.804$  min,  $t_{\text{minor}} = 17.646$  min.

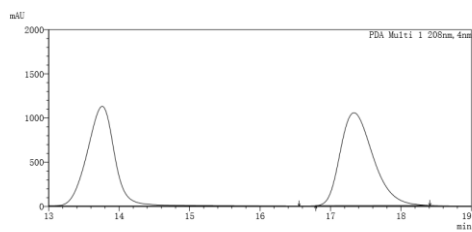

<Peak Results>  
PDA, Chl 208nm

| Index | Time/min | Height/mAU | Quantity/Area | Area % |
|-------|----------|------------|---------------|--------|
| 1     | 13.760   | 1127766    | 30702736      | 47.416 |
| 2     | 17.333   | 1051781    | 33967387      | 52.524 |

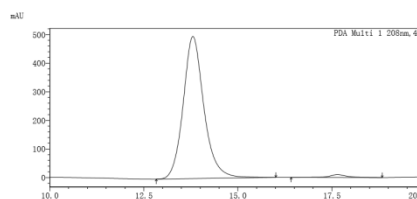

<Peak Results>  
PDA, Chl 208nm

| Index | Time/min | Height/mAU | Quantity/Area | Area % |
|-------|----------|------------|---------------|--------|
| 1     | 13.924   | 497093     | 10099798      | 98.308 |
| 2     | 17.646   | 9816       | 338912        | 1.692  |

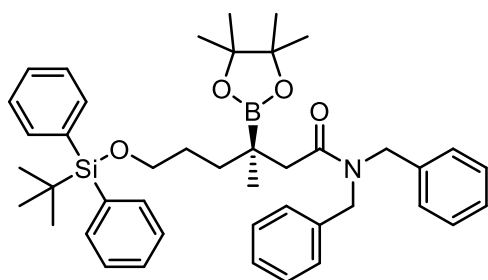

**product 3y:** Following the general procedure with 5 mol% catalyst, amide **1y** (140.3 mg, 0.25 mmol) was converted to the boration product. Purification by silica gel chromatography gave 154.6 mg (90% yield) of **3y** as a colorless oil. TLC analysis (hexanes/EtOAc 7:1)  $R_f = 0.31$ ;  $^1\text{H NMR}$  (400 MHz,  $\text{CDCl}_3$ )  $\delta$  7.67 – 7.61 (m, 4H), 7.42 – 7.20 (m, 14H), 7.14 (d,  $J = 6.9$  Hz, 2H), 4.81 (d,  $J = 14.7$  Hz, 1H), 4.46 (d,  $J = 17.0$  Hz, 1H), 4.28 (dd,  $J = 15.8, 13.1$  Hz, 2H), 3.61 (t,  $J = 6.6$  Hz, 2H), 2.62 (d,  $J = 16.5$  Hz,

1H), 2.28 (d,  $J = 16.6$  Hz, 1H), 1.68 – 1.40 (m, 4H), 1.27 (d,  $J = 5.7$  Hz, 12H), 1.02 (d,  $J = 5.7$  Hz, 12H).  $^{13}\text{C}$  NMR (101 MHz,  $\text{CDCl}_3$ )  $\delta$  174.1, 137.4, 136.4, 135.7, 134.3, 129.6, 129.1, 128.6, 128.6, 127.8, 127.7, 127.5, 126.6, 82.5, 65.0, 49.7, 48.2, 44.4, 34.8, 28.6, 27.0, 25.3, 25.1, 21.8, 19.3. **ESI-HR** calcd for  $\text{C}_{43}\text{H}_{57}\text{BNO}_4\text{Si}^+$  ( $[\text{M}+\text{H}]^+$ ) 690.4144, found 690.4128. **IR**  $\nu$  ( $\text{cm}^{-1}$ ) 2930, 2837, 1642, 1146, 737.  $[\alpha]_{\text{D}}^{20} = +22.8$  ( $c = 0.50$ ,  $\text{CHCl}_3$ ) for a 92% *ee* sample. The enantiomeric purity of this compound was determined by HPLC analysis in comparison with authentic racemic material (Chiralpak AD, 99.2:0.8 hexanes:*i*-PrOH, 1.0 mL/min, 208 nm):  $t_{\text{major}} = 9.492$  min,  $t_{\text{minor}} = 6.342$  min.

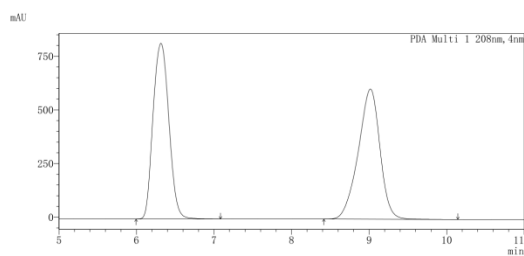

<Peak Results>  
PDA Chl 208nm

| Index | Time/min | Height/mAU | Quantity/Area | Area % |
|-------|----------|------------|---------------|--------|
| 1     | 6.315    | 819074     | 11621222      | 49.648 |
| 2     | 9.016    | 606712     | 11786185      | 50.352 |

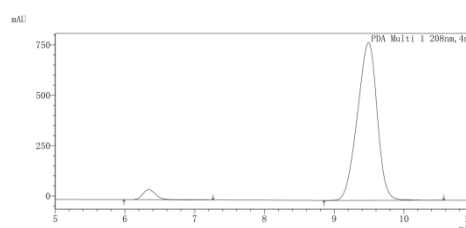

<Peak Results>  
PDA Chl 208nm

| Index | Time/min | Height/mAU | Quantity/Area | Area % |
|-------|----------|------------|---------------|--------|
| 1     | 6.342    | 50380      | 654871        | 4.076  |
| 2     | 9.492    | 784354     | 15411798      | 95.924 |

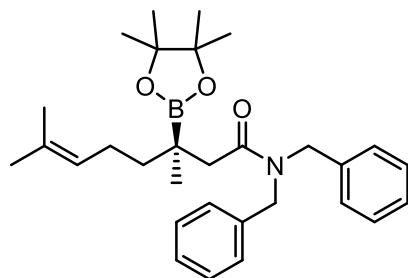

**product 3z:** Following the general procedure, amide **1z** (86.8 mg, 0.25 mmol) was converted to the boration product. Purification by silica gel chromatography gave 83.9 mg (71% yield) of **3z** as a white solid. TLC analysis (hexanes/EtOAc 9:1)  $R_f = 0.43$ ;  $^1\text{H}$  NMR (400 MHz,  $\text{CDCl}_3$ )  $\delta$  7.33 – 7.03 (m, 10H), 5.01 (td,  $J = 7.0, 3.7$  Hz, 1H), 4.76 (d,  $J = 14.7$  Hz, 1H), 4.39 (d,  $J = 16.9$  Hz, 1H), 4.21 (m,  $J = 15.4$  Hz, 2H), 2.59 (d,  $J = 16.6$  Hz, 1H), 2.24 (d,  $J = 16.6$  Hz, 1H), 1.88 (q,  $J = 8.0$  Hz, 2H), 1.49 (s, 3H), 1.42 – 1.33 (m, 1H), 1.22 (m,  $J = 7.1$  Hz, 13H), 0.97 (s, 3H).  $^{13}\text{C}$  NMR (101 MHz,  $\text{CDCl}_3$ )  $\delta$  174.2, 130.9, 129.1, 128.6, 128.5, 127.7, 127.5, 126.6, 125.4, 82.5, 49.6, 48.2, 44.3, 38.9, 25.8, 25.3, 25.1, 24.0, 21.7, 17.7. **IR**  $\nu$  ( $\text{cm}^{-1}$ ) 2974, 1638, 1110, 733, 699. **ESI-**

**HR** calcd for  $C_{30}H_{43}BNO_3^+$  ( $[M+H]^+$ ) 476.3331, found 476.3321. **M. P.** 80-82 °C.  $[\alpha]_D^{20} = +61.6$  ( $c = 0.45$ ,  $CHCl_3$ ) for a 94% *ee* sample. The enantiomeric purity of this compound was determined by HPLC analysis in comparison with authentic racemic material (Chiralpak AD, 99.5:0.5 hexanes:*i*-PrOH, 1.0 mL/min, 208 nm):  $t_{major} = 9.298$  min,  $t_{minor} = 14.821$  min.

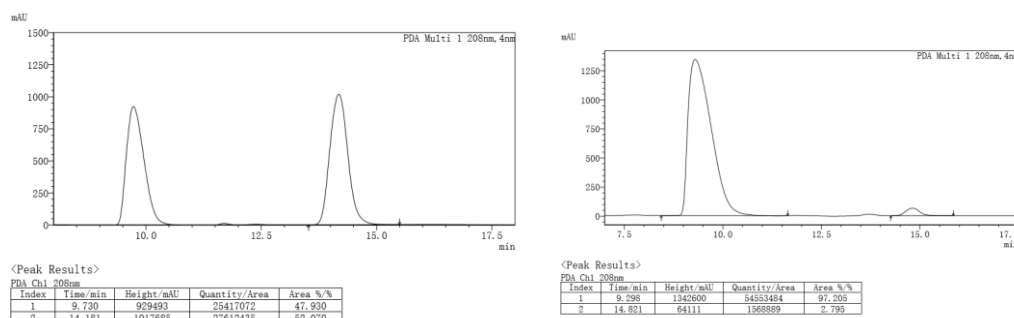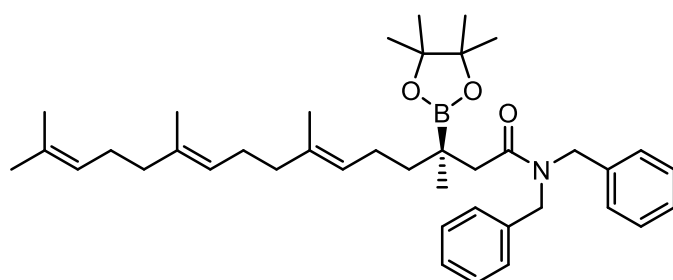

**product 3aa:** Following the general procedure, amide **1aa** (120.8 mg, 0.25 mmol) was converted to the boration product. Purification by silica gel chromatography gave 133.4 mg (73% yield) of **3aa** as a colorless oil. TLC analysis (hexanes/EtOAc 9:1)  $R_f = 0.44$ ; **<sup>1</sup>H NMR** (400 MHz,  $CDCl_3$ )  $\delta$  7.43 – 7.10 (m, 10H), 5.21 – 4.99 (m, 3H), 4.82 (d,  $J = 14.8$  Hz, 1H), 4.46 (d,  $J = 16.9$  Hz, 1H), 4.29 (dd,  $J = 15.8, 12.8$  Hz, 2H), 2.66 (d,  $J = 16.6$  Hz, 1H), 2.31 (d,  $J = 16.5$  Hz, 1H), 2.10 – 1.89 (m, 10H), 1.67 (s, 3H), 1.58 (d,  $J = 7.6$  Hz, 9H), 1.50 – 1.42 (m, 1H), 1.29 (d,  $J = 7.0$  Hz, 13H), 1.05 (s, 3H). **<sup>13</sup>C NMR** (101 MHz,  $CDCl_3$ )  $\delta$  174.1, 137.4, 136.4, 135.0, 134.5, 131.3, 129.1, 128.6, 128.5, 127.7, 127.5, 126.6, 125.3, 124.5, 124.4, 82.5, 49.6, 48.2, 44.3, 39.8, 38.9, 26.9, 26.8, 25.8, 25.3, 25.1, 23.9, 23.6, 21.8, 17.8, 16.1, 16.1. **ESI-HR** calcd for  $C_{40}H_{59}BNO_3^+$  ( $[M+H]^+$ ) 612.4583, found 612.4577. **IR**  $\nu$  ( $cm^{-1}$ ) 2957, 2924, 2859, 1646, 1466, 749.  $[\alpha]_D^{20} = +58.9$  ( $c = 0.65$ ,  $CHCl_3$ ) for a 94% *ee* sample. The enantiomeric purity of this compound was determined by HPLC analysis in comparison with authentic racemic material

(Chiralpak AD, 99.7:0.3 hexanes:*i*-PrOH, 1.0 mL/min, 208 nm):  $t_{\text{major}} = 13.280$  min,  $t_{\text{minor}} = 9.324$  min.

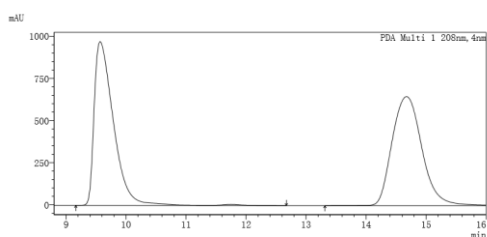

<Peak Results>

| Index | Time/min | Height/mAU | Quantity/Area | Area % |
|-------|----------|------------|---------------|--------|
| 1     | 9.324    | 972385     | 2172794       | 49.253 |
| 2     | 14.673   | 647313     | 2243491       | 50.748 |

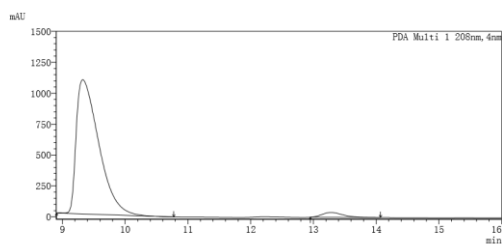

<Peak Results>

| Index | Time/min | Height/mAU | Quantity/Area | Area % |
|-------|----------|------------|---------------|--------|
| 1     | 9.324    | 1085920    | 27082598      | 96.770 |
| 2     | 13.280   | 39369      | 904075        | 3.230  |

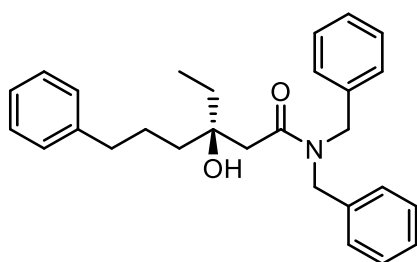

**product 3ab-ol**: Following the general procedure with amide **1ab** (99.3mg, 0.25 mmol), 7.5 mol% catalyst and 3.5 equivalent of HBpin, and the temperature was increased to 0 °C. After the reaction, the residue was dissolved in THF (2.0 mL), 3 M NaOH (2.0 mL) and methanol (2.0 mL) and was cooled to 0 °C. Then 30% aqueous H<sub>2</sub>O<sub>2</sub> (0.5 mL) was added dropwise. The reaction was stirred at room temperature for 3 h. Ethyl acetate (20 mL) was added, and the mixture was washed with water (10 mL), brine (10 mL) and dried over Na<sub>2</sub>SO<sub>4</sub>. After removal of the solvent, the crude product was purified by column chromatography on silica gel with EtOAc/hexanes mixture as eluent to provide 55.6 mg (54% yield) of **3ab-ol** as a colorless oil. TLC analysis (hexanes/EtOAc 7:1)  $R_f = 0.27$ ; **<sup>1</sup>H NMR** (400 MHz, CDCl<sub>3</sub>) δ 7.41 – 7.26 (m, 7H), 7.26 – 7.09 (m, 8H), 5.38 (s, 1H), 4.63 (s, 2H), 4.42 (s, 2H), 2.63 – 2.54 (m, 2H), 2.48 (s, 2H), 1.63 (dt,  $J = 20.8, 6.8$  Hz, 2H), 1.54 – 1.41 (m, 3H), 1.37 – 1.13 (m, 3H), 0.87 (t,  $J = 7.2$  Hz, 3H). **<sup>13</sup>C NMR** (101 MHz, CDCl<sub>3</sub>) δ 174.1, 142.6, 137.0, 136.1, 129.2, 128.9, 128.5, 128.4, 128.3, 128.0, 127.8, 126.4, 125.8, 73.6, 50.2, 48.4, 39.3, 38.5, 36.5, 31.8, 25.8, 8.3. **ESI-HR** calcd for C<sub>28</sub>H<sub>34</sub>NO<sub>2</sub><sup>+</sup> ([M+H]<sup>+</sup>) 416.2584, found 416.2578. **IR**  $\nu$  (cm<sup>-1</sup>) 3404, 3062, 3027, 937, 1620, 1212, 698.  $[\alpha]_D^{20} = +22.4$  ( $c = 1.26$ , CHCl<sub>3</sub>) for an 87% *ee* sample.

The enantiomeric purity of this compound was determined by HPLC analysis in comparison with authentic racemic material (Chiralpak OD, 90.0:10.0 hexanes:*i*-PrOH, 1.0 mL/min, 208 nm):  $t_{\text{major}}=10.240$  min,  $t_{\text{minor}}=11.763$  min.

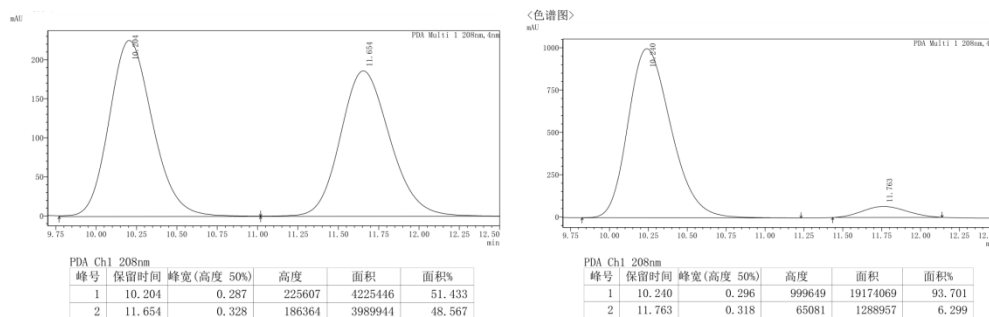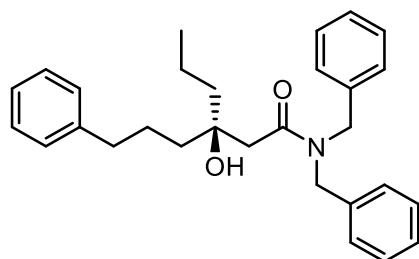

**product 3ac-ol:** Following the procedure described above. Amide **1ac** (102.8mg, 0.25 mmol) was converted to the alcohol product. Purification by silica gel chromatography gave 53.9 mg (50% yield) of **3ac-ol** as a colorless oil. TLC analysis (hexanes/EtOAc 7:1)  $R_f=0.30$ ;  $^1\text{H NMR}$  (400 MHz,  $\text{CDCl}_3$ )  $\delta$  7.41 – 7.26 (m, 7H), 7.26 – 7.09 (m, 8H), 5.38 (s, 1H), 4.63 (s, 2H), 4.42 (s, 2H), 2.63 – 2.54 (m, 2H), 2.48 (s, 2H), 1.63 (dt,  $J = 20.8$ , 6.8 Hz, 2H), 1.54 – 1.41 (m, 3H), 1.37 – 1.13 (m, 3H), 0.87 (t,  $J = 7.2$  Hz, 3H).  $^{13}\text{C NMR}$  (101 MHz,  $\text{CDCl}_3$ )  $\delta$  174.2, 142.6, 137.1, 136.2, 129.2, 128.9, 128.5, 128.4, 128.4, 128.0, 127.8, 126.4, 125.9, 73.4, 50.3, 48.4, 41.9, 39.6, 39.2, 36.5, 25.8, 17.2, 14.8. **ESI-HR** calcd for  $\text{C}_{29}\text{H}_{36}\text{NO}_2^+$  ( $[\text{M}+\text{H}]^+$ ) 430.2741, found 430.2726. **IR**  $\nu$  ( $\text{cm}^{-1}$ ) 3397, 3027, 2931, 2870, 1618, 1328, 1126, 698.  $[\alpha]_D^{20} = +16.4$  ( $c = 0.37$ ,  $\text{CHCl}_3$ ) for a 91% *ee* sample. The enantiomeric purity of this compound was determined by HPLC analysis in comparison with authentic racemic material (Chiralpak OD, 90.0:10.0 hexanes:*i*-PrOH, 1.0 mL/min, 208 nm):  $t_{\text{major}}=9.785$  min,  $t_{\text{minor}}=12.031$  min.

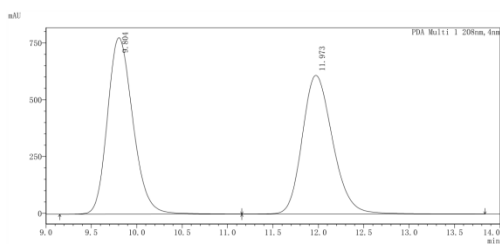

| 峰号 | 保留时间   | 峰宽(高度 50%) | 高度     | 面积       | 面积%    |
|----|--------|------------|--------|----------|--------|
| 1  | 9.804  | 0.298      | 777207 | 15184671 | 51.544 |
| 2  | 11.973 | 0.357      | 610179 | 14274840 | 48.456 |

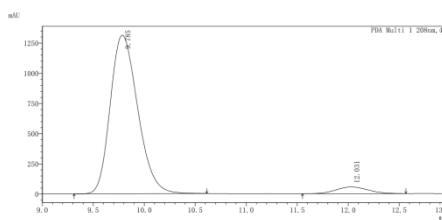

| 峰号 | 保留时间   | 峰宽(高度 50%) | 高度      | 面积       | 面积%    |
|----|--------|------------|---------|----------|--------|
| 1  | 9.785  | 0.290      | 1312842 | 24581429 | 95.327 |
| 2  | 12.031 | 0.342      | 55256   | 1204922  | 4.673  |

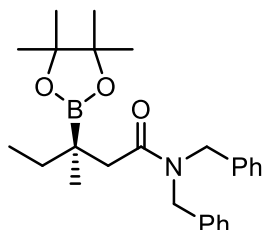

**product 3ad:** Following the general procedure, amide **1ad** (73.3 mg, 0.25 mmol) was converted to the boration product. Purification by silica gel chromatography gave 98.3 mg (93% yield) of **3ad** as a colorless oil. TLC analysis (hexanes/EtOAc 11:1)  $R_f = 0.36$ ;  $^1\text{H NMR}$  (400 MHz,  $\text{CDCl}_3$ )  $\delta$  7.45 – 7.02 (m, 10H), 4.78 (d,  $J = 14.7$  Hz, 1H), 4.46 (d,  $J = 17.0$  Hz, 1H), 4.31 (dd,  $J = 15.8, 5.0$  Hz, 2H), 2.62 (d,  $J = 16.6$  Hz, 1H), 2.29 (d,  $J = 16.5$  Hz, 1H), 1.56 – 1.44 (m, 1H), 1.29 (d,  $J = 6.4$  Hz, 13H), 1.01 (s, 3H), 0.85 (t,  $J = 7.5$  Hz, 3H).  $^{13}\text{C NMR}$  (101 MHz,  $\text{CDCl}_3$ )  $\delta$  174.1, 137.5, 136.4, 129.0, 128.6, 128.5, 127.7, 127.5, 126.6, 82.5, 49.6, 48.2, 44.1, 31.1, 25.2, 25.1, 21.2, 9.6. **ESI-HR** calcd for  $\text{C}_{26}\text{H}_{37}\text{BNO}_3^+$  ( $[\text{M}+\text{H}]^+$ ) 422.2861, found 422.2859. **IR**  $\nu$  ( $\text{cm}^{-1}$ ) 2972, 1644, 1495, 1207, 750.  $[\alpha]_D^{20} = +58.3$  ( $c = 1.44$ ,  $\text{CHCl}_3$ ) for a 95% *ee* sample The enantiomeric purity of this compound was determined by HPLC analysis in comparison with authentic racemic material (Chiralpak AD, 99.2:0.8 hexanes:*i*-PrOH, 1.0 mL/min, 208 nm):  $t_{\text{major}} = 5.830$  min,  $t_{\text{minor}} = 6.469$  min.

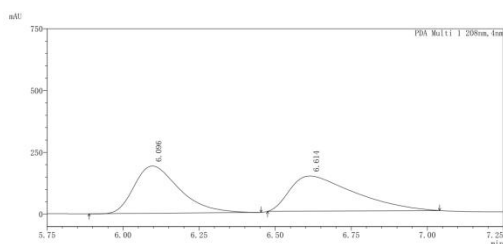

| 峰号 | 保留时间  | 峰宽(高度 50%) | 高度     | 面积      | 面积%    |
|----|-------|------------|--------|---------|--------|
| 1  | 6.096 | 0.157      | 190564 | 1971372 | 48.380 |
| 2  | 6.614 | 0.230      | 142644 | 2103406 | 51.620 |

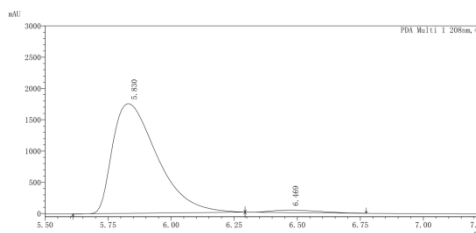

| 峰号 | 保留时间  | 峰宽(高度 50%) | 高度      | 面积       | 面积%    |
|----|-------|------------|---------|----------|--------|
| 1  | 5.830 | 0.190      | 1751129 | 21558364 | 97.685 |
| 2  | 6.469 | 0.215      | 39128   | 510898   | 2.315  |

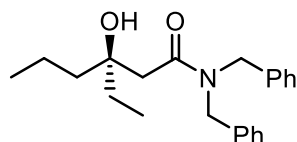

**product 3ae-ol:** Following the procedure described above. Amide **1ae** (80.3 mg, 0.25 mmol), 7.5 mol% catalyst and 3.5 equivalent of HBpin, and the temperature was increased to 0 °C. After the reaction, the residue was dissolved in THF (2.0 mL), 3 M NaOH (2.0 mL) and methanol (2.0 mL) and was cooled to 0 °C. Then 30% aqueous H<sub>2</sub>O<sub>2</sub> (0.5 mL) was added dropwise. The reaction was stirred at room temperature for 3 h. Ethyl acetate (20 mL) was added, and the mixture was washed with water (10 mL), brine (10 mL) and dried over Na<sub>2</sub>SO<sub>4</sub>. After removal of the solvent, the crude product was purified by column chromatography on silica gel with EtOAc/hexanes mixture as eluent to provide 46.1 mg (54% yield) of **3ae-ol** as a colorless oil. TLC analysis (hexanes/EtOAc 9:1) R<sub>f</sub> = 0.48; <sup>1</sup>H NMR (400 MHz, CDCl<sub>3</sub>) δ 7.53 – 7.07 (m, 10H), 5.32 (s, 1H), 4.70 – 4.58 (m, 2H), 4.46 (s, 2H), 2.50 (d, J = 2.0 Hz, 2H), 1.62 – 1.42 (m, 4H), 1.36 – 1.17 (m, 2H), 0.87 (dt, J = 21.6, 7.4 Hz, 6H). <sup>13</sup>C NMR (101 MHz, CDCl<sub>3</sub>) δ 174.2, 137.1, 136.2, 129.2, 128.8, 128.3, 127.9, 127.7, 126.4, 73.6, 50.3, 48.4, 41.2, 39.3, 31.8, 17.1, 14.8, 8.2. **ESI-HR** calcd for C<sub>22</sub>H<sub>30</sub>NO<sub>2</sub><sup>+</sup> ([M+H]<sup>+</sup>) 340.2271, found 340.2256. **IR** ν (cm<sup>-1</sup>) 3405, 2962, 1620, 1214, 1080, 700. [α]<sub>D</sub><sup>20</sup> = + 20.8 (c = 1.49, CHCl<sub>3</sub>) for a 89% *ee* sample The enantiomeric purity of this compound was determined by HPLC analysis in comparison with authentic racemic material (Chiralpak AD, 90.0:10.0 hexanes:*i*-PrOH, 1.0 mL/min, 208 nm): *t*<sub>major</sub> = 9.756 min, *t*<sub>minor</sub> = 8.924 min.

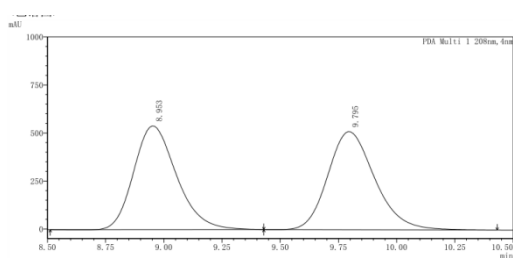

| 峰号 | 保留时间  | 峰宽(高度 50%) | 高度     | 面积      | 面积%    |
|----|-------|------------|--------|---------|--------|
| 1  | 8.953 | 0.195      | 539960 | 6907680 | 49.074 |
| 2  | 9.795 | 0.214      | 510780 | 7168490 | 50.926 |

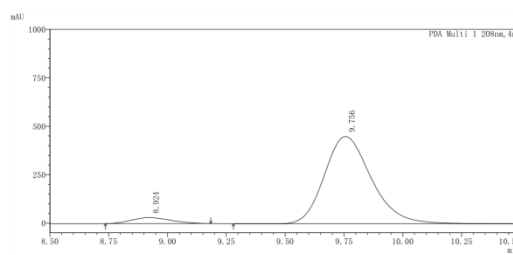

| 峰号 | 保留时间  | 峰宽(高度 50%) | 高度     | 面积      | 面积%    |
|----|-------|------------|--------|---------|--------|
| 1  | 8.924 | 0.187      | 30600  | 362387  | 5.465  |
| 2  | 9.756 | 0.211      | 450738 | 6269214 | 94.535 |

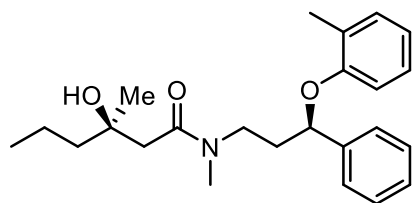

**product 3ah-ol:** Following the general procedure with 5 mol% catalyst, amide **1ah** (91.3 mg, 0.25 mmol). After the reaction, the residue was dissolved in THF (2.0 mL), 3 M NaOH (2.0 mL) and methanol (2.0 mL) and was cooled to 0 °C. Then 30% aqueous H<sub>2</sub>O<sub>2</sub> (0.5 mL) was added dropwise. The reaction was stirred at room temperature for 3 h. Ethyl acetate (20 mL) was added, and the mixture was washed with water (10 mL), brine (10 mL) and dried over Na<sub>2</sub>SO<sub>4</sub>. After removal of the solvent, Analysis of the crude <sup>1</sup>H and <sup>13</sup>C NMR spectra indicates >20:1 dr. the crude product was purified by column chromatography on silica gel with EtOAc/hexanes mixture as eluent to provide 57.0 mg (59% yield) of **3ah-ol** as a colorless oil. Two sets of peaks were observed in <sup>1</sup>H and <sup>13</sup>C NMR spectra due to carbamate rotamers, which are assigned to major and minor rotamers, respectively. TLC analysis (hexanes/EtOAc 2:1) R<sub>f</sub> = 0.31; <sup>1</sup>H NMR (400 MHz, CDCl<sub>3</sub>) δ 7.40 – 7.20 (m, 5H, *overlapping*), 7.12 (t, J = 8.3 Hz, 1H, *overlapping*), 7.02 – 6.90 (m, 1H, *overlapping*), 6.78 (dt, J = 10.3, 7.4 Hz, 1H, *overlapping*), 6.55 (dd, J = 13.1, 8.2 Hz, 1H, *overlapping*), 5.30 (m, J = 7.3 Hz, 1H, *overlapping*), 5.15 (qm, J = 7.0, 6.3 Hz, 1H, *overlapping*), 3.62 (m, 2H, *major*), 3.51 – 3.34 (m, 2H, *minor*), 2.94 (d, J = 2.1 Hz, 3H, *overlapping*), 2.47 – 2.07 (m, 7H, *overlapping*), 1.57 – 1.09 (m, 7H, *overlapping*), 0.88 (m, 3H, *overlapping*). <sup>13</sup>C NMR (101 MHz, CDCl<sub>3</sub>) δ 173.3 (*major*), 173.1 (*minor*), 155.8 (*minor*), 155.3 (*major*), 141.5 (*minor*), 140.9 (*major*), 130.9 (*major*), 130.7 (*minor*), 128.9 (*major*), 128.7 (*minor*), 128.0 (*major*), 127.7 (*minor*), 126.9 (*minor*), 126.9 (*major*), 126.7 (*major*), 126.5 (*minor*), 125.7 (*minor*), 125.5 (*major*), 120.8 (*major*), 120.5 (*minor*), 112.7 (*minor*), 112.5 (*major*), 77.5 (*major*), 76.0 (*minor*), 71.2 (*minor*), 71.1 (*major*), 46.4 (*major*), 45.4 (*minor*), 44.7 (*minor*), 44.4 (*major*), 41.7 (*minor*), 41.1 (*major*), 37.6 (*major*), 36.5 (*minor*), 36.2 (*minor*), 33.2 (*major*), 27.0 (*minor*), 26.9 (*major*), 17.4 (*minor*), 17.1 (*major*), 16.6 (*minor*), 16.6 (*major*), 14.7 (*minor*), 14.7 (*major*). **ESI-HR** calcd for C<sub>24</sub>H<sub>34</sub>NO<sub>3</sub><sup>+</sup> ([M+H]<sup>+</sup>) 384.2533,



found 384.2528. **IR**  $\nu$  (cm<sup>-1</sup>) 3398, 3019, 2958, 1620, 1493, 1214, 743.  $[\alpha]_D^{20} = +48.7$  ( $c = 0.79$ , CHCl<sub>3</sub>).

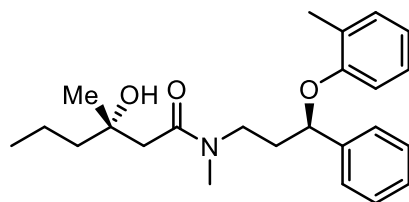

**product 3ak-ol:** Following the general procedure with 5 mol% catalyst and 6mol% (-)-DIOP, amide **1ah** (91.3 mg, 0.25 mmol). After the reaction, the residue was dissolved in THF (2.0 mL), 3 M NaOH (2.0 mL) and methanol (2.0 mL) and was cooled to 0 °C. Then 30% aqueous H<sub>2</sub>O<sub>2</sub> (0.5 mL) was added dropwise. The reaction was stirred at room temperature for 3 h. Ethyl acetate (20 mL) was added, and the mixture was washed with water (10 mL), brine (10 mL) and dried over Na<sub>2</sub>SO<sub>4</sub>. After removal of the solvent, Analysis of the crude **<sup>1</sup>H** and **<sup>13</sup>C NMR** spectra indicates >20:1 dr. the crude product was purified by column chromatography on silica gel with EtOAc/hexanes mixture as eluent to provide 58.5 mg (61% yield) of **3ak-ol** as a colorless oil. Two sets of peaks were observed in **<sup>1</sup>H** and **<sup>13</sup>C NMR** spectra due to carbamate rotamers, which are assigned to major and minor rotamers, respectively. TLC analysis (hexanes/EtOAc 2:1)  $R_f = 0.31$ ; **<sup>1</sup>H NMR** (400 MHz, CDCl<sub>3</sub>)  $\delta$  7.39 – 7.22 (m, 5H, *overlapping*), 7.19 – 7.07 (m, 1H, *overlapping*), 6.95 (t,  $J = 7.8$  Hz, 1H, *overlapping*), 6.78 (dt,  $J = 10.5, 7.4$  Hz, 1H, *overlapping*), 6.56 (dd,  $J = 14.3, 8.2$  Hz, 1H, *overlapping*), 5.30 (s, 1H, *overlapping*), 5.22 – 5.09 (m, 1H, *overlapping*), 3.63 (m, 2H, *major*), 3.42 (m, 2H, *minor*), 2.95 (d,  $J = 3.3$  Hz, 3H *overlapping*), 2.48 – 2.12 (m, 7H *overlapping*), 1.54 – 1.41 (m, 1H *overlapping*), 1.38 – 1.24 (m, 3H *overlapping*), 1.12 (m, 3H *overlapping*), 0.91 (m, 3H, *overlapping*). **<sup>13</sup>C NMR** (101 MHz, CDCl<sub>3</sub>)  $\delta$  173.3 (*major*), 173.2 (*minor*), 155.8 (*minor*), 155.4 (*major*), 141.6 (*minor*), 140.9 (*major*), 131.0 (*major*), 130.8 (*minor*), 129.0 (*major*), 128.8 (*minor*), 128.0 (*major*), 127.8 (*minor*), 126.9 (*overlapping*), 126.8 (*major*), 126.6 (*minor*), 125.8 (*minor*), 125.6 (*major*), 120.9 (*major*), 120.5 (*minor*), 112.8 (*minor*), 112.6 (*major*), 77.6 (*minor*), 76.1 (*major*), 71.3 (*minor*), 71.2 (*major*), 46.4 (*major*), 45.5 (*minor*), 44.8 (*minor*), 44.7

(*major*), 41.8 (*minor*), 41.1 (*major*), 37.7 (*major*), 36.6 (*minor*), 36.3 (*minor*), 33.3 (*major*), 27.0 (*minor*), 26.8 (*major*), 17.4 (*minor*), 17.2 (*major*), 16.7 (*overlapping*), 14.8 (*overlapping*). **ESI-HR** calcd for  $C_{24}H_{34}NO_3^+$  ( $[M+H]^+$ ) 384.2533, found 384.2524. **IR**  $\nu$  ( $cm^{-1}$ ) 3400, 3028, 2958, 1619, 1492, 1212, 737.  $[\alpha]_D^{20} = -17.9$  ( $c = 0.80$ ,  $CHCl_3$ ).

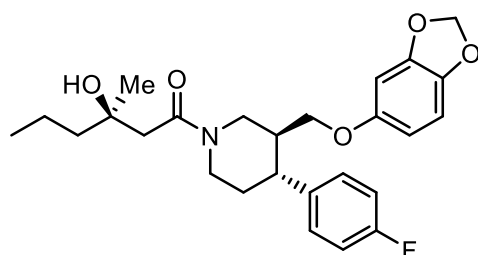

**product 3ai-ol:** Following the procedure described above. Amide **1aj** (109.8mg, 0.25 mmol) was converted to the alcohol product. Analysis of the crude  $^1H$  and  $^{13}C$  NMR spectra indicates >20:1 dr. Purification by silica gel chromatography gave 73.7 mg (64% yield) of **3ai-ol** as a colorless oil. Two sets of peaks were observed in  $^1H$ ,  $^{13}C$  and  $^{19}F$  NMR spectra due to carbamate rotamers, which are assigned to major and minor rotamers, respectively. TLC analysis (hexanes/EtOAc 2:1)  $R_f = 0.27$ ;  $^1H$  NMR (400 MHz,  $CDCl_3$ )  $\delta$  7.13 (dd,  $J = 8.2, 5.3$  Hz, 2H, *overlapping*), 6.99 (td,  $J = 8.5, 6.7$  Hz, 2H, *overlapping*), 6.63 (t,  $J = 8.4$  Hz, 1H, *overlapping*), 6.36 (dd,  $J = 5.6, 2.5$  Hz, 1H, *overlapping*), 6.15 (dd,  $J = 8.4, 2.5$  Hz, 1H, *overlapping*), 5.89 (s, 2H, *overlapping*), 5.21 (s, 1H, *overlapping*), 5.04 – 4.95 (m, 1H, *major*), 4.87 – 4.76 (m, 1H, *minor*), 4.19 (m, 1H, *major*), 4.05 – 3.93 (m, 1H, *minor*), 3.64 (dd,  $J = 10.0, 2.9$  Hz, 1H, , *overlapping*), 3.58 – 3.44 (m, 1H, , *overlapping*), 3.23 – 3.05 (m, 1H, *overlapping*), 2.93 – 2.62 (m, 2H, *overlapping*), 2.58 – 2.39 (m, 2H, *overlapping*), 2.08 – 1.85 (m, 2H, *overlapping*), 1.69 (m, 1H, *overlapping*), 1.61 – 1.32 (m, 4H, *overlapping*), 1.26 (s, 3H, *overlapping*), 0.95 (m, 3H, *overlapping*).  $^{13}C$  NMR (101 MHz,  $CDCl_3$ )  $\delta$  171.5 (*overlapping*), 161.9 ( $J_1 = 245.5$  Hz) (*overlapping*), 154.3 (*minor*), 153.8 (*major*), 148.4 (*major*), 148.3 (*minor*), 142.1 (*major*), 141.9 (*minor*), 138.4 ( $J_4 = 3.7$  Hz) (*overlapping*),

128.9( $J_3 = 8.1$  Hz) (*minor*), 128.8 ( $J_3 = 8.1$  Hz) (*major*), 115.9 ( $J_2 = 22.5$  Hz) (*major*), 115.7 ( $J_2 = 22.5$  Hz) (*minor*), 108.1 (*major*), 108.0 (*minor*), 105.8 (*minor*), 105.7 (*major*), 101.4 (*major*), 101.2 (*minor*), 98.2 (*minor*), 98.1 (*major*), 71.3 (*overlapping*), 68.7 (*overlapping*), 49.2 (*major*), 46.3 (*minor*), 45.0 (*major*), 44.9 (*minor*), 44.8 (*minor*), 44.4 (*major*), 43.9 (*major*), 42.9 (*minor*), 42.2 (*major*), 42.1 (*minor*), 41.4 (*minor*), 41.3 (*major*), 34.6 (*minor*), 33.7 (*major*), 27.3 (*minor*), 27.1 (*major*), 17.5 (*minor*), 17.4 (*major*), 14.8 (*major*), 14.8 (*minor*).  **$^{19}\text{F}$  NMR** (376 MHz,  $\text{CDCl}_3$ )  $\delta$  -115.6 (*major*), -115.7 (*minor*). **ESI-HR** calcd for  $\text{C}_{26}\text{H}_{33}\text{FNO}_5^+$  ( $[\text{M}+\text{H}]^+$ ) 458.2337, found 458.2331. **IR**  $\nu$  ( $\text{cm}^{-1}$ ) 3398, 3019, 1612, 1488, 1265, 746.  $[\alpha]_{\text{D}}^{20} = +39.6$  ( $c = 0.51$ ,  $\text{CHCl}_3$ )

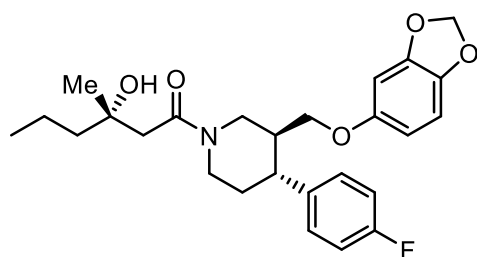

**product 3al-ol:** Following the procedure described above. Amide **1aj** (109.8mg, 0.25 mmol) was converted to the alcohol product. Analysis of the crude  **$^1\text{H}$**  and  **$^{13}\text{C}$**  NMR spectra indicates >20:1 dr. Purification by silica gel chromatography gave 72.3 mg (63% yield) of **3al-ol** as a colorless oil. Two sets of peaks were observed in  **$^1\text{H}$** ,  **$^{13}\text{C}$**  and  **$^{19}\text{F}$**  NMR spectra due to carbamate rotamers, which are assigned to major and minor rotamers, respectively. TLC analysis (hexanes/EtOAc 2:1)  $R_f = 0.27$ ;  **$^1\text{H}$**  NMR (400 MHz,  $\text{CDCl}_3$ )  $\delta$  7.17 – 7.09 (m, 2H, *overlapping*), 7.00 (m, 2H, *overlapping*), 6.63 (t,  $J = 8.2$  Hz, 1H, , *overlapping*), 6.36 (dd,  $J = 4.7, 2.5$  Hz, 1H, *overlapping*), 6.15 (m, 1H, , *overlapping*), 5.89 (d,  $J = 6.6$  Hz, 2H, *overlapping*), 5.21 (s, 1H, *overlapping*), 4.81 (m, 1H, *overlapping*), 4.19 (m, 1H, *minor*), 4.00 (m, 1H, *major*), 3.64 (t,  $J = 2.1$  Hz, 1H, *overlapping*), 3.49 (m, 1H, *overlapping*), 3.22 – 3.04 (m, 1H, *overlapping*), 2.85 (td,  $J = 11.9, 4.0$  Hz, 1H, *overlapping*), 2.77 – 2.62 (m, 2H, *overlapping*), 2.57 – 2.42 (m, 2H, *overlapping*), 2.05 – 1.88 (m, 2H, *overlapping*), 1.76 – 1.66 (m, 1H, *overlapping*), 1.60

– 1.32 (m, 4H, *overlapping*), 1.25 (d,  $J = 8.1$  Hz, 3H, *overlapping*), 0.95 (t,  $J = 7.1$  Hz, 3H, *overlapping*).  $^{13}\text{C}$  NMR (101 MHz,  $\text{CDCl}_3$ )  $\delta$  171.5 (*overlapping*), 161.8 ( $J_1 = 245.5$  Hz) (*overlapping*), 154.3 (*minor*), 153.9 (*major*), 148.4 (*major*), 148.3 (*minor*), 142.1 (*major*), 141.9 (*minor*), 138.4 ( $J_4 = 6.0$  Hz) (*overlapping*), 128.9 ( $J_3 = 9.6$  Hz) (*minor*), 128.8 ( $J_3 = 9.6$  Hz) (*major*), 115.9 ( $J_2 = 21.2$  Hz) (*major*), 115.8 ( $J_2 = 21.2$  Hz) (*minor*), 108.1 (*major*), 108.0 (*minor*), 105.8 (*overlapping*), 101.4 (*major*), 101.2 (*minor*), 98.2 (*minor*), 98.1 (*major*), 71.3 (*overlapping*), 68.7 (*major*), 68.7 (*minor*), 49.2 (*major*), 46.4 (*minor*), 45.1 (*major*), 44.9 (*minor*), 44.8 (*minor*), 44.4 (*major*), 43.9 (*minor*), 42.9 (*major*), 42.2 (*minor*), 42.1 (*major*), 41.5 (*minor*), 41.3 (*major*), 34.6 (*major*), 33.8 (*minor*), 27.2 (*major*), 27.0 (*minor*), 17.5 (*major*), 17.4 (*minor*), 14.8 (*minor*), 14.8 (*major*).  $^{19}\text{F}$  NMR (376 MHz,  $\text{CDCl}_3$ )  $\delta$  -115.6 (*major*), -115.7 (*minor*). **ESI-HR** calcd for  $\text{C}_{26}\text{H}_{33}\text{FNO}_5^+$  ( $[\text{M}+\text{H}]^+$ ) 458.2337, found 458.2323. **IR**  $\nu$  ( $\text{cm}^{-1}$ ) 3400, 2979, 1619, 1495, 1267, 732.  $[\alpha]_{\text{D}}^{20} = -21.3$  ( $c = 1.25$ ,  $\text{CHCl}_3$ ).

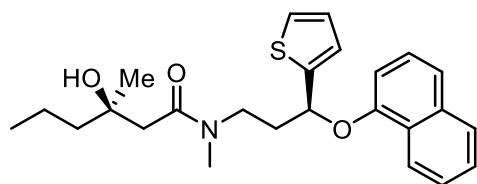

**product 3aj-ol:** Following the procedure described above. Amide **1aj** (101.8mg, 0.25 mmol) was converted to the alcohol product. Analysis of the crude  $^1\text{H}$  and  $^{13}\text{C}$  NMR spectra indicates >20:1 dr. Purification by silica gel chromatography gave 76.1 mg (72% yield) of **3aj-ol** as a colorless oil. Two sets of peaks were observed in  $^1\text{H}$  and  $^{13}\text{C}$  NMR spectra due to carbamate rotamers, which are assigned to major and minor rotamers, respectively. TLC analysis (hexanes/EtOAc 2:1)  $R_f = 0.31$ ;  $^1\text{H}$  NMR (400 MHz,  $\text{CDCl}_3$ )  $\delta$  8.33 (td,  $J = 8.2, 6.6, 4.5$  Hz, 1H, *overlapping*), 7.88 – 7.65 (m, 1H, *overlapping*), 7.55 – 7.45 (m, 2H, *overlapping*), 7.40 (dd,  $J = 10.6, 8.2$  Hz, 1H, *overlapping*), 7.29 – 7.16 (m, 2H, *overlapping*), 7.11 – 7.02 (m, 1H, *overlapping*), 6.93 (ddd,  $J = 15.3, 5.0, 3.5$  Hz, 1H, *overlapping*), 6.80 (dd,  $J = 13.1, 7.7$  Hz, 1H, *overlapping*), 5.69 (dd,  $J = 8.0, 4.8$  Hz, 1H, *major*), 5.61 (dd,  $J = 8.4, 4.0$  Hz, 1H, *minor*), 5.26 (s, 1H, *major*), 5.21 (s,

1H, *minor*), 3.83 – 3.69 (m, 1H *overlapping*), 3.50 (dddd, J = 40.4, 14.7, 8.3, 5.3 Hz, 1H, *overlapping*), 2.95 (d, J = 2.6 Hz, 3H, *overlapping*), 2.55 – 2.10 (m, 4H, *overlapping*), 1.57 – 1.23 (m, 2H, *overlapping*), 1.17 (s, 3H, *major*), 1.12 (td, J = 6.9, 3.1 Hz, 2H, *overlapping*), 0.91 (m, 3H, *major*), 0.86 (s, 3H, *minor*), 0.82 – 0.71 (m, 3H, *minor*). <sup>13</sup>C NMR (101 MHz, CDCl<sub>3</sub>) δ 173.4 (*major*), 173.3 (*minor*), 153.1 (*minor*), 152.7 (*major*), 144.6 (*minor*), 144.0 (*major*), 134.8 (*major*), 134.7 (*minor*), 127.9 (*major*), 127.7 (*minor*), 127.0 (*major*), 126.8 (*minor*), 126.7 (*major*), 126.4 (*minor*), 126.1 (*minor*), 125.9 (*major*), 125.8 (*minor*), 125.8 (*major*), 125.7 (*major*), 125.4 (*minor*), 125.2 (*minor*), 125.0 (*major*), 125.0 (*major*), 124.8 (*minor*), 122.0 (*minor*), 121.6 (*major*), 121.3 (*major*), 120.9 (*minor*), 107.1 (*minor*), 106.9 (*major*), 74.5 (*minor*), 72.9 (*major*), 71.2 (*minor*), 71.0 (*major*), 46.1 (*major*), 45.3 (*minor*), 44.8 (*minor*), 44.6 (*major*), 41.8 (*minor*), 41.0 (*major*), 37.7 (*major*), 36.6 (*minor*), 36.3 (*minor*), 33.2 (*major*), 27.0 (*minor*), 26.5 (*major*), 17.3 (*minor*), 17.0 (*major*), 14.8 (*minor*), 14.7 (*major*). **ESI-HR** calcd for C<sub>25</sub>H<sub>32</sub>NO<sub>3</sub>S<sup>+</sup> ([M+H]<sup>+</sup>) 426.2097, found 426.2091. **IR** ν (cm<sup>-1</sup>) 3401, 3052, 2959, 1620, 1264, 737. [α]<sub>D</sub><sup>20</sup> = +112.3 (c = 1.07, CHCl<sub>3</sub>).

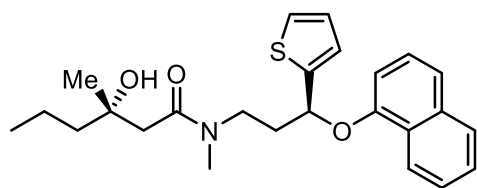

**product 3am-ol:** Following the procedure described above. Amide **1aj** (101.8mg, 0.25 mmol) was converted to the alcohol product. Analysis of the crude <sup>1</sup>H and <sup>13</sup>C NMR spectra indicates >20:1 dr. Purification by silica gel chromatography gave 73.5 mg (69% yield) of **3am-ol** as a colorless oil. Two sets of peaks were observed in <sup>1</sup>H and <sup>13</sup>C NMR spectra due to carbamate rotamers, which are assigned to major and minor rotamers, respectively. TLC analysis (hexanes/EtOAc 2:1) R<sub>f</sub> = 0.31; <sup>1</sup>H NMR (400 MHz, CDCl<sub>3</sub>) δ 8.41 – 8.25 (m, 1H, *overlapping*), 7.78 (t, J = 7.8, Hz, 1H, *overlapping*), 7.50

(m, 2H, *overlapping*), 7.41 (t,  $J = 9.1$  Hz, 1H, *overlapping*), 7.33 – 7.23 (m, 2H, *major*), 7.23 – 7.17 (m, 2H, *minor*), 7.08 (t,  $J = 3.2$  Hz, 1H, *overlapping*), 6.94 (m, 1H, *overlapping*), 6.81 (m, 1H, *overlapping*), 5.69 (dd,  $J = 8.2, 4.1$  Hz, 1H, *minor*), 5.63 (dd,  $J = 8.2, 4.1$  Hz, 1H, *major*), 5.27 (s, 1H, *minor*), 5.17 (s, 1H, *major*), 3.81 – 3.65 (m, 1H, *overlapping*), 3.54 (m, 1H, *overlapping*), 2.96 (s, 3H), 2.53 – 2.15 (m, 4H, *overlapping*), 1.55 – 1.29 (m, 2H, *overlapping*), 1.25 – 0.96 (m, 5H, *overlapping*), 0.91 (t,  $J = 7.5$  Hz, 3H, *major*), 0.75 (t,  $J = 6.9$  Hz, 3H, *minor*).  $^{13}\text{C}$  NMR (101 MHz,  $\text{CDCl}_3$ )  $\delta$  173.4 (*minor*), 173.3 (*major*), 153.1 (*major*), 152.7 (*minor*), 144.7 (*minor*), 144.1 (*major*), 134.8 (*major*), 134.7 (*minor*), 127.9 (*major*), 127.7 (*minor*), 127.0 (*major*), 126.8 (*minor*), 126.7 (*major*), 126.5 (*minor*), 126.2 (*minor*), 125.9 (*major*), 125.8 (*minor*), 125.8 (*minor*), 125.7 (*major*), 125.4 (*minor*), 125.2 (*major*), 125.0 (*major*), 125.0 (*major*), 124.9 (*minor*), 122.1 (*minor*), 121.6 (*major*), 121.3 (*major*), 121.0 (*minor*), 107.1 (*minor*), 106.9 (*major*), 74.5 (*minor*), 73.0 (*major*), 71.3 (*major*), 71.1 (*minor*), 46.3 (*major*), 45.3 (*minor*), 44.8 (*minor*), 44.4 (*major*), 41.8 (*major*), 41.2 (*minor*), 37.8 (*major*), 36.7 (*minor*), 36.4 (*minor*), 33.3 (*major*), 27.1 (*minor*), 26.8 (*major*), 17.4 (*minor*), 17.0 (*major*), 14.8 (*minor*), 14.7 (*major*). **ESI-HR** calcd for  $\text{C}_{25}\text{H}_{32}\text{NO}_3\text{S}^+$  ( $[\text{M}+\text{H}]^+$ ) 426.2097, found 426.2092. **IR**  $\nu$  ( $\text{cm}^{-1}$ ) 3400, 3054, 2960, 1619, 1264, 732.  $[\alpha]_{\text{D}}^{20} = +49.0$  ( $c = 1.0, \text{CHCl}_3$ ).

### Synthetic Transformation of Boration Products

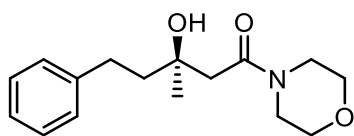

**product 4<sup>2</sup>**: To a solution of hydroboration product **3i** (77.4 mg, 0.20 mmol) in THF (2.0 mL) and water (2.0 mL) was added sodium perborate trihydrate (4.0 equiv). The reaction was stirred at room temperature for 12 h. Ethyl acetate (20 mL) was added, and the mixture was washed with water (10 mL), brine (10 mL) and dried over  $\text{Na}_2\text{SO}_4$ . After removal of the solvent, the residue was purified by column chromatography on silica gel with EtOAc/hexanes mixture as eluent to give 43.6 mg (79% yield) of **4** as a

colorless oil. TLC analysis (hexanes/EtOAc 1:1)  $R_f = 0.16$ ;  $^1\text{H NMR}$  (400 MHz,  $\text{CDCl}_3$ )  $\delta$  7.35 – 7.13 (m, 5H), 5.16 (s, 1H), 3.65 (tt,  $J = 8.3, 4.5$  Hz, 6H), 3.42 (td,  $J = 4.5, 2.0$  Hz, 2H), 2.74 (dddd,  $J = 39.6, 13.5, 11.5, 5.4$  Hz, 2H), 2.54 – 2.34 (m, 2H), 1.86 (dddd,  $J = 37.0, 13.6, 11.5, 5.6$  Hz, 2H), 1.32 (s, 3H).  $^{13}\text{C NMR}$  (101 MHz,  $\text{CDCl}_3$ )  $\delta$  171.5, 142.6, 128.5, 128.5, 125.9, 71.1, 66.9, 66.6, 46.1, 44.1, 41.8, 41.5, 30.4, 27.1. **ESI-HR** calcd for  $\text{C}_{16}\text{H}_{24}\text{NO}_3^+$  ( $[\text{M}+\text{H}]^+$ ) 278.1751, found 278.1743. **IR**  $\nu$  ( $\text{cm}^{-1}$ ) 3406, 2917, 2857, 1613, 1113, 699.  $[\alpha]_{\text{D}}^{20} = +27.0$  ( $c = 0.47$ ,  $\text{CHCl}_3$ ) for a 91% *ee* sample. The enantiomeric purity of this compound was determined by HPLC analysis in comparison with authentic racemic material (Chiralpak ID, 90.0:10.0 hexanes:*i*-PrOH, 1.0 mL/min, 208 nm):  $t_{\text{major}} = 26.532$  min,  $t_{\text{minor}} = 27.789$  min.

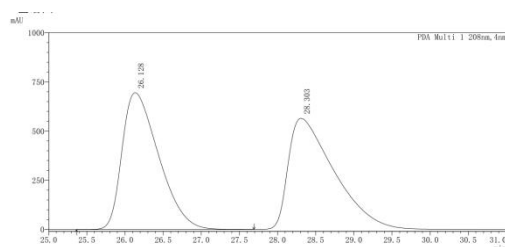

| 峰号 | 保留时间   | 峰宽(高度 50%) | 高度     | 面积       | 面积%    |
|----|--------|------------|--------|----------|--------|
| 1  | 26.128 | 0.521      | 695257 | 23242731 | 49.543 |
| 2  | 28.303 | 0.643      | 565112 | 23671722 | 50.457 |

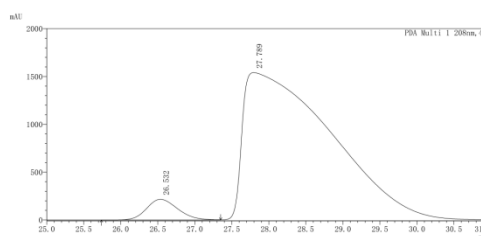

| 峰号 | 保留时间   | 峰宽(高度 50%) | 高度      | 面积        | 面积%    |
|----|--------|------------|---------|-----------|--------|
| 1  | 26.532 | 0.451      | 216404  | 6318704   | 4.690  |
| 2  | 27.789 | 1.368      | 1541401 | 128394386 | 95.310 |

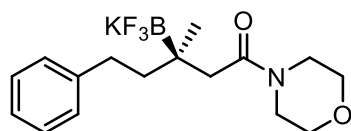

**product 5<sup>3</sup>**: In a 25 mL reaction tube with a magnetic stir bar, the hydroboration product **3i** (77.4 mg, 0.20 mmol) was dissolved in MeCN (2.0 mL). Water (2.0 mL) and  $\text{KHF}_2$  (0.80 mmol, 4.0 equiv) were added. The reaction mixture was stirred at room temperature for 12 h, concentrated, and azeotroped with MeOH (5 mL  $\times$  3). The resulting material was then placed on high vacuum overnight. The crude product was extracted with hot acetone, filtered and then concentrated.  $\text{Et}_2\text{O}$  (10 mL) was added to the crude material, and the mixture was sonicated for 30 min. After filtration, the trifluoroborate salt was obtained as a white solid (60.8 mg, 83% yield).  $^1\text{H NMR}$  (400 MHz,  $(\text{CD}_3)_2\text{CO}$ )  $\delta$  7.19 (d,  $J = 4.4$  Hz, 4H), 7.07 (m, 1H), 3.52 (s, 8H), 2.74 – 2.64 (m, 2H), 2.34 (d,  $J = 13.0$  Hz, 1H), 2.24 (d,  $J = 13.0$  Hz, 1H), 1.63 – 1.55 (m, 2H), 0.90 (s, 3H).  $^{13}\text{C NMR}$  (101 MHz,  $(\text{CD}_3)_2\text{CO}$ )  $\delta$  174.0, 146.8, 129.3, 128.7, 125.5, 67.6, 67.5, 48.1, 43.4, 42.4,

39.6, 32.8, 23.4.  $^{19}\text{F}$  NMR (376 MHz,  $(\text{CD}_3)_2\text{CO}$ )  $\delta$  -148.57. IR  $\nu$  ( $\text{cm}^{-1}$ ) 2937, 2853, 1619, 1114, 696.  $[\alpha]_{\text{D}}^{20} = -24.0$  ( $c = 0.38$ , Acetone) ESI-HR calcd for  $\text{C}_{16}\text{H}_{22}\text{BF}_3\text{NO}_2^-$  ( $[\text{M}-\text{K}^+]$ ) 328.1704, found 328.1701.

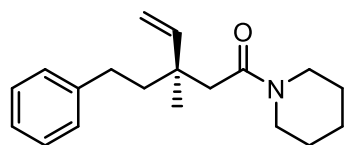

**product 6<sup>4</sup>:** To a solution of hydroboration product **3e** (77.0 mg, 0.20 mmol) in THF (2.0 mL) was added vinylmagnesium bromide (4.0 equiv). The resultant mixture was stirred at room temperature for 1 h. To the above solution was cooled to  $-78$  °C and iodine (4.0 equiv) in methanol (1.0 mL) was added. The reaction mixture was stirred at the  $-78$  °C for 1 h followed by addition of a solution of NaOMe (8.0 equiv) in methanol (2.0 mL). After warming to room temp, the resultant mixture was stirred for another 1.5 h. It was then diluted with pentane (20 mL) and washed with a solution of  $\text{Na}_2\text{S}_2\text{O}_3$  (3.0 mL). Ethyl acetate (20 mL) was added, and the mixture was washed with water (10 mL), brine (10 mL) and dried over  $\text{Na}_2\text{SO}_4$ . After removal of the solvent, the reaction mixture was concentrated. Purification by silica gel chromatography gave 26.1 mg (46% yield) of **6** as a white solid. TLC analysis (hexanes/EtOAc 4:1)  $R_f = 0.23$ ;  $^1\text{H}$  NMR (400 MHz,  $\text{CDCl}_3$ )  $\delta$  7.30 – 7.12 (m, 5H), 5.94 (dd,  $J = 17.5, 10.8$  Hz, 1H), 5.13 – 4.92 (m, 2H), 3.55 (t,  $J = 5.5$  Hz, 2H), 3.40 (t,  $J = 5.4$  Hz, 2H), 2.56 (t,  $J = 8.6$  Hz, 2H), 2.47 – 2.36 (m, 2H), 1.81 (dp,  $J = 9.9, 6.3$  Hz, 2H), 1.57 (dq,  $J = 35.5, 6.4, 5.8$  Hz, 6H), 1.22 (s, 3H).  $^{13}\text{C}$  NMR (101 MHz,  $\text{CDCl}_3$ )  $\delta$  169.4, 146.3, 143.1, 128.5, 128.4, 125.7, 112.2, 47.8, 43.0, 42.7, 42.7, 40.0, 30.9, 26.7, 25.8, 24.7, 23.3. ESI-HR calcd for  $\text{C}_{19}\text{H}_{27}\text{KNO}^+$  ( $[\text{M}+\text{K}]^+$ ) 324.1724, found 324.1712. IR  $\nu$  ( $\text{cm}^{-1}$ ) 2930, 2855, 1632, 1444, 1140, 700. **M. P.** 40-42 °C.  $[\alpha]_{\text{D}}^{20} = +21.1$  ( $c = 0.27$ ,  $\text{CHCl}_3$ ) for a 96% *ee* sample. The enantiomeric purity of this compound was determined by HPLC analysis in comparison with authentic racemic material (Chiralpak IC, 92.0:8.0 hexanes:*i*-PrOH, 1.0 mL/min, 208 nm):  $t_{\text{major}} = 16.846$  min,  $t_{\text{minor}} = 18.563$  min.



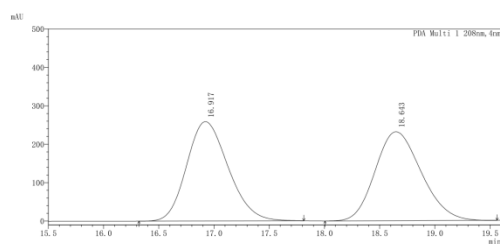

| 峰号 | 保留时间   | 峰宽(高度 50%) | 高度     | 面积      | 面积%    |
|----|--------|------------|--------|---------|--------|
| 1  | 16.917 | 0.406      | 258618 | 6774781 | 50.221 |
| 2  | 18.643 | 0.452      | 231609 | 6715240 | 49.779 |

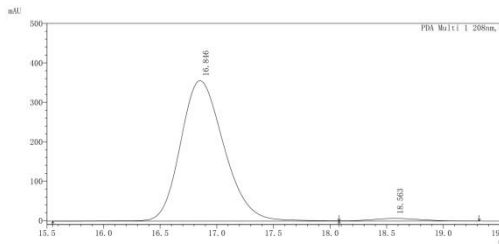

| 峰号 | 保留时间   | 峰宽(高度 50%) | 高度     | 面积      | 面积%    |
|----|--------|------------|--------|---------|--------|
| 1  | 16.846 | 0.409      | 356453 | 9515774 | 97.882 |
| 2  | 18.563 | 0.461      | 6797   | 205924  | 2.118  |

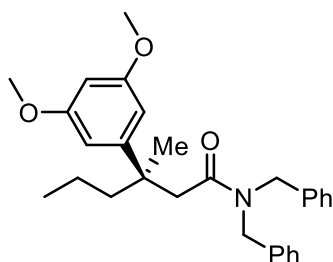

**Product 7<sup>5</sup>:** In a 25 mL flame-dried Schlenk tube with a magnetic stir bar, the 1-bromo-3,5-dimethoxybenzene (102 mg, 0.470 mmol, 1.4 equiv) and THF (2.0 mL) were added under Ar atmosphere. Then *t*-BuLi (0.94 mmol, 2.8 equiv) was added dropwise at -78 °C. The reaction mixture was stirred for 1 hour at the same temperature, and then **3a** (146 mg, 0.330 mmol, 1.0 equiv) was added dropwise as a solution in THF (1.0 mL). After stirring at the -78 °C for another 1 hour, a solution of NBS (238 mg, 1.33 mmol, 4.0 equiv) in THF (2.0 mL) was added dropwise. The reaction mixture was stirred at -78 °C for 1 hour. Then the reaction mixture was quenched with saturated Na<sub>2</sub>S<sub>2</sub>O<sub>3</sub> solution (2.0 mL). Ethyl acetate (20 mL) was added, and the mixture was washed with water (10 mL), brine (10 mL) and dried over Na<sub>2</sub>SO<sub>4</sub>. After removal of the solvent, the reaction mixture was concentrated. Purification by silica gel chromatography gave 69.1 mg (47% yield) of **7** as a colorless oil. TLC analysis (hexanes/EtOAc 4:1) R<sub>f</sub> = 0.48; <sup>1</sup>H NMR (400 MHz, CDCl<sub>3</sub>) δ 7.42 – 7.16 (m, 6H), 7.12 – 6.96 (m, 4H), 6.49 (d, J = 2.2 Hz, 2H), 6.32 (t, J = 2.2 Hz, 1H), 4.73 (d, J = 14.9 Hz, 1H), 4.31 (dd, J = 16.1, 7.0 Hz, 2H), 4.14 (d, J = 17.3 Hz, 1H), 3.75 (s, 6H), 2.79 (d, J = 14.6 Hz, 1H), 2.58 (d, J = 14.6 Hz, 1H), 1.87 – 1.67 (m, 2H), 1.55 (s, 3H), 1.26 – 1.16 (m, 1H), 1.05 – 0.93 (m, 1H), 0.83 (t, J = 7.2 Hz, 3H). <sup>13</sup>C NMR (101 MHz, CDCl<sub>3</sub>) δ 171.8, 160.8, 150.1, 137.6, 136.9, 129.0, 128.6, 128.1, 127.6, 127.2, 126.4, 105.1, 97.3, 55.3, 50.3, 48.2, 45.4, 45.4, 41.5, 24.5, 17.5, 14.8. **ESI-HR** calcd for C<sub>29</sub>H<sub>36</sub>NO<sub>3</sub><sup>+</sup> ([M+H]<sup>+</sup>) 446.2690, found 446.2687.

**IR**  $\nu$  (cm<sup>-1</sup>) 3010, 2935, 1615, 1216, 750.  $[\alpha]_D^{20} = +72.2$  ( $c = 0.65$ , CHCl<sub>3</sub>) for a 96% *ee* sample. The enantiomeric purity of this compound was determined by HPLC analysis in comparison with authentic racemic material (Chiralpak OD, 94.0:6.0 hexanes:*i*-PrOH, 1.0 mL/min, 208 nm):  $t_{\text{major}} = 7.718$  min,  $t_{\text{minor}} = 6.656$  min.

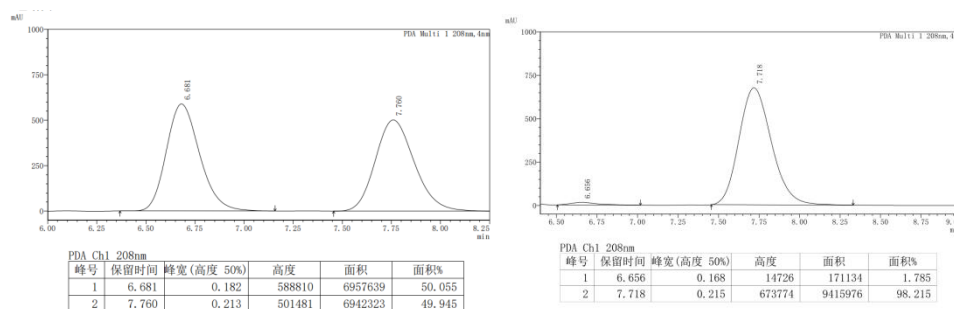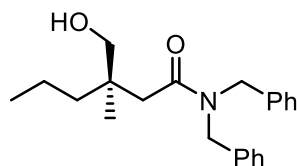

**product 8<sup>6</sup>**: In a 10 mL flame-dried Schlenk tube with a magnetic stir bar, the ClCH<sub>2</sub>I (176 mg, 1.00 mmol, 5.0 equiv), **3a** (87.0 mg, 0.20 mmol, 1.0 equiv) and THF (2.0 mL) was added under Ar atmosphere. Then *n*-BuLi (1.0 mmol, 5.0 equiv) was added dropwise at -78 °C. The reaction mixture was stirred for 10 min at the same temperature, and then the reaction was stirred at the room temperature for another 1 hour. To the reaction mixture was added 3 M NaOH (2.0 mL) and methanol (2.0 mL), and it was cooled to 0 °C. Then 30% aqueous H<sub>2</sub>O<sub>2</sub> (0.5 mL) was added dropwise. The reaction was stirred at room temperature for 3 h. Ethyl acetate (20 mL) was added, and the mixture was washed with water (10 mL), brine (10 mL) and dried over Na<sub>2</sub>SO<sub>4</sub>. After removal of the solvent, the reaction mixture was concentrated. Purification by silica gel chromatography gave 30.4 mg (45% yield) of **8** as a colorless oil. TLC analysis (hexanes/EtOAc 2:1)  $R_f = 0.51$ ; <sup>1</sup>H NMR (400 MHz, CDCl<sub>3</sub>)  $\delta$  7.51 – 7.08 (m, 10H), 4.72 (t,  $J = 13.9$  Hz, 2H), 4.59 – 4.39 (m, 3H), 3.59 – 3.37 (m, 2H), 2.59 – 2.37 (m, 2H), 1.39 – 1.17 (m, 4H), 0.98 – 0.80 (m, 6H). <sup>13</sup>C NMR (101 MHz, CDCl<sub>3</sub>)  $\delta$  174.1, 137.2, 136.3, 129.2, 128.8, 128.4, 128.0, 127.7, 126.5, 70.5, 51.0, 48.6, 41.4, 41.0, 39.4, 22.8,

17.0, 15.0. **ESI-HR** calcd for  $C_{22}H_{30}NO_2^+$  ( $[M+H]^+$ ) 340.2271, found 340.2269. **IR**  $\nu$  ( $cm^{-1}$ ) 3396, 2956, 1615, 1417, 1265, 733.  $[\alpha]_D^{20} = +137.3$  ( $c = 0.33$ ,  $CHCl_3$ ). for a 96% *ee* sample. The enantiomeric purity of this compound was determined by HPLC analysis in comparison with authentic racemic material (Chiralpak AD, 84.0:16.0 hexanes:*i*-PrOH, 1.0 mL/min, 208 nm):  $t_{major} = 7.342$  min,  $t_{minor} = 6.908$  min.

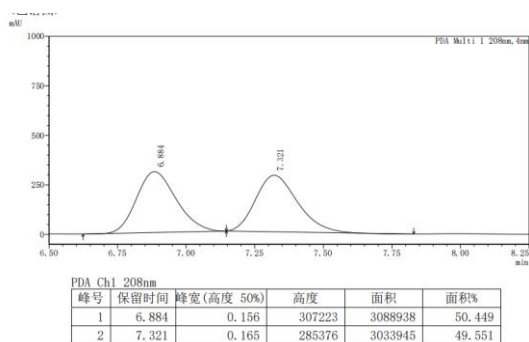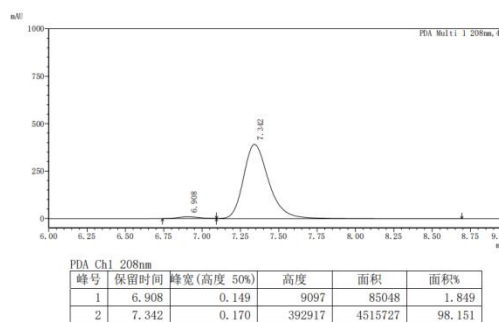

### Substrates and products for control experiments

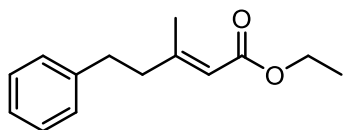

**Ester 9:** colorless oil. TLC analysis (hexanes/EtOAc 25:1)  $R_f = 0.42$ ;  **$^1H$  NMR** (400 MHz,  $CDCl_3$ )  $\delta$  7.33 – 7.07 (m, 5H), 5.68 (q,  $J = 1.3$  Hz, 1H), 4.14 (q,  $J = 7.2$  Hz, 2H), 2.81 – 2.73 (m, 2H), 2.43 (ddd,  $J = 9.1, 6.0, 1.2$  Hz, 2H), 2.20 (d,  $J = 1.3$  Hz, 3H), 1.26 (t,  $J = 7.1$  Hz, 3H).  **$^{13}C$  NMR** (101 MHz,  $CDCl_3$ )  $\delta$  166.8, 159.0, 141.2, 128.5, 128.3, 126.2, 116.1, 59.6, 42.8, 34.0, 19.0, 14.4. **ESI-HR** calcd for  $C_{14}H_{18}NaO_2^+$  ( $[M+Na]^+$ ) 241.1199, found 241.1191. **IR**  $\nu$  ( $cm^{-1}$ ) 2982, 2932, 1711, 1647, 1495, 697.

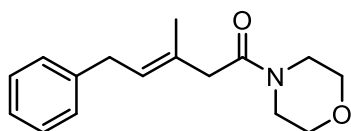

**amide 10:** pale yellow oil. TLC analysis (hexanes/EtOAc 1:1)  $R_f = 0.27$ ;  **$^1H$  NMR** (400 MHz,  $CDCl_3$ )  $\delta$  7.28 (t,  $J = 7.4$  Hz, 2H), 7.23 – 7.13 (m, 3H), 5.52 – 5.33 (m, 1H), 3.61 (q,  $J = 3.1, 2.7$  Hz, 4H), 3.51 (t,  $J = 4.7$  Hz, 2H), 3.44 – 3.37 (m, 4H), 3.11 (s, 2H), 1.81 (s, 3H).  **$^{13}C$  NMR** (101 MHz,  $CDCl_3$ )  $\delta$  169.7, 141.0, 130.3, 128.6, 128.4, 127.0, 126.1,

67.0, 66.7, 46.4, 44.7, 42.1, 34.5, 16.6. **ESI-HR** calcd for  $C_{16}H_{22}NO_2^+$  ( $[M+H]^+$ ) 260.1645, found 260.1639. **IR**  $\nu$  ( $cm^{-1}$ ) 2919, 2864, 1634, 1494, 1113, 699.

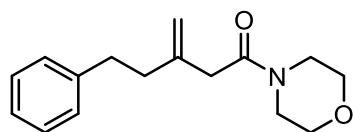

**amide 11:** pale yellow oil. TLC analysis (hexanes/EtOAc 1:1)  $R_f$  = 0.29;  **$^1H$  NMR** (400 MHz,  $CDCl_3$ )  $\delta$  7.32 – 7.16 (m, 5H), 4.98 (d,  $J$  = 1.7 Hz, 1H), 4.85 (s, 1H), 3.71 – 3.54 (m, 6H), 3.37 – 3.28 (m, 2H), 3.11 (s, 2H), 2.81 (dd,  $J$  = 9.2, 6.7 Hz, 2H), 2.42 (t,  $J$  = 8.0 Hz, 2H).  **$^{13}C$  NMR** (101 MHz,  $CDCl_3$ )  $\delta$  169.3, 142.9, 141.6, 128.5, 128.5, 126.1, 112.9, 67.0, 66.8, 46.5, 42.0, 42.0, 37.7, 34.1. **ESI-HR** calcd for  $C_{16}H_{22}NO_2^+$  ( $[M+H]^+$ ) 260.1645, found 260.1637. **IR**  $\nu$  ( $cm^{-1}$ ) 2919, 2856, 1632, 1425, 1433, 1114, 698.

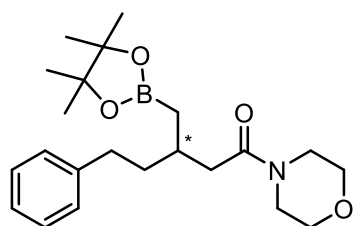

**Boration product 11b:** Following the general procedure, amide **9** (64.8 mg, 0.25 mmol) was converted to the boration product. Purification by silica gel chromatography gave 67.9 mg (70% yield) of **11b** as a colorless oil. TLC analysis (hexanes/EtOAc 1:1)  $R_f$  = 0.28;  **$^1H$  NMR** (400 MHz,  $CDCl_3$ )  $\delta$  7.27 – 7.02 (m, 5H), 3.68 – 3.23 (m, 8H), 2.64 (ddd,  $J$  = 13.6, 10.1, 5.5 Hz, 1H), 2.51 (ddd,  $J$  = 13.6, 10.0, 6.4 Hz, 1H), 2.36 (dd,  $J$  = 14.2, 6.6 Hz, 1H), 2.20 (dd,  $J$  = 14.2, 7.6 Hz, 1H), 2.03 (hept,  $J$  = 6.7 Hz, 1H), 1.73 – 1.62 (m, 1H), 1.58 – 1.47 (m, 1H), 1.17 (s, 12H), 0.91 (dd,  $J$  = 15.9, 5.5 Hz, 1H), 0.80 (dd,  $J$  = 15.9, 7.4 Hz, 1H).  **$^{13}C$  NMR** (101 MHz,  $CDCl_3$ )  $\delta$  171.5, 142.7, 128.5, 128.4, 125.8, 83.2, 67.0, 46.4, 42.1, 40.1, 38.3, 33.3, 31.5, 25.0, 25.0. **ESI-HR** calcd for  $C_{22}H_{35}BNO_4^+$  ( $[M+H]^+$ ) 388.2654, found 388.2646.  $[\alpha]_D^{20}$  = - 8.4 ( $c$  = 0.81,  $CHCl_3$ ) for a 76% *ee* sample. **IR**  $\nu$  ( $cm^{-1}$ ) 2976, 1642, 1144, 755. The enantiomeric purity of this compound was determined by HPLC analysis in comparison with authentic racemic material (Chiralpak AD, 98.0:2.0 hexanes:*i*-PrOH, 1.0 mL/min, 208 nm):  $t_{major}$  = 31.069 min,  $t_{minor}$  = 28.930 min.

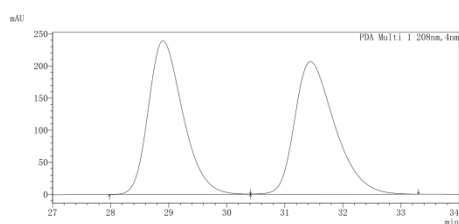

<Peak Results>

| Index | Time/min | Height/mAU | Quantity/Area | Area %/% |
|-------|----------|------------|---------------|----------|
| 1     | 28.902   | 238966     | 9864726       | 49.946   |
| 2     | 31.442   | 206430     | 9886070       | 50.054   |

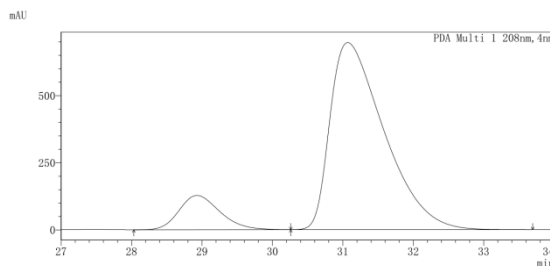

<Peak Results>

| Index | Time/min | Height/mAU | Quantity/Area | Area %/% |
|-------|----------|------------|---------------|----------|
| 1     | 28.930   | 127799     | 5172159       | 12.206   |
| 2     | 31.069   | 697061     | 37200149      | 87.794   |

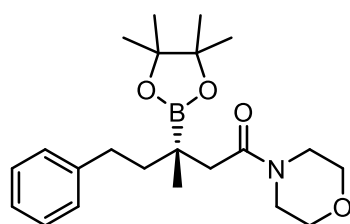

**Boration product (*R*)-3i:** Following the general procedure, amide **11** (64.8 mg, 0.25 mmol) was converted to the boration product. Purification by silica gel chromatography gave 11.6 mg (12% yield) of (*R*)-**3i** as a colorless oil. For a 70% *ee* sample. The enantiomeric purity of this compound was determined by HPLC analysis in comparison with authentic racemic material (Chiralpak AD, 99.0:1.0 hexanes:*i*-PrOH, 1.0 mL/min, 208 nm):  $t_{\text{major}} = 9.6069$  min,  $t_{\text{minor}} = 11.761$  min.

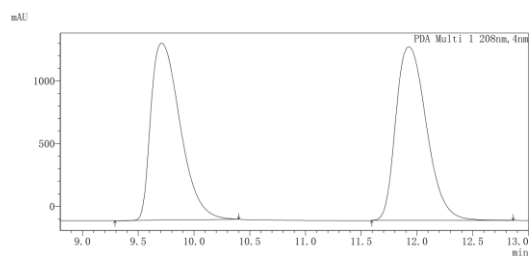

<Peak Results>

| Index | Time/min | Height/mAU | Quantity/Area | Area %/% |
|-------|----------|------------|---------------|----------|
| 1     | 9.710    | 1409752    | 25780618      | 49.334   |
| 2     | 11.926   | 1383030    | 26483345      | 50.666   |

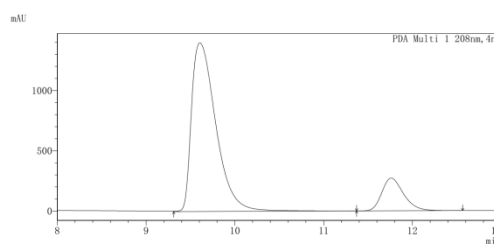

<Peak Results>

| Index | Time/min | Height/mAU | Quantity/Area | Area %/% |
|-------|----------|------------|---------------|----------|
| 1     | 9.606    | 1399338    | 26697618      | 85.224   |
| 2     | 11.761   | 271748     | 4628954       | 14.776   |

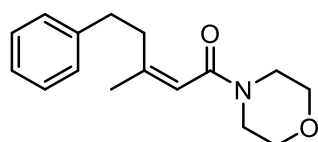

**Amide Z-1i:** Pale yellow oil. TLC analysis (hexanes/EtOAc 1:1)  $R_f = 0.28$   $^1\text{H NMR}$  (400 MHz,  $\text{CDCl}_3$ )  $\delta$  7.32 – 7.10 (m, 5H), 5.77 (d,  $J = 1.7$  Hz, 1H), 3.67 – 3.50 (m, 6H), 3.38 – 3.29 (m, 2H), 2.84 – 2.76 (m, 2H), 2.72 – 2.61 (m, 2H), 1.87 (d,  $J = 1.4$  Hz, 3H).  $^{13}\text{C NMR}$  (101 MHz,  $\text{CDCl}_3$ )  $\delta$  166.8, 149.7, 141.8, 128.5, 128.4, 126.0, 118.5, 77.5,

77.2, 76.8, 66.9, 66.8, 46.5, 41.6, 35.5, 34.2, 23.9. **ESI-HR** calcd for C<sub>16</sub>H<sub>22</sub>NO<sub>2</sub><sup>+</sup> ([M+H]<sup>+</sup>) 260.1645, found 260.1639. **IR**  $\nu$  (cm<sup>-1</sup>) 2971,2854,1621,1425,1113,698.

### General Information for Computation

All calculations were performed with the Gaussian 09 program. (Full citation of Gaussian 09: Frisch, M. J.; Trucks, G. W.; Schlegel, H. B.; Scuseria, G. E.; Robb, M. A.; Cheeseman, J. R.; Scalmani, G.; Barone, V.; Mennucci, B.; Petersson, G. A.; Nakatsuji, H.; Caricato, M.; Li, X.; Hratchian, H. P.; Izmaylov, A. F.; Bloino, J.; Zheng, G.; Sonnenberg, J. L.; Hada, M.; Ehara, M.; Toyota, K.; Fukuda, R.; Hasegawa, J.; Ishida, M.; Nakajima, T.; Honda, Y.; Kitao, O.; Nakai, H.; Vreven, T.; Montgomery, J. A., Jr.; Peralta, J. E.; Ogliaro, F.; Bearpark, M.; Heyd, J. J.; Brothers, E.; Kudin, K. N.; Staroverov, V. N.; Keith, T.; Kobayashi, R.; Normand, J.; Raghavachari, K.; Rendell, A.; Burant, J. C.; Iyengar, S. S.; Tomasi, J.; Cossi, M.; Rega, N.; Millam, J. M.; Klene, M.; Knox, J. E.; Cross, J. B.; Bakken, V.; Adamo, C.; Jaramillo, J.; Gomperts, R.; Stratmann, R. E.; Yazyev, O.; Austin, A. J.; Cammi, R.; Pomelli, C.; Ochterski, J. W.; Martin, R. L.; Morokuma, K.; Zakrzewski, V. G.; Voth, G. A.; Salvador, P.; Dannenberg, J. J.; Dapprich, S.; Daniels, A. D.; Farkas, O.; Foresman, J. B.; Ortiz, J. V.; Cioslowski, J.; Fox, D. J.; *Gaussian 09, revision B.01*; Gaussian Inc.: Wallingford, CT, 2010.) Density functional theory calculations using the M06 functional ((a) Zhao, Y.; Truhlar, D. G. *Theor. Chem. Acc.* **2008**, *120*, 215-241. (b) Zhao, Y.; Truhlar, D. G. *Acc. Chem. Res.* **2008**, *41*, 157-167.) Geometry optimizations were conducted with the Gaussian 09 software package, B3LYP functional, and LANL2DZ basis set for Rh and 6-31g(d,p) basis set for all other atoms. Single-point energy calculations were conducted with the M06 functional and SDD basis set for Rh and the 6-311++g(d,p) basis set for all other atoms, along with the SMD *o*-C<sub>6</sub>H<sub>4</sub>Cl<sub>2</sub> solvent correction. Thermal corrections were applied to the optimized geometries to provide Gibbs free energies.

The energy profile of catalytic hydroboration using DIOP ligand was computed. Extensive conformational searches were conducted for all intermediates and transition states, and the lowest energy conformers are shown in Supplementary Figure 3.

Computational results revealed that migratory insertion of the alkene into rhodium hydride has the highest activation barrier. Others steps have much lower activation

energies. To reveal the origin of enantioselectivity, the possible transition state structures for the migratory insertion were considered. The structures and energies were summarized in Supplementary Figure 4 and 5. The transition states leading to the *S*-enantiomer have activation energies of 21.0, 21.3 kcal/mol, respectively, while the transition states leading to the *R*-enantiomer have activation energies of 26.2, 23.4 kcal/mol, respectively. The lower activation energy of **TS-2** is consistent with the major enantiomer observed in the experiments.

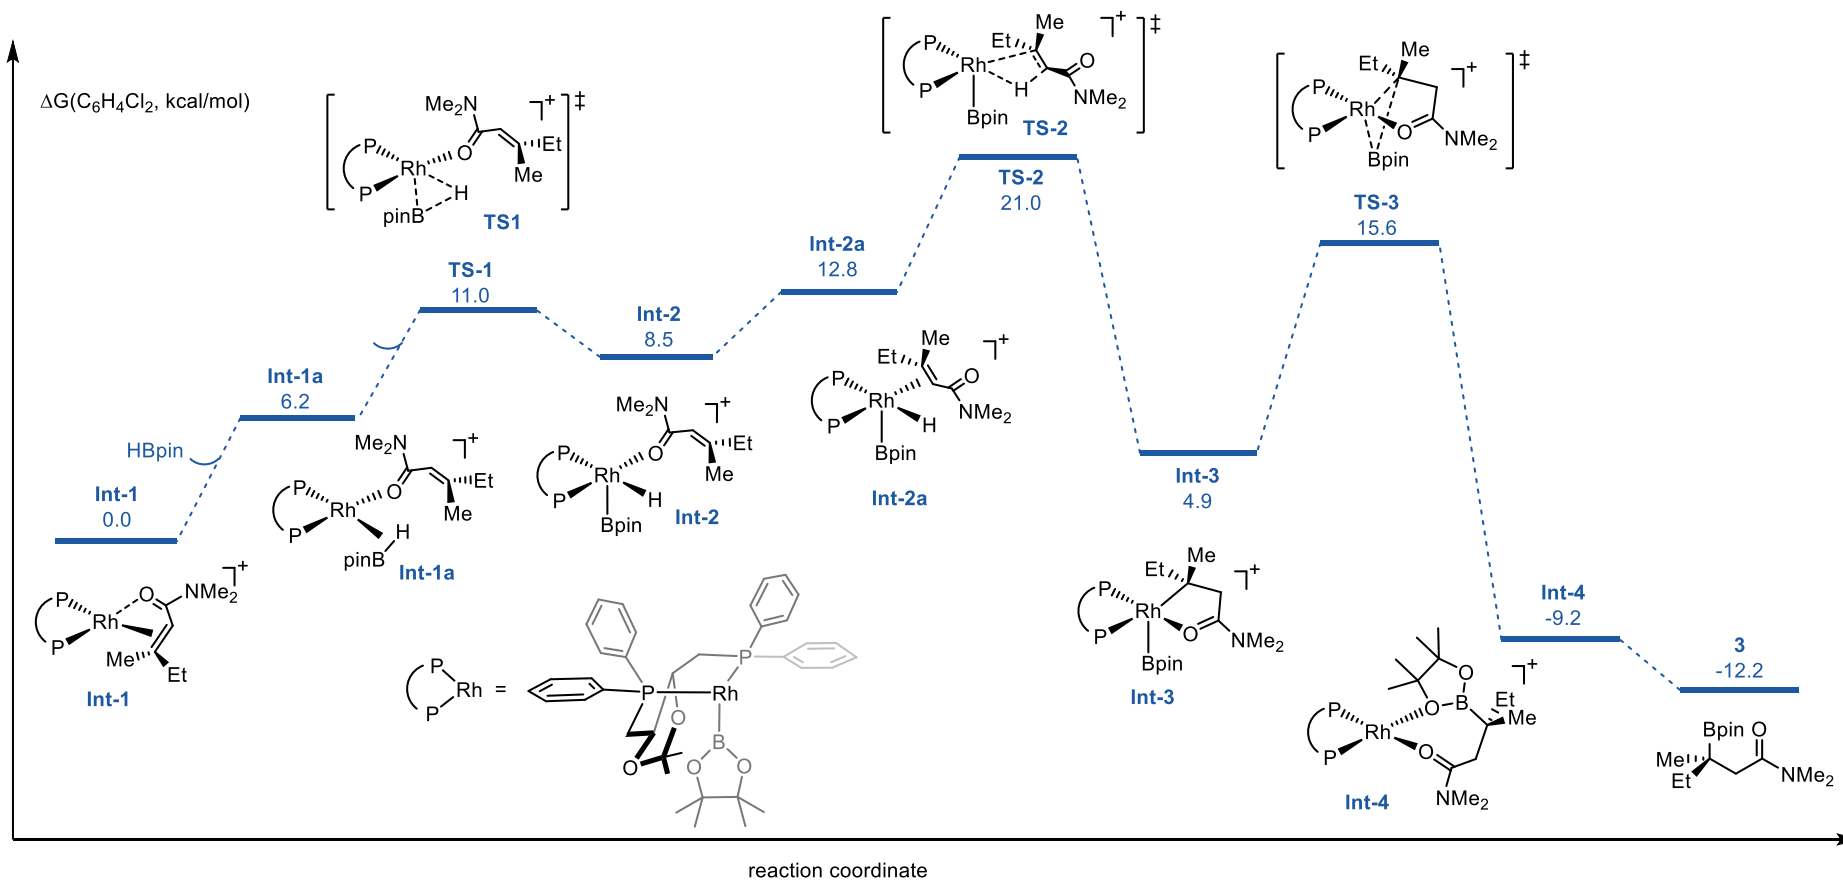

**Supplementary Figure 3.** Energy profile for Rh-DIOP catalyzed hydroboration. Gibbs free energies in *o*-C<sub>6</sub>H<sub>4</sub>Cl<sub>2</sub> (ΔG<sub>sol,298K</sub>) are reported.



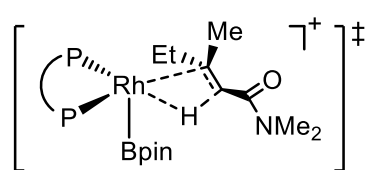

**TS-2**  
21.0 kcal/mol

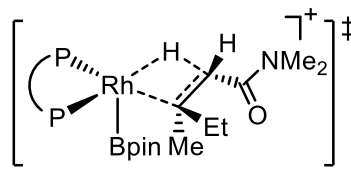

**TS-2-2**  
21.3 kcal/mol

**Supplementary Figure 4.** transition states of migratory insertion leading to the correct enantiomer

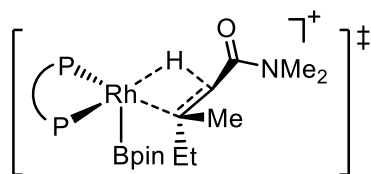

**TS-2-3**  
26.2 kcal/mol

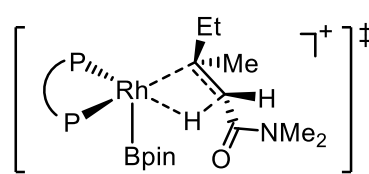

**TS-2'**  
23.4 kcal/mol

**Supplementary Figure 5.** transition states of migratory insertion leading to the opposite enantiomer

## Coordinates and Energies of Stationary Points

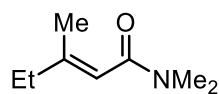

$G_{\text{sol}} = -443.4854871$  Hatree

|   |             |             |             |
|---|-------------|-------------|-------------|
| C | -1.46005500 | 0.04045000  | -0.28059000 |
| C | -0.24654000 | -0.42012700 | 0.08406300  |
| C | -2.65278100 | -0.89316800 | -0.24957600 |
| H | -2.32343600 | -1.90707500 | 0.00379900  |
| H | -3.08562500 | -0.94526300 | -1.25918300 |
| H | -0.17645100 | -1.46022100 | 0.39104200  |
| C | 0.99863500  | 0.39548100  | 0.15869800  |
| O | 0.97994200  | 1.61512500  | 0.34632100  |
| N | 2.19605700  | -0.28810400 | 0.05287700  |
| C | 3.43759900  | 0.43358800  | 0.28372200  |
| H | 4.02006700  | 0.52504800  | -0.64310000 |
| H | 4.05277800  | -0.09477400 | 1.02324500  |
| H | 3.19404100  | 1.42945700  | 0.64949400  |
| C | -1.74079100 | 1.44847700  | -0.73919900 |
| H | -2.22567700 | 2.01917300  | 0.06252000  |
| H | -0.83036400 | 1.98410700  | -1.00065700 |
| H | -2.43563900 | 1.43871800  | -1.58791700 |
| C | -3.75397100 | -0.45553900 | 0.73391900  |
| H | -4.58136000 | -1.17217500 | 0.72629100  |
| H | -3.36488600 | -0.39768400 | 1.75558800  |
| H | -4.16206100 | 0.52556000  | 0.47361200  |
| C | 2.34054100  | -1.67148000 | -0.36753700 |
| H | 2.60879300  | -2.33262700 | 0.46918300  |
| H | 1.42450200  | -2.03911300 | -0.82773000 |
| H | 3.13756500  | -1.74349500 | -1.11790600 |

### HBpin

$G_{\text{sol}} = -411.5602608$  Hatree

|   |             |             |             |
|---|-------------|-------------|-------------|
| C | 0.78913600  | -0.19125300 | 0.04531000  |
| C | -0.78913700 | -0.19124900 | -0.04531600 |
| B | -0.00000100 | 1.94515800  | -0.00003800 |
| H | -0.00001900 | 3.13323800  | -0.00000800 |
| O | -1.08513300 | 1.20021700  | -0.36874600 |
| O | 1.08514700  | 1.20023000  | 0.36865200  |
| C | 1.47927800  | -0.48198400 | -1.29370300 |
| H | 2.54701000  | -0.26824400 | -1.19527400 |
| H | 1.36273900  | -1.52889800 | -1.58915600 |
| H | 1.08169700  | 0.15079900  | -2.09199600 |
| C | 1.37896900  | -1.07502200 | 1.14266000  |

|   |             |             |             |
|---|-------------|-------------|-------------|
| H | 1.13832900  | -2.12875000 | 0.96668800  |
| H | 2.46787100  | -0.97331800 | 1.14742100  |
| H | 1.01097000  | -0.79345900 | 2.13077600  |
| C | -1.37900500 | -1.07509800 | -1.14258700 |
| H | -1.13832200 | -2.12880600 | -0.96656200 |
| H | -2.46791100 | -0.97343400 | -1.14729700 |
| H | -1.01107200 | -0.79358100 | -2.13074000 |
| C | -1.47925200 | -0.48188300 | 1.29372800  |
| H | -2.54696700 | -0.26803800 | 1.19534100  |
| H | -1.36280100 | -1.52880400 | 1.58919400  |
| H | -1.08157300 | 0.15087000  | 2.09199700  |

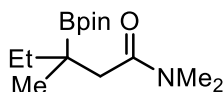

$G_{\text{sol}} = -855.0651241$  Hatree

|   |             |             |             |
|---|-------------|-------------|-------------|
| C | 0.66940700  | 1.47222100  | 0.27748200  |
| B | -0.60124900 | 0.52587900  | 0.14513400  |
| H | 1.79834700  | 0.68042600  | -1.40916600 |
| C | 0.35387200  | 2.74890000  | -0.56241800 |
| H | -0.55054300 | 3.21277700  | -0.14566200 |
| H | 0.09147700  | 2.43956100  | -1.58241100 |
| C | 1.90282600  | 0.75297000  | -0.31765700 |
| H | 2.81306300  | 1.33376800  | -0.12719300 |
| C | 2.06325200  | -0.66497000 | 0.23060100  |
| O | 1.15401300  | -1.18662600 | 0.88377700  |
| N | 3.22797500  | -1.34027500 | -0.02802300 |
| C | 3.40755900  | -2.68379000 | 0.50542100  |
| H | 4.32300900  | -2.73437100 | 1.10803100  |
| H | 3.49074000  | -3.41625800 | -0.30789600 |
| H | 2.54718000  | -2.92824700 | 1.12524200  |
| C | -2.11925100 | -0.89383900 | -0.80955500 |
| C | -2.72630800 | -0.24662500 | 0.50192500  |
| O | -0.94918100 | -0.06701500 | -1.05066500 |
| O | -1.57281400 | 0.39369600  | 1.10741600  |
| C | -3.74536500 | 0.86707400  | 0.22140400  |
| H | -3.96536600 | 1.38740100  | 1.15786300  |
| H | -4.68293900 | 0.47068100  | -0.18033900 |
| H | -3.34737600 | 1.60099900  | -0.48510900 |
| C | -3.01907600 | -0.82099900 | -2.04326400 |
| H | -3.93966200 | -1.39482200 | -1.89194400 |
| H | -2.49363400 | -1.24834000 | -2.90237900 |
| H | -3.28630500 | 0.20784700  | -2.29141000 |

|   |             |             |             |   |             |             |             |
|---|-------------|-------------|-------------|---|-------------|-------------|-------------|
| C | -3.30460200 | -1.24191200 | 1.50750700  | H | -3.61479900 | -5.58798700 | -1.65595000 |
| H | -4.15177400 | -1.78753700 | 1.07806900  | H | -2.01180200 | -5.66641200 | -0.89163300 |
| H | -3.66163800 | -0.70287700 | 2.38994300  | C | -3.19322600 | -3.29411500 | -3.15808200 |
| H | -2.55200600 | -1.96137200 | 1.83391200  | H | -2.92238700 | -3.82478300 | -4.07456200 |
| C | -1.61993600 | -2.33135900 | -0.60937900 | H | -2.99548300 | -2.22821000 | -3.29153800 |
| H | -1.08313300 | -2.64406000 | -1.51011000 | H | -4.26308800 | -3.43053500 | -2.97797200 |
| H | -2.44950600 | -3.02684100 | -0.44793900 | C | -2.33483900 | 0.93735400  | 1.85586400  |
| H | -0.92445800 | -2.39268300 | 0.22987300  | C | -3.55377400 | 1.63046000  | 1.82522300  |
| C | 0.92031900  | 1.83637500  | 1.75528700  | H | -4.10699200 | 1.72698900  | 0.89804400  |
| H | 1.06903700  | 0.93587500  | 2.35598400  | C | -4.06691000 | 2.21405600  | 2.98665600  |
| H | 1.80458100  | 2.47475000  | 1.87392200  | H | -5.01231700 | 2.74680000  | 2.94452600  |
| H | 0.06090700  | 2.36935100  | 2.17417400  | C | -3.37281500 | 2.11437100  | 4.19254700  |
| C | 1.45434000  | 3.81820300  | -0.63671600 | H | -3.77562500 | 2.56617100  | 5.09388800  |
| H | 2.36674400  | 3.43795700  | -1.10902900 | C | -2.15619200 | 1.42926700  | 4.23347800  |
| H | 1.11430400  | 4.67252000  | -1.23198800 | H | -1.60968400 | 1.34424300  | 5.16821100  |
| H | 1.72587300  | 4.19774900  | 0.35329100  | C | -1.63883600 | 0.85029500  | 3.07471600  |
| C | 4.32504600  | -0.84367000 | -0.84158300 | H | -0.68948700 | 0.32572200  | 3.12294300  |
| H | 4.07684500  | 0.10788400  | -1.30608400 | C | -2.76800800 | 0.36743000  | -1.00584200 |
| H | 5.23402700  | -0.71098000 | -0.23916800 | C | -2.32585900 | 0.98796200  | -2.18392900 |
| H | 4.55397600  | -1.56054000 | -1.64053900 | H | -1.28456100 | 1.28547300  | -2.26236500 |

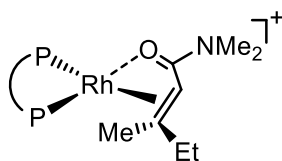

$G_{\text{tot}} = -2586.55418979$  Hartree

|    |             |             |             |   |             |             |             |
|----|-------------|-------------|-------------|---|-------------|-------------|-------------|
| Rh | 0.58054300  | 0.82035700  | -0.05253200 | H | -2.84026100 | 1.66787100  | -4.16271900 |
| P  | -1.57815500 | 0.11261800  | 0.37842200  | C | -4.52696700 | 0.77464300  | -3.16000900 |
| P  | 1.54289000  | -1.29962500 | 0.14346400  | H | -5.20888200 | 0.93297500  | -3.99000100 |
| O  | -0.98384100 | -3.56333700 | -2.16484200 | C | -4.97500200 | 0.14121100  | -1.99789700 |
| O  | -2.77509400 | -3.11475200 | -0.80055900 | H | -6.00374200 | -0.19825000 | -1.92490400 |
| C  | 0.87337800  | -2.64767600 | -0.95818000 | C | -4.10218600 | -0.06919700 | -0.93111200 |
| H  | 1.12008000  | -3.63585700 | -0.55992900 | H | -4.46642100 | -0.57797300 | -0.04515600 |
| H  | 1.41523300  | -2.55527900 | -1.90310500 | C | 1.55940300  | -1.95961300 | 1.86417400  |
| C  | -0.61439600 | -2.53835500 | -1.25119400 | C | 1.70895900  | -1.02981300 | 2.90837400  |
| H  | -0.81790900 | -1.55020200 | -1.68924200 | H | 1.76780400  | 0.02894600  | 2.66966300  |
| C  | -1.58347500 | -2.79034600 | -0.09324600 | C | 1.79056000  | -1.45480800 | 4.23465600  |
| H  | -1.23371200 | -3.67003800 | 0.47341900  | H | 1.91578900  | -0.72508000 | 5.02908000  |
| C  | -1.85588800 | -1.66195400 | 0.90540400  | C | 1.70902800  | -2.81575600 | 4.53840800  |
| H  | -2.88886800 | -1.75789000 | 1.25201500  | H | 1.76441100  | -3.14842500 | 5.57036300  |
| H  | -1.22090600 | -1.79556100 | 1.78559500  | C | 1.56074400  | -3.74758300 | 3.51033800  |
| C  | -2.38939400 | -3.83652000 | -1.98404200 | H | 1.50284900  | -4.80727000 | 3.73954000  |
| C  | -2.55777400 | -5.33847500 | -1.78001900 | C | 1.49516700  | -3.32550000 | 2.18049900  |
| H  | -2.16728700 | -5.88217100 | -2.64446400 | H | 1.40152400  | -4.07371800 | 1.40108100  |
|    |             |             |             | C | 3.32115300  | -1.29918100 | -0.35089900 |
|    |             |             |             | C | 4.35361000  | -1.53682100 | 0.56553100  |
|    |             |             |             | H | 4.12723800  | -1.73097100 | 1.60786700  |
|    |             |             |             | C | 5.68557300  | -1.53992900 | 0.14299400  |
|    |             |             |             | H | 6.47475900  | -1.73275100 | 0.86339300  |
|    |             |             |             | C | 6.00032600  | -1.30913000 | -1.19531900 |

|   |             |             |             |   |             |             |             |
|---|-------------|-------------|-------------|---|-------------|-------------|-------------|
| H | 7.03544900  | -1.32216300 | -1.52280500 | H | -3.06336900 | 2.14649900  | 0.57207300  |
| C | 4.97663000  | -1.06449200 | -2.11519500 | C | -3.04098600 | 0.45362600  | 1.89569400  |
| H | 5.21308900  | -0.88825200 | -3.16060100 | O | -1.86646300 | 0.04117000  | 1.71163000  |
| C | 3.64804400  | -1.05014800 | -1.69476300 | N | -3.68280800 | 0.08996700  | 3.03093300  |
| H | 2.86535400  | -0.84076200 | -2.41919100 | C | -3.01751600 | -0.82139400 | 3.96398900  |
| C | 0.19409900  | 3.29250300  | 0.40367800  | H | -3.78134700 | -1.36987400 | 4.52022400  |
| C | 0.60432700  | 2.99806400  | -0.88444600 | H | -2.39160700 | -0.26898400 | 4.67530100  |
| H | -0.08824500 | 3.17161700  | -1.70348900 | H | -2.39362900 | -1.52242000 | 3.41297200  |
| C | 2.02223300  | 2.67884700  | -1.21418700 | C | 0.86112200  | 4.18231500  | -0.80450400 |
| C | -1.20197300 | 3.85216400  | 0.59418800  | C | -0.70669600 | 4.04824200  | -0.91230600 |
| H | -1.88295600 | 3.41041200  | -0.13997500 | O | 1.24862100  | 2.84972500  | -0.34496900 |
| H | -1.57456700 | 3.57824900  | 1.58378200  | O | -0.99816000 | 3.00951900  | 0.08094400  |
| C | -1.23485800 | 5.38805900  | 0.45084200  | C | -1.48833900 | 5.30313000  | -0.53120300 |
| H | -0.91614100 | 5.70319700  | -0.54814600 | H | -2.56215900 | 5.11200300  | -0.61448200 |
| H | -2.25337600 | 5.75403900  | 0.60782400  | H | -1.24347600 | 6.13004100  | -1.20554900 |
| H | -0.59094400 | 5.88245700  | 1.18405100  | H | -1.27861000 | 5.61570600  | 0.49279100  |
| C | 1.12211500  | 3.44655000  | 1.58547300  | C | 1.32174000  | 5.16640700  | 0.27786000  |
| H | 2.12526500  | 3.06466800  | 1.39949700  | H | 1.13708200  | 6.20353400  | -0.01614400 |
| H | 1.19403800  | 4.50997500  | 1.85017700  | H | 2.39555800  | 5.03901000  | 0.43677500  |
| H | 0.70588300  | 2.93475100  | 2.45879500  | H | 0.81673100  | 4.97952300  | 1.22955900  |
| O | 2.51025100  | 1.68750300  | -0.59591100 | C | -1.17858900 | 3.52249800  | -2.27246500 |
| N | 2.71674900  | 3.36260100  | -2.13329600 | H | -1.04391000 | 4.27146600  | -3.05769300 |
| C | 2.22924000  | 4.58572900  | -2.76630100 | H | -2.24465900 | 3.28435300  | -2.21348500 |
| H | 2.97659300  | 5.37732200  | -2.65098700 | H | -0.64074600 | 2.61626700  | -2.56257200 |
| H | 2.05763200  | 4.42419400  | -3.83614400 | C | 1.58000600  | 4.47015900  | -2.12005600 |
| H | 1.30291200  | 4.91829800  | -2.30025700 | H | 2.65799500  | 4.52408700  | -1.94453000 |
| C | 4.06838400  | 2.93736600  | -2.50438700 | H | 1.26122500  | 5.43249000  | -2.53294000 |
| H | 4.14673900  | 2.89675300  | -3.59521700 | H | 1.39530100  | 3.69385000  | -2.86477400 |
| H | 4.80635800  | 3.65246800  | -2.12532100 | P | -0.32280700 | -1.80376300 | -0.33975600 |
| H | 4.26662100  | 1.95440200  | -2.08191300 | P | 2.39666800  | 0.14961200  | 0.56575600  |

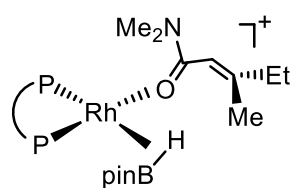

$G_{\text{sol}} = -2998.10449558$  Hatree

|    |             |            |             |   |            |             |             |
|----|-------------|------------|-------------|---|------------|-------------|-------------|
| Rh | 0.12556600  | 0.23943200 | 0.84814600  | O | 1.58272000 | -2.50105600 | -3.33636800 |
| C  | -4.85535200 | 1.07981000 | 0.24029200  | C | 2.99519900 | 0.14927600  | -1.18726400 |
| C  | -3.69582600 | 1.31930900 | 0.88438000  | H | 4.02391700 | -0.21278200 | -1.26629300 |
| H  | 0.29375400  | 1.77774100 | 1.54552500  | H | 2.98564000 | 1.20002300  | -1.48799100 |
| C  | -5.32060500 | 2.02630300 | -0.84693900 | C | 2.09093500 | -0.61711700 | -2.14649700 |
| H  | -5.41587500 | 1.46138600 | -1.78498700 | H | 1.07420900 | -0.20603200 | -2.08003000 |
| H  | -4.55534300 | 2.79190900 | -1.01404000 | C | 2.03052500 | -2.14859200 | -2.03223200 |
| B  | 0.16233300  | 2.28774800 | 0.28976500  | H | 3.05240600 | -2.53032500 | -1.87000300 |
|    |             |            |             | C | 1.11131300 | -2.80115300 | -0.98835300 |
|    |             |            |             | H | 0.73644400 | -3.73864100 | -1.40846600 |
|    |             |            |             | H | 1.70272300 | -3.06229200 | -0.10881200 |
|    |             |            |             | C | 2.15210300 | -1.56228700 | -4.26462700 |
|    |             |            |             | C | 3.36672900 | -2.16335800 | -4.96399900 |
|    |             |            |             | H | 3.84858500 | -1.41244000 | -5.59598700 |

|   |             |             |             |
|---|-------------|-------------|-------------|
| H | 3.06462600  | -3.00737400 | -5.58952900 |
| H | 4.09488400  | -2.51268700 | -4.22747300 |
| C | 1.05745000  | -1.12192500 | -5.22815300 |
| H | 1.45792300  | -0.40411100 | -5.94888800 |
| H | 0.23600700  | -0.65663500 | -4.67845900 |
| H | 0.66596200  | -1.98442500 | -5.77439500 |
| C | -1.22222600 | -3.04772200 | 0.68536900  |
| C | -2.61561300 | -3.18763100 | 0.58767900  |
| H | -3.17084000 | -2.59643100 | -0.13228700 |
| C | -3.29533700 | -4.09766400 | 1.39926800  |
| H | -4.37193800 | -4.20353000 | 1.30166100  |
| C | -2.59590700 | -4.87721900 | 2.32181700  |
| H | -3.12444800 | -5.59040500 | 2.94710900  |
| C | -1.21098200 | -4.73930800 | 2.43187300  |
| H | -0.65802500 | -5.34529000 | 3.14358300  |
| C | -0.52797800 | -3.82915500 | 1.62393300  |
| H | 0.54745100  | -3.73586200 | 1.73344400  |
| C | -1.41480200 | -1.54087900 | -1.79554700 |
| C | -1.93250400 | -0.26615400 | -2.06341700 |
| H | -1.69266700 | 0.55977700  | -1.40208700 |
| C | -2.75068700 | -0.05798700 | -3.17724700 |
| H | -3.13831600 | 0.93551700  | -3.38163000 |
| C | -3.06399100 | -1.12064900 | -4.02526600 |
| H | -3.69869800 | -0.95841000 | -4.89141700 |
| C | -2.55609400 | -2.39568100 | -3.76072300 |
| H | -2.79512100 | -3.22540500 | -4.41896300 |
| C | -1.73341300 | -2.60565400 | -2.65580600 |
| H | -1.34399300 | -3.60094400 | -2.46800300 |
| C | 3.10958400  | -1.35099000 | 1.37884500  |
| C | 2.46583200  | -1.85762600 | 2.52005300  |
| H | 1.53448000  | -1.40739600 | 2.85447500  |
| C | 3.01147700  | -2.93014600 | 3.22804800  |
| H | 2.50521100  | -3.30519700 | 4.11268000  |
| C | 4.20419900  | -3.51670100 | 2.80051400  |
| H | 4.62825400  | -4.35262700 | 3.34829400  |
| C | 4.85394300  | -3.01893400 | 1.66972400  |
| H | 5.78559000  | -3.46554400 | 1.33580000  |
| C | 4.31613400  | -1.93907700 | 0.96728500  |
| H | 4.85385400  | -1.55849100 | 0.10552600  |
| C | 3.36850200  | 1.48111400  | 1.39238100  |
| C | 3.01014800  | 1.86278700  | 2.69409900  |
| H | 2.14536200  | 1.41322100  | 3.17341600  |
| C | 3.75086200  | 2.82526700  | 3.37862200  |
| H | 3.46111900  | 3.11202000  | 4.38512000  |
| C | 4.85903500  | 3.41969700  | 2.77107300  |

|   |             |             |             |
|---|-------------|-------------|-------------|
| H | 5.43503700  | 4.17082900  | 3.30294200  |
| C | 5.22561400  | 3.04105500  | 1.47929400  |
| H | 6.08812100  | 3.49581300  | 1.00125500  |
| C | 4.48768200  | 2.07447200  | 0.79275300  |
| H | 4.79379300  | 1.79853900  | -0.21024400 |
| C | -5.73908100 | -0.11711400 | 0.49038000  |
| H | -5.27124600 | -0.86008100 | 1.13865200  |
| H | -6.69123200 | 0.17986600  | 0.94603500  |
| H | -5.99019500 | -0.59991700 | -0.46131300 |
| C | -6.66598300 | 2.71145800  | -0.54335100 |
| H | -6.61255400 | 3.29090800  | 0.38402200  |
| H | -6.93244200 | 3.39786900  | -1.35221400 |
| H | -7.48089300 | 1.98824000  | -0.44545100 |
| C | -4.90038200 | 0.72509800  | 3.53070600  |
| H | -5.20728400 | 1.52741600  | 2.86403600  |
| H | -5.71263900 | -0.00439200 | 3.61711200  |
| H | -4.70739000 | 1.14598400  | 4.52371800  |

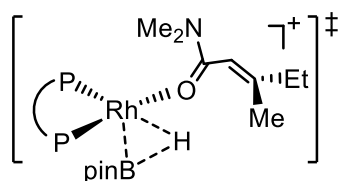

$$G_{\text{sol}} = -2998.09695195 \text{ Hartree}$$

|    |             |             |             |
|----|-------------|-------------|-------------|
| Rh | 0.11115500  | 0.17037300  | -0.77514200 |
| B  | 0.25348800  | 1.95221000  | 0.15796600  |
| H  | 0.38224700  | 1.54203500  | -1.55048500 |
| C  | 4.01624300  | 0.90636600  | -0.76281000 |
| C  | 5.80207600  | 1.81057900  | 0.69452700  |
| H  | 6.05314500  | 1.32855100  | 1.65005100  |
| H  | 5.02231300  | 2.54881100  | 0.90769300  |
| C  | 5.25515000  | 0.75994300  | -0.24993300 |
| H  | 3.39066000  | 1.72885000  | -0.42548200 |
| C  | 3.27483200  | -0.07161100 | -1.59609800 |
| O  | 2.16163100  | -0.50807000 | -1.18922500 |
| N  | 3.77378200  | -0.52055700 | -2.76841800 |
| C  | 3.05355000  | -1.55074000 | -3.51859700 |
| H  | 3.78143000  | -2.20600100 | -4.00471800 |
| H  | 2.42162200  | -1.09734900 | -4.29215400 |
| H  | 2.43169500  | -2.13329700 | -2.84235900 |
| C  | -0.30277400 | 3.92659800  | 1.19785200  |
| C  | 1.17361900  | 3.51469700  | 1.56538000  |
| O  | -0.82017400 | 2.68914800  | 0.60702800  |
| O  | 1.45982100  | 2.47565700  | 0.56878200  |
| C  | 2.20891800  | 4.62530700  | 1.41064100  |

|   |             |             |             |   |             |             |             |
|---|-------------|-------------|-------------|---|-------------|-------------|-------------|
| H | 3.20093900  | 4.24620100  | 1.67310900  | C | 0.80001700  | -4.83398000 | -2.07928400 |
| H | 1.98460000  | 5.45912300  | 2.08367100  | H | 0.51724800  | -5.06112700 | -3.10323000 |
| H | 2.24814900  | 5.00491800  | 0.38823000  | C | 0.30431200  | -3.68483000 | -1.46257300 |
| C | -0.38831200 | 5.00400800  | 0.11089400  | H | -0.35898800 | -3.02644500 | -2.01681300 |
| H | -0.08256200 | 5.98242400  | 0.49233600  | C | 0.84517300  | -1.67532000 | 2.21555900  |
| H | -1.42245700 | 5.07948400  | -0.23482300 | C | 2.09916800  | -1.04100100 | 2.15873400  |
| H | 0.23773900  | 4.75540400  | -0.75031700 | H | 2.46483800  | -0.65536600 | 1.21349900  |
| C | 1.29896600  | 2.85798200  | 2.94438800  | C | 2.87424000  | -0.91064200 | 3.31058200  |
| H | 1.16427200  | 3.58745200  | 3.74808500  | H | 3.84372500  | -0.42415300 | 3.25280000  |
| H | 2.29513900  | 2.41942400  | 3.04305600  | C | 2.40684300  | -1.39859500 | 4.53302300  |
| H | 0.56731000  | 2.05673200  | 3.07578400  | H | 3.01073300  | -1.29398900 | 5.42955300  |
| C | -1.18626500 | 4.29777900  | 2.38557200  | C | 1.15856900  | -2.01820800 | 4.59846000  |
| H | -2.18927200 | 4.55467600  | 2.03338000  | H | 0.78604800  | -2.39534400 | 5.54624200  |
| H | -0.78317300 | 5.17037500  | 2.90936200  | C | 0.37870900  | -2.16011500 | 3.44766600  |
| H | -1.27716400 | 3.47446900  | 3.09595400  | H | -0.59810500 | -2.62169800 | 3.52566300  |
| P | -0.08496800 | -1.87734700 | 0.64324100  | C | -2.77968500 | -0.86286000 | -2.06489400 |
| P | -2.12211400 | 0.53025300  | -1.04493300 | C | -2.06128200 | -1.20431900 | -3.22513700 |
| O | -3.42370300 | 0.29318700  | 2.82354800  | H | -1.14775800 | -0.66844300 | -3.47028200 |
| O | -2.82148400 | -1.89282500 | 3.14460200  | C | -2.51520800 | -2.21452600 | -4.07247700 |
| C | -3.15502000 | 0.64669500  | 0.49088000  | H | -1.95371900 | -2.45902500 | -4.96934500 |
| H | -4.19693600 | 0.37994300  | 0.29293500  | C | -3.69160400 | -2.90523900 | -3.77145300 |
| H | -3.12733200 | 1.70762200  | 0.74761700  | H | -4.04641800 | -3.69177400 | -4.43022100 |
| C | -2.63796100 | -0.11760800 | 1.70695300  | C | -4.41331500 | -2.57393100 | -2.62476400 |
| H | -1.58279900 | 0.14054800  | 1.87273600  | H | -5.33250600 | -3.10108900 | -2.38780100 |
| C | -2.81671700 | -1.64303600 | 1.74124700  | C | -3.96439100 | -1.55666100 | -1.77847000 |
| H | -3.80710700 | -1.89067000 | 1.32508800  | H | -4.55478400 | -1.31022400 | -0.90282500 |
| C | -1.77800000 | -2.54676200 | 1.06147100  | C | -2.64461300 | 2.00339900  | -2.02749400 |
| H | -1.67437000 | -3.46063800 | 1.65429300  | C | -1.81060600 | 2.51948500  | -3.02941100 |
| H | -2.16458900 | -2.85880200 | 0.08654900  | H | -0.82293100 | 2.09655200  | -3.18015800 |
| C | -3.46281200 | -0.77728500 | 3.78509200  | C | -2.23250100 | 3.58559100  | -3.82427400 |
| C | -4.92374700 | -1.09568300 | 4.08986700  | H | -1.57273300 | 3.97587600  | -4.59347500 |
| H | -5.42645700 | -0.21042300 | 4.48855100  | C | -3.49221700 | 4.15301100  | -3.62721600 |
| H | -4.99117200 | -1.89998300 | 4.82704300  | H | -3.81820000 | 4.98628500  | -4.24220700 |
| H | -5.44567200 | -1.40671900 | 3.18118600  | C | -4.33185000 | 3.64327400  | -2.63615300 |
| C | -2.65970400 | -0.40850000 | 5.02551500  | H | -5.31438600 | 4.07690100  | -2.47621400 |
| H | -3.11393000 | 0.45244000  | 5.52264000  | C | -3.91527100 | 2.57211400  | -1.84466000 |
| H | -1.63250100 | -0.16024000 | 4.74914700  | H | -4.59159400 | 2.19180500  | -1.08699800 |
| H | -2.64156800 | -1.24635000 | 5.72829300  | C | 6.15635200  | -0.42110800 | -0.51250100 |
| C | 0.64881600  | -3.38319100 | -0.13455100 | H | 5.64605800  | -1.23961900 | -1.02288200 |
| C | 1.50799500  | -4.24750500 | 0.55850600  | H | 7.02439400  | -0.13148500 | -1.11674700 |
| H | 1.78649100  | -4.03159100 | 1.58442300  | H | 6.55417500  | -0.80519200 | 0.43380200  |
| C | 2.00921500  | -5.39254700 | -0.06496500 | C | 7.05565600  | 2.53052900  | 0.16288400  |
| H | 2.67280600  | -6.05451500 | 0.48352100  | H | 6.84750600  | 3.03262900  | -0.78754300 |
| C | 1.65659200  | -5.68925000 | -1.38195000 | H | 7.38789200  | 3.28936200  | 0.87712400  |
| H | 2.04449100  | -6.58252600 | -1.86230700 | H | 7.88938500  | 1.83964900  | 0.00670200  |

|   |             |             |             |   |            |             |             |
|---|-------------|-------------|-------------|---|------------|-------------|-------------|
| C | 4.91139400  | 0.07645500  | -3.46584500 | H | 1.70811400 | 2.00214800  | -4.00042000 |
| H | 5.25352900  | 0.96372800  | -2.93843000 | P | 1.37485400 | -1.48694300 | 0.54463800  |
| H | 5.73693900  | -0.63810100 | -3.54921400 | P | 0.27525700 | 1.94517700  | 1.03417000  |
| H | 4.59996500  | 0.36301300  | -4.47618500 | O | 3.83528800 | 2.01043300  | -1.00394600 |
|   |             |             |             | O | 4.68341800 | 0.06683400  | -0.14258200 |
|   |             |             |             | C | 1.90710600 | 2.46060600  | 0.30676200  |
|   |             |             |             | H | 2.46253200 | 3.08282200  | 1.01572000  |
|   |             |             |             | H | 1.62219900 | 3.10445900  | -0.52869300 |
| C | 2.79758600  | 1.36223500  | -0.27035100 |   |            |             |             |
| H | 2.19942300  | 0.73466000  | -0.94438700 |   |            |             |             |
| C | 3.59690100  | 0.46909700  | 0.68955700  |   |            |             |             |
| H | 3.98566400  | 1.09033800  | 1.51289500  |   |            |             |             |
| C | 2.93280300  | -0.77292200 | 1.30017800  |   |            |             |             |
| H | 3.68859400  | -1.55997200 | 1.38524700  |   |            |             |             |
| H | 2.62143700  | -0.54214800 | 2.32329700  |   |            |             |             |
| C | 5.00008400  | 1.16667000  | -1.01179400 |   |            |             |             |
| C | 6.17792800  | 1.96749400  | -0.46397200 |   |            |             |             |
| H | 6.34580100  | 2.85635600  | -1.07800900 |   |            |             |             |
| H | 7.08656300  | 1.35979800  | -0.46893400 |   |            |             |             |
| H | 5.97655600  | 2.29154000  | 0.56041500  |   |            |             |             |
| C | 5.24956000  | 0.61667100  | -2.41022400 |   |            |             |             |
| H | 5.47396500  | 1.43479200  | -3.09940200 |   |            |             |             |
| H | 4.36636700  | 0.08203000  | -2.76795400 |   |            |             |             |
| H | 6.09791600  | -0.07356100 | -2.40126400 |   |            |             |             |
| C | 1.03708600  | -2.80511000 | 1.79606600  |   |            |             |             |
| C | 1.51440800  | -4.11702800 | 1.66001500  |   |            |             |             |
| H | 2.08698900  | -4.39918700 | 0.78257000  |   |            |             |             |
| C | 1.25532200  | -5.06827400 | 2.64899500  |   |            |             |             |
| H | 1.63194500  | -6.08021300 | 2.53216500  |   |            |             |             |
| C | 0.52056400  | -4.72165300 | 3.78430900  |   |            |             |             |
| H | 0.32225500  | -5.46320100 | 4.55241900  |   |            |             |             |
| C | 0.04402800  | -3.41694100 | 3.93006300  |   |            |             |             |
| H | -0.52486600 | -3.13891200 | 4.81255100  |   |            |             |             |
| C | 0.29609600  | -2.46604100 | 2.94020800  |   |            |             |             |
| H | -0.08008300 | -1.45413700 | 3.06765900  |   |            |             |             |
| C | 1.87076300  | -2.42427800 | -0.95656500 |   |            |             |             |
| C | 0.85679600  | -3.09012500 | -1.66903000 |   |            |             |             |
| H | -0.17413200 | -2.99539900 | -1.34549700 |   |            |             |             |
| C | 1.17160300  | -3.86643100 | -2.78312000 |   |            |             |             |
| H | 0.38158800  | -4.38474300 | -3.31923000 |   |            |             |             |
| C | 2.49679400  | -3.97395500 | -3.21374600 |   |            |             |             |
| H | 2.74072000  | -4.57730400 | -4.08311600 |   |            |             |             |
| C | 3.50426800  | -3.29976600 | -2.52416900 |   |            |             |             |
| H | 4.53547500  | -3.37334600 | -2.85677600 |   |            |             |             |
| C | 3.19871400  | -2.53021500 | -1.39749000 |   |            |             |             |

G<sub>tot</sub> = -2998.10091930 Hartree

|    |             |             |             |
|----|-------------|-------------|-------------|
| Rh | -0.67951500 | 0.00365200  | 0.30130100  |
| C  | -5.04262000 | -0.67712100 | -0.33125400 |
| C  | -3.85979600 | -1.10180800 | -0.81701700 |
| H  | -2.01049800 | 0.82383400  | 0.16916900  |
| C  | -5.76917400 | 0.45955000  | -1.02145900 |
| H  | -6.79520000 | 0.13488700  | -1.24424900 |
| H  | -5.28874500 | 0.66164600  | -1.98464100 |
| B  | -0.63463300 | 0.62064900  | -1.59900800 |
| H  | -3.40532500 | -0.58665200 | -1.65896900 |
| C  | -2.96743100 | -2.13457100 | -0.23795300 |
| O  | -1.76588000 | -1.86110300 | 0.05190800  |
| N  | -3.40076900 | -3.39865200 | -0.04184100 |
| C  | -2.52208000 | -4.37685100 | 0.60483400  |
| H  | -1.97173400 | -4.96067900 | -0.14222000 |
| H  | -3.13602100 | -5.05945700 | 1.19819700  |
| H  | -1.80890800 | -3.86732400 | 1.24880700  |
| C  | -0.40902000 | 1.92073800  | -3.48286400 |
| C  | -0.71991100 | 0.42652900  | -3.88391600 |
| O  | -0.07865300 | 1.79150400  | -2.05801300 |
| O  | -1.15911100 | -0.15383900 | -2.60672900 |
| C  | -1.84476300 | 0.24793900  | -4.90003300 |
| H  | -2.01049400 | -0.81790000 | -5.07975900 |
| H  | -1.57916000 | 0.71077700  | -5.85588500 |
| H  | -2.78354500 | 0.68423700  | -4.55417900 |
| C  | -1.62775900 | 2.84544000  | -3.57142100 |
| H  | -1.89489800 | 3.05488500  | -4.61101700 |
| H  | -1.39323800 | 3.79325500  | -3.08029800 |
| H  | -2.49877500 | 2.41013700  | -3.07315300 |
| C  | 0.52002400  | -0.35517500 | -4.32865400 |
| H  | 0.87977900  | -0.00887900 | -5.30178200 |
| H  | 0.26744200  | -1.41443800 | -4.41281100 |
| H  | 1.33449100  | -0.26488400 | -3.60524200 |
| C  | 0.78539100  | 2.55184100  | -4.19266400 |
| H  | 0.92392200  | 3.57733700  | -3.83897100 |
| H  | 0.61835200  | 2.59065700  | -5.27385600 |

|   |             |             |             |   |             |             |             |
|---|-------------|-------------|-------------|---|-------------|-------------|-------------|
| H | 3.99398500  | -2.00158500 | -0.88510300 | H | -1.33893500 | -0.96603400 | -1.91725100 |
| C | 0.50192100  | 1.69933100  | 2.84692000  | C | 0.26669100  | -3.10499200 | -2.73423000 |
| C | -0.63865800 | 1.31937600  | 3.57990900  | H | -0.81079900 | -3.25895400 | -2.85524700 |
| H | -1.59298500 | 1.20631300  | 3.07128900  | H | 0.53344400  | -3.41936800 | -1.71864300 |
| C | -0.56045600 | 1.10772600  | 4.95591000  | B | -0.65870500 | 1.22694300  | -1.51380700 |
| H | -1.45094100 | 0.82433800  | 5.50909700  | H | 2.18982300  | -1.75452100 | -1.53936500 |
| C | 0.65745200  | 1.26945200  | 5.62167800  | C | 2.31615000  | 0.20339700  | -2.56897700 |
| H | 0.71883100  | 1.10673400  | 6.69327900  | O | 1.67604800  | 1.26415800  | -2.64032600 |
| C | 1.79253000  | 1.65073500  | 4.90618500  | N | 3.65701400  | 0.16213400  | -2.80630700 |
| H | 2.73965100  | 1.78770700  | 5.41926400  | C | 4.37072000  | 1.40441300  | -3.09266000 |
| C | 1.71662500  | 1.86653900  | 3.52730300  | H | 4.64025000  | 1.46038900  | -4.15411500 |
| H | 2.61042500  | 2.17516300  | 2.99597400  | H | 5.28831600  | 1.44392900  | -2.49680100 |
| C | -0.66565200 | 3.53047200  | 0.97386000  | H | 3.73143200  | 2.24754700  | -2.84258600 |
| C | -1.79052600 | 3.69831900  | 0.15800200  | C | -1.41164500 | 2.98787300  | -2.79076700 |
| H | -2.14505500 | 2.86877800  | -0.44065000 | C | -1.02506200 | 3.49477900  | -1.33302700 |
| C | -2.45251900 | 4.92705100  | 0.11279500  | O | -1.36084900 | 1.52650700  | -2.64950800 |
| H | -3.32526800 | 5.04408400  | -0.52279700 | O | -0.39205400 | 2.31452000  | -0.72720800 |
| C | -1.99810100 | 5.99870400  | 0.88169200  | C | -0.00943700 | 4.63514000  | -1.29774500 |
| H | -2.51539900 | 6.95275500  | 0.84728700  | H | 0.23006300  | 4.87770400  | -0.25862800 |
| C | -0.87832200 | 5.83937200  | 1.70093300  | H | -0.41901000 | 5.53503600  | -1.76713000 |
| H | -0.52274700 | 6.66692300  | 2.30722700  | H | 0.91514500  | 4.36549300  | -1.81031500 |
| C | -0.21645900 | 4.61336200  | 1.74933700  | C | -0.40532800 | 3.37527800  | -3.87887200 |
| H | 0.64165900  | 4.50099700  | 2.40551700  | H | -0.41249700 | 4.45527700  | -4.05293600 |
| C | -5.70928700 | -1.23844600 | 0.89872100  | H | -0.69224500 | 2.88452800  | -4.81346700 |
| H | -5.09731100 | -1.97933500 | 1.41562100  | H | 0.60491100  | 3.05502200  | -3.62544700 |
| H | -5.93749000 | -0.43710700 | 1.60937800  | C | -2.22855400 | 3.84275800  | -0.45093000 |
| H | -6.66970700 | -1.70156000 | 0.63856100  | H | -2.71305100 | 4.76497600  | -0.78388300 |
| C | -5.83144700 | 1.76122900  | -0.20047400 | H | -1.89077200 | 3.98501700  | 0.57941100  |
| H | -4.82679200 | 2.11983500  | 0.04574300  | H | -2.97778900 | 3.04660600  | -0.45870900 |
| H | -6.34192100 | 2.54238200  | -0.77144500 | C | -2.82354600 | 3.35911100  | -3.24484300 |
| H | -6.38133800 | 1.63013700  | 0.73596000  | H | -3.00724200 | 2.93603900  | -4.23635000 |
| C | -4.63073700 | -3.94826400 | -0.61033000 | H | -2.93335900 | 4.44546600  | -3.32062500 |
| H | -5.11225600 | -3.21299600 | -1.25060900 | H | -3.59028300 | 2.97885100  | -2.56804200 |
| H | -4.38499900 | -4.83253800 | -1.20823200 | P | 1.46278700  | -0.45224300 | 1.13744600  |
| H | -5.32407300 | -4.24945100 | 0.18199800  | P | -2.16176200 | -0.59877600 | 0.50826500  |
|   |             |             |             | O | -1.30059900 | 2.41857600  | 3.16665400  |
|   |             |             |             | O | 0.57184300  | 1.41655800  | 4.03664900  |
|   |             |             |             | C | -2.28993000 | 0.72802300  | 1.80872700  |
|   |             |             |             | H | -2.96416800 | 0.40837100  | 2.60970700  |
|   |             |             |             | H | -2.79420000 | 1.55270200  | 1.29827600  |
|   |             |             |             | C | -0.98357200 | 1.27575500  | 2.37197900  |
|   |             |             |             | H | -0.33406300 | 1.57590800  | 1.54137200  |
|   |             |             |             | C | -0.19770900 | 0.42242300  | 3.37251600  |
|   |             |             |             | H | -0.90475900 | -0.03590300 | 4.08548600  |
|   |             |             |             | C | 0.72197600  | -0.68033200 | 2.84269800  |

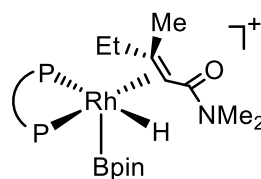

$G_{\text{sol}} = -2998.09409854$  Hartree

|    |             |             |             |
|----|-------------|-------------|-------------|
| Rh | -0.25510700 | -0.65750200 | -0.84697600 |
| C  | 0.59115300  | -1.62912600 | -2.92424700 |
| C  | 1.63855300  | -1.08383200 | -2.19084800 |



|   |             |             |             |   |             |             |             |
|---|-------------|-------------|-------------|---|-------------|-------------|-------------|
| H | 1.52800400  | -0.82922200 | 3.56660900  | C | -4.02387700 | -0.12527700 | -1.60043000 |
| H | 0.16467100  | -1.61905900 | 2.79738100  | H | -3.17388800 | 0.11232300  | -2.22887000 |
| C | -0.22144000 | 2.61603300  | 4.10196200  | C | -5.31617000 | -0.03695500 | -2.12635800 |
| C | -0.82597800 | 2.78634300  | 5.49117800  | H | -5.45132200 | 0.25241100  | -3.16421700 |
| H | -1.50382100 | 3.64414200  | 5.50556100  | C | -6.42423300 | -0.31880900 | -1.32849200 |
| H | -0.03722600 | 2.94967900  | 6.23010700  | H | -7.42583500 | -0.25191700 | -1.74231700 |
| H | -1.39229500 | 1.89422500  | 5.77087900  | C | -6.24235200 | -0.69222700 | 0.00554400  |
| C | 0.65412600  | 3.78742800  | 3.67548400  | H | -7.09986800 | -0.91909200 | 0.63165300  |
| H | 0.08482000  | 4.71959500  | 3.72308500  | C | -4.95726600 | -0.78379300 | 0.53559400  |
| H | 1.01331600  | 3.63749400  | 2.65466700  | H | -4.83295700 | -1.09470600 | 1.56858000  |
| H | 1.51966700  | 3.87131000  | 4.33827100  | C | 0.06149800  | -0.99331500 | -4.18951900 |
| C | 2.49804900  | -1.98770800 | 1.05899200  | H | 0.08340900  | 0.09250800  | -4.14257400 |
| C | 3.88640800  | -1.96201600 | 0.85771100  | H | 0.68571500  | -1.32055700 | -5.03133600 |
| H | 4.40924400  | -1.01363600 | 0.79956000  | H | -0.96130100 | -1.31876500 | -4.39324500 |
| C | 4.61073400  | -3.15281500 | 0.74972400  | C | 1.01417500  | -4.00100300 | -3.74317200 |
| H | 5.68663100  | -3.11362200 | 0.60585300  | H | 2.09912400  | -3.89050300 | -3.64822300 |
| C | 3.96190700  | -4.38448500 | 0.83809600  | H | 0.76802400  | -5.05120200 | -3.56220900 |
| H | 4.52796900  | -5.30770400 | 0.76113700  | H | 0.73629100  | -3.76854800 | -4.77472100 |
| C | 2.57873500  | -4.42222400 | 1.03060700  | C | 4.45557900  | -1.05118700 | -2.94068900 |
| H | 2.06423900  | -5.37578700 | 1.10586300  | H | 3.83310500  | -1.94207000 | -2.89621100 |
| C | 1.85191300  | -3.23577300 | 1.13300800  | H | 4.97055700  | -1.04564000 | -3.90828700 |
| H | 0.77586800  | -3.29108900 | 1.27570800  | H | 5.21312000  | -1.10954400 | -2.15061600 |
| C | 2.66513100  | 0.92218300  | 1.36201400  |   |             |             |             |
| C | 2.68637200  | 1.99128900  | 0.45520400  |   |             |             |             |
| H | 1.99190300  | 2.01324600  | -0.37537600 |   |             |             |             |
| C | 3.58993400  | 3.04377800  | 0.63306100  |   |             |             |             |
| H | 3.59380900  | 3.87055300  | -0.07132300 |   |             |             |             |
| C | 4.47646600  | 3.03790400  | 1.70920900  |   |             |             |             |
| H | 5.17681100  | 3.85686700  | 1.84448400  |   |             |             |             |
| C | 4.45788600  | 1.97668800  | 2.61907500  |   |             |             |             |
| H | 5.14136600  | 1.96851800  | 3.46278100  |   |             |             |             |
| C | 3.55595800  | 0.92871900  | 2.45087700  |   |             |             |             |
| H | 3.55503800  | 0.11543700  | 3.16956300  |   |             |             |             |
| C | -2.22193900 | -2.23412100 | 1.35984400  |   |             |             |             |
| C | -2.08073400 | -3.38235700 | 0.55892700  |   |             |             |             |
| H | -1.93696000 | -3.27767600 | -0.51266100 |   |             |             |             |
| C | -2.14836100 | -4.65628300 | 1.12286200  |   |             |             |             |
| H | -2.04718400 | -5.53203200 | 0.48878300  |   |             |             |             |
| C | -2.35589300 | -4.80473300 | 2.49636100  |   |             |             |             |
| H | -2.41036100 | -5.79575100 | 2.93613200  |   |             |             |             |
| C | -2.50283200 | -3.67359200 | 3.29963000  |   |             |             |             |
| H | -2.67304300 | -3.78071000 | 4.36660500  |   |             |             |             |
| C | -2.43887400 | -2.39624400 | 2.73679800  |   |             |             |             |
| H | -2.56565200 | -1.53512100 | 3.38357100  |   |             |             |             |
| C | -3.83495500 | -0.49908300 | -0.26321000 |   |             |             |             |

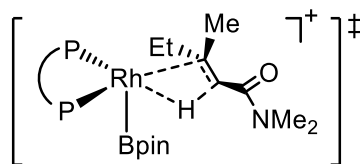

$G_{sol} = -2998.08101372$  Hartree

|    |             |             |             |
|----|-------------|-------------|-------------|
| Rh | 0.68665100  | 0.45260900  | -0.16942700 |
| C  | 1.35234600  | 2.35089700  | -1.31158300 |
| C  | 2.45171000  | 1.43165100  | -1.31360200 |
| H  | 2.19481500  | 0.08341200  | -0.57449200 |
| C  | 0.60921300  | 2.60413500  | -2.61758800 |
| H  | -0.42252800 | 2.88992100  | -2.38753200 |
| H  | 0.57012600  | 1.68312800  | -3.20293800 |
| B  | 0.46879100  | -0.91849000 | -1.64391000 |
| H  | 2.63161500  | 0.92185900  | -2.25568000 |
| C  | 3.65501600  | 1.70846000  | -0.42059800 |
| O  | 3.54039100  | 1.62139300  | 0.80923500  |
| N  | 4.82608300  | 2.05450500  | -1.01836500 |
| C  | 5.99810600  | 2.31602900  | -0.18260200 |
| H  | 6.27670800  | 3.37465100  | -0.23659500 |
| H  | 6.84301400  | 1.71546000  | -0.53623200 |
| H  | 5.76439200  | 2.05629500  | 0.84723600  |

|   |             |             |             |   |             |             |             |
|---|-------------|-------------|-------------|---|-------------|-------------|-------------|
| C | 0.40178900  | -2.95526800 | -2.71461900 | H | -2.80424300 | 3.73301000  | -0.75644700 |
| C | 0.55731700  | -1.79969800 | -3.77847800 | C | -2.28185800 | 5.30733400  | 0.60810100  |
| O | 0.03582800  | -2.21139800 | -1.50028900 | H | -2.76365500 | 6.07462200  | 0.00937000  |
| O | 0.86525500  | -0.63550200 | -2.93120900 | C | -1.65436000 | 5.64537200  | 1.80745600  |
| C | 1.70770900  | -1.97766700 | -4.76616300 | H | -1.64418000 | 6.67666600  | 2.14666300  |
| H | 1.75196200  | -1.11629000 | -5.43841600 | C | -1.03990600 | 4.64960400  | 2.56994400  |
| H | 1.55501300  | -2.87177700 | -5.37863800 | H | -0.54868900 | 4.90386900  | 3.50448800  |
| H | 2.67068800  | -2.06579100 | -4.26048800 | C | -1.05044100 | 3.32456900  | 2.13503200  |
| C | 1.71372600  | -3.68300200 | -2.40132600 | H | -0.54812100 | 2.57275200  | 2.73697900  |
| H | 2.02975800  | -4.31026100 | -3.23950200 | C | -2.95242300 | 1.12981100  | -0.92365600 |
| H | 1.56970300  | -4.32611400 | -1.52987800 | C | -2.59512000 | 0.87244500  | -2.25404800 |
| H | 2.52050100  | -2.98325100 | -2.16757400 | H | -1.55615300 | 0.69253200  | -2.50423300 |
| C | -0.73591400 | -1.48095300 | -4.53345000 | C | -3.56529200 | 0.85221900  | -3.25970000 |
| H | -0.98474900 | -2.27682900 | -5.24092800 | H | -3.27338400 | 0.65500200  | -4.28675900 |
| H | -0.60095300 | -0.55548500 | -5.10055700 | C | -4.90284900 | 1.08934800  | -2.94397100 |
| H | -1.58051500 | -1.34941700 | -3.85376200 | H | -5.65785900 | 1.07597100  | -3.72423500 |
| C | -0.70499200 | -3.96568500 | -3.00413000 | C | -5.26941900 | 1.34508800  | -1.61978200 |
| H | -0.75040500 | -4.70121600 | -2.19657400 | H | -6.30956400 | 1.52786900  | -1.36782600 |
| H | -0.50334800 | -4.50393000 | -3.93575700 | C | -4.30373000 | 1.36393700  | -0.61520600 |
| H | -1.68398700 | -3.49018300 | -3.07984800 | H | -4.60950400 | 1.55914000  | 0.40617500  |
| P | -1.65154100 | 1.21005300  | 0.37343800  | C | 0.75140700  | -0.61240900 | 3.08307800  |
| P | 0.70022400  | -1.36929100 | 1.39784500  | C | 1.54037900  | 0.53997300  | 3.25523400  |
| O | -2.97381800 | -3.07890900 | 0.80515400  | H | 2.10281000  | 0.95299000  | 2.42168800  |
| O | -4.14289300 | -1.18617700 | 1.36375700  | C | 1.64124600  | 1.14461100  | 4.51041200  |
| C | -0.71917200 | -2.56733400 | 1.38660600  | H | 2.26214600  | 2.02768200  | 4.62957300  |
| H | -0.83018600 | -3.06156200 | 2.35562600  | C | 0.95687700  | 0.61453500  | 5.60554200  |
| H | -0.43875500 | -3.32668400 | 0.65602400  | H | 1.03547700  | 1.08651400  | 6.58018800  |
| C | -2.05331000 | -1.99690500 | 0.92309400  | C | 0.17877200  | -0.53309700 | 5.44464600  |
| H | -1.91535400 | -1.51676800 | -0.05369700 | H | -0.34783300 | -0.95882700 | 6.29351100  |
| C | -2.81326500 | -1.05167600 | 1.85611400  | C | 0.07888500  | -1.14613400 | 4.19426700  |
| H | -2.75561700 | -1.44152000 | 2.88623800  | H | -0.52106900 | -2.04502100 | 4.10406900  |
| C | -2.42061000 | 0.42578200  | 1.89153600  | C | 2.18596000  | -2.46789500 | 1.40015000  |
| H | -3.30389000 | 1.00669900  | 2.17160500  | C | 3.45475400  | -1.88431300 | 1.25364500  |
| H | -1.68798500 | 0.57553800  | 2.68808000  | H | 3.55030100  | -0.81081300 | 1.11931900  |
| C | -4.30559600 | -2.54154000 | 0.90743400  | C | 4.60416000  | -2.67268100 | 1.30403100  |
| C | -5.07336100 | -3.36603000 | 1.93478600  | H | 5.57912500  | -2.20650500 | 1.19590300  |
| H | -5.11042900 | -4.41444700 | 1.62662300  | C | 4.50545400  | -4.05249200 | 1.49610500  |
| H | -6.09601800 | -2.99251000 | 2.03270100  | H | 5.40132100  | -4.66490900 | 1.53123800  |
| H | -4.58243400 | -3.30961400 | 2.90969800  | C | 3.24983000  | -4.63853100 | 1.65145700  |
| C | -4.97526600 | -2.50730700 | -0.46087300 | H | 3.16209900  | -5.70907400 | 1.81096700  |
| H | -5.11682200 | -3.52469300 | -0.83505000 | C | 2.09585800  | -3.85232200 | 1.61029100  |
| H | -4.35816600 | -1.94859500 | -1.16847200 | H | 1.13516500  | -4.33496400 | 1.75003900  |
| H | -5.95188900 | -2.02037400 | -0.39287500 | C | 1.38031700  | 3.53235600  | -0.35442500 |
| C | -1.69066600 | 2.97235600  | 0.93397200  | H | 1.65994300  | 3.25215100  | 0.66151200  |
| C | -2.30196100 | 3.98006900  | 0.17235800  | H | 2.12187600  | 4.26705300  | -0.69765900 |

|   |            |            |             |
|---|------------|------------|-------------|
| H | 0.41414300 | 4.03606500 | -0.32879200 |
| C | 1.24011300 | 3.72353500 | -3.47108500 |
| H | 2.27352400 | 3.48730200 | -3.74739700 |
| H | 0.67270300 | 3.85208100 | -4.39793500 |
| H | 1.24340700 | 4.68544200 | -2.95068200 |
| C | 5.03427800 | 2.26184100 | -2.44718400 |
| H | 4.11350700 | 2.13204600 | -3.01035200 |
| H | 5.40022500 | 3.27948400 | -2.62583200 |
| H | 5.78375700 | 1.55893100 | -2.82933600 |

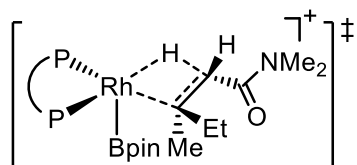

$G_{\text{sol}} = -2998.08053795$  Hartree

|    |             |             |             |
|----|-------------|-------------|-------------|
| Rh | 0.70776700  | 0.45611800  | 0.54503500  |
| C  | 2.85153900  | 1.16437300  | 0.63869100  |
| C  | 2.02706800  | 2.25165400  | 1.08787900  |
| H  | 0.44608600  | 1.95622200  | 1.08305400  |
| C  | 3.51492600  | 0.31659200  | 1.72566400  |
| H  | 3.75054400  | -0.67020100 | 1.31378000  |
| H  | 2.81788400  | 0.15531100  | 2.56028100  |
| B  | 0.12637600  | 1.16400900  | -1.27696000 |
| H  | 1.98452600  | 2.39229400  | 2.16570300  |
| C  | 1.90983900  | 3.51776000  | 0.25381500  |
| O  | 1.44035900  | 3.46638600  | -0.88578300 |
| N  | 2.35640600  | 4.67782100  | 0.81159400  |
| C  | 2.19157300  | 5.92891500  | 0.07139800  |
| H  | 3.16944400  | 6.36630800  | -0.15813900 |
| H  | 1.62045500  | 6.64528800  | 0.67247800  |
| H  | 1.66098600  | 5.72416100  | -0.85516000 |
| C  | -1.12653000 | 2.17968100  | -2.91766900 |
| C  | 0.18013000  | 1.50979200  | -3.55603300 |
| O  | -0.99211200 | 1.90069700  | -1.48506100 |
| O  | 0.78904100  | 0.79713600  | -2.41696200 |
| C  | -0.10384000 | 0.47007300  | -4.64259700 |
| H  | 0.83823500  | 0.02266100  | -4.97331700 |
| H  | -0.56745300 | 0.93994300  | -5.51522400 |
| H  | -0.76159400 | -0.32941900 | -4.29638800 |
| C  | -2.44801500 | 1.54983400  | -3.36834900 |
| H  | -2.64047700 | 1.75612100  | -4.42554300 |
| H  | -3.26335400 | 1.98447500  | -2.78422700 |
| H  | -2.46487400 | 0.46798000  | -3.22169100 |
| C  | 1.22545300  | 2.50775900  | -4.06216400 |

|   |             |             |             |
|---|-------------|-------------|-------------|
| H | 0.84360400  | 3.07402000  | -4.91677400 |
| H | 2.11096400  | 1.95800200  | -4.39461100 |
| H | 1.52721100  | 3.20304200  | -3.27917700 |
| C | -1.20546600 | 3.69985600  | -3.07028000 |
| H | -2.09786500 | 4.06109600  | -2.55197800 |
| H | -1.28744500 | 3.98687000  | -4.12313200 |
| H | -0.33594200 | 4.18827100  | -2.63081800 |
| P | -1.57602900 | 0.05455500  | 1.27505800  |
| P | 1.13565700  | -1.80016800 | -0.34764500 |
| O | -2.32081200 | -2.25587500 | -2.53718000 |
| O | -3.65046500 | -2.39898800 | -0.68523500 |
| C | -0.10710000 | -2.32155200 | -1.63571400 |
| H | -0.09234300 | -3.40951900 | -1.74478900 |
| H | 0.24406800  | -1.90085000 | -2.57977500 |
| C | -1.54024000 | -1.84031700 | -1.41554000 |
| H | -1.55844500 | -0.74475600 | -1.36006700 |
| C | -2.30413900 | -2.42335100 | -0.21502000 |
| H | -1.99139300 | -3.46676000 | -0.05774400 |
| C | -2.22166400 | -1.70086200 | 1.14021200  |
| H | -3.20907000 | -1.74980100 | 1.60924200  |
| H | -1.54329800 | -2.25519900 | 1.79326700  |
| C | -3.61932100 | -2.69563100 | -2.08547000 |
| C | -3.74459100 | -4.19894600 | -2.33127700 |
| H | -3.62830000 | -4.41423500 | -3.39665900 |
| H | -4.72474400 | -4.55686600 | -2.00513100 |
| H | -2.97253200 | -4.74951100 | -1.78723800 |
| C | -4.71153400 | -1.89190700 | -2.77436200 |
| H | -5.69462800 | -2.19763100 | -2.40589200 |
| H | -4.67674800 | -2.06284800 | -3.85322500 |
| H | -4.57361900 | -0.82633300 | -2.57950100 |
| C | -1.58735800 | 0.21380200  | 3.12014800  |
| C | -0.39607900 | 0.39451200  | 3.83578300  |
| H | 0.54664200  | 0.47668600  | 3.30168100  |
| C | -0.40285200 | 0.48781100  | 5.22933300  |
| H | 0.52968100  | 0.62892900  | 5.76804200  |
| C | -1.60909600 | 0.40534800  | 5.92495700  |
| H | -1.61966700 | 0.48055800  | 7.00801300  |
| C | -2.80511100 | 0.23438500  | 5.22312700  |
| H | -3.74765500 | 0.17958800  | 5.75936500  |
| C | -2.79610000 | 0.14097400  | 3.83207700  |
| H | -3.73602200 | 0.03045900  | 3.29962300  |
| C | -2.95136300 | 1.17374900  | 0.79307700  |
| C | -4.15149000 | 0.70246000  | 0.24501000  |
| H | -4.28804500 | -0.35272600 | 0.03621900  |
| C | -5.18271300 | 1.59887400  | -0.05558800 |

|   |             |             |             |
|---|-------------|-------------|-------------|
| H | -6.10963100 | 1.22354400  | -0.47929500 |
| C | -5.02727600 | 2.96160200  | 0.19264400  |
| H | -5.83214000 | 3.65358000  | -0.03663400 |
| C | -3.83060700 | 3.43508900  | 0.74021500  |
| H | -3.70230400 | 4.49556400  | 0.93544000  |
| C | -2.79791200 | 2.54881900  | 1.03166900  |
| H | -1.86722200 | 2.92936300  | 1.44231800  |
| C | 1.02625000  | -3.11211200 | 0.95005000  |
| C | 1.09309400  | -2.75863900 | 2.30595800  |
| H | 1.18616800  | -1.71551300 | 2.58957000  |
| C | 1.03311100  | -3.73170400 | 3.30656200  |
| H | 1.07989400  | -3.43558100 | 4.35011500  |
| C | 0.90964500  | -5.07762300 | 2.96213400  |
| H | 0.86059600  | -5.83664200 | 3.73681900  |
| C | 0.85468600  | -5.44664500 | 1.61548200  |
| H | 0.76814500  | -6.49352700 | 1.34079100  |
| C | 0.91577400  | -4.47414500 | 0.61781200  |
| H | 0.89640000  | -4.78690300 | -0.42149100 |
| C | 2.73051300  | -2.20409100 | -1.18990100 |
| C | 3.71781800  | -2.97055000 | -0.54909400 |
| H | 3.54187900  | -3.37244600 | 0.44267800  |
| C | 4.92922300  | -3.24357400 | -1.18848300 |
| H | 5.67887000  | -3.84326300 | -0.68091500 |
| C | 5.17053200  | -2.75923300 | -2.47405200 |
| H | 6.10911300  | -2.97958000 | -2.97336000 |
| C | 4.19883900  | -1.98696100 | -3.11415100 |
| H | 4.38189300  | -1.59962500 | -4.11205900 |
| C | 2.99137600  | -1.70158600 | -2.47671500 |
| H | 2.26672600  | -1.06288700 | -2.96845400 |
| C | 3.63004600  | 1.26401300  | -0.65888800 |
| H | 3.03731200  | 1.69059300  | -1.46477700 |
| H | 4.51502800  | 1.89868300  | -0.51168400 |
| H | 3.98561200  | 0.28116300  | -0.97111600 |
| C | 4.81196200  | 0.93017800  | 2.28995600  |
| H | 4.62988800  | 1.90430400  | 2.75651400  |
| H | 5.24079600  | 0.27366600  | 3.05303800  |
| H | 5.56416900  | 1.06573800  | 1.50821800  |
| C | 2.96386400  | 4.81072900  | 2.13291100  |
| H | 3.44702200  | 3.88737200  | 2.44861100  |
| H | 3.73767000  | 5.58200500  | 2.08658200  |
| H | 2.22937400  | 5.11275100  | 2.89090300  |

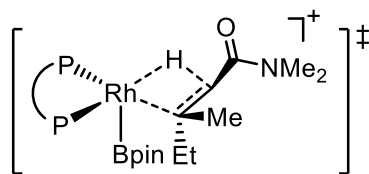

$G_{sol} = -2998.07276588$  Hartree

|    |             |             |             |
|----|-------------|-------------|-------------|
| Rh | -0.39967800 | 0.13354400  | 0.75564300  |
| C  | -0.46773500 | 1.51144000  | 2.62520700  |
| C  | -1.30991800 | 0.36324500  | 2.80420600  |
| H  | -1.74529400 | -0.37670800 | 1.44339200  |
| C  | -1.15279600 | 2.85703000  | 2.40536400  |
| H  | -2.08639400 | 2.70291400  | 1.86157800  |
| H  | -0.51104000 | 3.48149100  | 1.77320100  |
| B  | -1.70794500 | 1.26123400  | -0.28854600 |
| H  | -2.37712900 | 0.53906500  | 2.91857200  |
| C  | -0.69321100 | -0.85459800 | 3.45899300  |
| O  | 0.22339400  | -1.42591900 | 2.83012900  |
| N  | -1.12223500 | -1.26550400 | 4.67043800  |
| C  | -0.54109400 | -2.46251100 | 5.27855900  |
| H  | -1.32407000 | -3.20715800 | 5.45937100  |
| H  | -0.07540000 | -2.20685300 | 6.23614300  |
| H  | 0.21036900  | -2.87387900 | 4.60838000  |
| C  | -3.75842400 | 2.11555800  | -0.91185600 |
| C  | -2.60120400 | 2.85891300  | -1.69013900 |
| O  | -3.01998500 | 1.37183800  | 0.11399500  |
| O  | -1.43699700 | 2.00283900  | -1.41195400 |
| C  | -2.78758200 | 2.94049300  | -3.20357800 |
| H  | -1.91358300 | 3.41986200  | -3.65303900 |
| H  | -3.66518600 | 3.54673200  | -3.44935600 |
| H  | -2.91279500 | 1.95688400  | -3.65840600 |
| C  | -4.50594000 | 1.07530200  | -1.75449700 |
| H  | -5.14058700 | 1.55134200  | -2.50755300 |
| H  | -5.14499000 | 0.48094500  | -1.09618500 |
| H  | -3.81789200 | 0.39544800  | -2.26381100 |
| C  | -2.27129300 | 4.24950000  | -1.13757400 |
| H  | -3.07339500 | 4.96064100  | -1.35496300 |
| H  | -1.35311400 | 4.61172100  | -1.60579000 |
| H  | -2.11101400 | 4.22979000  | -0.05750800 |
| C  | -4.76019800 | 3.03126900  | -0.21203400 |
| H  | -5.49122800 | 2.42662700  | 0.33173700  |
| H  | -5.30473700 | 3.63875700  | -0.94184000 |
| H  | -4.27572800 | 3.70075100  | 0.50049700  |
| P  | 1.66607700  | 0.97887900  | -0.35590000 |
| P  | -0.81537000 | -1.79807300 | -0.66543300 |
| O  | 2.99531400  | -3.31126700 | -0.56019400 |

|   |             |             |             |   |             |             |             |
|---|-------------|-------------|-------------|---|-------------|-------------|-------------|
| O | 3.82666700  | -1.57042200 | -1.78645300 | C | -1.44271000 | -0.72544600 | -4.63424900 |
| C | 0.64573200  | -2.95428800 | -0.53665000 | H | -1.48595800 | 0.19045500  | -5.21642100 |
| H | 0.57909000  | -3.69767600 | -1.33557500 | C | -1.60558700 | -1.95981500 | -5.26002200 |
| H | 0.56446300  | -3.48770200 | 0.41332500  | H | -1.77562300 | -2.01216200 | -6.33109800 |
| C | 2.01460700  | -2.27966900 | -0.57438200 | C | -1.55321500 | -3.13214700 | -4.50075900 |
| H | 2.12466000  | -1.65686700 | 0.31998200  | H | -1.68670200 | -4.09829400 | -4.97788800 |
| C | 2.40794400  | -1.46057500 | -1.82086500 | C | -1.32990900 | -3.06697700 | -3.12715000 |
| H | 2.01214400  | -1.96581400 | -2.71725500 | H | -1.30848800 | -3.98911100 | -2.55420900 |
| C | 2.04187600  | 0.03104600  | -1.92311700 | C | -2.20047100 | -2.80974700 | 0.02509700  |
| H | 2.87056100  | 0.52231900  | -2.44221800 | C | -3.45019400 | -2.86067600 | -0.61010200 |
| H | 1.15383900  | 0.13788300  | -2.54869700 | H | -3.60405000 | -2.35261500 | -1.55582000 |
| C | 4.14838100  | -2.88165100 | -1.31524600 | C | -4.50562700 | -3.57538200 | -0.03968600 |
| C | 4.34902500  | -3.85084900 | -2.47918100 | H | -5.46522800 | -3.60914400 | -0.54687900 |
| H | 4.49434300  | -4.86646500 | -2.10138100 | C | -4.32732900 | -4.25004700 | 1.16806100  |
| H | 5.22718700  | -3.56479400 | -3.06424500 | H | -5.14589400 | -4.81420400 | 1.60455700  |
| H | 3.47524600  | -3.85264200 | -3.13627600 | C | -3.08868400 | -4.19754500 | 1.81112500  |
| C | 5.36513700  | -2.78076600 | -0.40764400 | H | -2.93990500 | -4.72431600 | 2.74939300  |
| H | 5.61576000  | -3.76657400 | -0.00726500 | C | -2.03433800 | -3.47645200 | 1.25076700  |
| H | 5.15828900  | -2.09947900 | 0.41972100  | H | -1.08775400 | -3.42360800 | 1.77874400  |
| H | 6.22401600  | -2.40326900 | -0.96943300 | C | 0.85505300  | 1.61198700  | 3.36412400  |
| C | 1.67986300  | 2.72988700  | -0.94387600 | H | 0.68160900  | 2.03197600  | 4.36372300  |
| C | 1.84122700  | 3.75858000  | 0.00003500  | H | 1.35285500  | 0.65456600  | 3.49150500  |
| H | 1.99516700  | 3.51675300  | 1.04677100  | H | 1.54468700  | 2.28644800  | 2.85350200  |
| C | 1.84643200  | 5.09623600  | -0.39315700 | C | -1.46306800 | 3.62261000  | 3.70791000  |
| H | 1.98393000  | 5.87517400  | 0.35095900  | H | -2.01474600 | 4.53924000  | 3.47825900  |
| C | 1.69281400  | 5.43145300  | -1.74041800 | H | -2.08540600 | 3.02646900  | 4.38543100  |
| H | 1.70769800  | 6.47208700  | -2.04984900 | H | -0.55826600 | 3.91250800  | 4.24844600  |
| C | 1.53186600  | 4.41913000  | -2.68671400 | C | -2.16005200 | -0.60133300 | 5.45448500  |
| H | 1.42244100  | 4.66841400  | -3.73816600 | H | -1.80717500 | -0.47014400 | 6.48224200  |
| C | 1.52052500  | 3.07889900  | -2.29244200 | H | -2.39076400 | 0.38311700  | 5.05194800  |
| H | 1.38894600  | 2.31609100  | -3.05050900 | H | -3.07627100 | -1.20275300 | 5.47898500  |
| C | 3.25295900  | 0.88156100  | 0.59518500  |   |             |             |             |
| C | 3.35910200  | 0.07510700  | 1.73797900  |   |             |             |             |
| H | 2.50019000  | -0.48508400 | 2.09333400  |   |             |             |             |
| C | 4.56944000  | -0.02186700 | 2.42886400  |   |             |             |             |
| H | 4.63415200  | -0.64812100 | 3.31379700  |   |             |             |             |
| C | 5.68853900  | 0.68278700  | 1.98418600  |   |             |             |             |
| H | 6.62885900  | 0.60931500  | 2.52224700  |   |             |             |             |
| C | 5.59553800  | 1.48151300  | 0.84207400  |   |             |             |             |
| H | 6.46376300  | 2.02811300  | 0.48646000  |   |             |             |             |
| C | 4.38810500  | 1.58138000  | 0.15261600  |   |             |             |             |
| H | 4.33112300  | 2.21175800  | -0.72889000 |   |             |             |             |
| C | -1.15481700 | -1.82547600 | -2.48570700 |   |             |             |             |
| C | -1.22253900 | -0.65535600 | -3.25417300 |   |             |             |             |
| H | -1.11382900 | 0.31350400  | -2.78180400 |   |             |             |             |

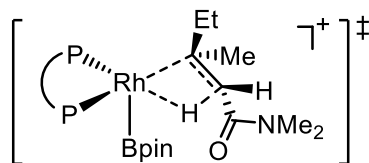

$G_{sol} = -2998.07717351$  Hartree

|    |             |            |             |
|----|-------------|------------|-------------|
| Rh | 0.66776400  | 0.67558200 | 0.14194000  |
| C  | 1.27278200  | 2.73509100 | -0.80982900 |
| C  | 2.45776900  | 2.06139900 | -0.39986800 |
| H  | 2.25106400  | 0.58433400 | 0.25280700  |
| C  | 0.73426900  | 3.82566100 | 0.11014800  |
| H  | 0.87719200  | 3.53906500 | 1.16007800  |
| H  | -0.34369300 | 3.92133100 | -0.03628000 |

|   |             |             |             |   |             |             |             |
|---|-------------|-------------|-------------|---|-------------|-------------|-------------|
| B | 0.84451900  | -0.61201000 | -1.42882600 | H | -3.94109100 | -5.49353200 | 0.61681500  |
| H | 2.88895600  | 2.40327900  | 0.54020500  | H | -5.31495800 | -4.39905600 | 0.88824800  |
| C | 3.45790300  | 1.52927400  | -1.41997500 | H | -3.89171800 | -4.32930300 | 1.95035100  |
| O | 3.21027400  | 0.50613200  | -2.06495000 | C | -4.07291900 | -3.56964100 | -1.44768000 |
| N | 4.61364600  | 2.23015300  | -1.58393900 | H | -3.84536200 | -4.56287400 | -1.84280800 |
| C | 5.61169200  | 1.74241000  | -2.53536600 | H | -3.58760200 | -2.81492200 | -2.07003500 |
| H | 6.58147100  | 1.64403100  | -2.03549700 | H | -5.15446000 | -3.41525800 | -1.49412500 |
| H | 5.71932600  | 2.44678000  | -3.36810200 | C | -2.33909600 | 2.52550500  | 0.91897700  |
| H | 5.29528200  | 0.77553400  | -2.91879500 | C | -3.12220100 | 3.47586000  | 0.24768900  |
| C | 0.51161700  | -1.45955900 | -3.54603400 | H | -3.48351600 | 3.27553000  | -0.75482100 |
| C | 1.34772100  | -2.49455900 | -2.66534100 | C | -3.45226500 | 4.68440600  | 0.86694400  |
| O | 0.38583600  | -0.28496100 | -2.66915900 | H | -4.06307400 | 5.40797600  | 0.33526900  |
| O | 1.29749900  | -1.89770100 | -1.32317000 | C | -3.00966000 | 4.95846500  | 2.16110500  |
| C | 0.73879000  | -3.89437100 | -2.56564900 | H | -3.27342500 | 5.89574800  | 2.64145700  |
| H | 1.36722500  | -4.51447600 | -1.92000800 | C | -2.22681500 | 4.01906900  | 2.83627900  |
| H | 0.70359500  | -4.37289600 | -3.54918200 | H | -1.87896400 | 4.22235200  | 3.84491700  |
| H | -0.26853300 | -3.88384300 | -2.14536800 | C | -1.88790600 | 2.81565100  | 2.21876500  |
| C | -0.91097600 | -1.92322600 | -3.86802400 | H | -1.26683300 | 2.10607900  | 2.75890100  |
| H | -0.90199600 | -2.77545300 | -4.55349300 | C | -2.90114300 | 0.84206800  | -1.37091200 |
| H | -1.45881100 | -1.10695100 | -4.34405600 | C | -2.35361300 | 1.26448800  | -2.59193200 |
| H | -1.45679100 | -2.21214600 | -2.96731200 | H | -1.29950600 | 1.49497400  | -2.65861700 |
| C | 2.82702200  | -2.60454800 | -3.04722600 | C | -3.15111500 | 1.35124100  | -3.73499700 |
| H | 2.94443100  | -3.06477200 | -4.03265100 | H | -2.71353000 | 1.68603200  | -4.67101200 |
| H | 3.33136700  | -3.24304600 | -2.31630100 | C | -4.50032800 | 1.00133600  | -3.67686500 |
| H | 3.31587500  | -1.63064900 | -3.04350200 | H | -5.12036900 | 1.06591500  | -4.56603800 |
| C | 1.21115000  | -0.99494200 | -4.82321400 | C | -5.04916700 | 0.56062700  | -2.47067400 |
| H | 0.58174700  | -0.26104500 | -5.33455700 | H | -6.09609200 | 0.27718500  | -2.41915800 |
| H | 1.37149400  | -1.83306700 | -5.50836600 | C | -4.26004200 | 0.48464500  | -1.32308100 |
| H | 2.17223800  | -0.52799600 | -4.60481300 | H | -4.70843100 | 0.12857400  | -0.40454700 |
| P | -1.85940300 | 0.91036600  | 0.14532400  | C | 0.34752100  | -0.59103200 | 3.28401400  |
| P | 0.78270700  | -1.20808100 | 1.59932600  | C | 0.99546500  | 0.57972000  | 3.72052600  |
| O | -2.15162400 | -3.61970500 | 0.05202300  | H | 1.71909100  | 1.06874100  | 3.07274000  |
| O | -3.83872200 | -2.11928200 | 0.44610200  | C | 0.74379900  | 1.10736700  | 4.98681700  |
| C | -0.28772200 | -2.69115200 | 1.24443000  | H | 1.26155400  | 2.00566500  | 5.30977700  |
| H | -0.49966900 | -3.25262400 | 2.15954200  | C | -0.16580900 | 0.47672900  | 5.83945300  |
| H | 0.34119700  | -3.32372900 | 0.61488400  | H | -0.36304500 | 0.88529500  | 6.82565000  |
| C | -1.56665700 | -2.38887900 | 0.47028900  | C | -0.81246800 | -0.68618600 | 5.42086300  |
| H | -1.31243500 | -1.78547900 | -0.41127700 | H | -1.51409300 | -1.18725900 | 6.08088100  |
| C | -2.71842500 | -1.71965200 | 1.22617700  | C | -0.55657300 | -1.21913000 | 4.15436000  |
| H | -2.79347800 | -2.16825300 | 2.23124700  | H | -1.06483900 | -2.13129300 | 3.86121300  |
| C | -2.70563500 | -0.20016900 | 1.40052100  | C | 2.43158200  | -1.98547500 | 1.89214500  |
| H | -3.73723700 | 0.14028900  | 1.52647400  | C | 3.47738200  | -1.85415700 | 0.96790700  |
| H | -2.19875100 | 0.03509500  | 2.33928500  | H | 3.33001400  | -1.28606600 | 0.05688000  |
| C | -3.58607600 | -3.45597000 | -0.01041500 | C | 4.70195900  | -2.48370100 | 1.20074500  |
| C | -4.22551200 | -4.48269200 | 0.92083500  | H | 5.50458500  | -2.37767200 | 0.47687600  |

|   |             |             |             |
|---|-------------|-------------|-------------|
| C | 4.89433900  | -3.24845600 | 2.35179600  |
| H | 5.84846800  | -3.73523000 | 2.53015800  |
| C | 3.85582100  | -3.38623400 | 3.27497700  |
| H | 3.99862900  | -3.97795600 | 4.17410100  |
| C | 2.63175500  | -2.75800300 | 3.04878000  |
| H | 1.83909800  | -2.86282000 | 3.78329900  |
| C | 0.96517100  | 2.91289500  | -2.28485200 |
| H | 1.61817900  | 3.68625500  | -2.71291600 |
| H | 1.10910100  | 1.99374800  | -2.85183200 |
| H | -0.06298100 | 3.25610300  | -2.42338400 |
| C | 1.37571700  | 5.20918000  | -0.11842700 |
| H | 1.23236400  | 5.55571800  | -1.14587300 |
| H | 0.91563200  | 5.94652300  | 0.54603600  |
| H | 2.45072500  | 5.20499400  | 0.08960900  |
| C | 4.96916600  | 3.47642700  | -0.91555700 |
| H | 5.21888200  | 4.23858200  | -1.66236500 |
| H | 4.14859900  | 3.85675800  | -0.31281400 |
| H | 5.84514200  | 3.33211400  | -0.27164100 |

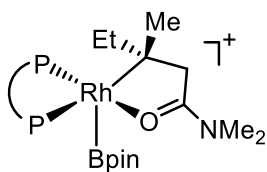

G<sub>tot</sub> = -2998.10660510 Hartree

|    |             |            |             |
|----|-------------|------------|-------------|
| Rh | 0.52844100  | 0.58623100 | 0.56140800  |
| C  | 0.57654300  | 2.56935900 | 1.40299800  |
| C  | 1.88384000  | 3.19015100 | 0.84474900  |
| H  | 1.72386300  | 3.55100800 | -0.17769200 |
| C  | -0.58360700 | 3.55146500 | 1.17893200  |
| H  | -1.51915000 | 3.07940300 | 1.49190000  |
| H  | -0.67732600 | 3.75123600 | 0.10446400  |
| B  | 0.37646300  | 1.15757800 | -1.35502600 |
| H  | 2.18431000  | 4.05065400 | 1.45320400  |
| C  | 2.97472900  | 2.15858800 | 0.77149200  |
| O  | 2.62538100  | 0.94550400 | 0.65540400  |
| N  | 4.27636900  | 2.47740500 | 0.81672200  |
| C  | 5.30458700  | 1.43342700 | 0.79878900  |
| H  | 5.91646700  | 1.50519400 | 1.70434900  |
| H  | 5.95265000  | 1.56654200 | -0.07315600 |
| H  | 4.83161000  | 0.45659100 | 0.74830100  |
| C  | -0.16925300 | 1.18105300 | -3.59760000 |
| C  | 0.91866100  | 2.28208700 | -3.29643100 |
| O  | -0.61152400 | 0.81442400 | -2.24729700 |
| O  | 1.36876600  | 1.91496500 | -1.94810000 |

|   |             |             |             |
|---|-------------|-------------|-------------|
| C | 2.12829500  | 2.26996800  | -4.22762300 |
| H | 2.83946500  | 3.04148100  | -3.91926900 |
| H | 1.82520800  | 2.48708600  | -5.25679300 |
| H | 2.64337800  | 1.30805100  | -4.21607100 |
| C | 0.39627100  | -0.09018000 | -4.24193600 |
| H | 0.67406900  | 0.08307800  | -5.28548300 |
| H | -0.36643600 | -0.87333600 | -4.21738700 |
| H | 1.27930900  | -0.45551100 | -3.71066700 |
| C | 0.34596600  | 3.70110800  | -3.20247000 |
| H | 0.03060600  | 4.07133200  | -4.18179900 |
| H | 1.11748200  | 4.37535100  | -2.82010700 |
| H | -0.51175800 | 3.74814600  | -2.52564200 |
| C | -1.38322600 | 1.66512700  | -4.38674100 |
| H | -2.08715600 | 0.83958900  | -4.52132800 |
| H | -1.08337500 | 2.01368900  | -5.38031900 |
| H | -1.90809300 | 2.47428800  | -3.87726100 |
| P | -1.77869200 | 0.07123500  | 0.89865700  |
| P | 1.22825200  | -1.80757400 | -0.06211700 |
| O | -1.82403000 | -2.98056800 | -2.53834900 |
| O | -3.42845700 | -2.52964500 | -0.95691800 |
| C | 0.23370900  | -2.77743200 | -1.31345300 |
| H | 0.28932100  | -3.85557500 | -1.13268900 |
| H | 0.73610300  | -2.59960300 | -2.26874600 |
| C | -1.20697700 | -2.30412200 | -1.44217600 |
| H | -1.21507300 | -1.22448000 | -1.62374300 |
| C | -2.16916500 | -2.63418800 | -0.30421100 |
| H | -2.00442900 | -3.67855900 | 0.01418900  |
| C | -2.14013700 | -1.77180800 | 0.95576600  |
| H | -3.09153300 | -1.90035500 | 1.47931300  |
| H | -1.37823400 | -2.17278600 | 1.62804500  |
| C | -3.24697600 | -2.92955100 | -2.33136300 |
| C | -3.80879800 | -4.32772000 | -2.55904100 |
| H | -3.58789700 | -4.66210500 | -3.57638400 |
| H | -4.89253400 | -4.32950500 | -2.41610900 |
| H | -3.35849900 | -5.03441100 | -1.85733900 |
| C | -3.88480700 | -1.86754800 | -3.21962500 |
| H | -3.77764200 | -2.14340000 | -4.27228500 |
| H | -3.40542600 | -0.90039700 | -3.04928500 |
| H | -4.94928700 | -1.77050500 | -2.98960200 |
| C | -2.15689000 | 0.41470000  | 2.67993800  |
| C | -3.09986200 | 1.37652200  | 3.07164500  |
| H | -3.65272100 | 1.93495000  | 2.32432100  |
| C | -3.34770300 | 1.61474200  | 4.42563300  |
| H | -4.08291200 | 2.36099200  | 4.71147400  |
| C | -2.66363900 | 0.89407700  | 5.40479300  |

|   |             |             |             |
|---|-------------|-------------|-------------|
| H | -2.86306100 | 1.07662500  | 6.45629400  |
| C | -1.72352400 | -0.06665300 | 5.02525400  |
| H | -1.18752200 | -0.63407700 | 5.78024800  |
| C | -1.46700400 | -0.30140500 | 3.67483500  |
| H | -0.71820700 | -1.04162900 | 3.40632200  |
| C | -3.20844700 | 0.81332600  | 0.00258300  |
| C | -3.06295500 | 1.98453200  | -0.75229300 |
| H | -2.08444500 | 2.42494900  | -0.87263700 |
| C | -4.16791000 | 2.58322700  | -1.36022000 |
| H | -4.03670200 | 3.49330200  | -1.93821100 |
| C | -5.43471900 | 2.01627900  | -1.22477500 |
| H | -6.29478300 | 2.48089900  | -1.69761100 |
| C | -5.59204500 | 0.84714400  | -0.47749600 |
| H | -6.57379000 | 0.39664400  | -0.36776900 |
| C | -4.49036200 | 0.24931200  | 0.13190500  |
| H | -4.64139600 | -0.66024000 | 0.69951100  |
| C | 1.28496700  | -2.80468100 | 1.49031100  |
| C | 1.94788400  | -2.21821200 | 2.58567100  |
| H | 2.40768200  | -1.23909000 | 2.47428200  |
| C | 2.04215400  | -2.88959100 | 3.80412900  |
| H | 2.56592100  | -2.42715700 | 4.63561600  |
| C | 1.46535400  | -4.15386200 | 3.95431800  |
| H | 1.53491000  | -4.67606400 | 4.90357800  |
| C | 0.80350700  | -4.74367800 | 2.87765300  |
| H | 0.35742600  | -5.72787000 | 2.98487000  |
| C | 0.71603200  | -4.07659000 | 1.65201300  |
| H | 0.20405600  | -4.56317600 | 0.82875300  |
| C | 2.93110300  | -2.02433700 | -0.74444700 |
| C | 3.45237700  | -1.05236500 | -1.61301800 |
| H | 2.89637200  | -0.14075000 | -1.80151400 |
| C | 4.69804100  | -1.24083700 | -2.21502600 |
| H | 5.09022100  | -0.48394600 | -2.88853300 |
| C | 5.44150700  | -2.39186700 | -1.94760000 |
| H | 6.41123200  | -2.53596900 | -2.41463800 |
| C | 4.93537500  | -3.35617700 | -1.07429200 |
| H | 5.50967800  | -4.25238900 | -0.85926500 |
| C | 3.68727800  | -3.17592300 | -0.47606600 |
| H | 3.30641300  | -3.93443200 | 0.20010600  |
| C | 0.76823900  | 2.25582000  | 2.89894000  |
| H | 1.44514300  | 1.40870900  | 3.07237700  |
| H | 1.21394300  | 3.11265900  | 3.42547700  |
| H | -0.17691400 | 2.02911900  | 3.39199400  |
| C | -0.47969800 | 4.90610400  | 1.90992700  |
| H | 0.40217400  | 5.48064400  | 1.60768700  |
| H | -1.35644100 | 5.52046500  | 1.68171300  |

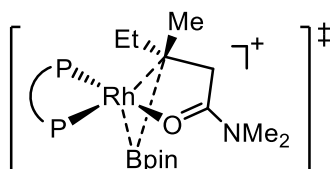

$G_{sol} = -2998.08954067$  Hartree

|    |             |             |             |
|----|-------------|-------------|-------------|
| Rh | -0.18399400 | -0.32451800 | -0.56888700 |
| C  | -2.03465900 | -0.86150300 | -2.03108800 |
| B  | -2.21263200 | -0.74969800 | -0.09002700 |
| H  | -2.79202100 | -2.88732600 | -1.75406300 |
| C  | -3.50114000 | -0.38392700 | -2.28769800 |
| H  | -3.59646700 | 0.65484200  | -1.96216700 |
| H  | -4.16945300 | -0.96734800 | -1.65027000 |
| C  | -1.96005000 | -2.39223700 | -2.26315300 |
| H  | -2.07316700 | -2.59377800 | -3.33506400 |
| C  | -0.68341700 | -3.04038100 | -1.77452100 |
| O  | 0.13555900  | -2.40115900 | -1.05937100 |
| N  | -0.41130100 | -4.31516200 | -2.11003600 |
| C  | 0.84643700  | -4.94120300 | -1.69681000 |
| H  | 1.23557700  | -5.53672200 | -2.52755000 |
| H  | 0.68532000  | -5.60398600 | -0.83874100 |
| H  | 1.57038200  | -4.17425800 | -1.43152900 |
| C  | -3.39449700 | -1.87517400 | 1.56437900  |
| C  | -3.94011200 | -0.39209700 | 1.43727800  |
| O  | -2.54090900 | -2.01084500 | 0.39252000  |
| O  | -2.97330000 | 0.22924100  | 0.53319800  |
| C  | -5.33152900 | -0.27905300 | 0.79775100  |
| H  | -5.52546900 | 0.76887600  | 0.55383500  |
| H  | -6.10709700 | -0.61651700 | 1.49160600  |
| H  | -5.42677100 | -0.85866100 | -0.12057700 |
| C  | -4.46631600 | -2.96434500 | 1.49661300  |
| H  | -5.16278000 | -2.88134200 | 2.33693200  |
| H  | -3.99124300 | -3.94783900 | 1.55336000  |
| H  | -5.03970100 | -2.91880400 | 0.56901100  |
| C  | -3.95556300 | 0.39507600  | 2.74950600  |
| H  | -4.63665800 | -0.07093500 | 3.46854800  |
| H  | -4.31560700 | 1.41126100  | 2.56485400  |
| H  | -2.96796900 | 0.46555500  | 3.20344700  |
| C  | -2.51319800 | -2.10818000 | 2.79657000  |



|   |             |             |             |   |             |             |             |
|---|-------------|-------------|-------------|---|-------------|-------------|-------------|
| H | -2.06774400 | -3.10348600 | 2.73333300  | H | 6.10018700  | -2.93758000 | 0.50745400  |
| H | -3.09454100 | -2.05221900 | 3.72135900  | C | 4.21071800  | -1.91564900 | 0.59437700  |
| H | -1.69489300 | -1.38727700 | 2.85255600  | H | 4.23505400  | -1.83312300 | 1.67688400  |
| P | 1.76729200  | -0.50822600 | 0.75308800  | C | -0.40916800 | 2.65911700  | 1.43327400  |
| P | -0.36693800 | 1.98430400  | -0.28693300 | C | -0.56815200 | 1.79765000  | 2.52638500  |
| O | 3.40928300  | 2.86788800  | -1.67044200 | H | -0.67391700 | 0.73302900  | 2.34901200  |
| O | 4.44425300  | 1.87116700  | 0.11689000  | C | -0.58859600 | 2.29831900  | 3.83094500  |
| C | 1.09657000  | 2.85359100  | -1.06689900 | H | -0.70864400 | 1.61614100  | 4.66752900  |
| H | 1.16670200  | 3.87417800  | -0.67954200 | C | -0.45775800 | 3.66890100  | 4.05628400  |
| H | 0.89144600  | 2.93633600  | -2.13649900 | H | -0.47305200 | 4.05947600  | 5.06928200  |
| C | 2.43484000  | 2.14289900  | -0.92961600 | C | -0.31402400 | 4.53933600  | 2.97255600  |
| H | 2.34232800  | 1.12512000  | -1.33478600 | H | -0.22137200 | 5.60808300  | 3.14010900  |
| C | 3.07895000  | 2.07734200  | 0.45894500  | C | -0.29307700 | 4.03981200  | 1.67081900  |
| H | 2.95669500  | 3.05690000  | 0.95037200  | H | -0.20291500 | 4.73545100  | 0.84185200  |
| C | 2.62374300  | 0.99388900  | 1.44448300  | C | -1.77270900 | 2.90058400  | -1.07926500 |
| H | 3.50395500  | 0.66145700  | 2.00273900  | C | -2.92921500 | 3.17185100  | -0.32883100 |
| H | 1.92806600  | 1.43874100  | 2.15703600  | H | -2.99164100 | 2.84216300  | 0.70002000  |
| C | 4.70408700  | 2.62743500  | -1.07559100 | C | -4.00045600 | 3.86161100  | -0.89536200 |
| C | 5.32994600  | 3.97788200  | -0.73934700 | H | -4.88130800 | 4.06887300  | -0.29484200 |
| H | 5.43187000  | 4.58171300  | -1.64509600 | C | -3.94129200 | 4.29065100  | -2.22263000 |
| H | 6.31988500  | 3.83668100  | -0.29775200 | H | -4.77464000 | 4.83148300  | -2.66066900 |
| H | 4.70309100  | 4.52563100  | -0.03096000 | C | -2.80017900 | 4.02713900  | -2.97966000 |
| C | 5.56685500  | 1.77961700  | -1.99959700 | H | -2.73693800 | 4.36345500  | -4.01011400 |
| H | 5.76865600  | 2.32190200  | -2.92699800 | C | -1.72518400 | 3.33852800  | -2.41372600 |
| H | 5.05759300  | 0.84260800  | -2.23538400 | H | -0.85113100 | 3.16281600  | -3.03120000 |
| H | 6.51960900  | 1.54646800  | -1.51625000 | C | -1.14205800 | -0.18105600 | -3.11180400 |
| C | 1.50037500  | -1.54660300 | 2.25306100  | H | -0.07271600 | -0.40623400 | -3.02817100 |
| C | 1.10233600  | -2.88242200 | 2.06736400  | H | -1.45066000 | -0.54449100 | -4.10060700 |
| H | 0.92842900  | -3.25236900 | 1.06326100  | H | -1.26607300 | 0.90160500  | -3.11933900 |
| C | 0.92227200  | -3.72469200 | 3.16239800  | C | -4.02346700 | -0.49866200 | -3.73240300 |
| H | 0.62529000  | -4.75736100 | 3.00357800  | H | -3.93132000 | -1.51045300 | -4.14198700 |
| C | 1.12104400  | -3.24640100 | 4.46031500  | H | -5.08827300 | -0.24555500 | -3.74299100 |
| H | 0.98181700  | -3.90477200 | 5.31240600  | H | -3.52329900 | 0.19005200  | -4.41756300 |
| C | 1.50061000  | -1.91914300 | 4.65545000  | C | -1.32080500 | -5.18365300 | -2.85570800 |
| H | 1.65996000  | -1.53884700 | 5.66006300  | H | -2.31686400 | -4.75354900 | -2.92451700 |
| C | 1.69228200  | -1.07215400 | 3.56023500  | H | -0.93945200 | -5.36741900 | -3.86682500 |
| H | 2.00116800  | -0.04960600 | 3.74373900  | H | -1.40171900 | -6.14479300 | -2.33851300 |
| C | 3.12400600  | -1.40022300 | -0.13015600 |   |             |             |             |
| C | 3.11138100  | -1.53807900 | -1.52502300 |   |             |             |             |
| H | 2.27000200  | -1.15984200 | -2.09599900 |   |             |             |             |
| C | 4.16863400  | -2.16914000 | -2.18494100 |   |             |             |             |
| H | 4.14748100  | -2.26673000 | -3.26650700 |   |             |             |             |
| C | 5.24729000  | -2.67256500 | -1.45609500 |   |             |             |             |
| H | 6.06962900  | -3.16287700 | -1.96838700 |   |             |             |             |
| C | 5.26506700  | -2.54574900 | -0.06524500 |   |             |             |             |

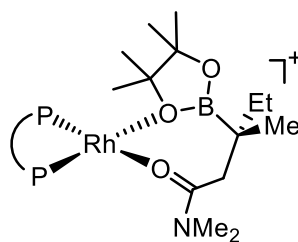

$G_{sol} = -2998.12908358$  Hatree

|    |             |             |             |   |             |             |             |
|----|-------------|-------------|-------------|---|-------------|-------------|-------------|
| Rh | -0.35926600 | 0.06533000  | 0.12014900  | C | 3.57517700  | 0.89334800  | -0.91740300 |
| C  | -2.96604100 | -1.60539200 | -1.80802700 | H | 4.01838100  | 1.89841000  | -0.81786600 |
| B  | -3.31535500 | -0.74884500 | -0.51536100 | C | 3.24876900  | 0.38318400  | 0.49082000  |
| H  | -3.44480300 | -3.58258800 | -1.05735800 | H | 4.11017300  | -0.20491600 | 0.81908700  |
| C  | -4.29558000 | -1.72674000 | -2.62656800 | H | 3.15031300  | 1.23103500  | 1.17258000  |
| H  | -4.61117600 | -0.71338800 | -2.90929300 | C | 4.45899000  | 0.29489400  | -2.95780700 |
| H  | -5.08008500 | -2.11031400 | -1.96460600 | C | 5.60643200  | 1.21389900  | -3.36425400 |
| C  | -2.54454300 | -3.02447100 | -1.34324700 | H | 5.50687700  | 1.49853800  | -4.41520700 |
| H  | -2.09820500 | -3.57281400 | -2.18142500 | H | 6.56517400  | 0.70711600  | -3.22648400 |
| C  | -1.59530900 | -3.08219500 | -0.14736300 | H | 5.59866900  | 2.12430900  | -2.75941300 |
| O  | -1.20710400 | -2.03927300 | 0.43800400  | C | 4.45767000  | -1.03212300 | -3.70454600 |
| N  | -1.23691700 | -4.29872900 | 0.31485700  | H | 4.40226200  | -0.85752300 | -4.78219900 |
| C  | -0.37001400 | -4.44018900 | 1.48462100  | H | 3.60209800  | -1.63644200 | -3.39441100 |
| H  | 0.58246400  | -4.89418200 | 1.19358000  | H | 5.37317600  | -1.58900500 | -3.48634600 |
| H  | -0.85943000 | -5.08660900 | 2.22090200  | C | 1.75408000  | -0.88051300 | 2.58897800  |
| H  | -0.18308800 | -3.46596600 | 1.92427700  | C | 0.54959000  | -1.16724500 | 3.25554400  |
| C  | -4.41903300 | -0.20466900 | 1.42749400  | H | -0.37041700 | -1.23297500 | 2.68482200  |
| C  | -3.58876000 | 1.03792600  | 0.93248400  | C | 0.52413800  | -1.35885500 | 4.63737300  |
| O  | -4.38619300 | -1.07908800 | 0.26241600  | H | -0.41677900 | -1.58055100 | 5.13265000  |
| O  | -2.68120500 | 0.41735600  | -0.07785900 | C | 1.70109600  | -1.25901000 | 5.38176400  |
| C  | -4.43438700 | 2.05981500  | 0.16909200  | H | 1.68195300  | -1.40374900 | 6.45767600  |
| H  | -3.78181100 | 2.79679200  | -0.30011800 | C | 2.90185800  | -0.96617600 | 4.73508600  |
| H  | -5.11425300 | 2.58449600  | 0.84591900  | H | 3.82200300  | -0.88076800 | 5.30540100  |
| H  | -5.03123300 | 1.58085000  | -0.61194000 | C | 2.93019900  | -0.77775800 | 3.35132100  |
| C  | -5.87956700 | 0.09485500  | 1.75996700  | H | 3.87950200  | -0.54498500 | 2.88261600  |
| H  | -5.95159800 | 0.80948900  | 2.58597300  | C | 2.19374600  | -2.29355700 | 0.05850300  |
| H  | -6.37827200 | -0.82743600 | 2.06949200  | C | 1.66617400  | -2.71867400 | -1.16924000 |
| H  | -6.41915900 | 0.49686700  | 0.90135900  | H | 0.94478500  | -2.09426900 | -1.68672000 |
| C  | -2.76528000 | 1.71924100  | 2.01543500  | C | 2.05825500  | -3.93677800 | -1.72896000 |
| H  | -3.42454000 | 2.06671100  | 2.81786900  | H | 1.64750200  | -4.24796100 | -2.68532000 |
| H  | -2.25059100 | 2.59062100  | 1.60634000  | C | 2.97976500  | -4.74849300 | -1.06449900 |
| H  | -2.02109300 | 1.04406700  | 2.44144600  | H | 3.28844300  | -5.69420000 | -1.49997500 |
| C  | -3.76324600 | -0.97242200 | 2.58159400  | C | 3.50745600  | -4.33589800 | 0.16141300  |
| H  | -4.31420700 | -1.90344100 | 2.74120100  | H | 4.22518200  | -4.96124400 | 0.68402800  |
| H  | -3.79133800 | -0.39858300 | 3.51204700  | C | 3.11716800  | -3.11826200 | 0.71999700  |
| H  | -2.72724000 | -1.22723500 | 2.34820900  | H | 3.52912200  | -2.82111200 | 1.67900600  |
| P  | 1.71090300  | -0.64515500 | 0.75038200  | C | 1.20709500  | 3.15109100  | 0.84394100  |
| P  | 0.35895900  | 2.13818200  | -0.44725500 | C | 1.04846300  | 2.79934800  | 2.19348800  |
| O  | 3.21892100  | 1.00211000  | -3.17699200 | H | 0.46258700  | 1.92172400  | 2.44793200  |
| O  | 4.50088800  | 0.01549500  | -1.54800100 | C | 1.64721900  | 3.55791900  | 3.20196900  |
| C  | 1.52065500  | 2.14184200  | -1.91657000 | H | 1.51777100  | 3.26994700  | 4.24090100  |
| H  | 2.08175200  | 3.07995000  | -1.95452700 | C | 2.41224800  | 4.67773300  | 2.87384300  |
| H  | 0.89025200  | 2.11705600  | -2.80920900 | H | 2.88179900  | 5.26614300  | 3.65633400  |
| C  | 2.46689000  | 0.95409600  | -1.96994400 | C | 2.56993500  | 5.04312500  | 1.53444300  |
| H  | 1.87595100  | 0.02838200  | -1.93014100 | H | 3.15847300  | 5.91751600  | 1.27353300  |

|   |             |             |             |
|---|-------------|-------------|-------------|
| C | 1.96879600  | 4.28943700  | 0.52641200  |
| H | 2.08526100  | 4.60688200  | -0.50489900 |
| C | -0.95706600 | 3.27641300  | -1.07775700 |
| C | -1.32203800 | 4.44431900  | -0.39104100 |
| H | -0.83789600 | 4.70238300  | 0.54426100  |
| C | -2.29632600 | 5.29881300  | -0.91374400 |
| H | -2.56045100 | 6.20323900  | -0.37388300 |
| C | -2.91758600 | 4.99967600  | -2.12636000 |
| H | -3.66718100 | 5.66983700  | -2.53596000 |
| C | -2.56858600 | 3.83364100  | -2.81268400 |
| H | -3.04764800 | 3.59249500  | -3.75693600 |
| C | -1.60181200 | 2.97615100  | -2.28959100 |
| H | -1.34955400 | 2.07125200  | -2.83306700 |
| C | -1.87398200 | -0.96722300 | -2.68877600 |
| H | -0.97177600 | -0.71895000 | -2.11273600 |
| H | -1.57831300 | -1.63222700 | -3.50835100 |
| H | -2.23847000 | -0.03789500 | -3.13843200 |
| C | -4.24493400 | -2.58828700 | -3.89626700 |
| H | -4.00457400 | -3.63463900 | -3.67936400 |
| H | -5.22163200 | -2.58093500 | -4.38967000 |
| H | -3.51276400 | -2.21969500 | -4.62082600 |
| C | -1.61790200 | -5.57197000 | -0.29399800 |
| H | -2.32971700 | -5.44067700 | -1.10350100 |
| H | -0.72768700 | -6.07666800 | -0.68650000 |
| H | -2.07240300 | -6.21809000 | 0.464277    |

## Copies of NMR Spectra

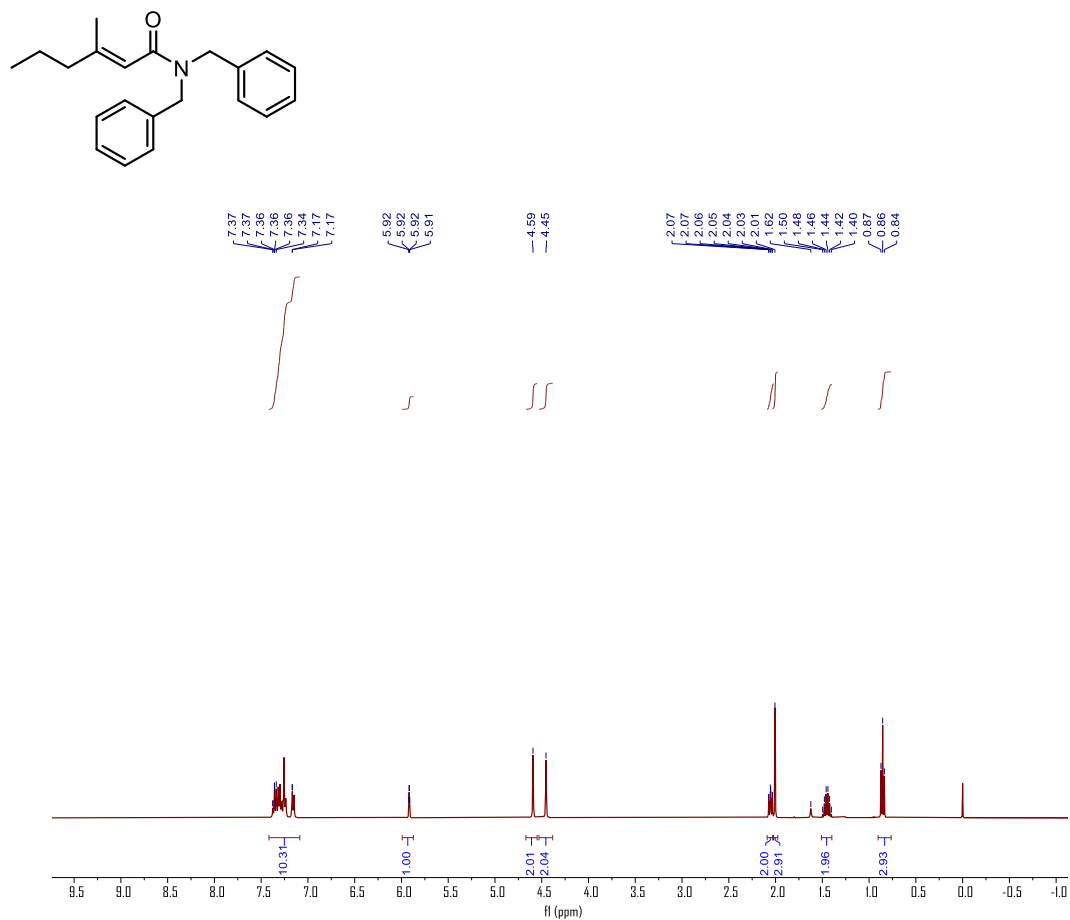

Supplementary Figure 6. <sup>1</sup>H NMR (400 MHz, CDCl<sub>3</sub>) of **1a**.

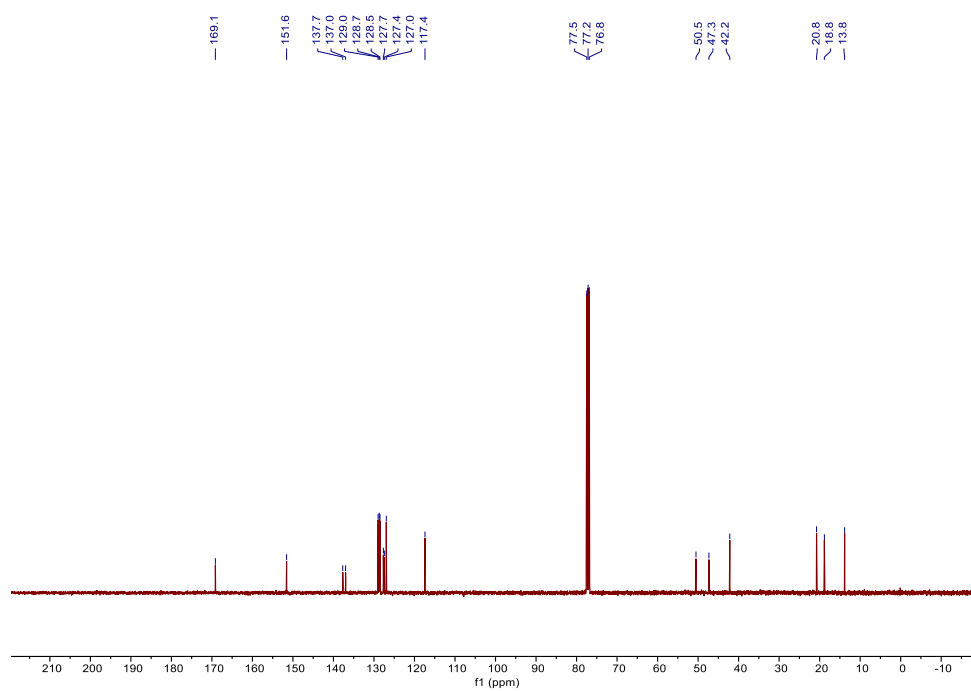

Supplementary Figure 7. <sup>13</sup>C NMR (101 MHz, CDCl<sub>3</sub>) of **1a**.

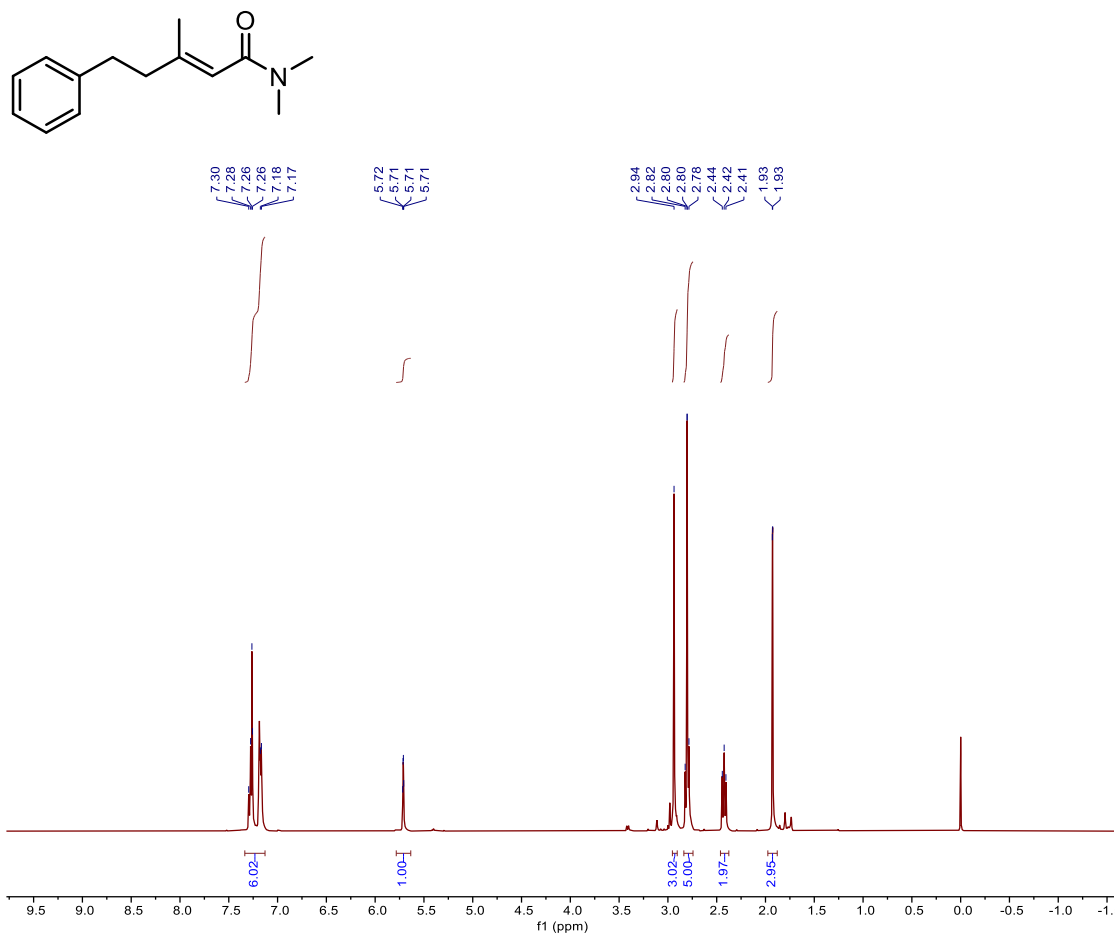

Supplementary Figure 8. <sup>1</sup>H NMR (400 MHz, CDCl<sub>3</sub>) of **1b**.

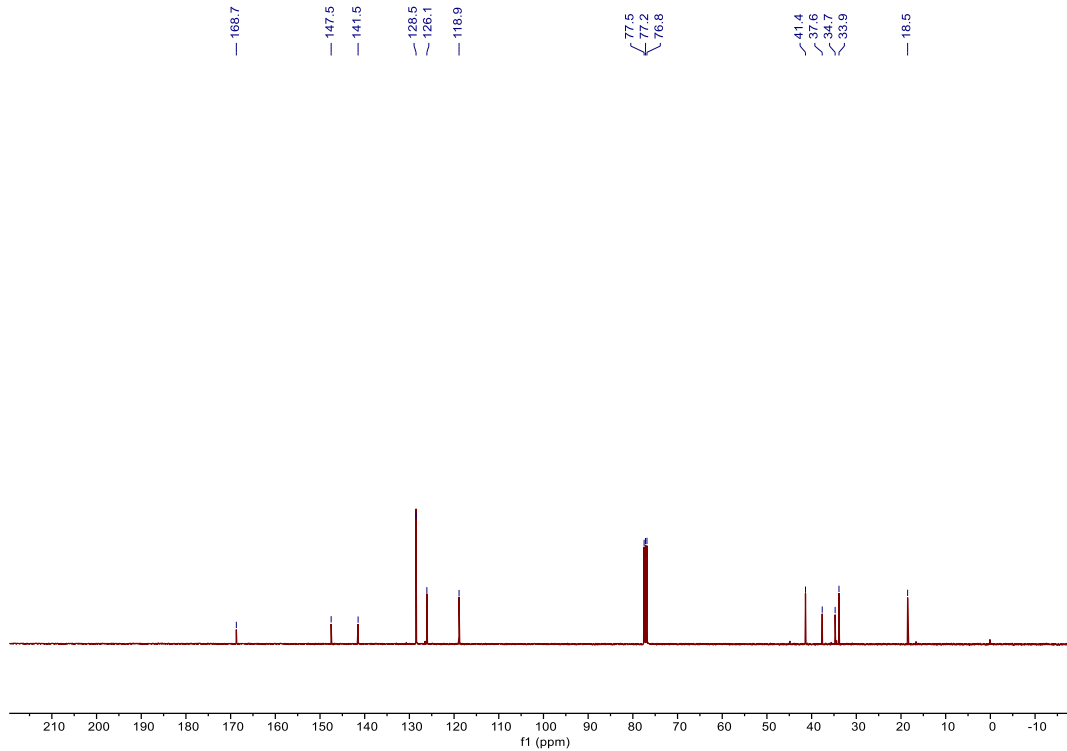

Supplementary Figure 9. <sup>13</sup>C NMR (101 MHz, CDCl<sub>3</sub>) of **1b**.

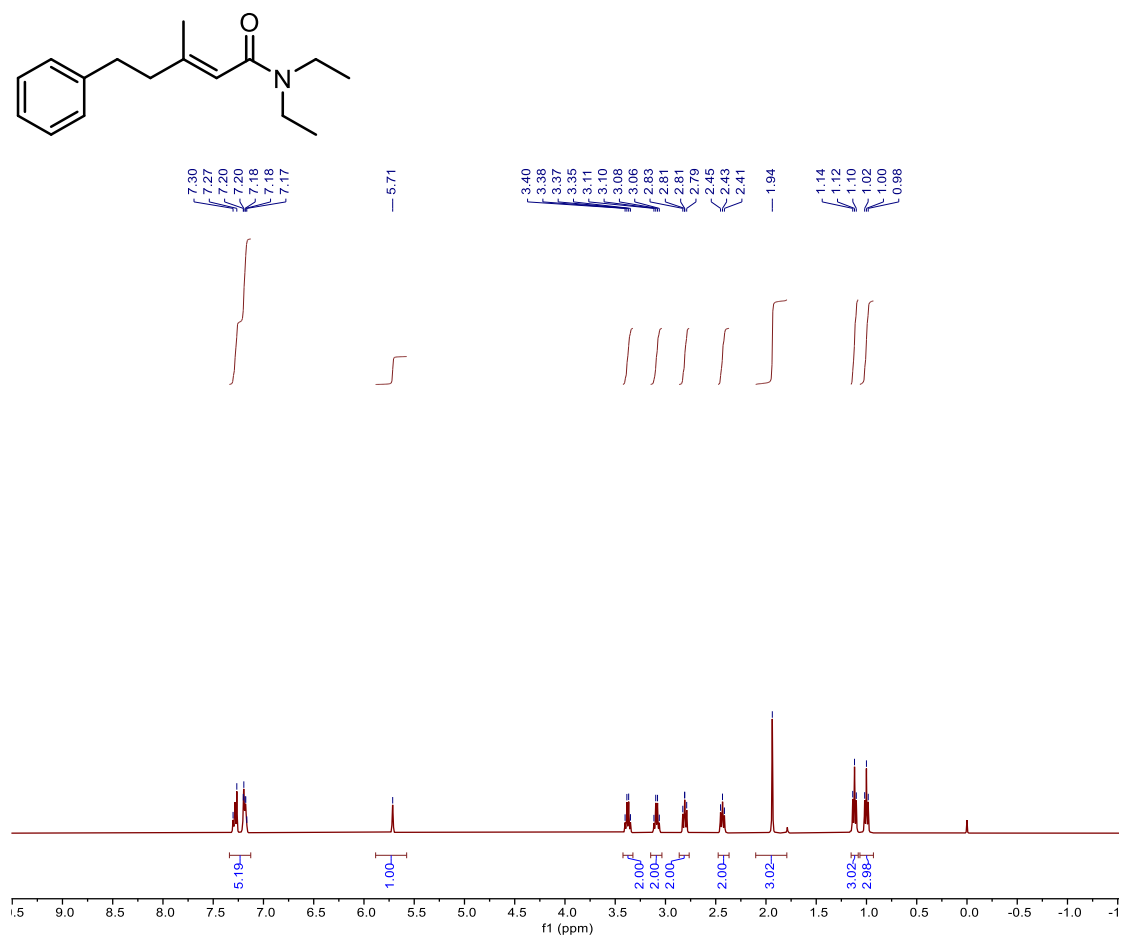

Supplementary Figure 10. <sup>1</sup>H NMR (400 MHz, CDCl<sub>3</sub>) of **1c**.

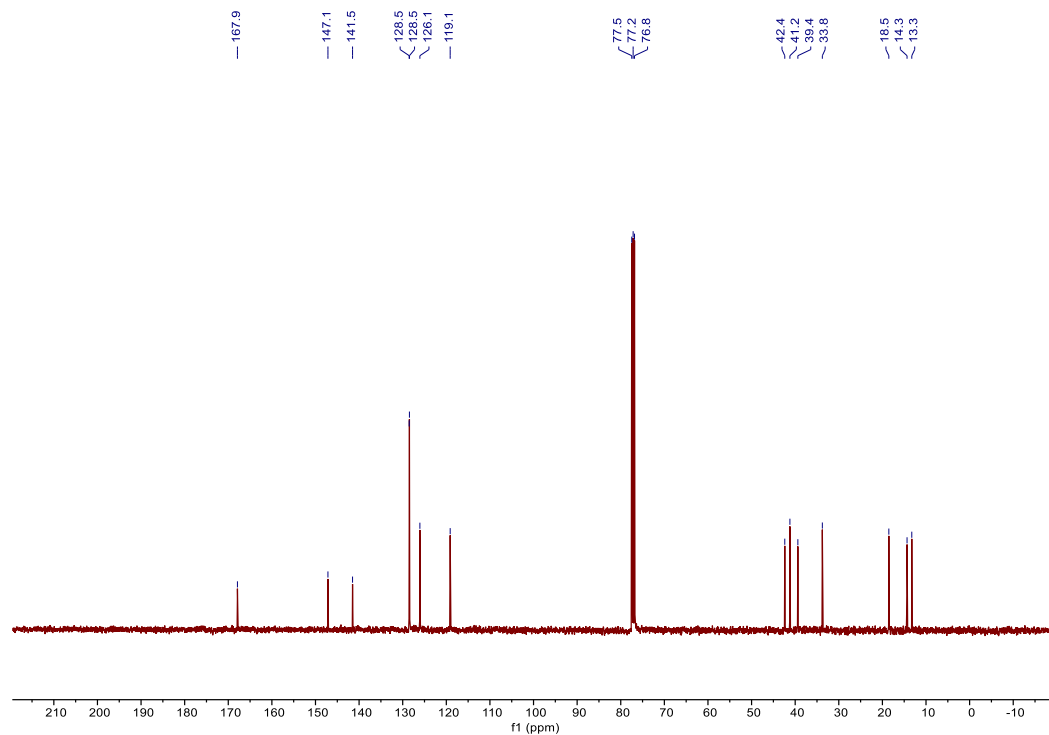

Supplementary Figure 11. <sup>13</sup>C NMR (101 MHz, CDCl<sub>3</sub>) of **1c**.

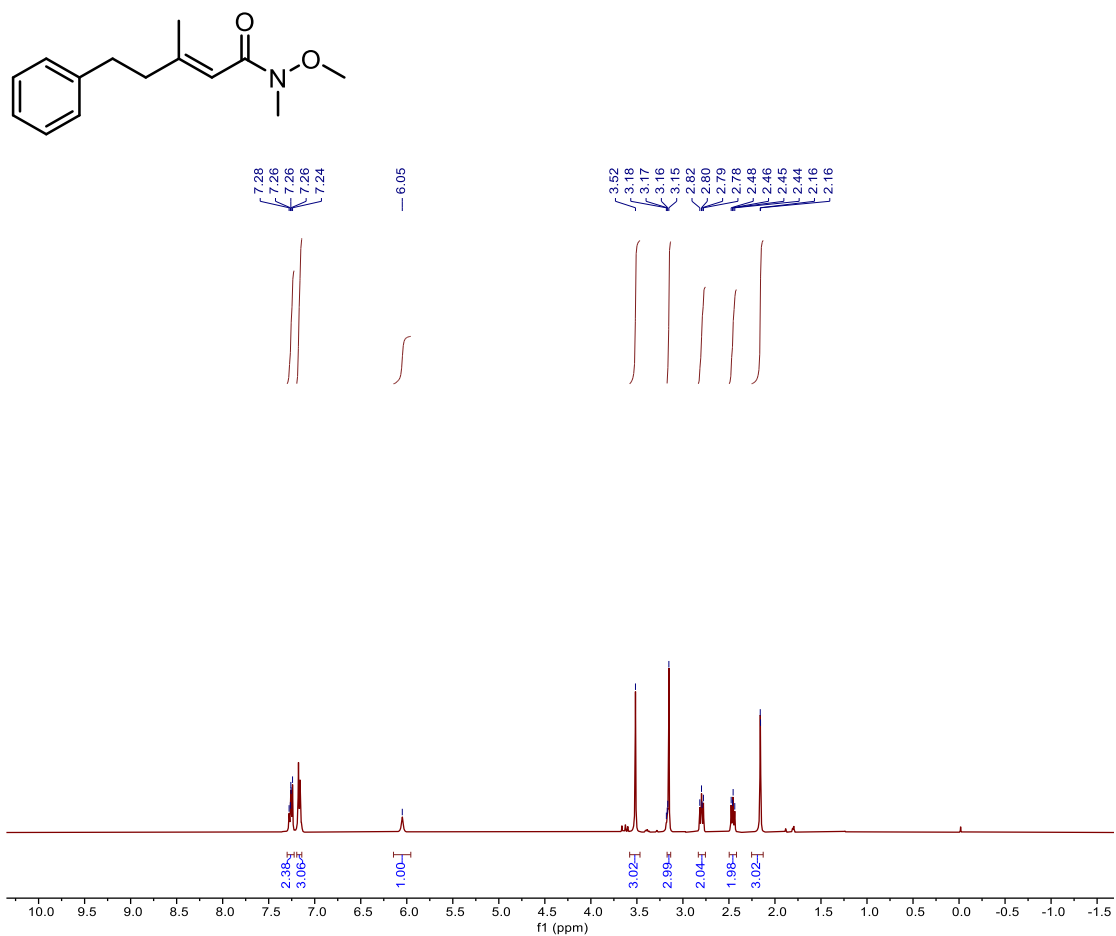

Supplementary Figure 12. <sup>1</sup>H NMR (400 MHz, CDCl<sub>3</sub>) of **1d**.

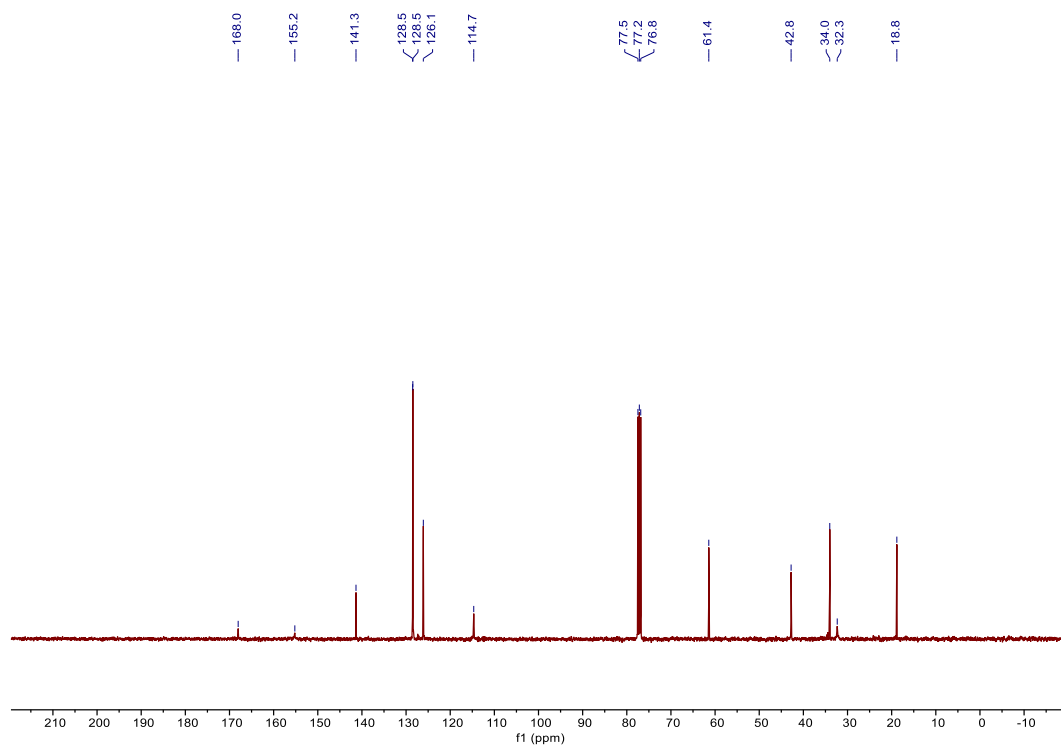

Supplementary Figure 13. <sup>13</sup>C NMR (101 MHz, CDCl<sub>3</sub>) of **1d**.

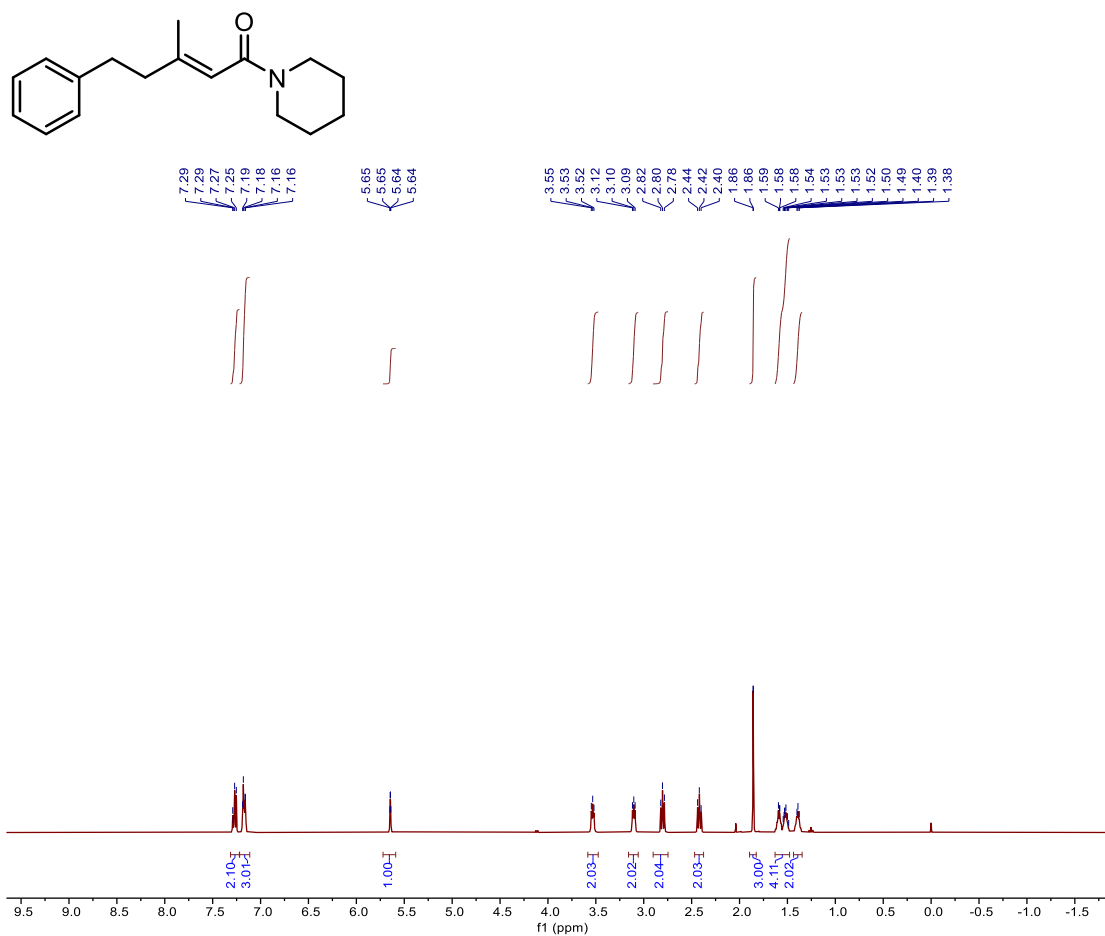

Supplementary Figure 14. <sup>1</sup>H NMR (400 MHz, CDCl<sub>3</sub>) of **1e**.

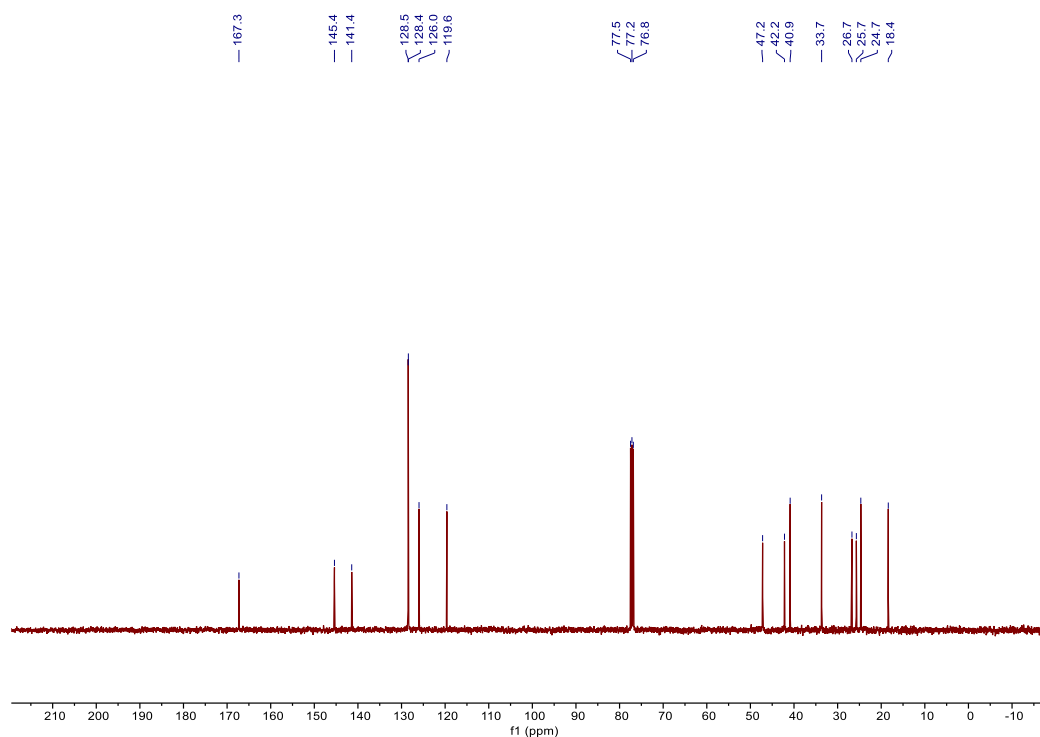

Supplementary Figure 15. <sup>13</sup>C NMR (101 MHz, CDCl<sub>3</sub>) of **1e**.



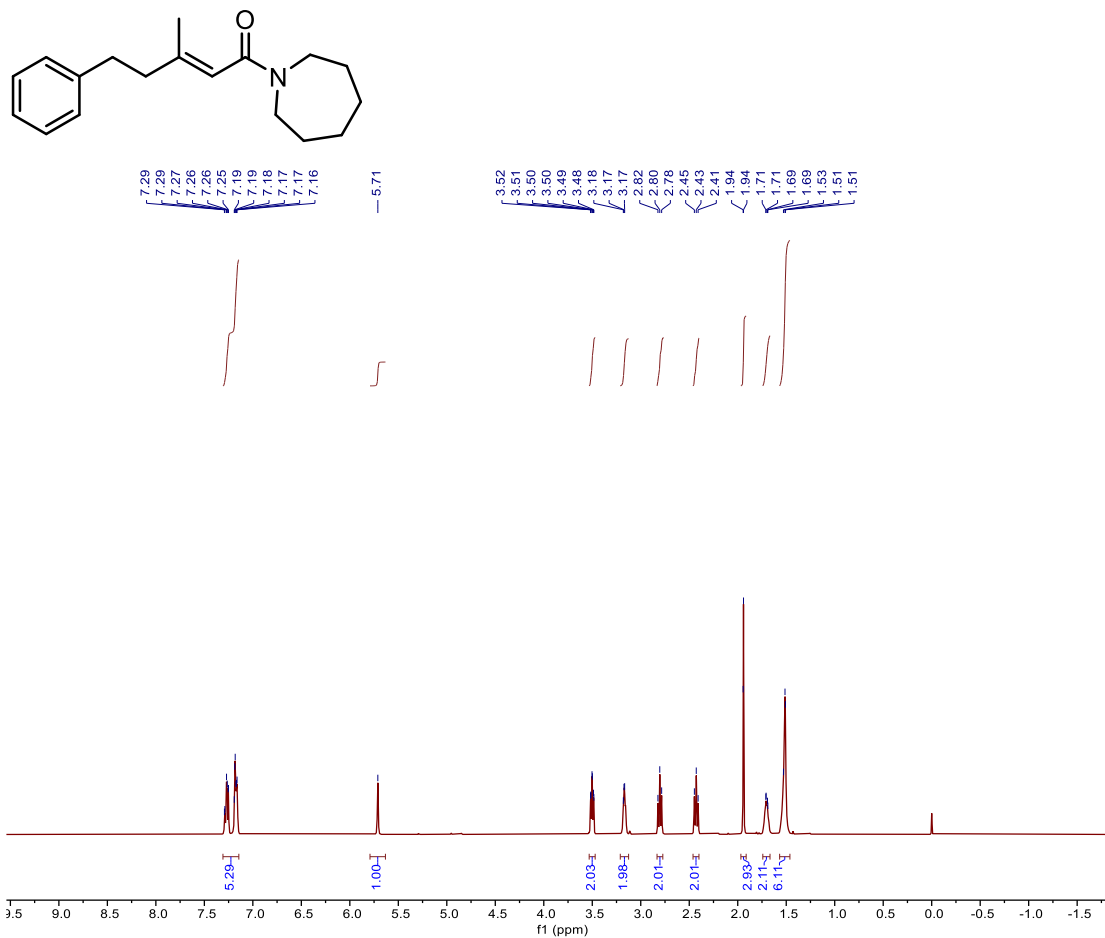

Supplementary Figure 16. <sup>1</sup>H NMR (400 MHz, CDCl<sub>3</sub>) of **1f**.

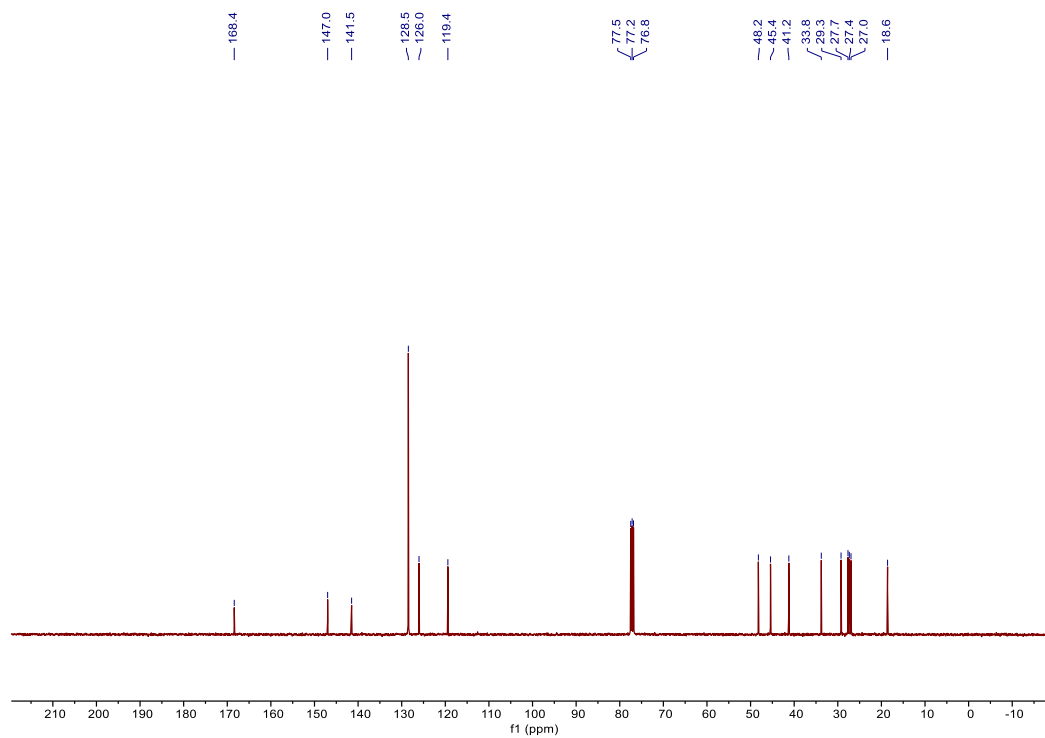

Supplementary Figure 17. <sup>13</sup>C NMR (101 MHz, CDCl<sub>3</sub>) of **1f**.

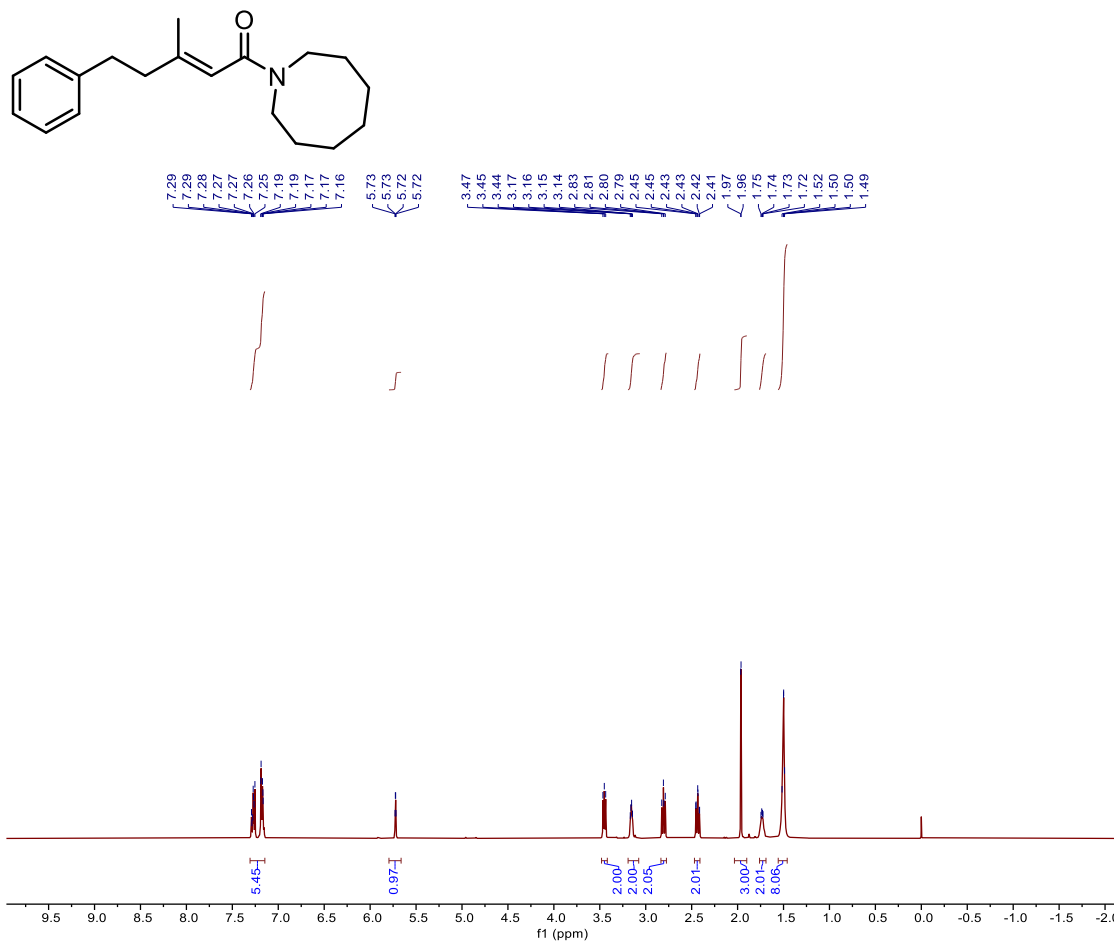

Supplementary Figure 18. <sup>1</sup>H NMR (400 MHz, CDCl<sub>3</sub>) of **1g**.

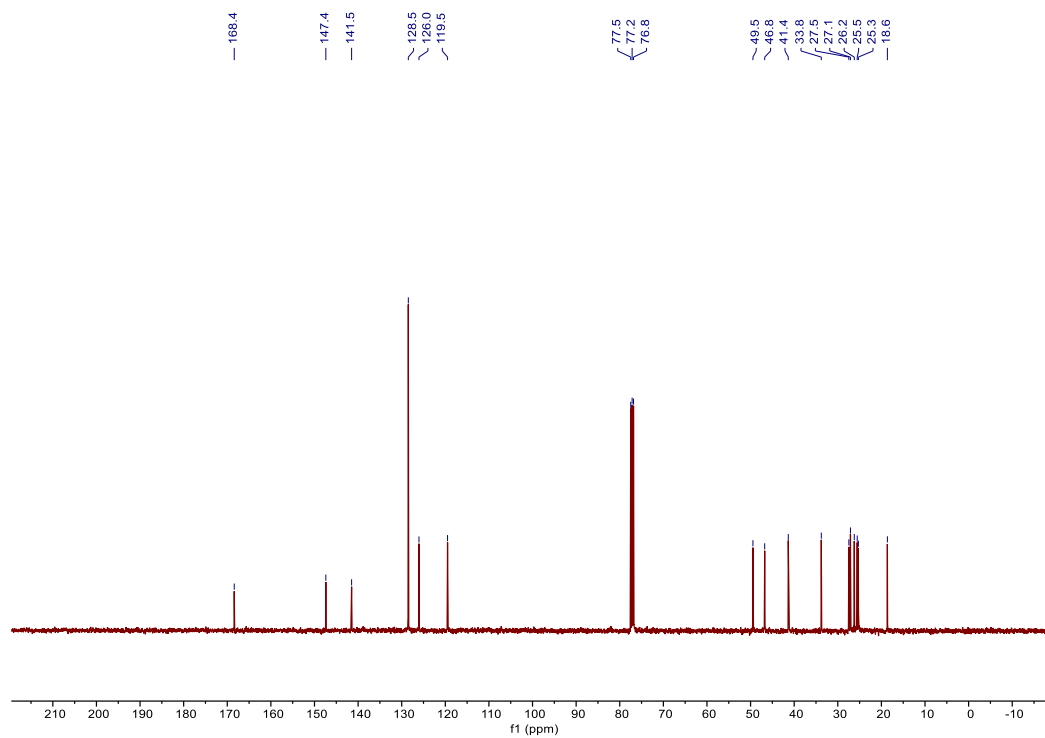

Supplementary Figure 19. <sup>13</sup>C NMR (101 MHz, CDCl<sub>3</sub>) of **1g**.

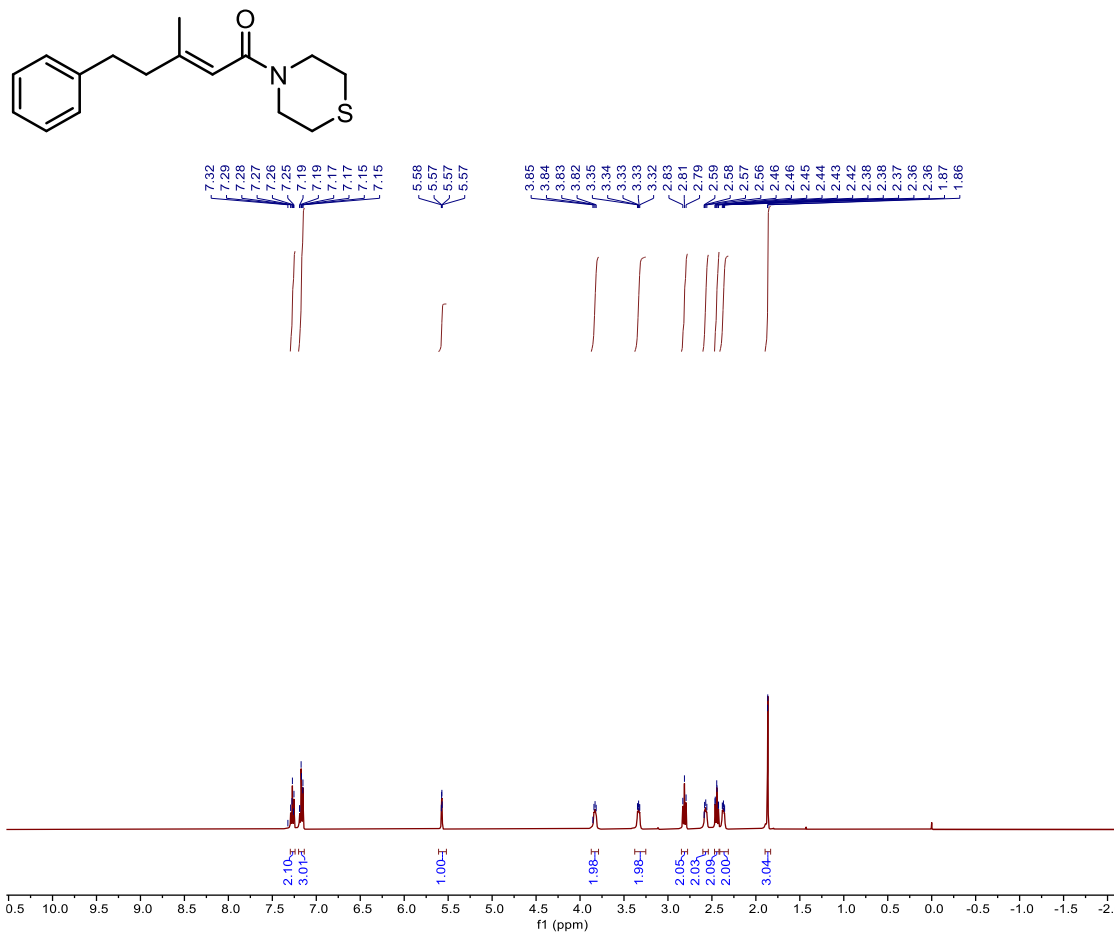

Supplementary Figure 20. <sup>1</sup>H NMR (400 MHz, CDCl<sub>3</sub>) of **1h**.

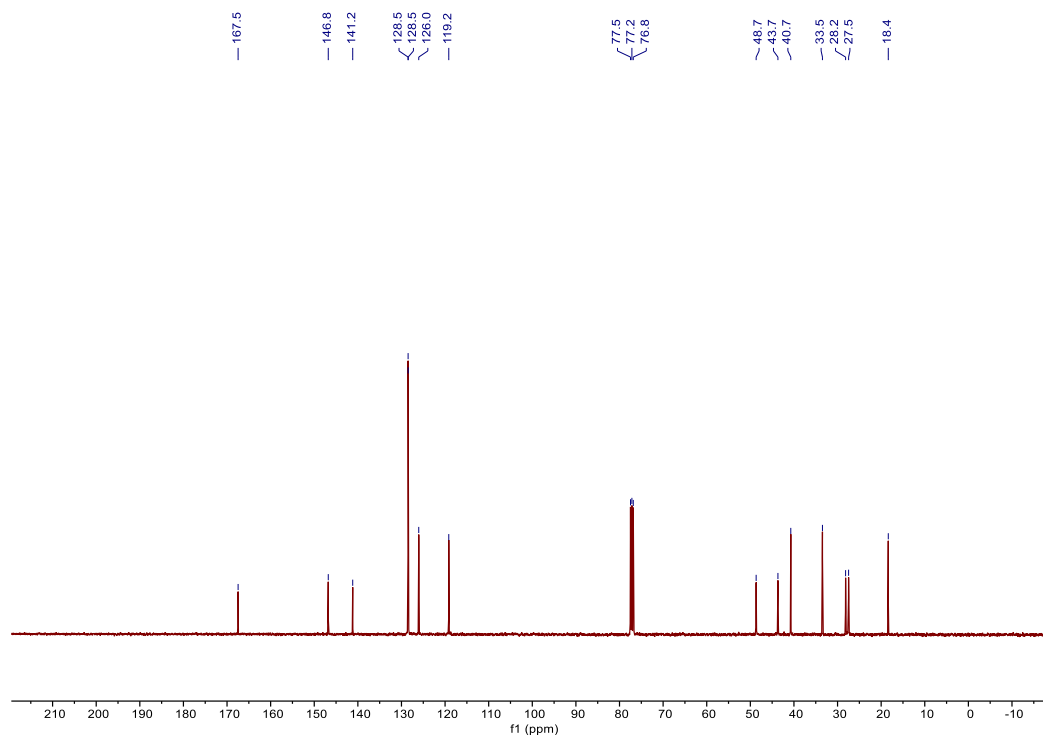

Supplementary Figure 21. <sup>13</sup>C NMR (101 MHz, CDCl<sub>3</sub>) of **1h**.

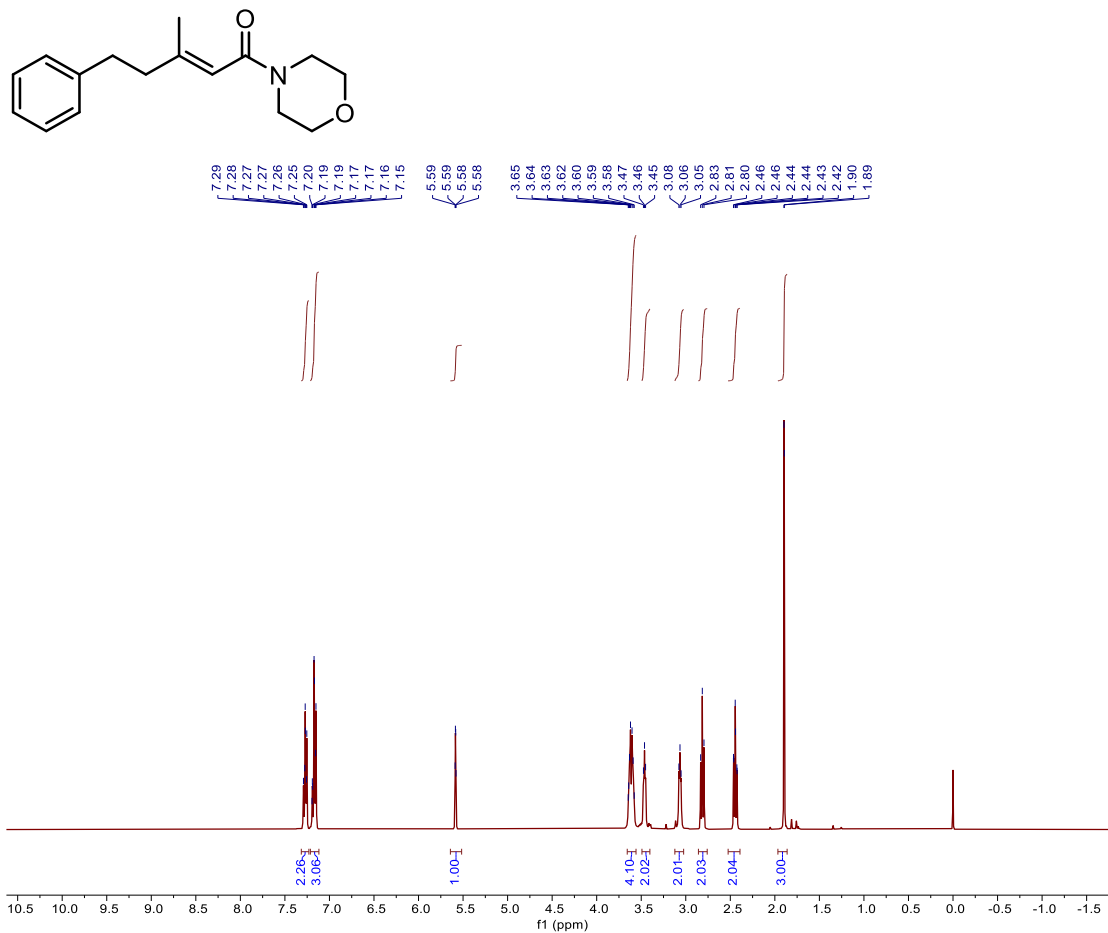

Supplementary Figure 22. <sup>1</sup>H NMR (400 MHz, CDCl<sub>3</sub>) of **1i**.

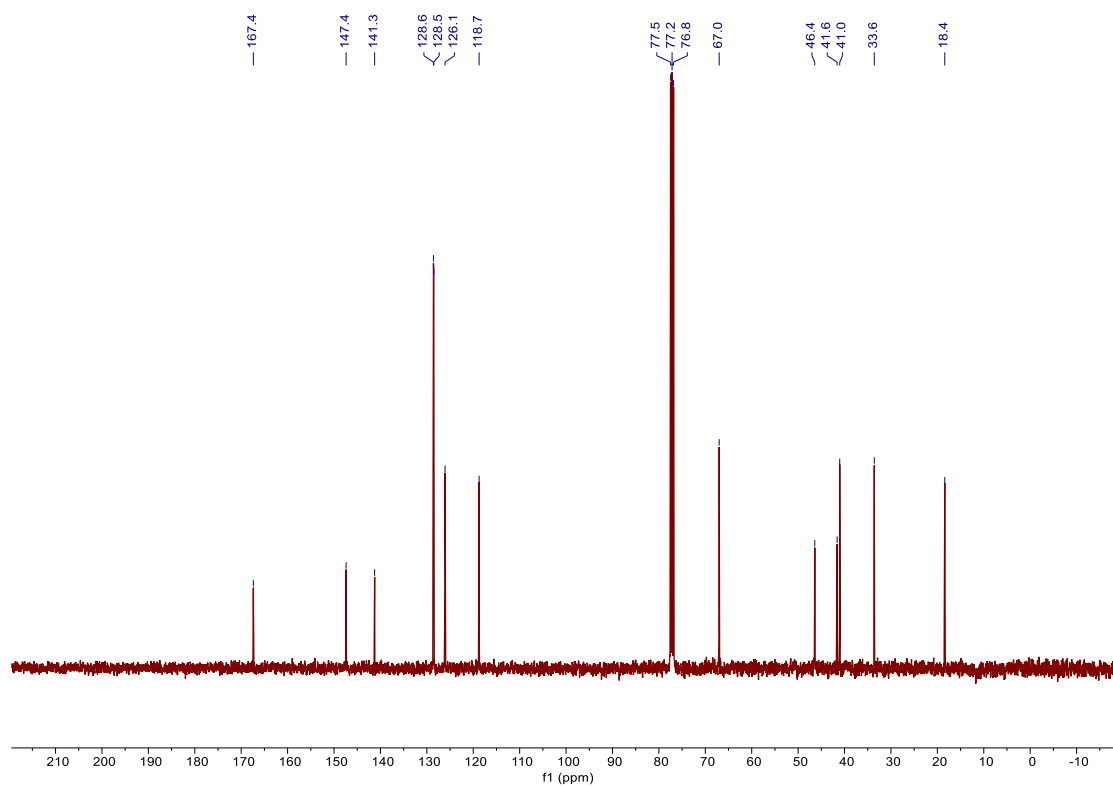

Supplementary Figure 23. <sup>13</sup>C NMR (101 MHz, CDCl<sub>3</sub>) of **1i**.

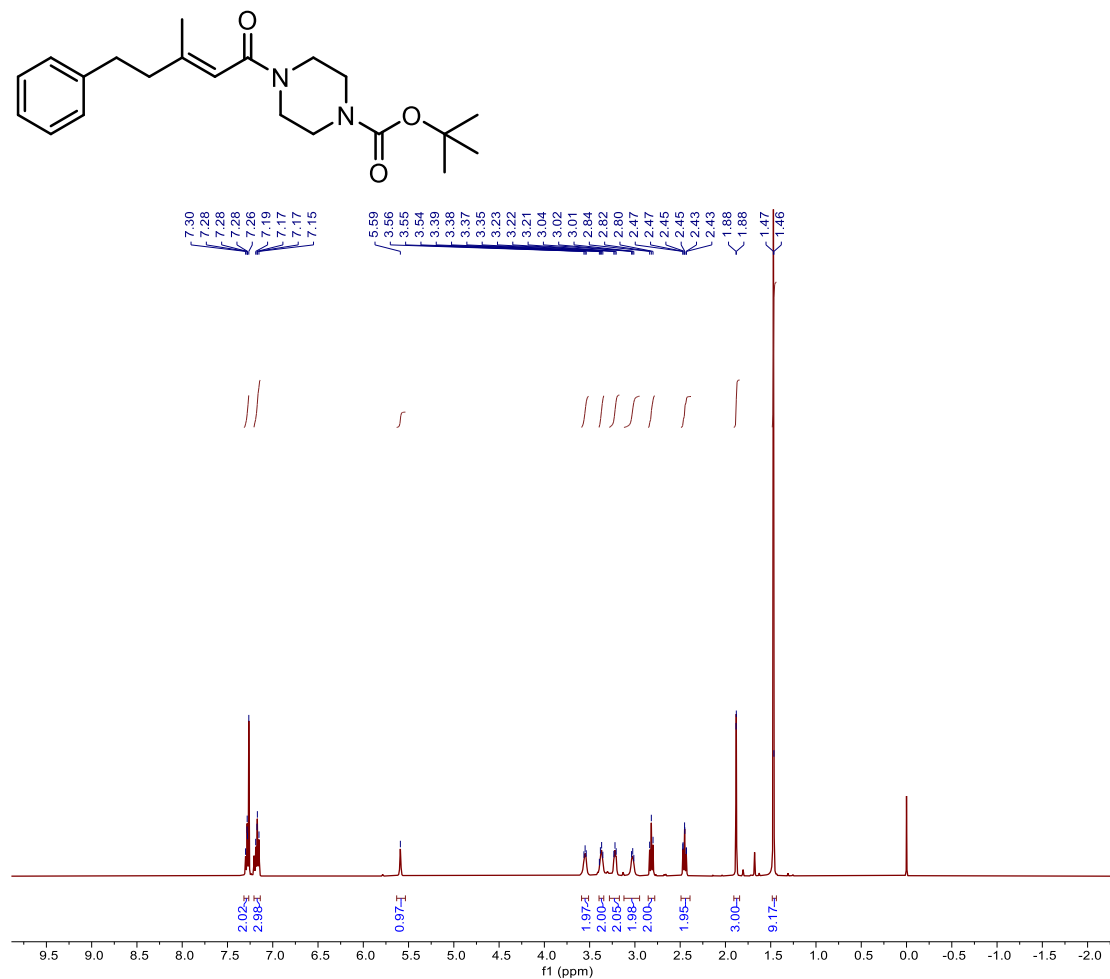

Supplementary Figure 24. <sup>1</sup>H NMR (400 MHz, CDCl<sub>3</sub>) of **1j**.

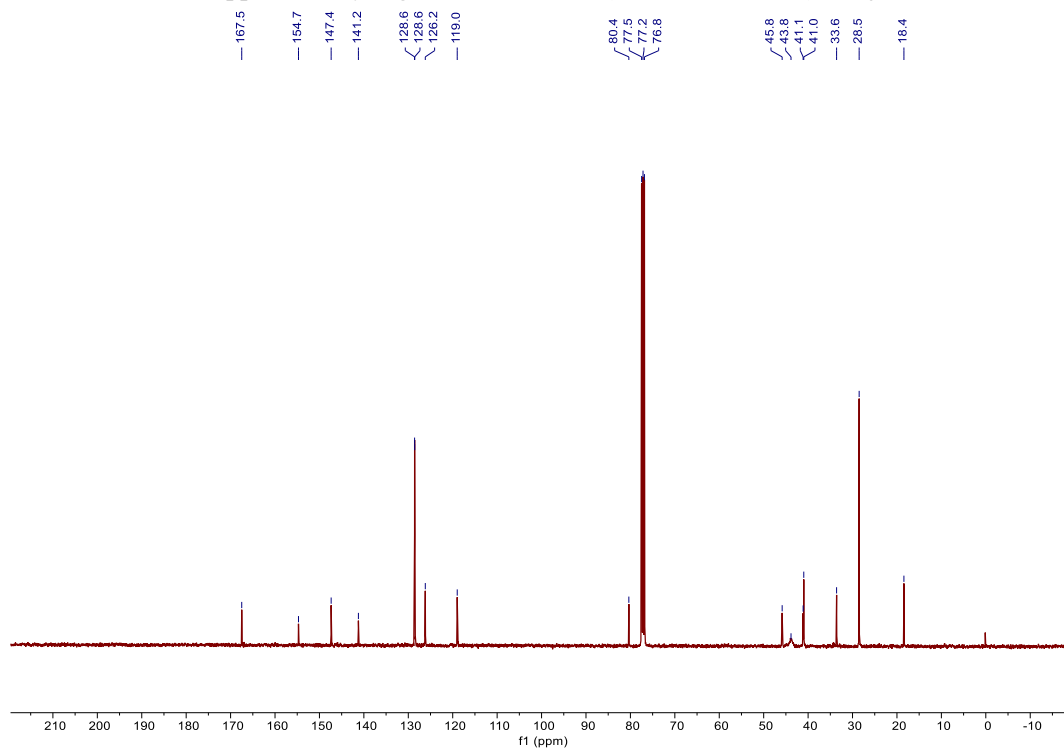

Supplementary Figure 25. <sup>13</sup>C NMR (101 MHz, CDCl<sub>3</sub>) of **1j**.

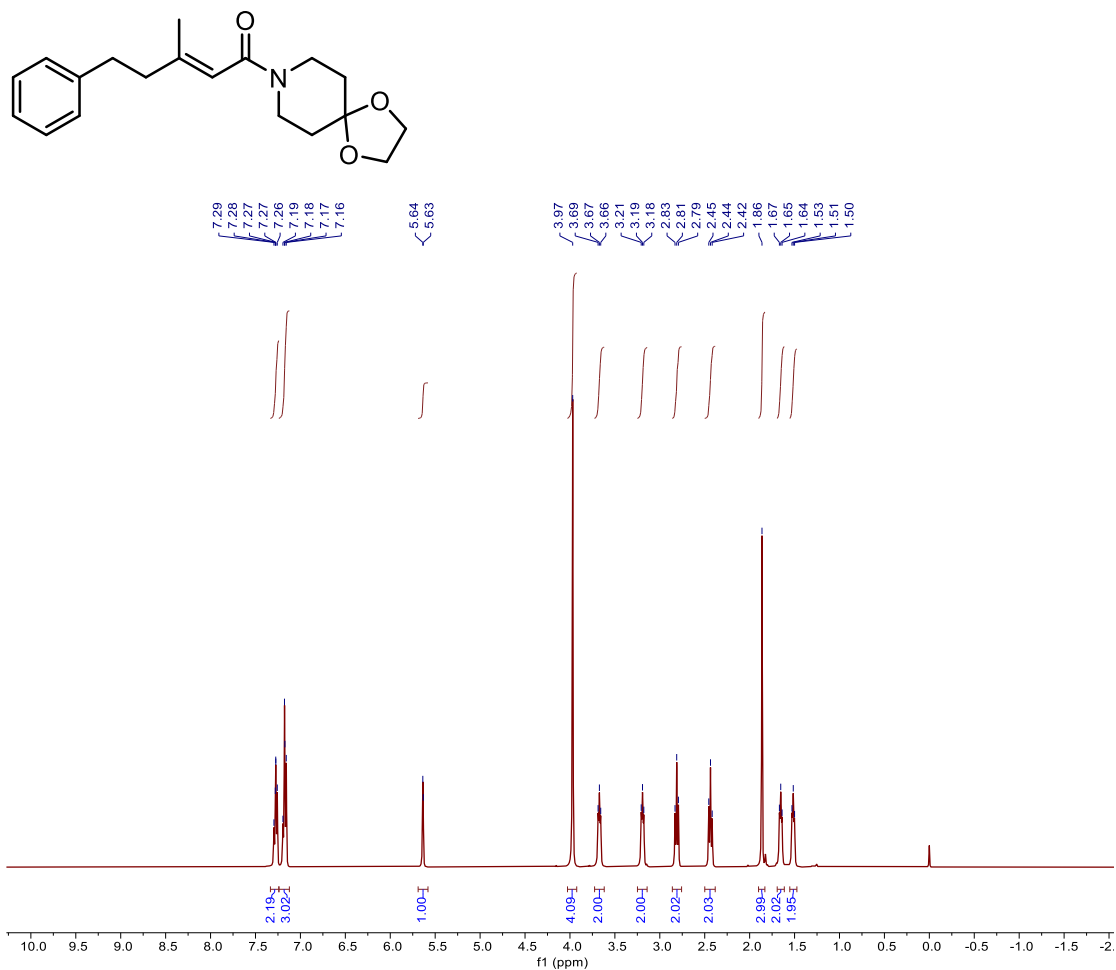

Supplementary Figure 26. <sup>1</sup>H NMR (400 MHz, CDCl<sub>3</sub>) of **1k**.

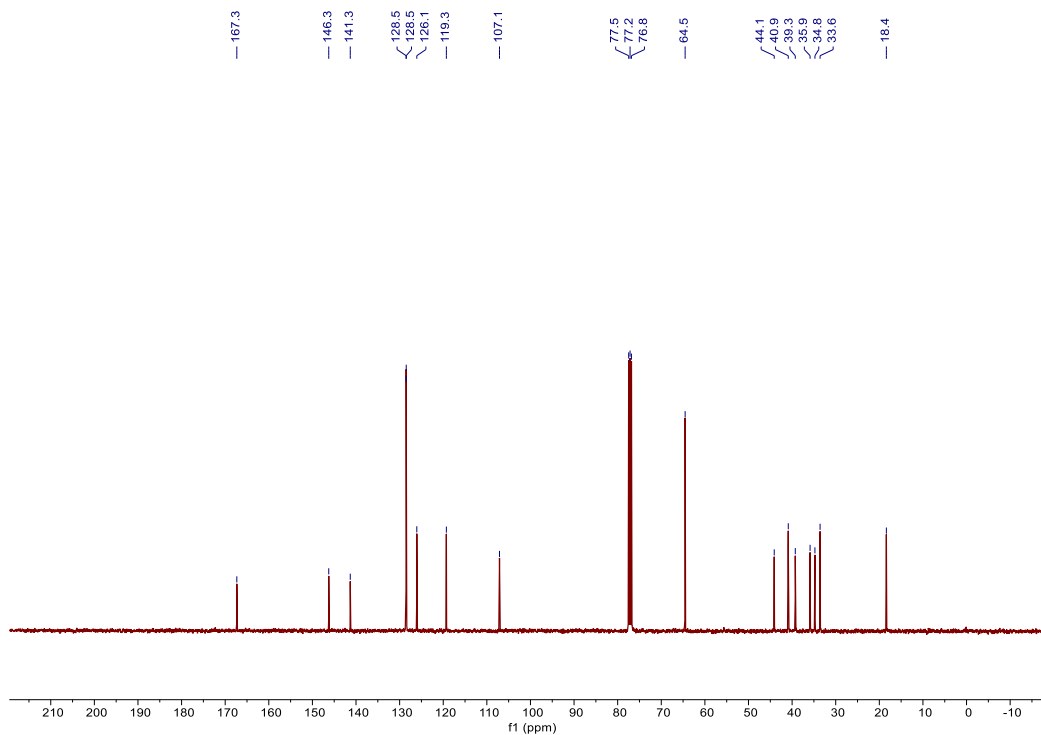

Supplementary Figure 27. <sup>13</sup>C NMR (101 MHz, CDCl<sub>3</sub>) of **1k**.

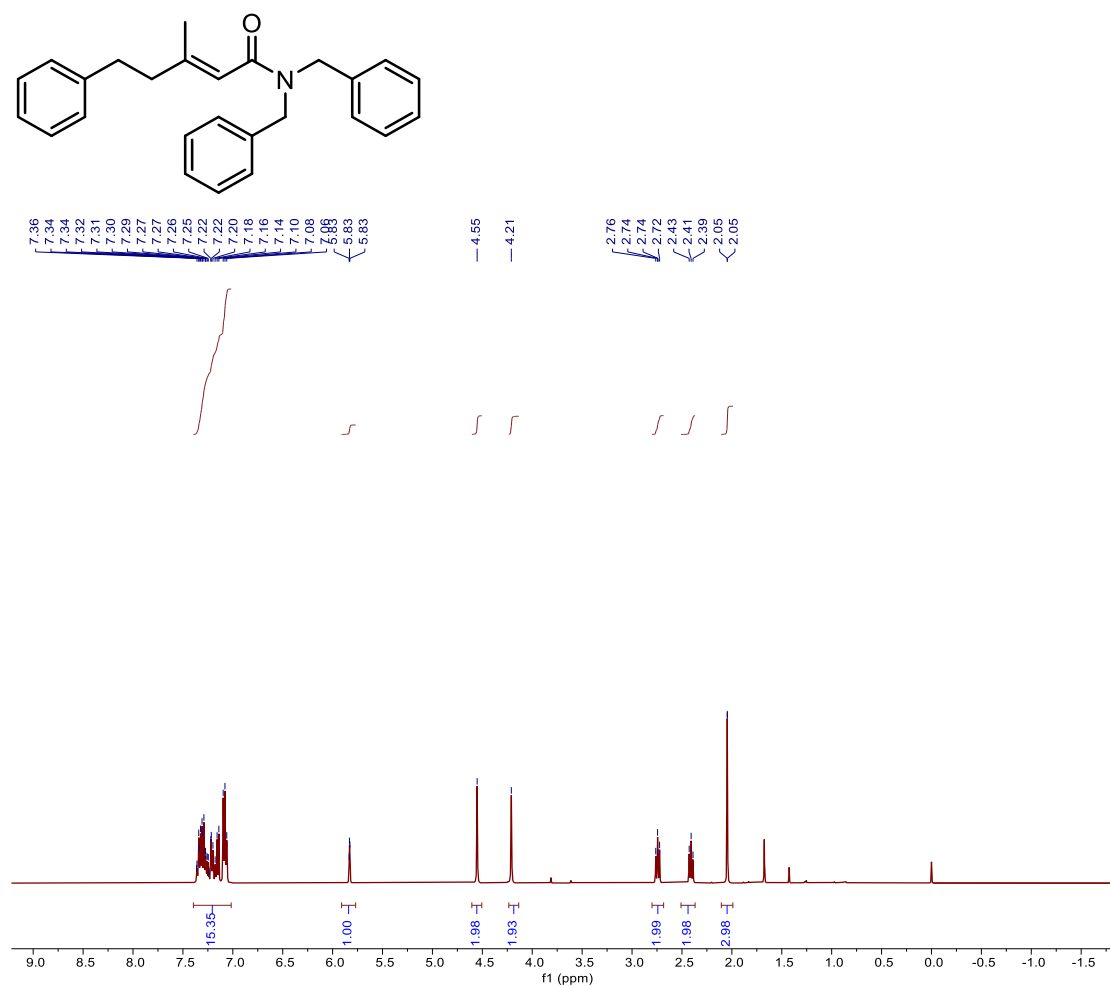

Supplementary Figure 28. <sup>1</sup>H NMR (400 MHz, CDCl<sub>3</sub>) of **11**.

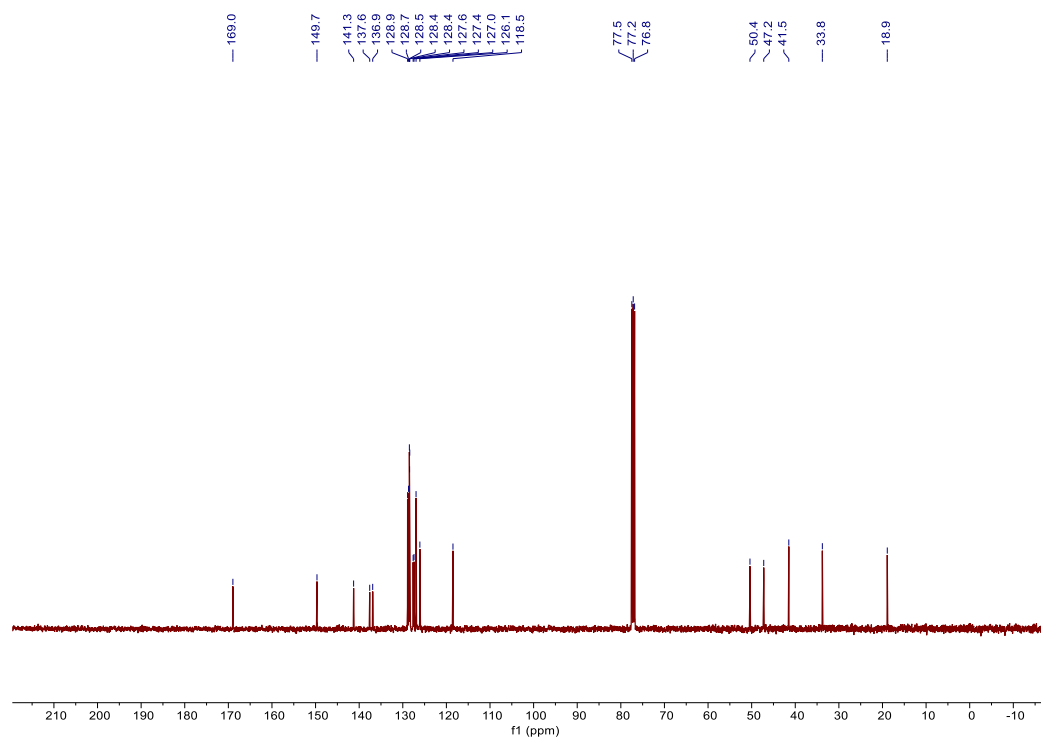

Supplementary Figure 29. <sup>13</sup>C NMR (101 MHz, CDCl<sub>3</sub>) of **11**.

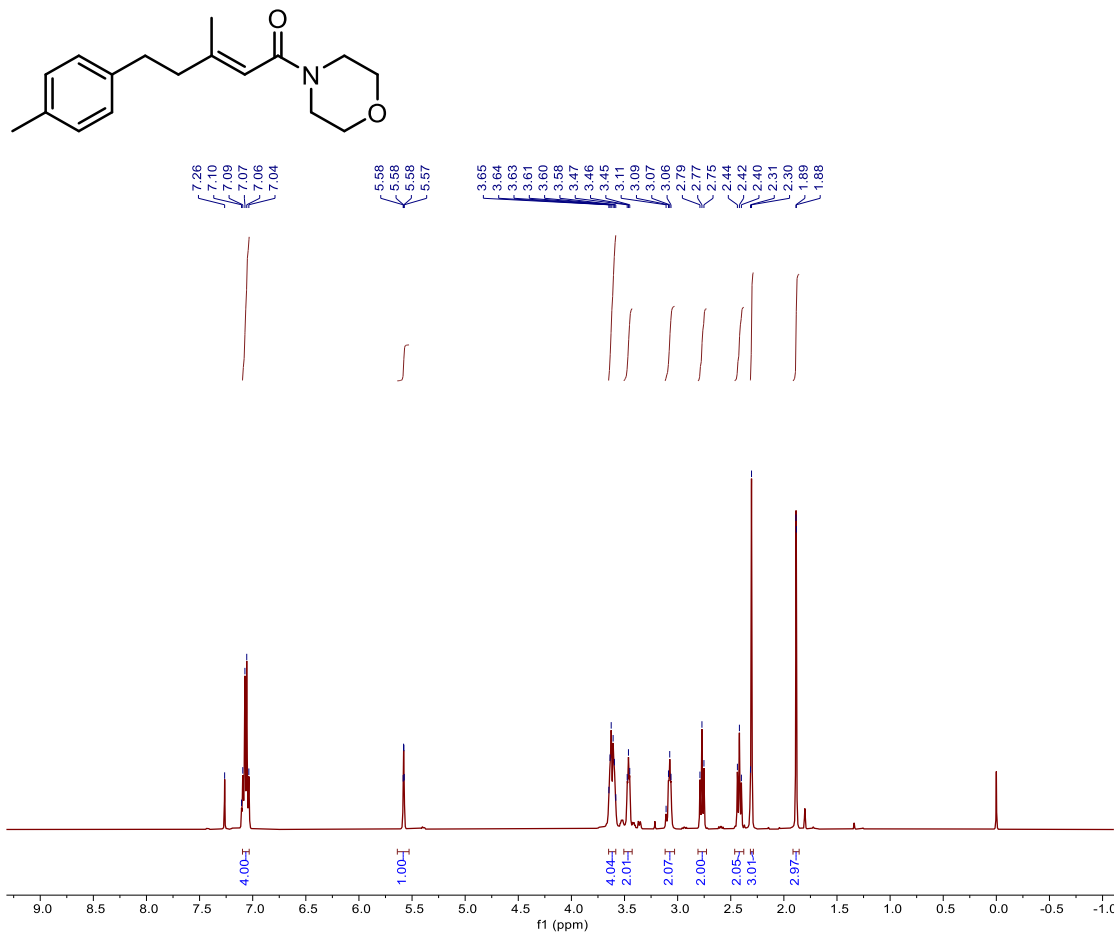

Supplementary Figure 30. <sup>1</sup>H NMR (400 MHz, CDCl<sub>3</sub>) of **1m**.

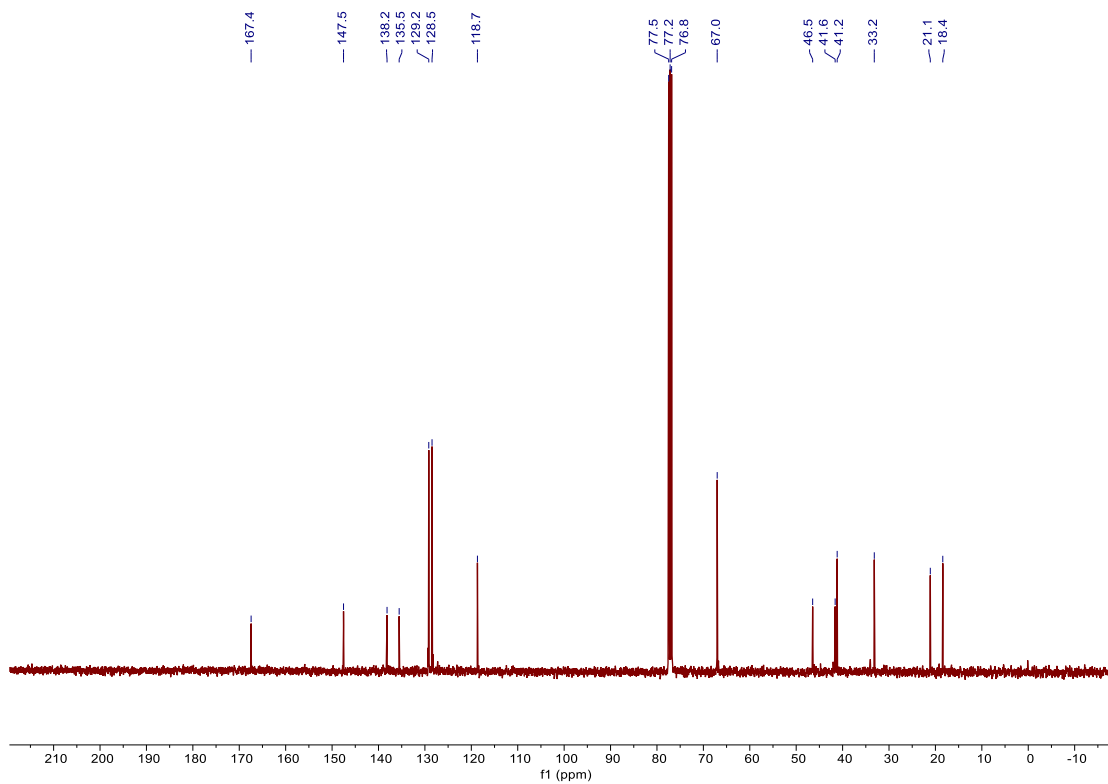

Supplementary Figure 31. <sup>13</sup>C NMR (101 MHz, CDCl<sub>3</sub>) of **1m**.



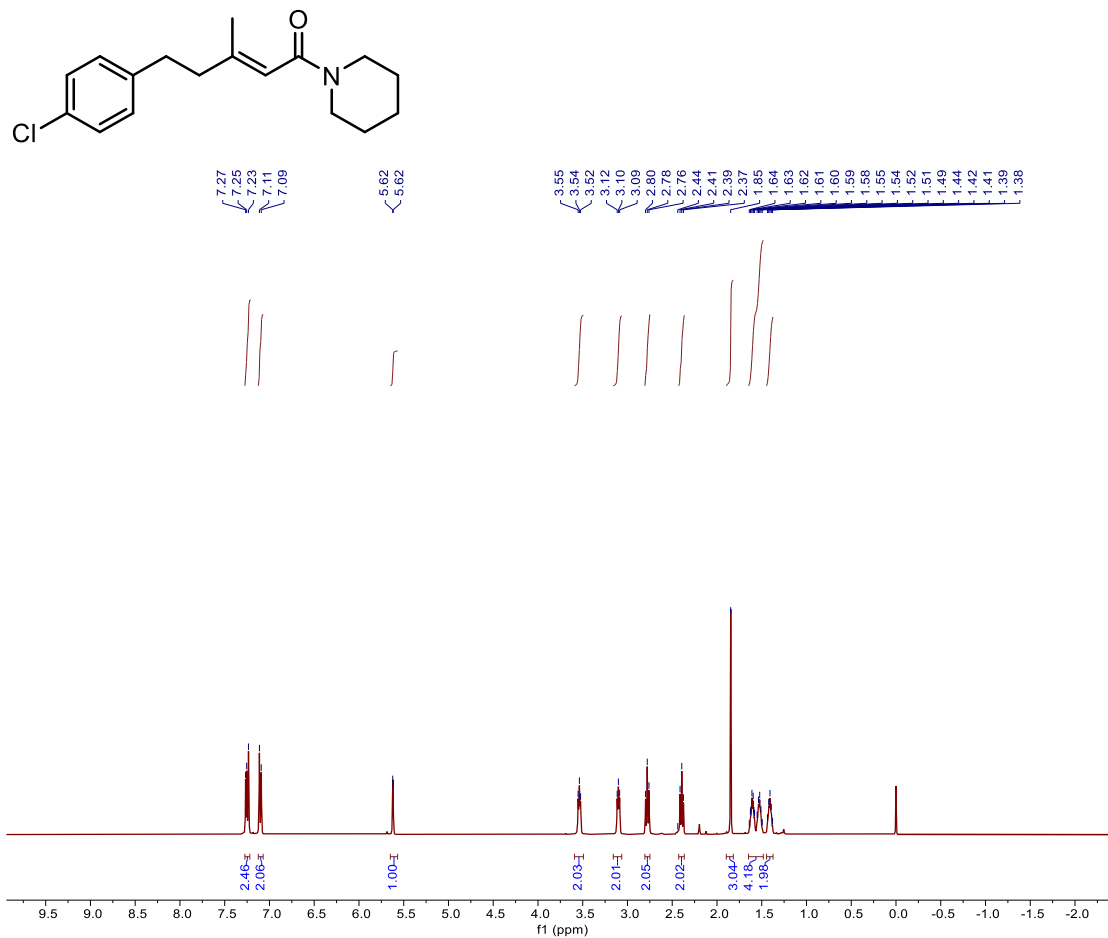

Supplementary Figure 32. <sup>1</sup>H NMR (400 MHz, CDCl<sub>3</sub>) of **1n**.

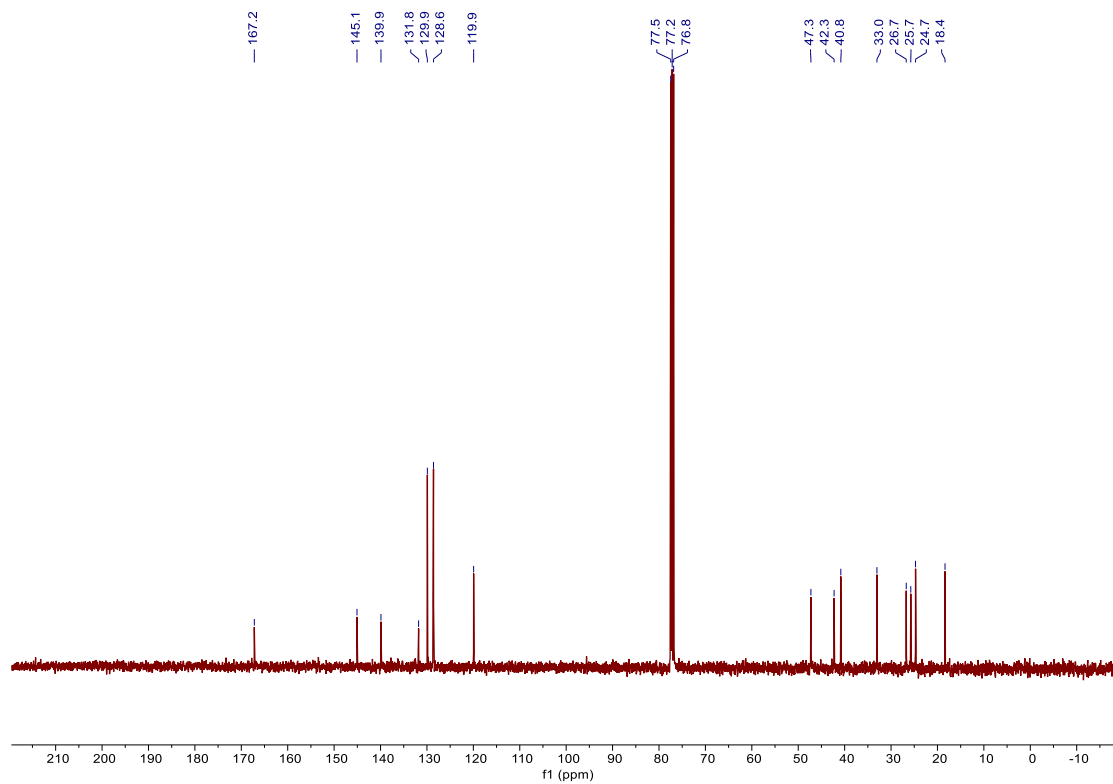

Supplementary Figure 33. <sup>13</sup>C NMR (101 MHz, CDCl<sub>3</sub>) of **1n**.

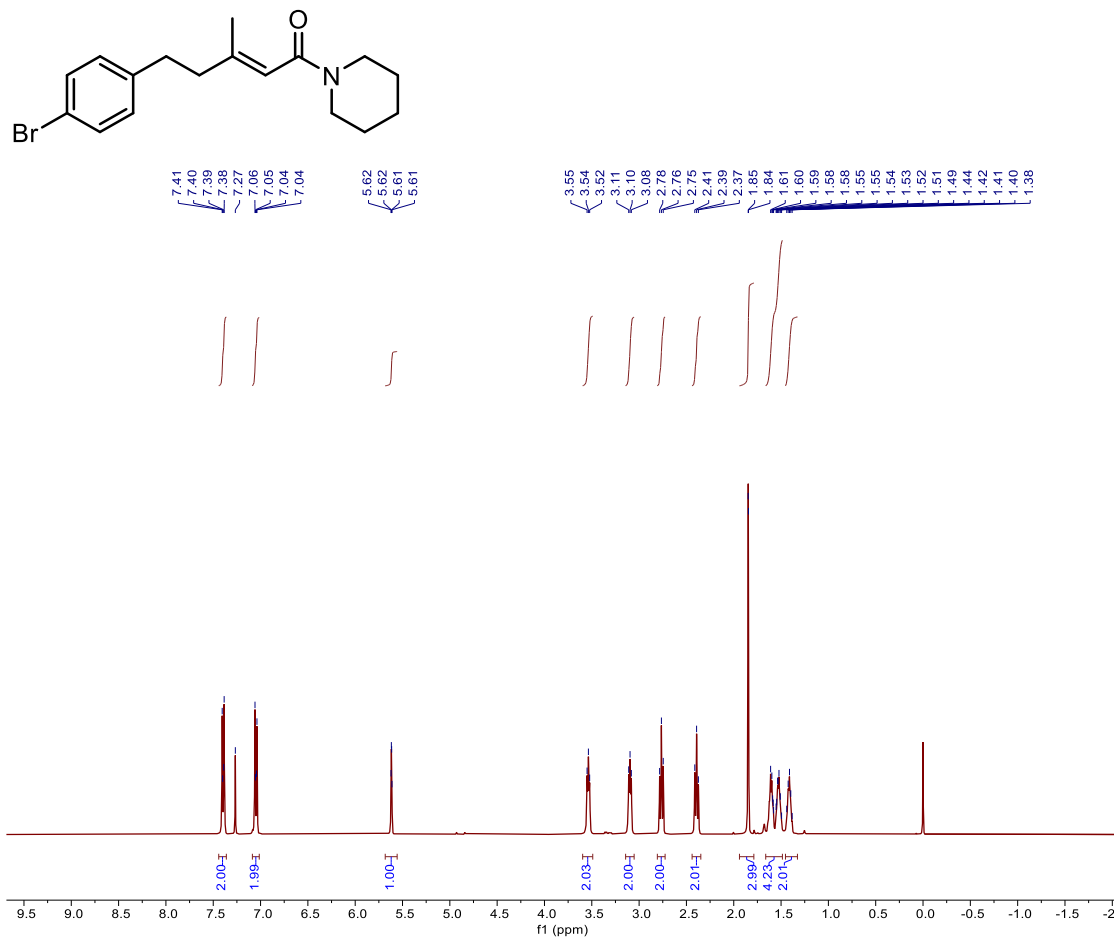

Supplementary Figure 34. <sup>1</sup>H NMR (400 MHz, CDCl<sub>3</sub>) of **10**.

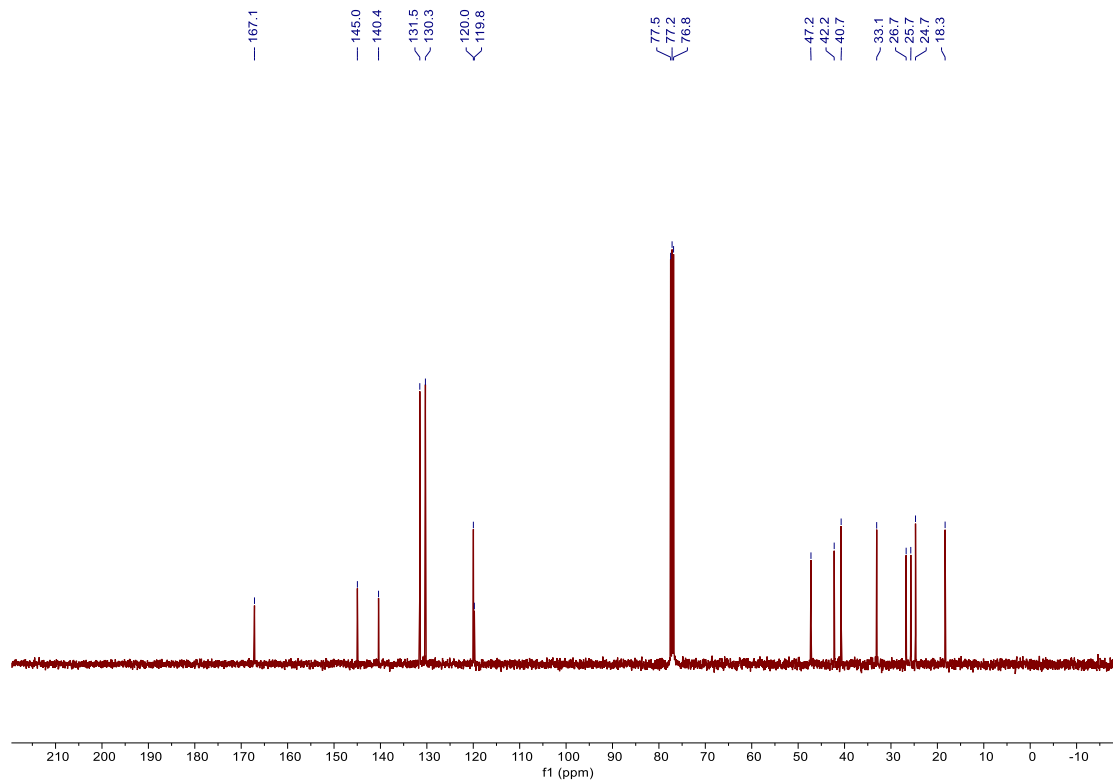

Supplementary Figure 35. <sup>13</sup>C NMR (101 MHz, CDCl<sub>3</sub>) of **10**.

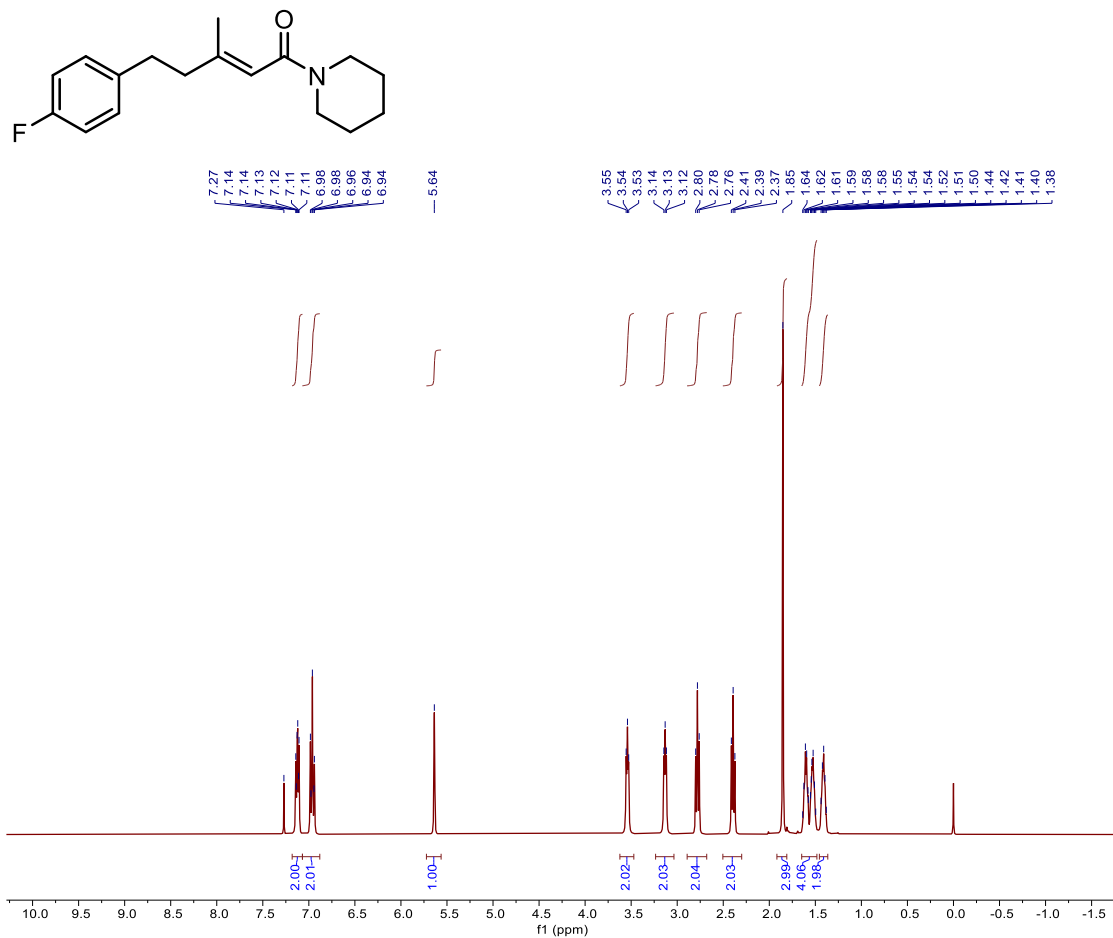

Supplementary Figure 36. <sup>1</sup>H NMR (400 MHz, CDCl<sub>3</sub>) of **1p**.

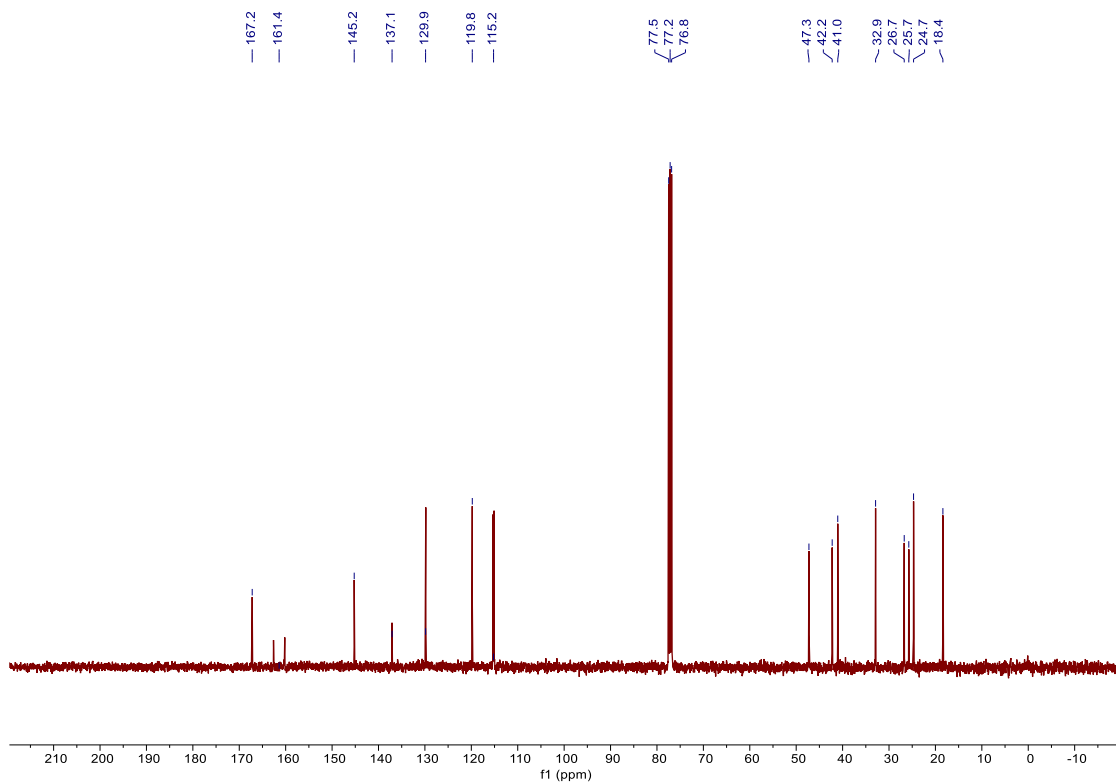

Supplementary Figure 37. <sup>13</sup>C NMR (101 MHz, CDCl<sub>3</sub>) of **1p**.

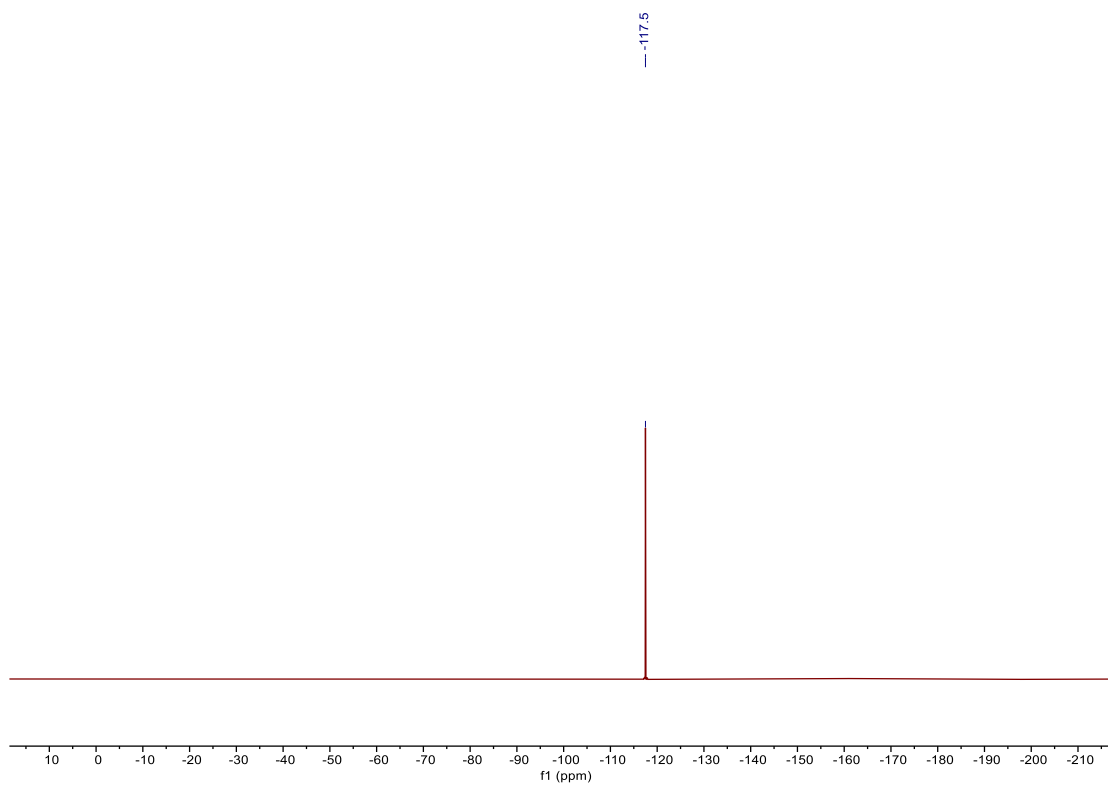

Supplementary Figure 38.  $^{19}\text{F}$  NMR (376 MHz,  $\text{CDCl}_3$ ) of **1p**.

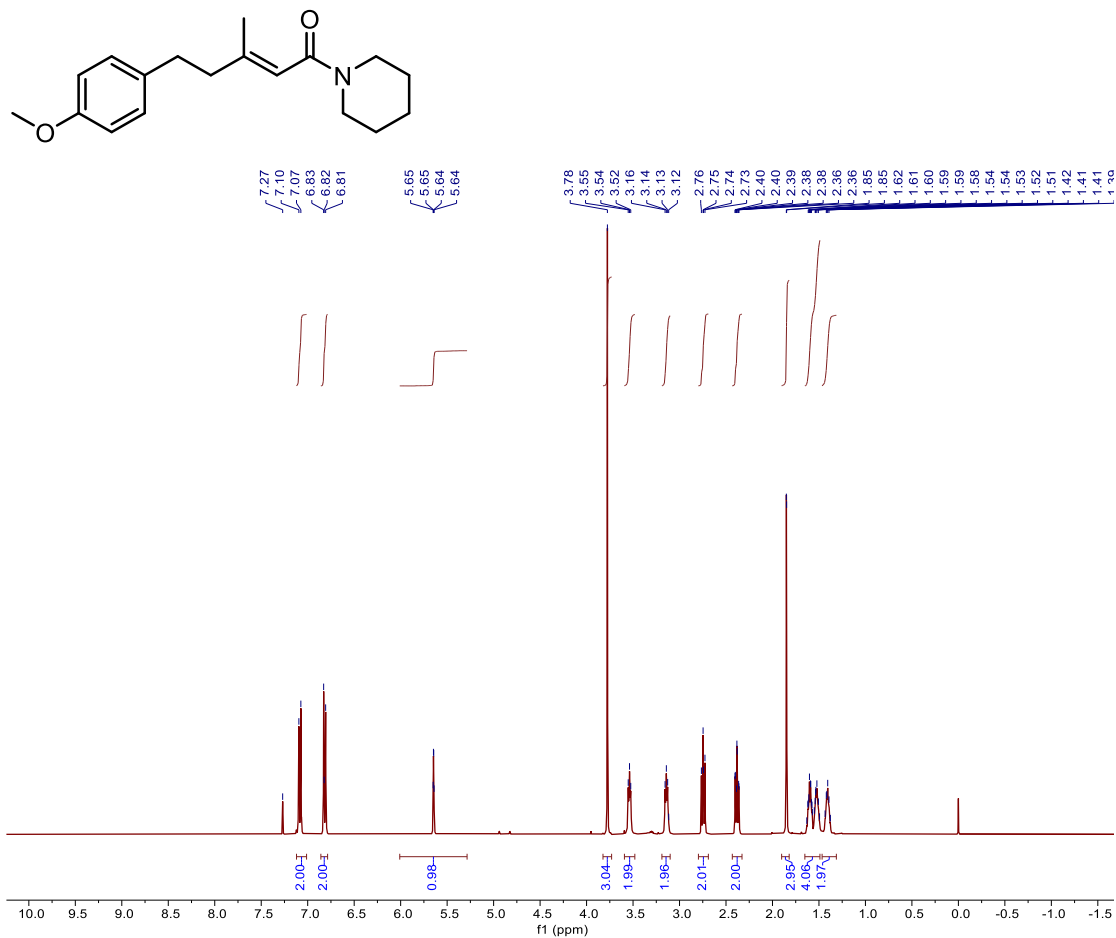

Supplementary Figure 39. <sup>1</sup>H NMR (400 MHz, CDCl<sub>3</sub>) of **1q**.

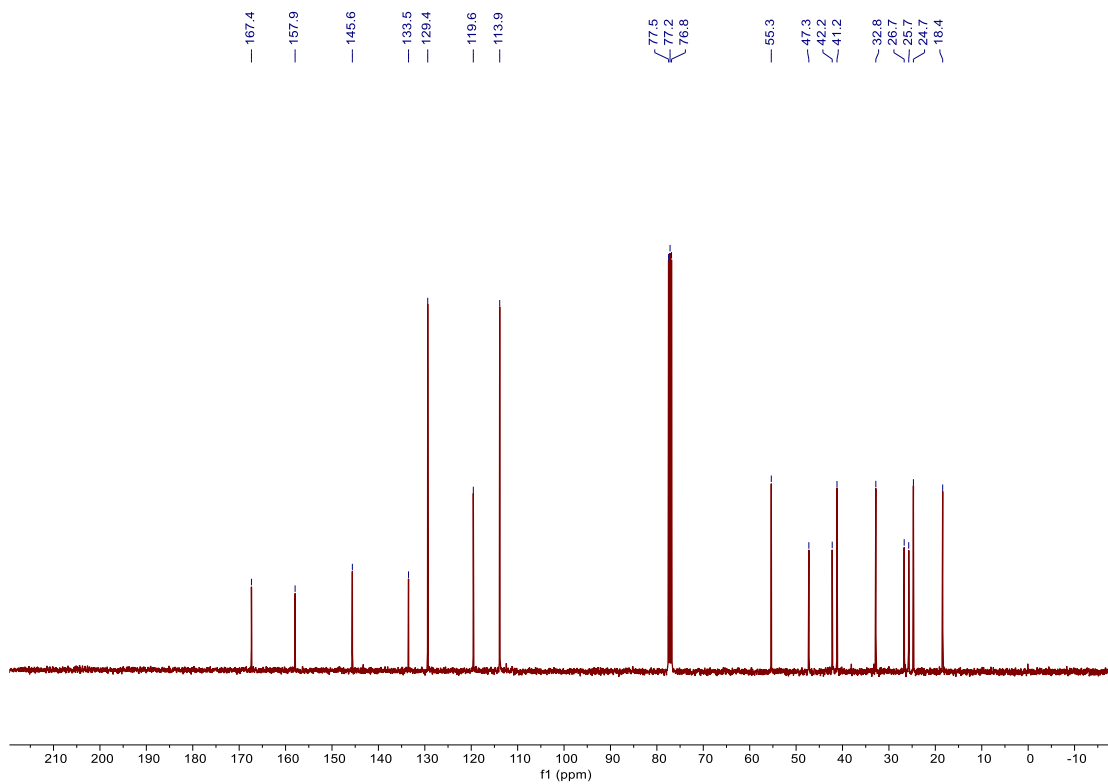

Supplementary Figure 40. <sup>13</sup>C NMR (101 MHz, CDCl<sub>3</sub>) of **1q**.

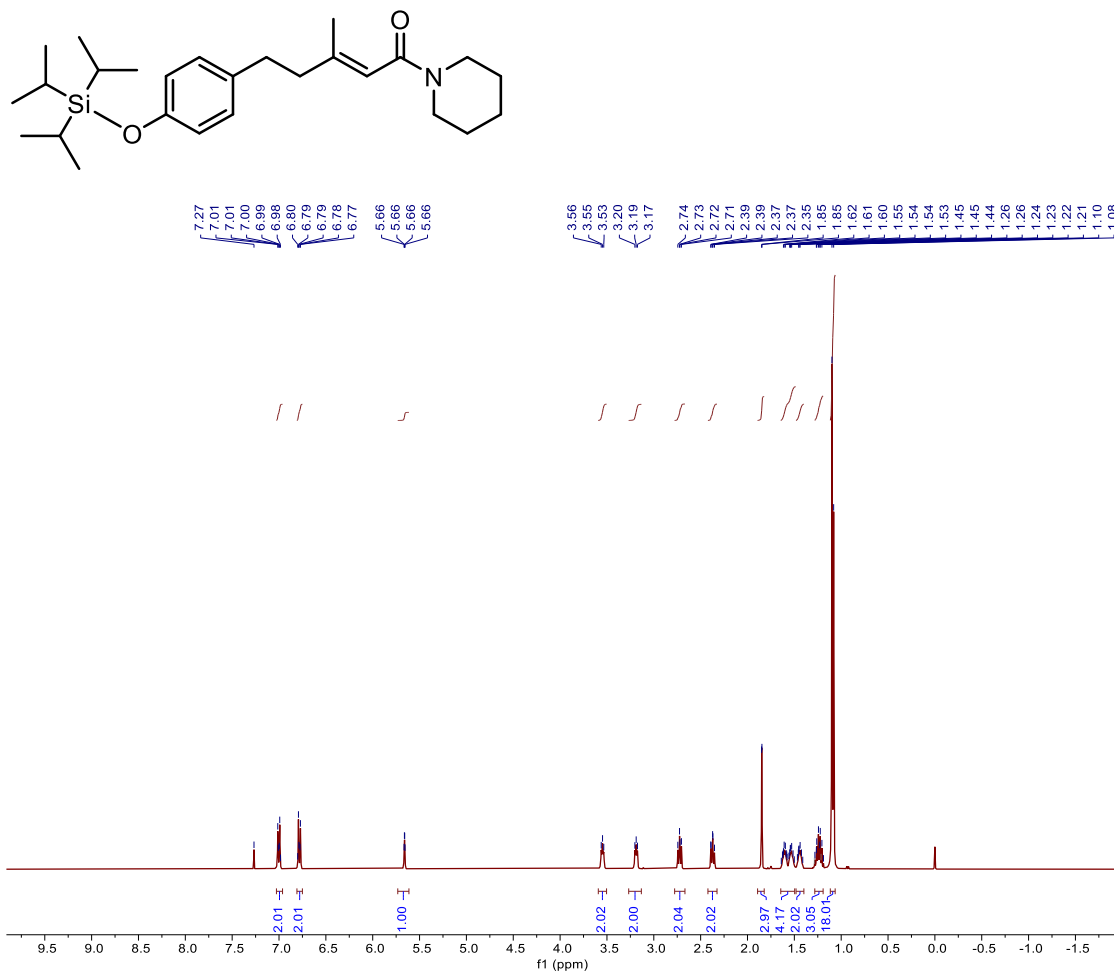

Supplementary Figure 41. <sup>1</sup>H NMR (400 MHz, CDCl<sub>3</sub>) of **1r**.

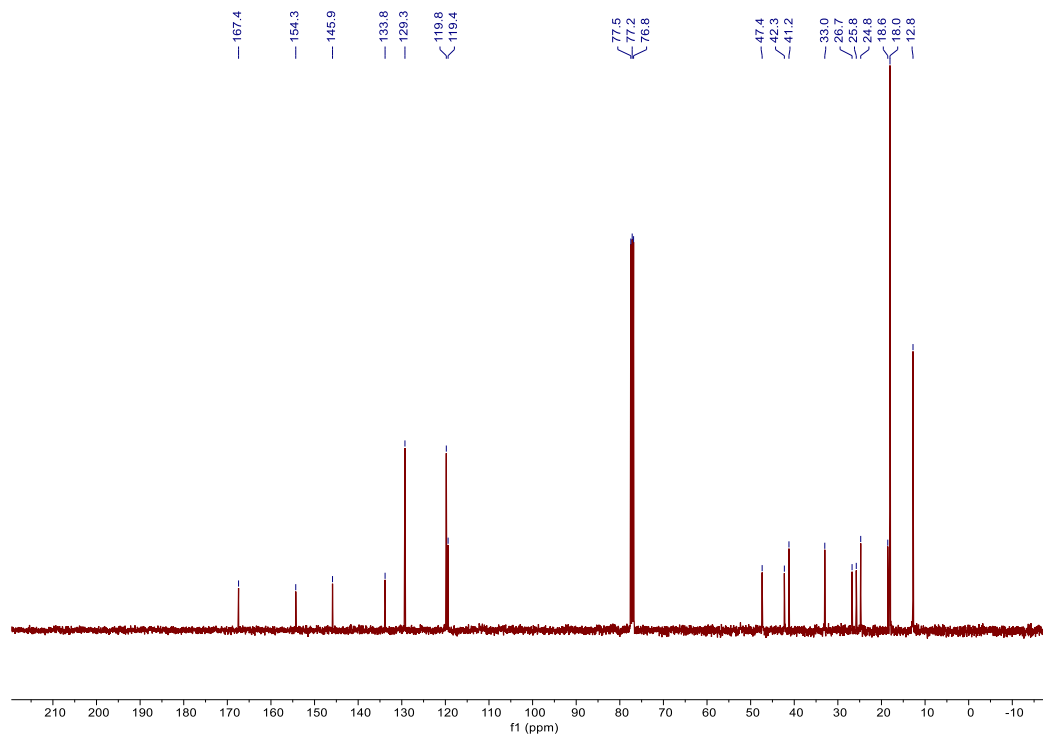

Supplementary Figure 42. <sup>13</sup>C NMR (101 MHz, CDCl<sub>3</sub>) of **1r**.

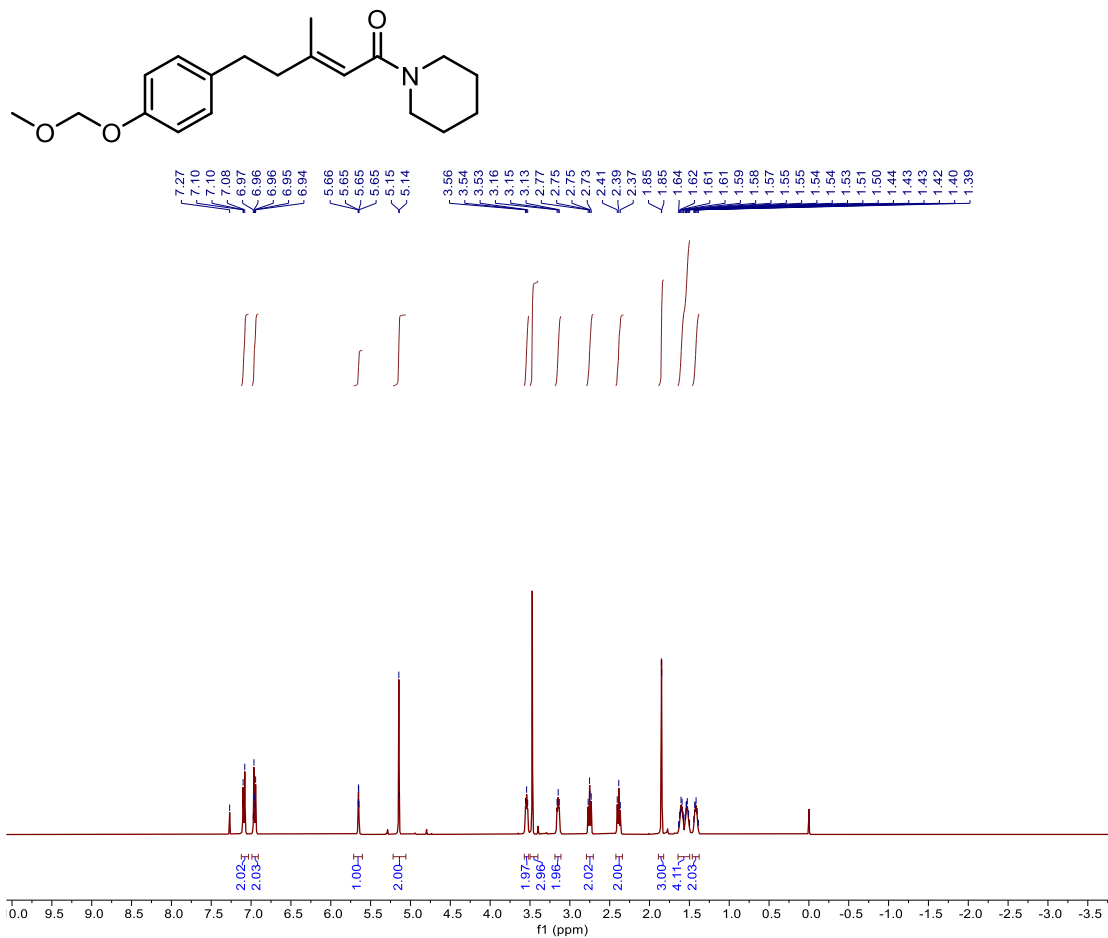

Supplementary Figure 43. <sup>1</sup>H NMR (400 MHz, CDCl<sub>3</sub>) of **1s**.

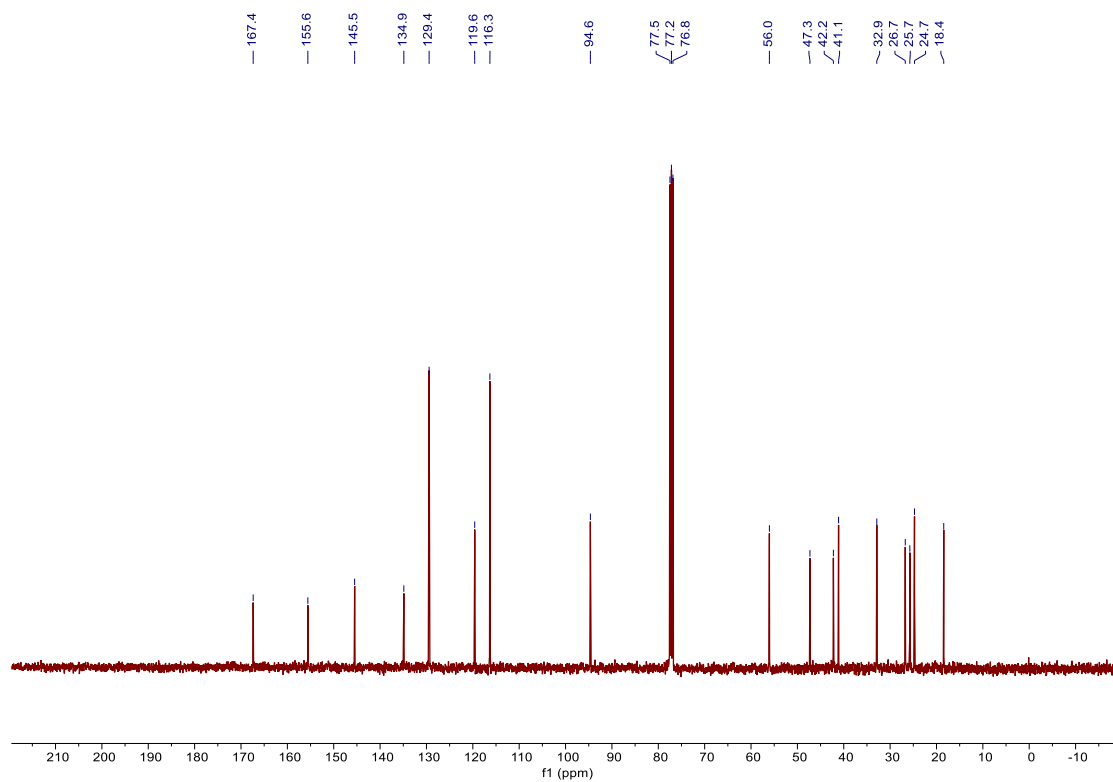

Supplementary Figure 44. <sup>13</sup>C NMR (101 MHz, CDCl<sub>3</sub>) of **1s**.

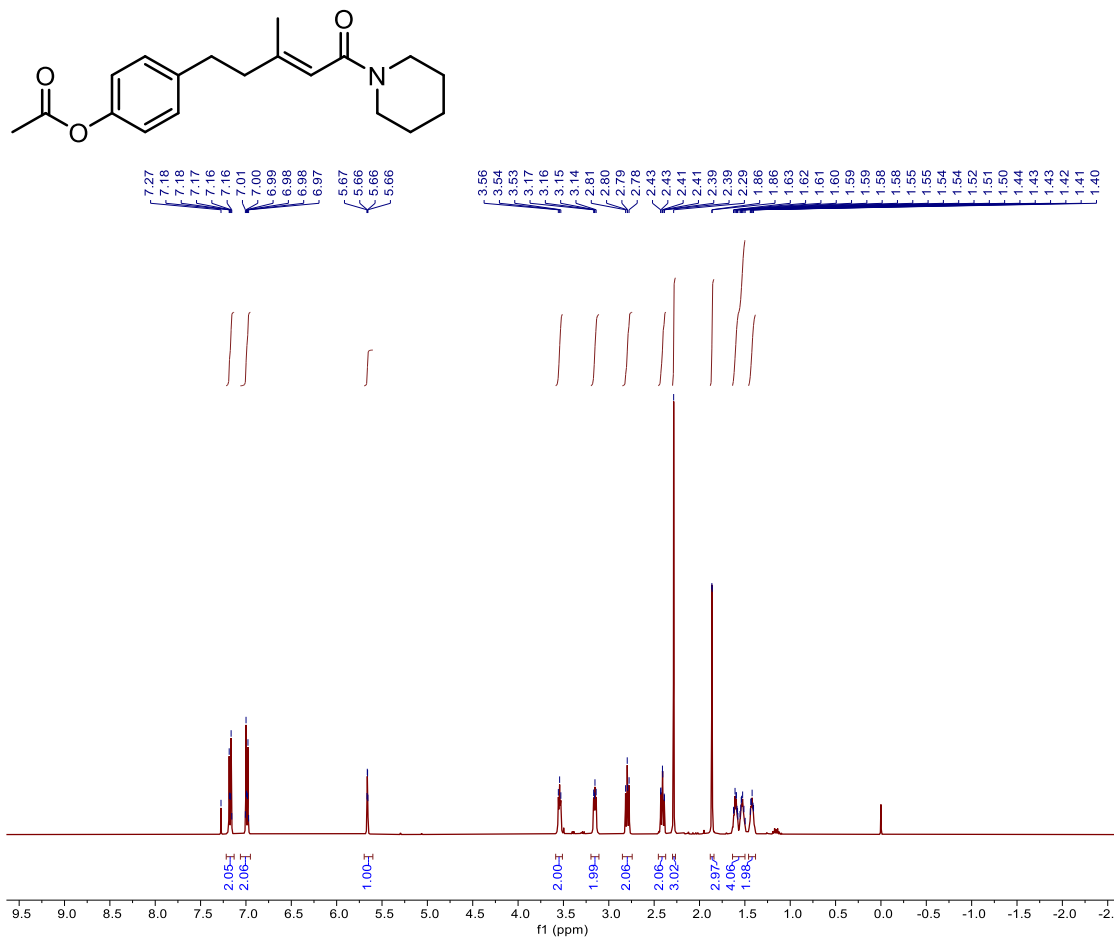

Supplementary Figure 45. <sup>1</sup>H NMR (400 MHz, CDCl<sub>3</sub>) of 1t.

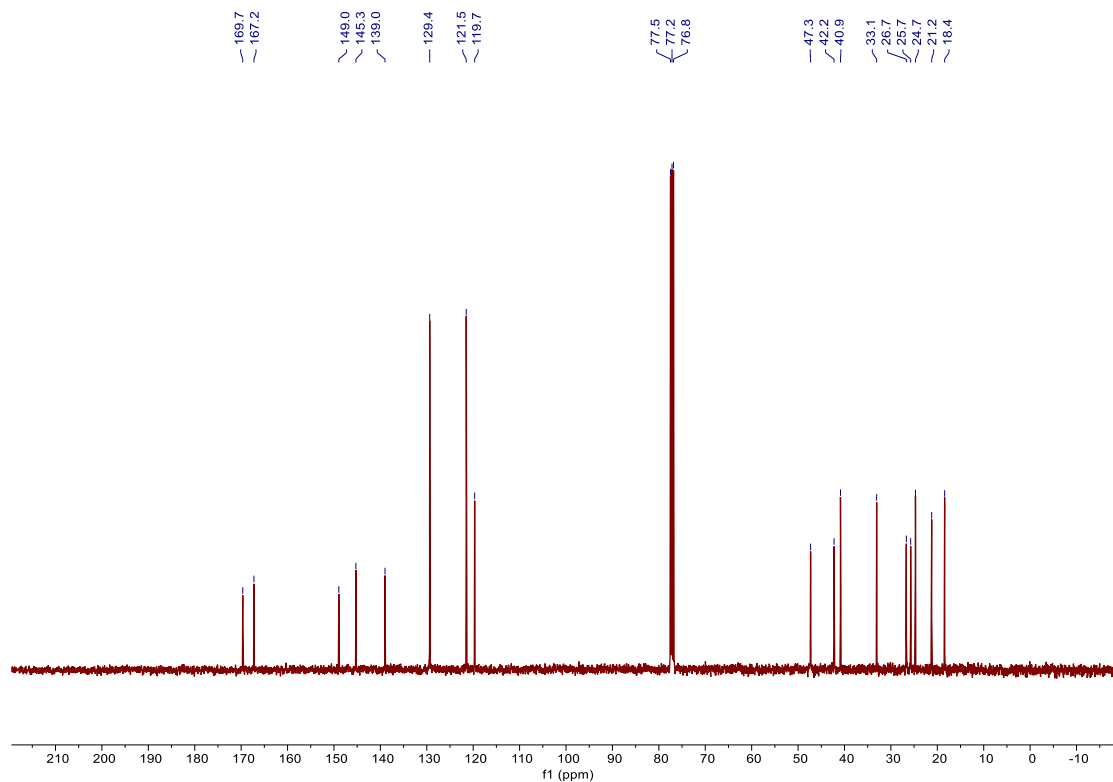

Supplementary Figure 46. <sup>13</sup>C NMR (101 MHz, CDCl<sub>3</sub>) of 1t.



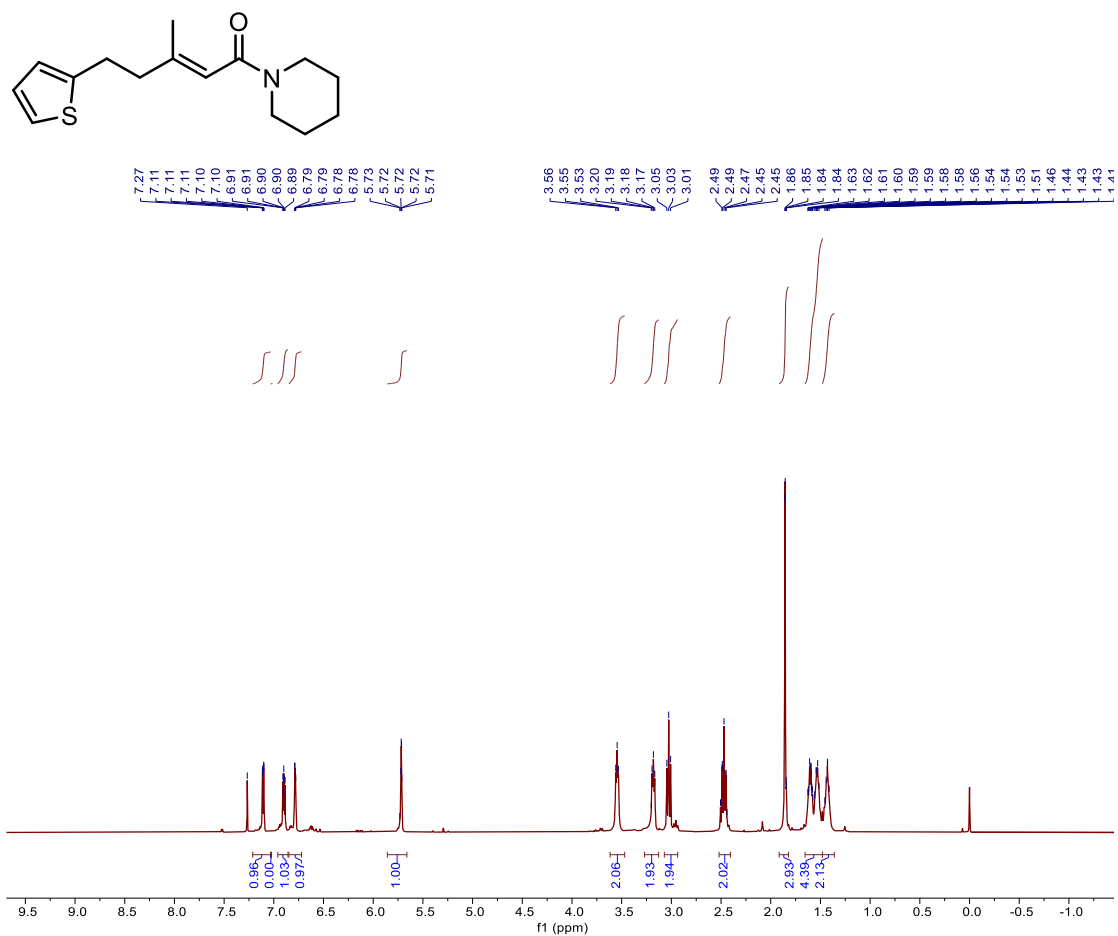

Supplementary Figure 47. <sup>1</sup>H NMR (400 MHz, CDCl<sub>3</sub>) of **1u**.

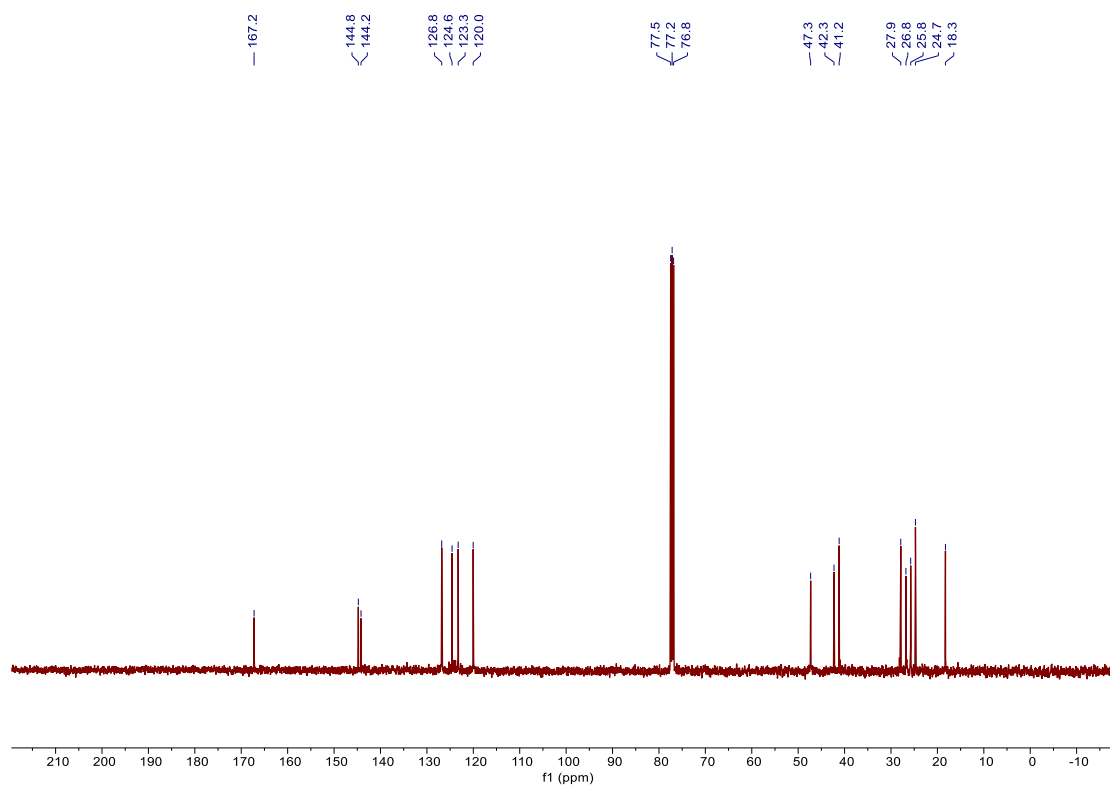

Supplementary Figure 48. <sup>13</sup>C NMR (101 MHz, CDCl<sub>3</sub>) of **1u**.

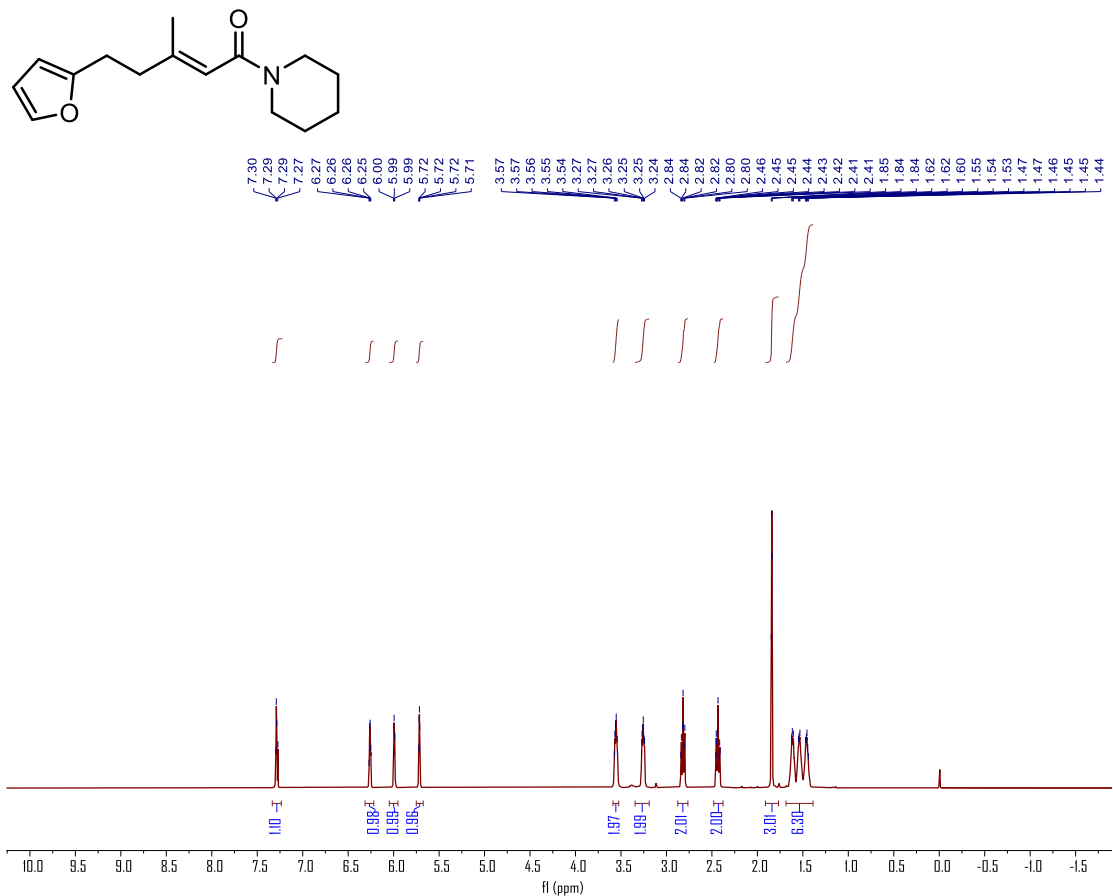

Supplementary Figure 49. <sup>1</sup>H NMR (400 MHz, CDCl<sub>3</sub>) of 1v.

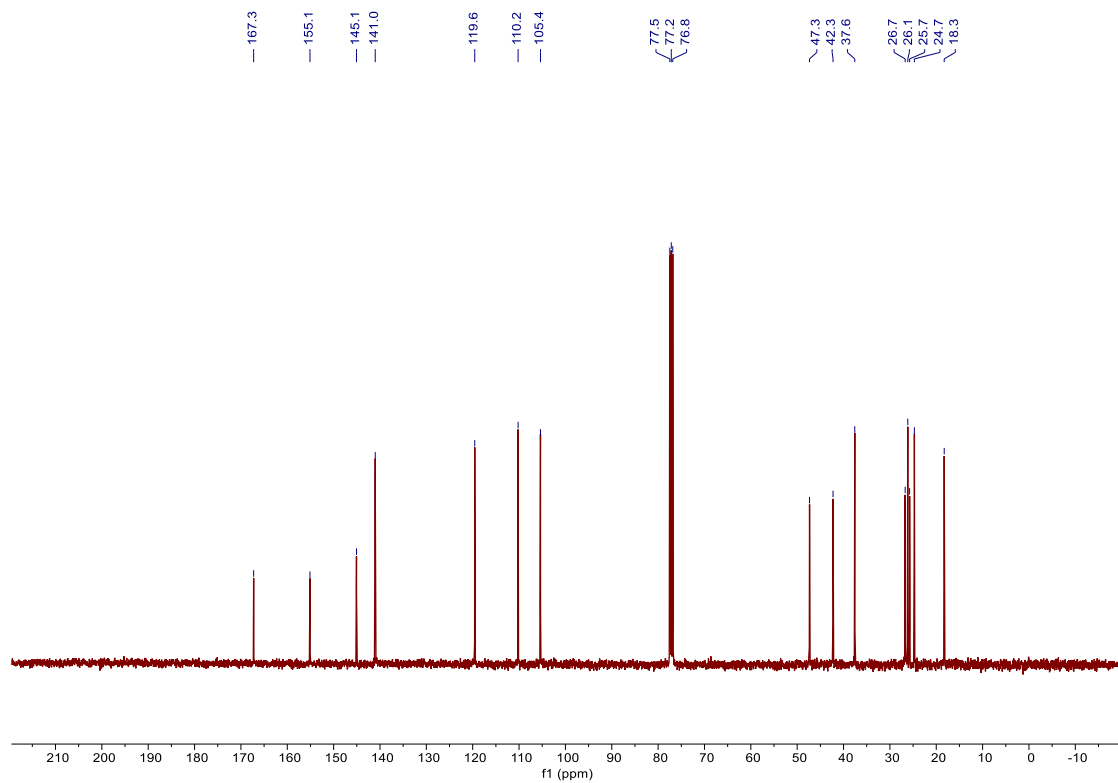

Supplementary Figure 50. <sup>13</sup>C NMR (101 MHz, CDCl<sub>3</sub>) of 1v.

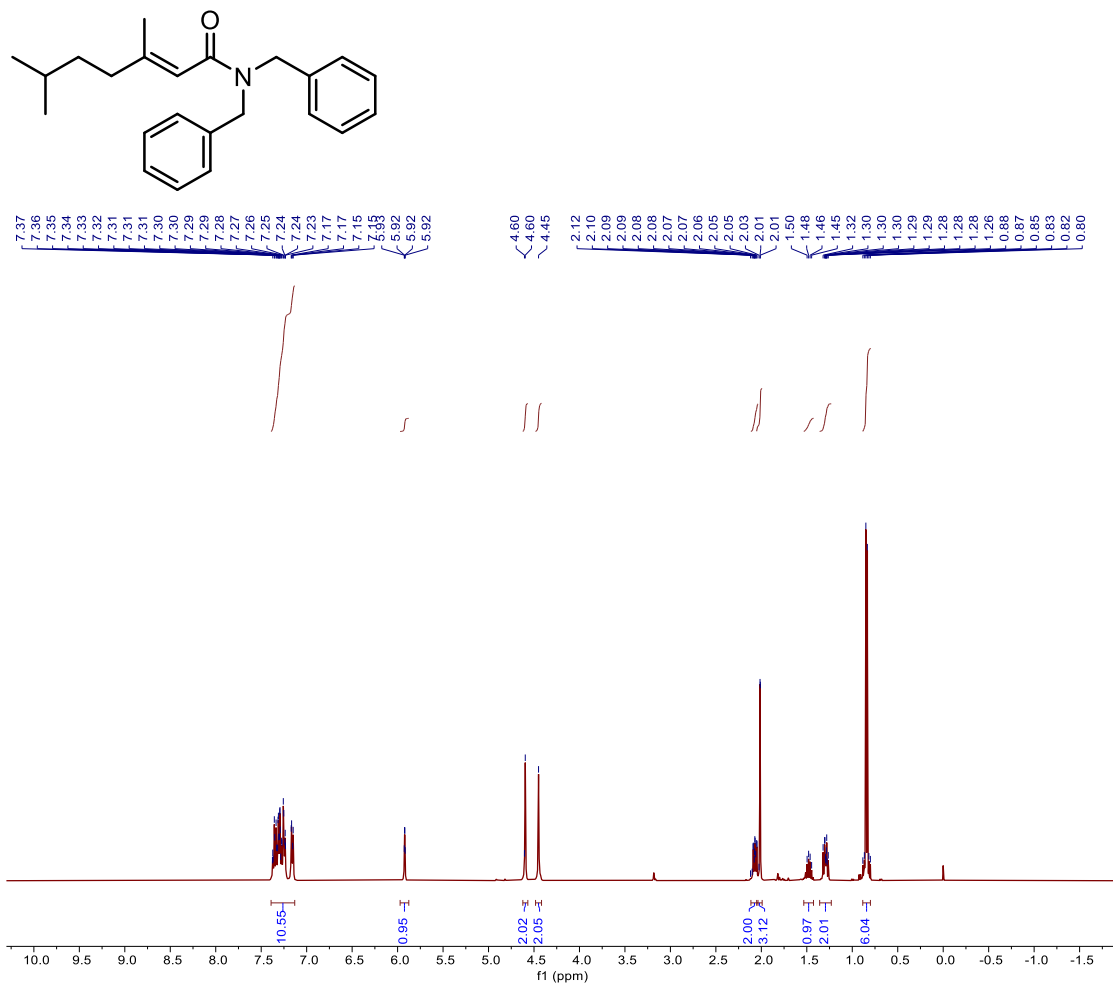

Supplementary Figure 51. <sup>1</sup>H NMR (400 MHz, CDCl<sub>3</sub>) of **1w**.

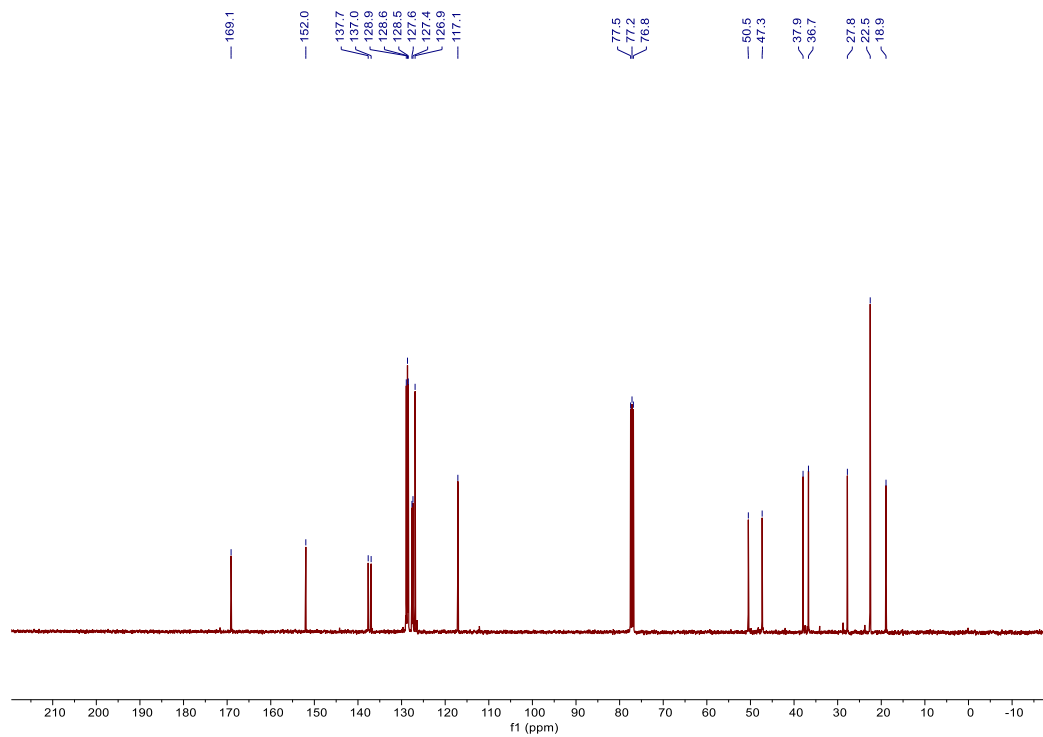

Supplementary Figure 52. <sup>13</sup>C NMR (101 MHz, CDCl<sub>3</sub>) of **1w**.

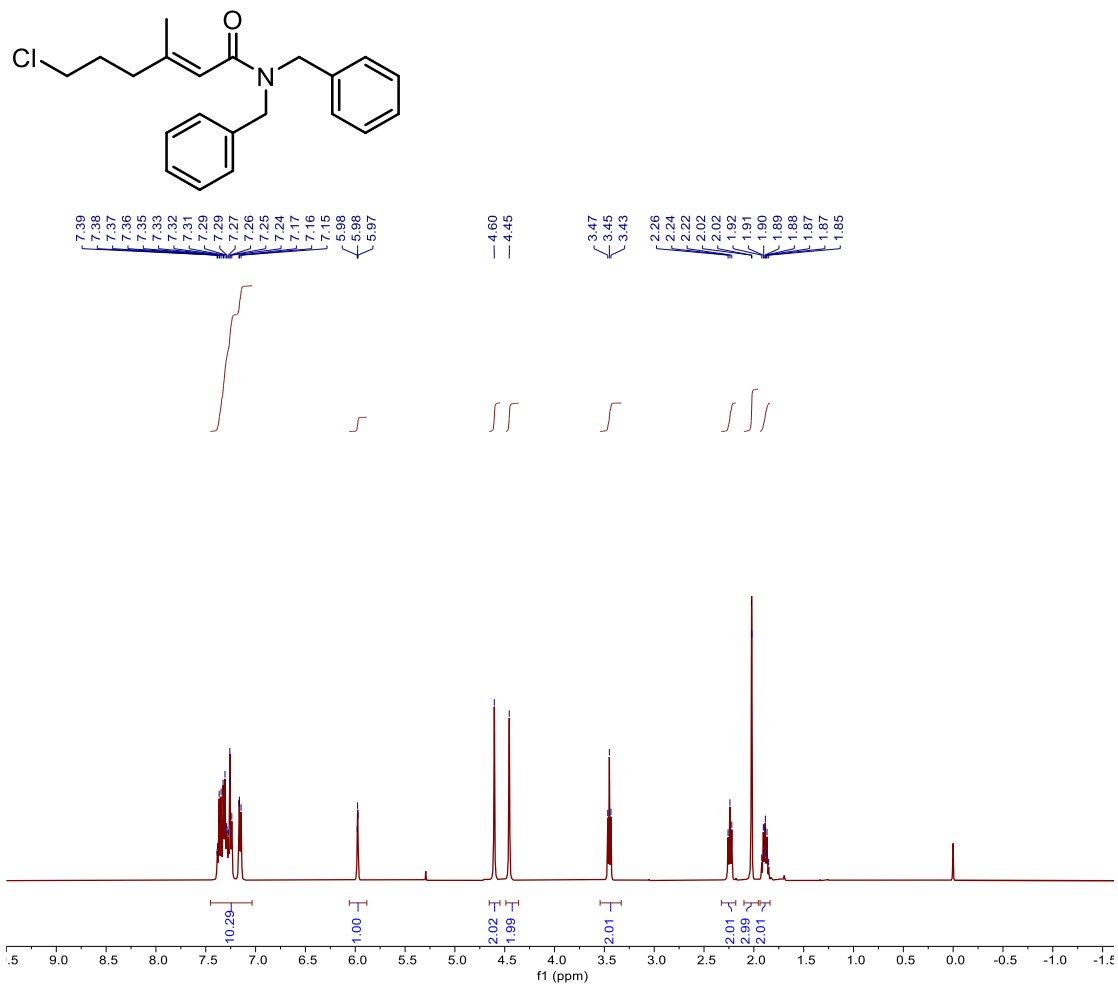

Supplementary Figure 53.  $^1\text{H}$  NMR (400 MHz,  $\text{CDCl}_3$ ) of **1x**.

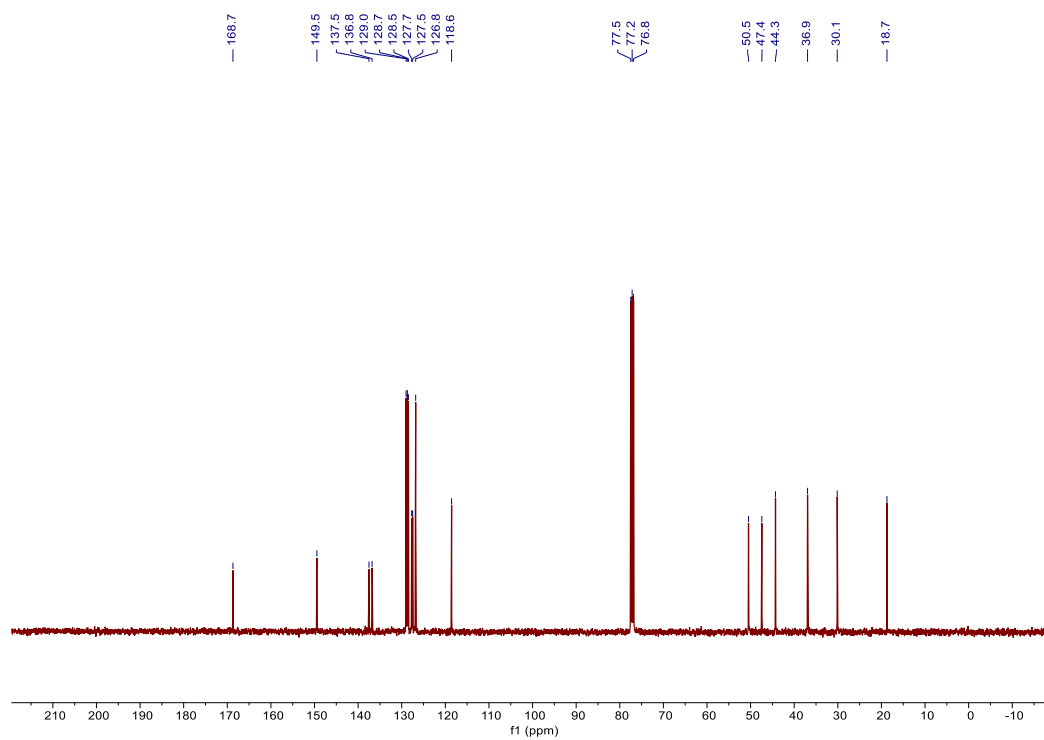

Supplementary Figure 54.  $^{13}\text{C}$  NMR (101 MHz,  $\text{CDCl}_3$ ) of **1x**.

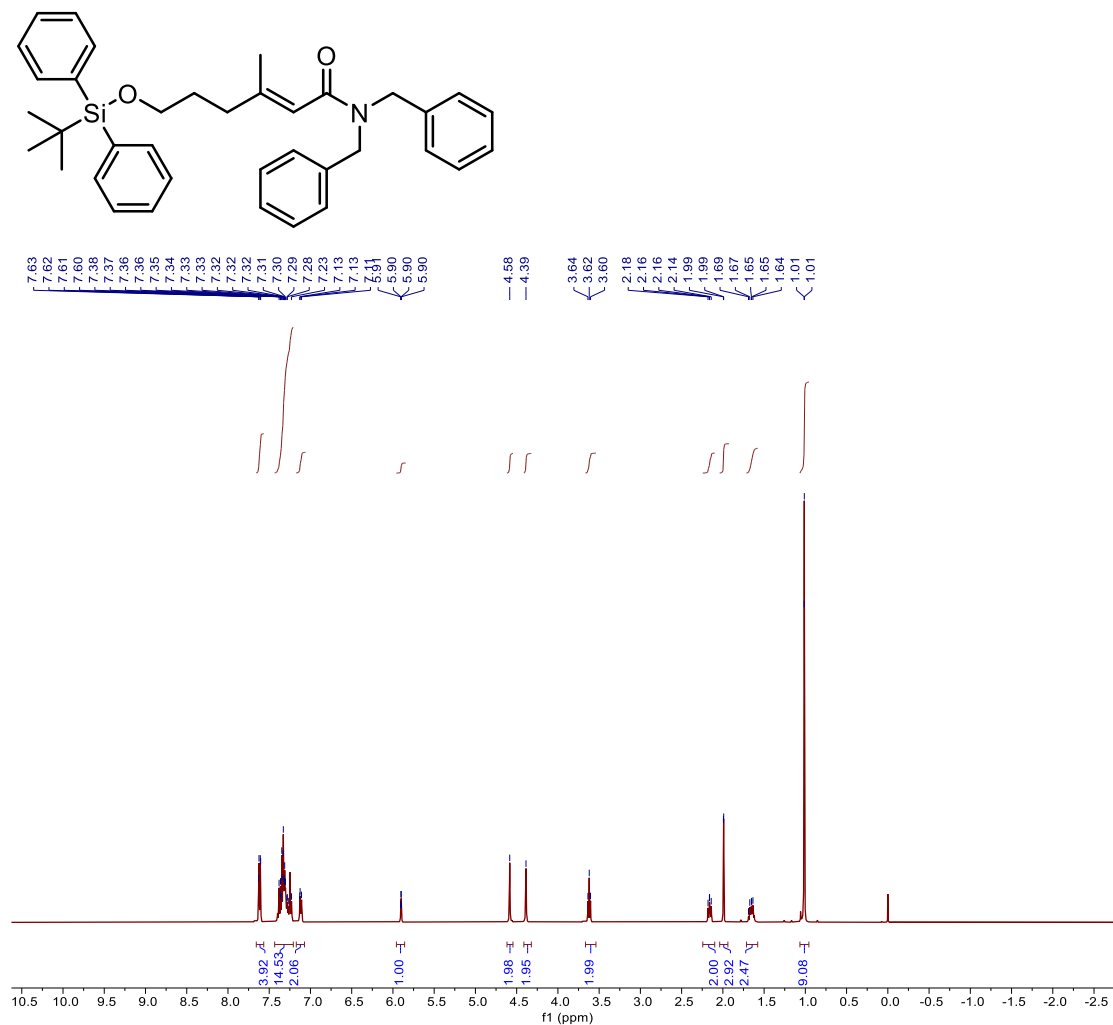

Supplementary Figure 55. <sup>1</sup>H NMR (400 MHz, CDCl<sub>3</sub>) of **1y**.

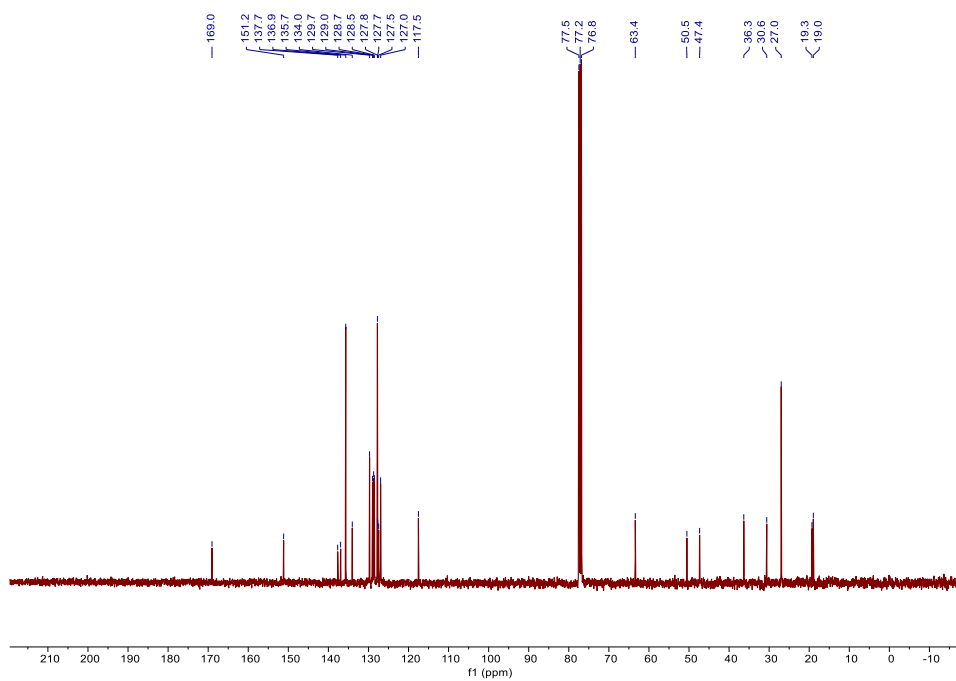

Supplementary Figure 56. <sup>13</sup>C NMR (101 MHz, CDCl<sub>3</sub>) of **1y**.

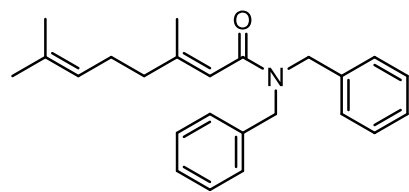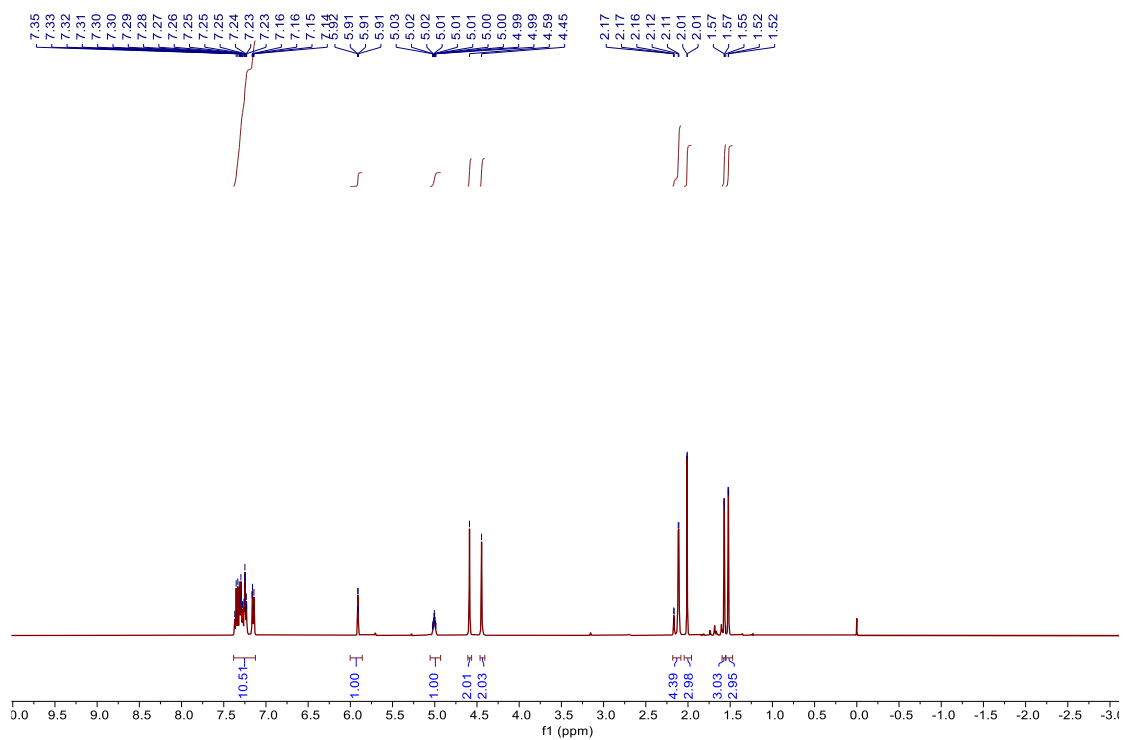

Supplementary Figure 57. <sup>1</sup>H NMR (400 MHz, CDCl<sub>3</sub>) of **1z**.

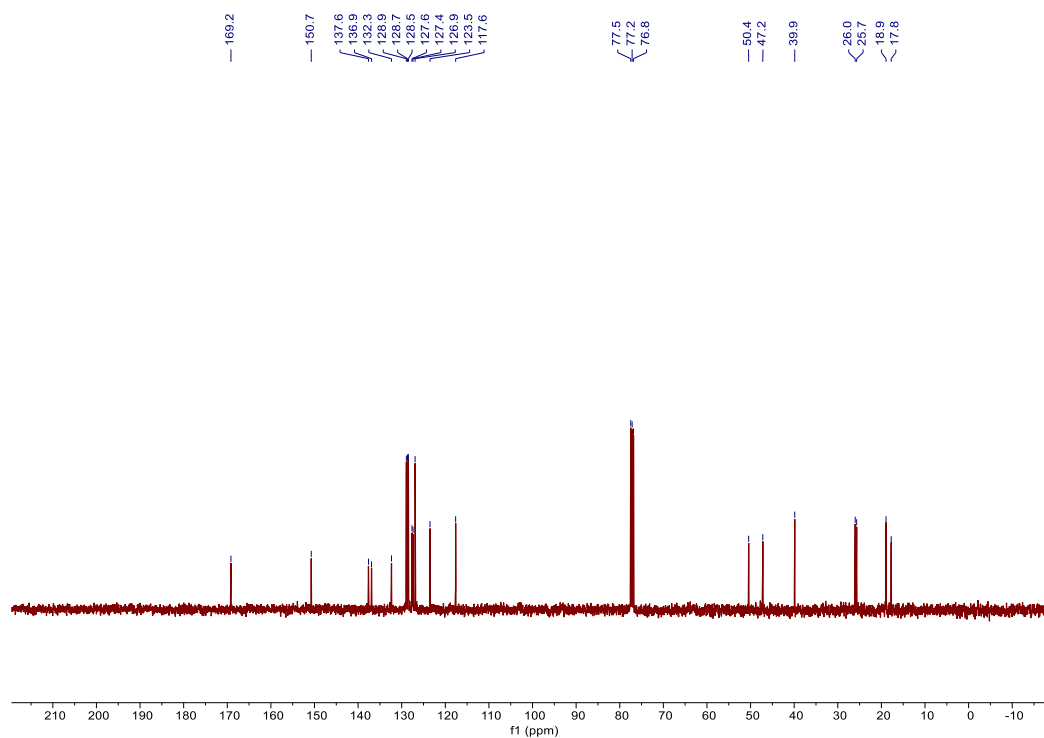

Supplementary Figure 58. <sup>13</sup>C NMR (101 MHz, CDCl<sub>3</sub>) of **1z**.

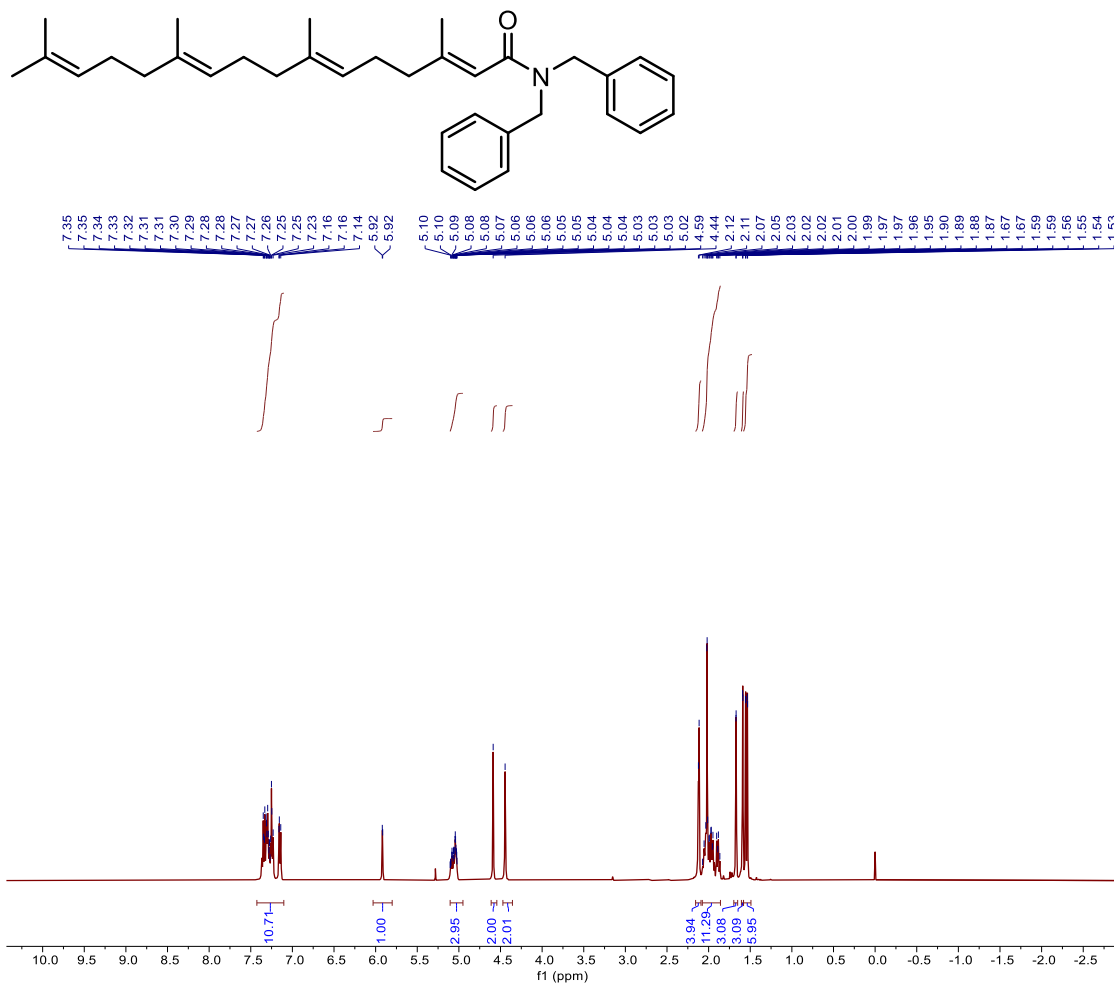

Supplementary Figure 59. <sup>1</sup>H NMR (400 MHz, CDCl<sub>3</sub>) of **1aa**.

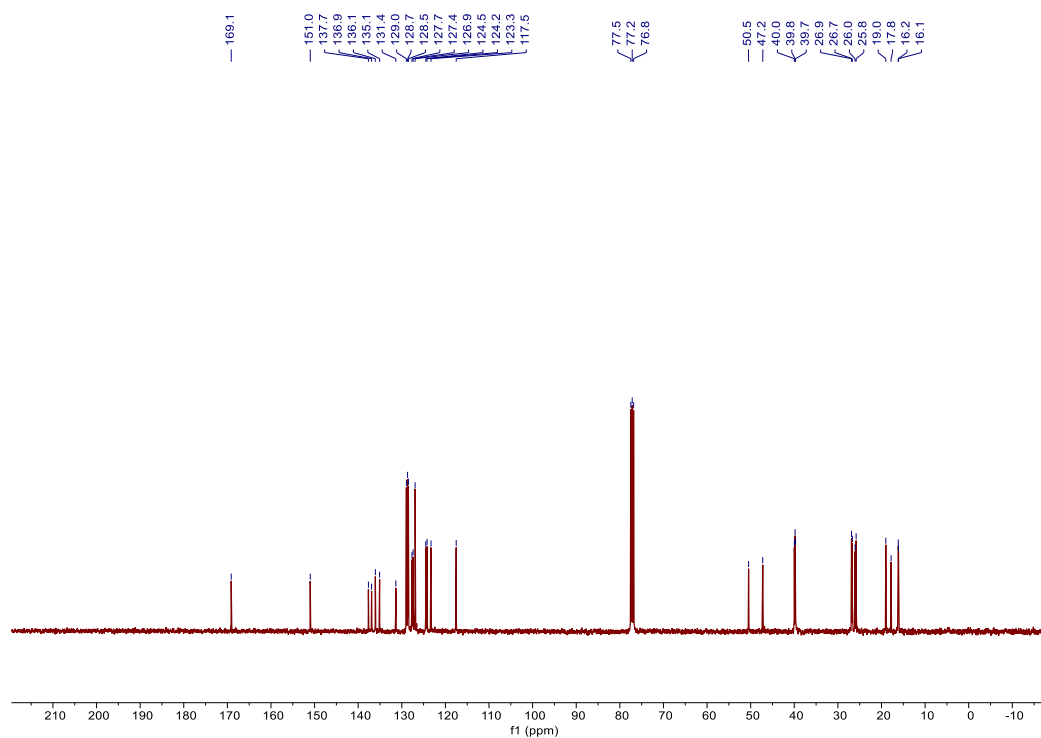

Supplementary Figure 60. <sup>13</sup>C NMR (101 MHz, CDCl<sub>3</sub>) of **1aa**.

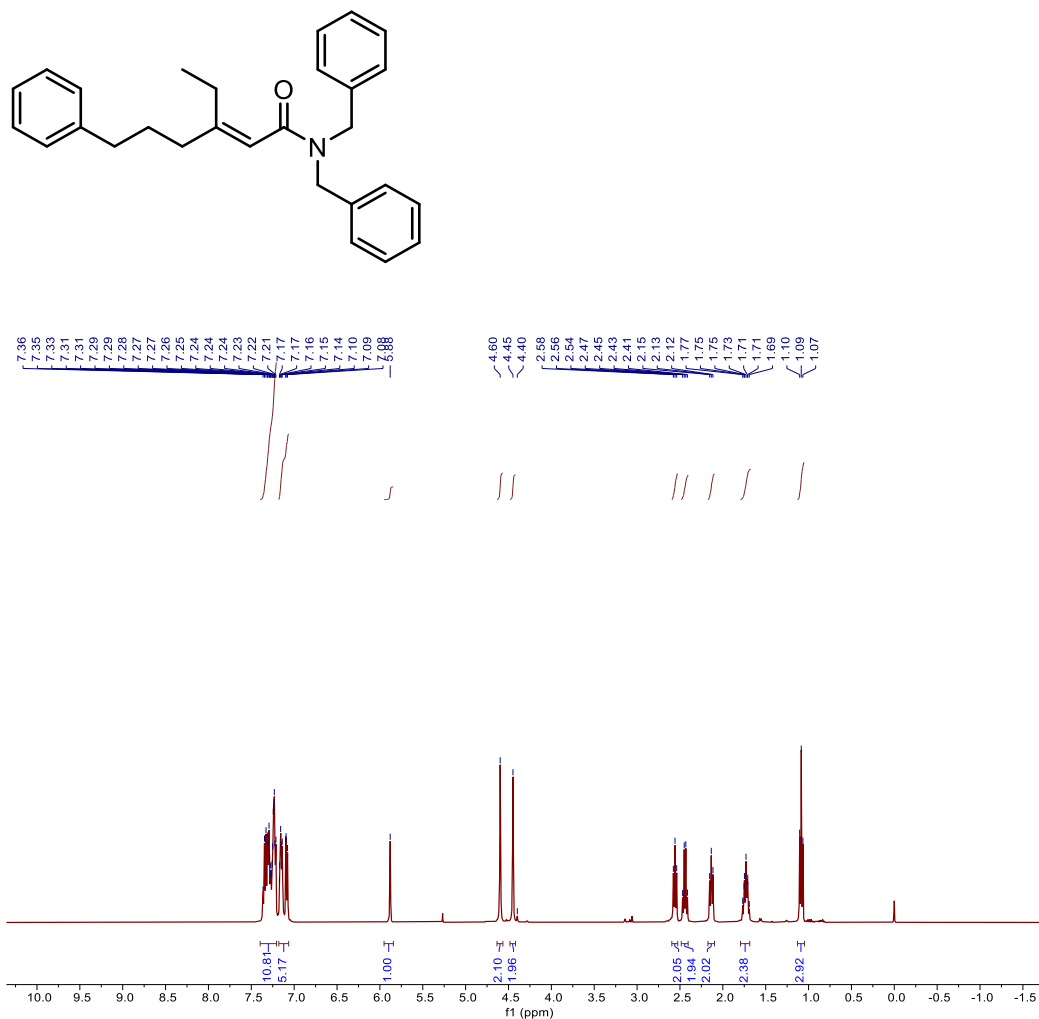

Supplementary Figure 61. <sup>1</sup>H NMR (400 MHz, CDCl<sub>3</sub>) of **1ab**.

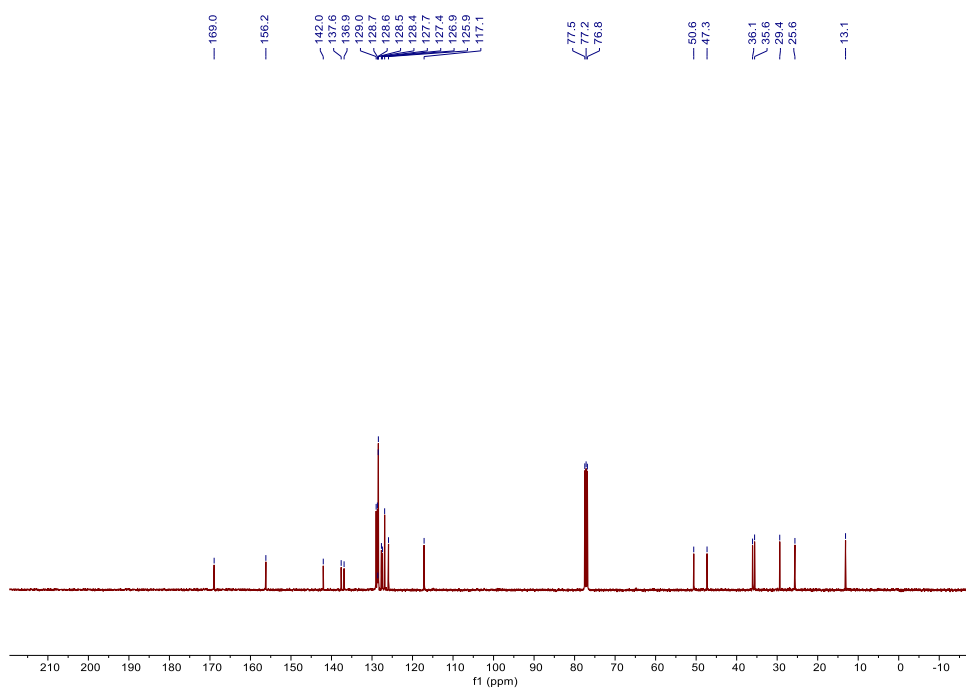

Supplementary Figure 62. <sup>13</sup>C NMR (101 MHz, CDCl<sub>3</sub>) of **1ab**.



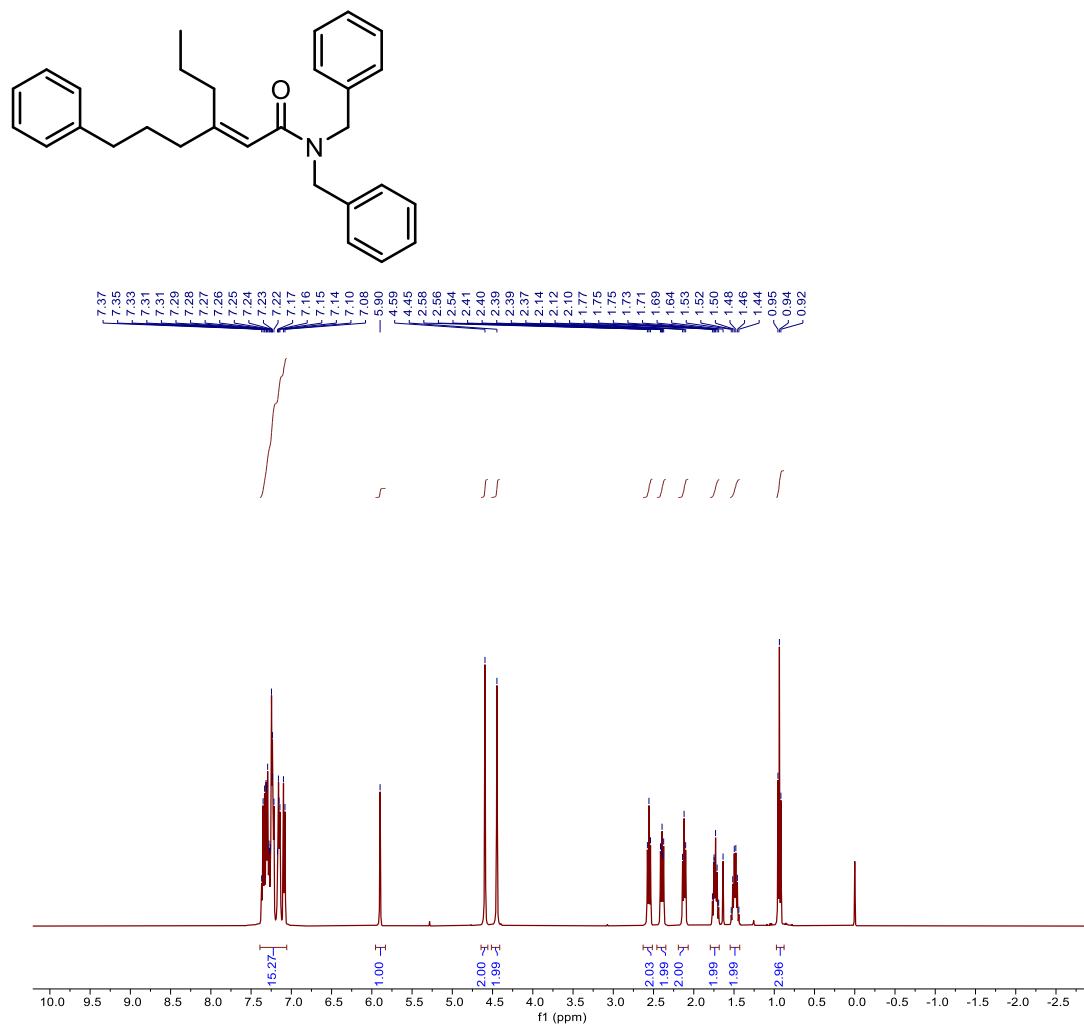

Supplementary Figure 63. <sup>1</sup>H NMR (400 MHz, CDCl<sub>3</sub>) of **1ac**.

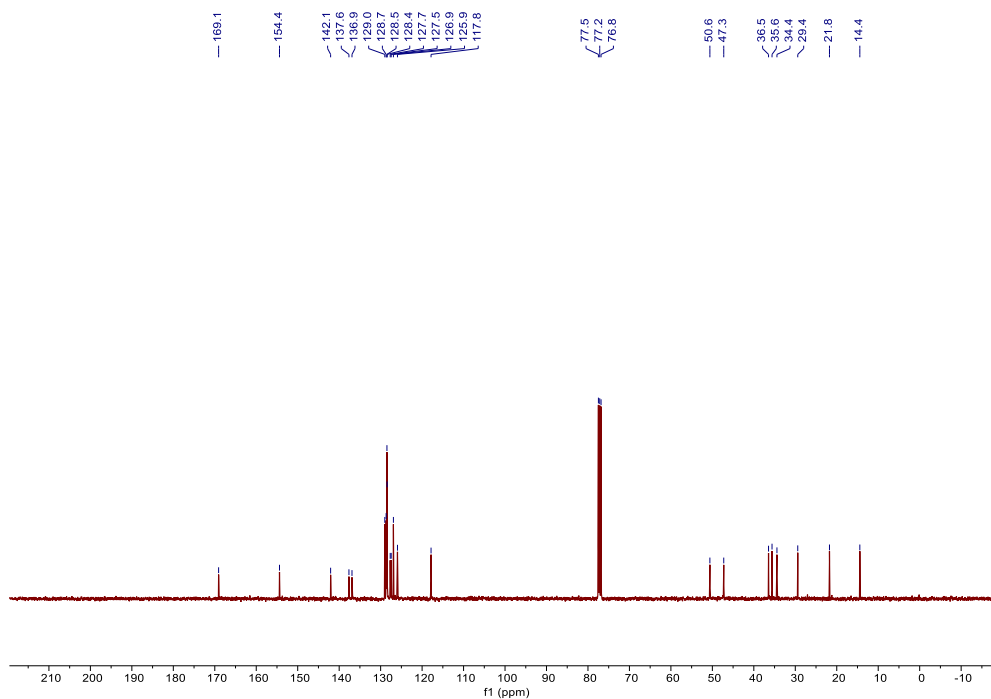

Supplementary Figure 64. <sup>13</sup>C NMR (101 MHz, CDCl<sub>3</sub>) of **1ac**.

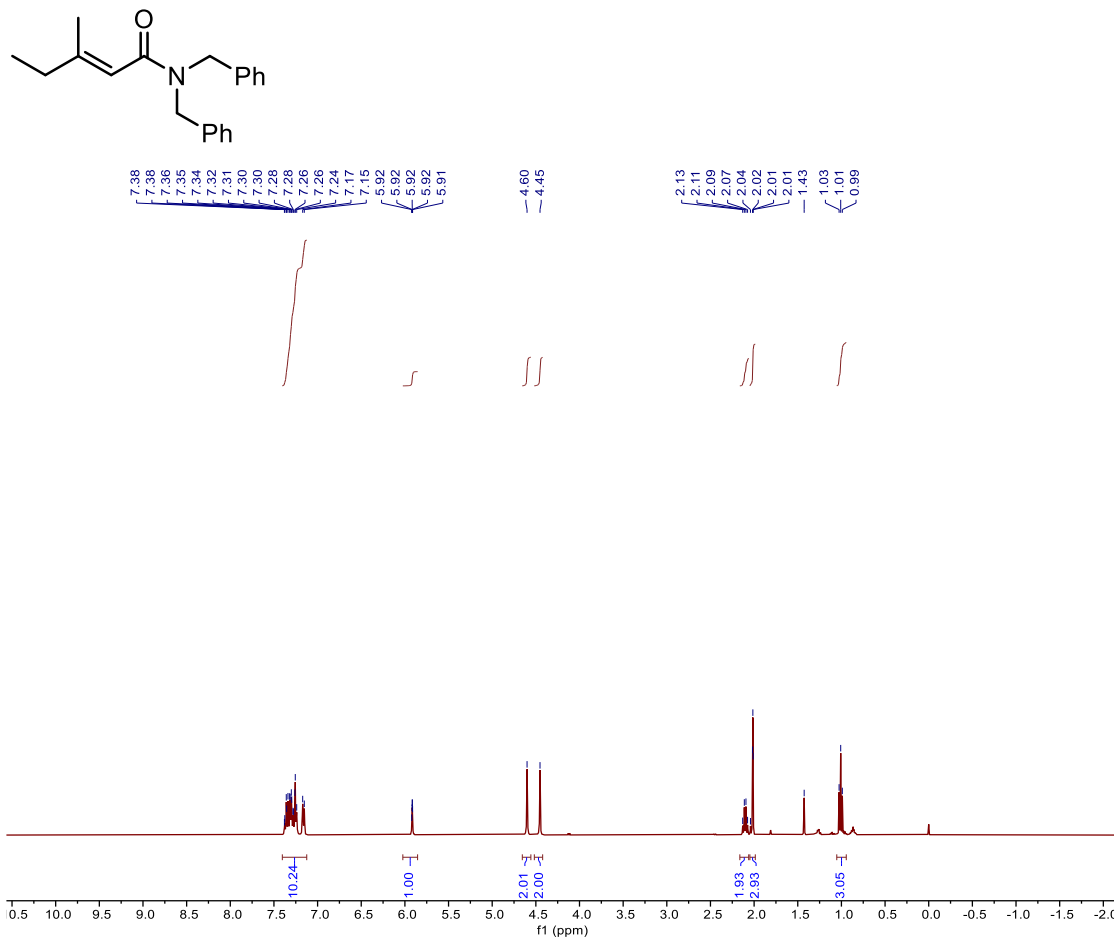

Supplementary Figure 65. <sup>1</sup>H NMR (400 MHz, CDCl<sub>3</sub>) of **1ad**.

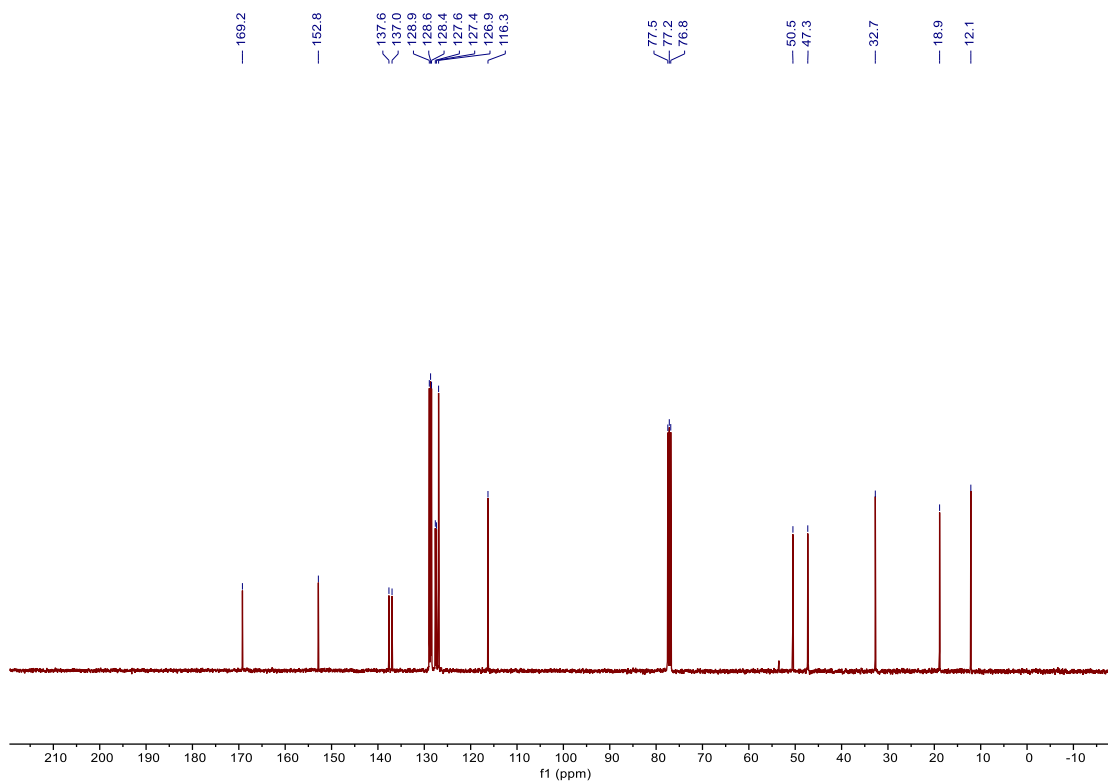

Supplementary Figure 66. <sup>13</sup>C NMR (101 MHz, CDCl<sub>3</sub>) of **1ad**.

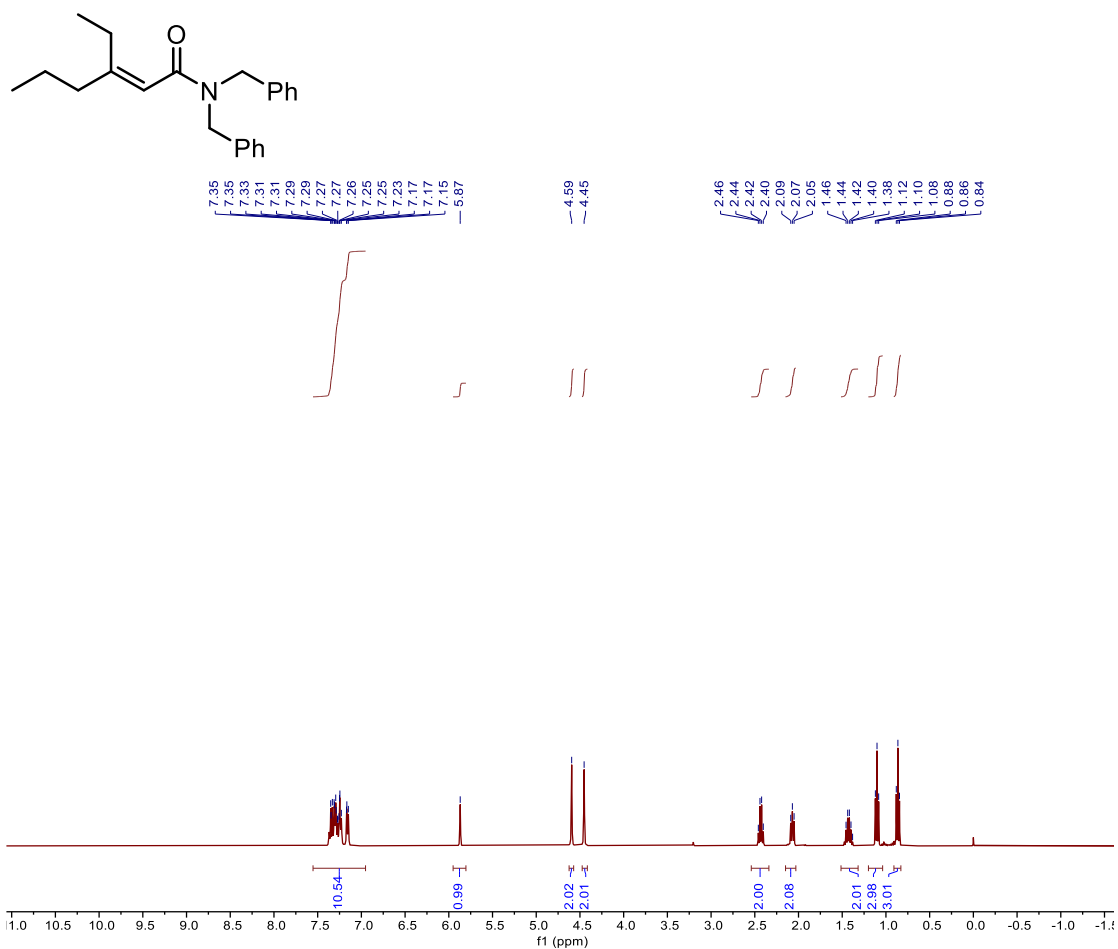

Supplementary Figure 67.  $^1\text{H}$  NMR (400 MHz,  $\text{CDCl}_3$ ) of **1ae**.

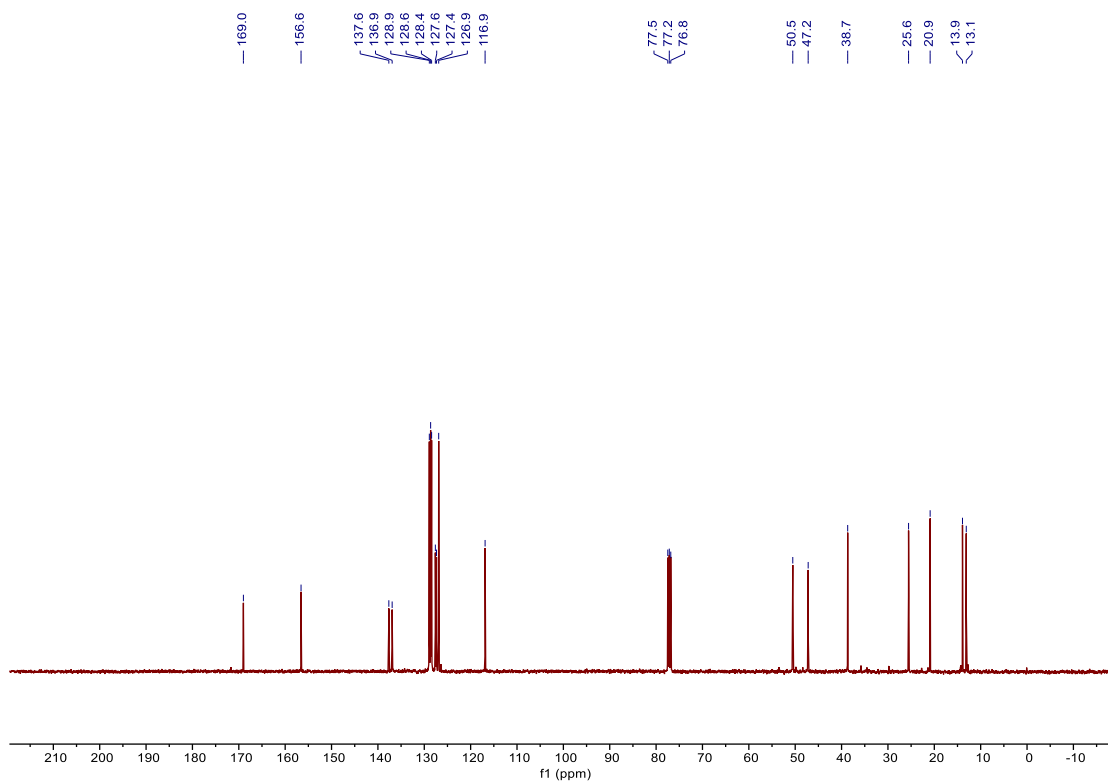

Supplementary Figure 68.  $^{13}\text{C}$  NMR (101 MHz,  $\text{CDCl}_3$ ) of **1ae**.

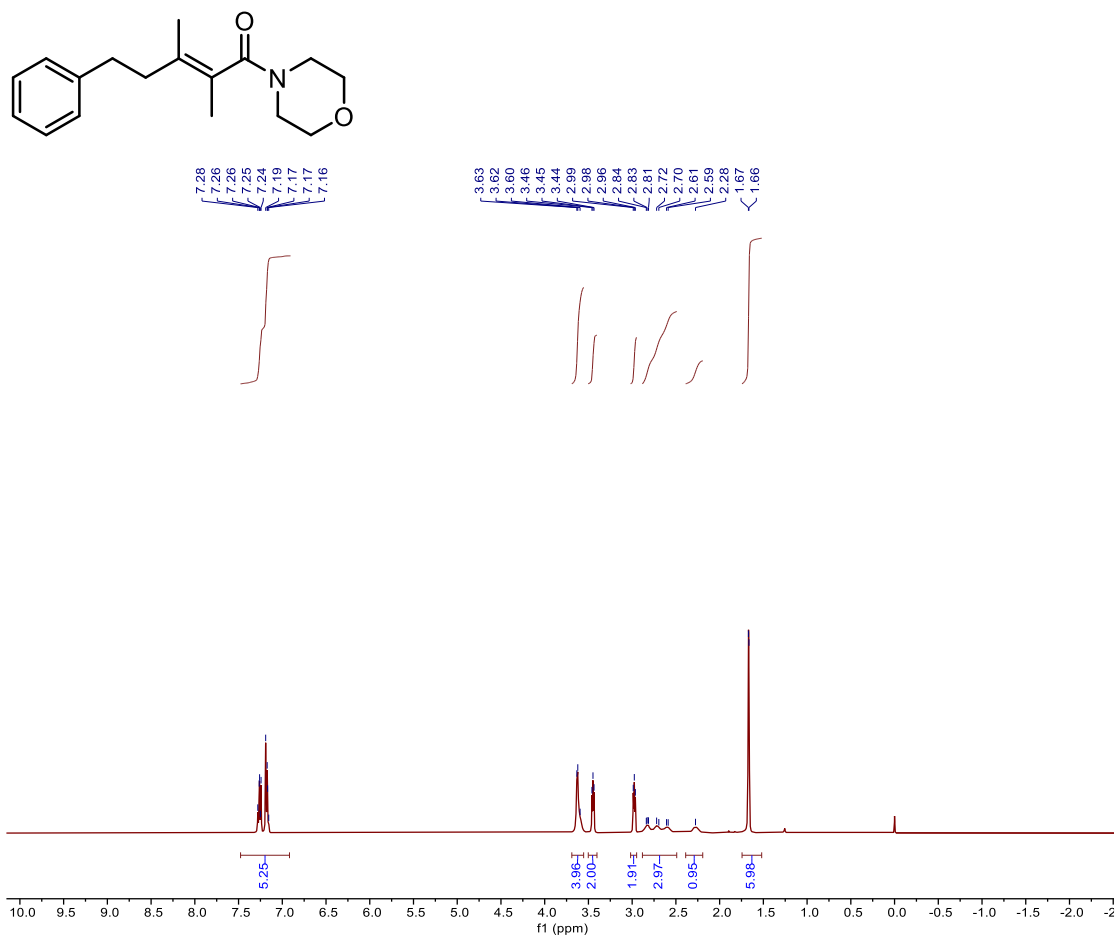

Supplementary Figure 69. <sup>1</sup>H NMR (400 MHz, CDCl<sub>3</sub>) of **1af**.

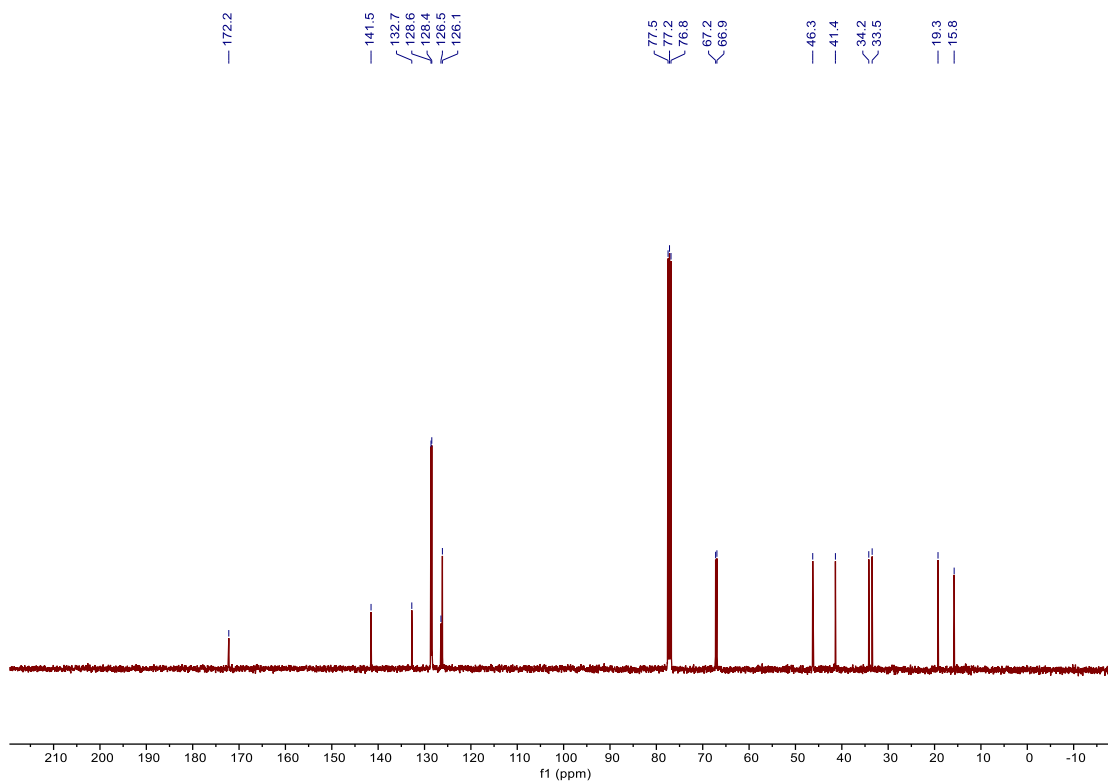

Supplementary Figure 70. <sup>13</sup>C NMR (101 MHz, CDCl<sub>3</sub>) of **1af**.

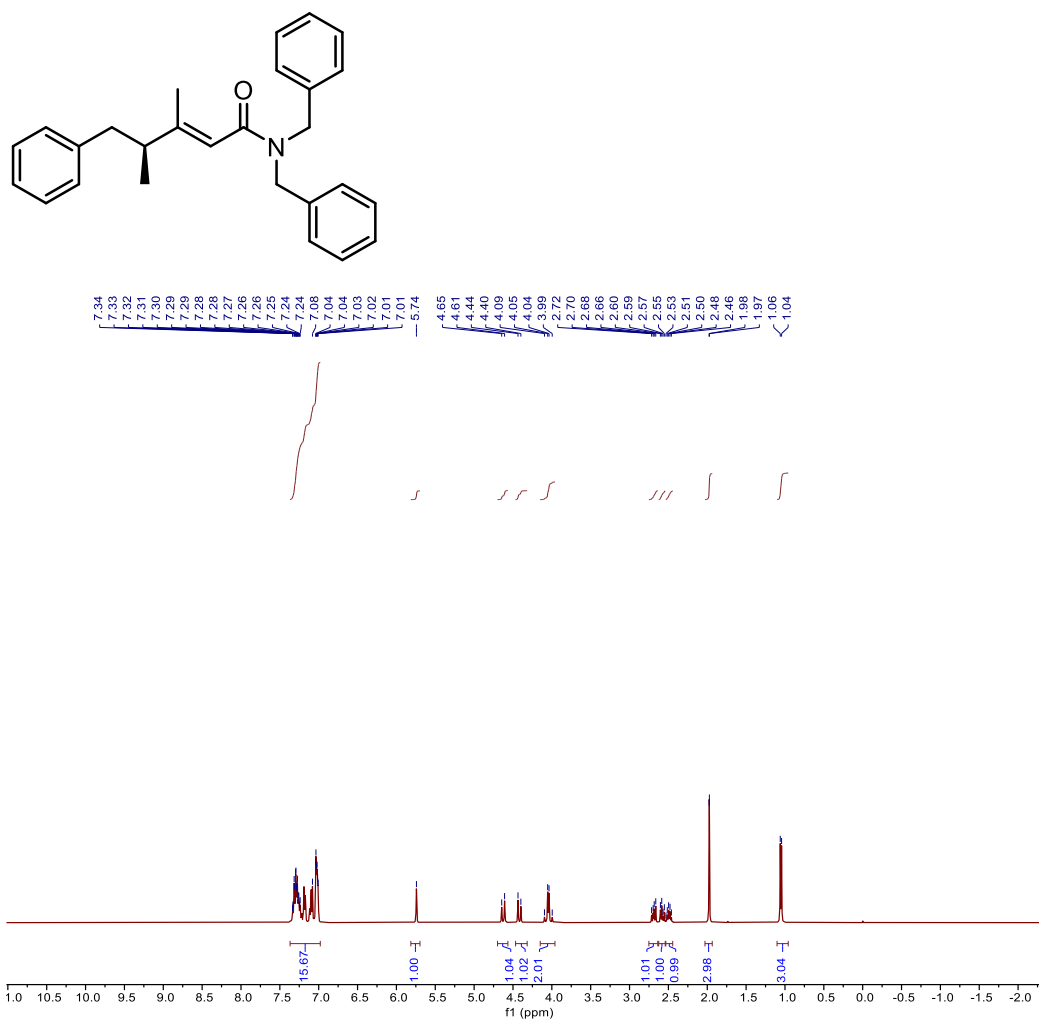

Supplementary Figure 71.  $^1\text{H}$  NMR (400 MHz,  $\text{CDCl}_3$ ) of **1ag**.

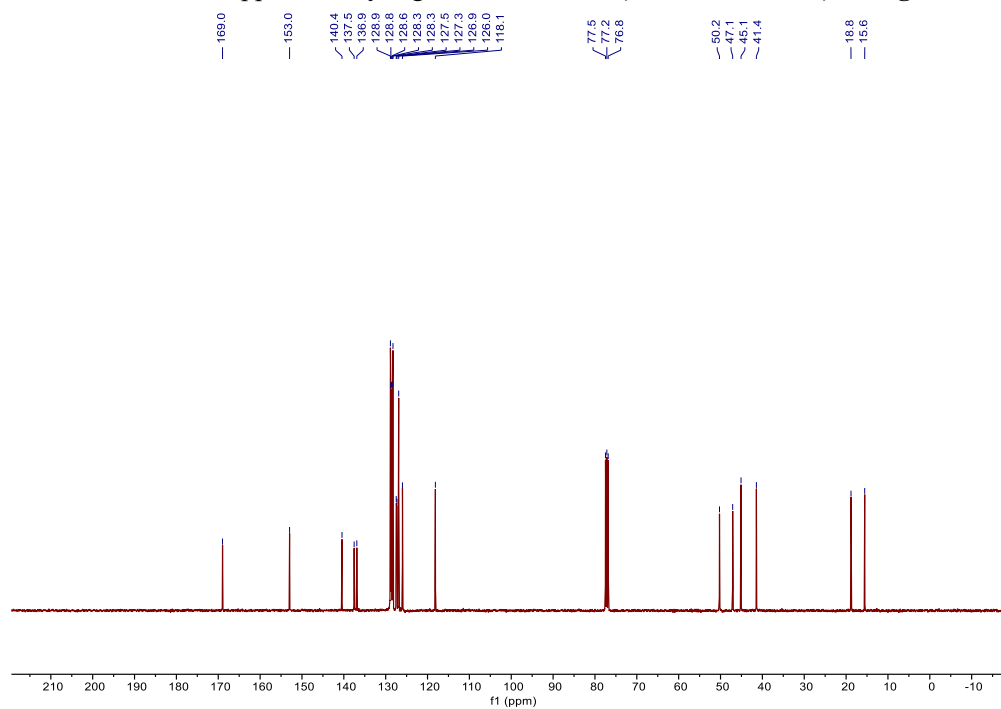

Supplementary Figure 72.  $^{13}\text{C}$  NMR (101 MHz,  $\text{CDCl}_3$ ) of **1ag**.

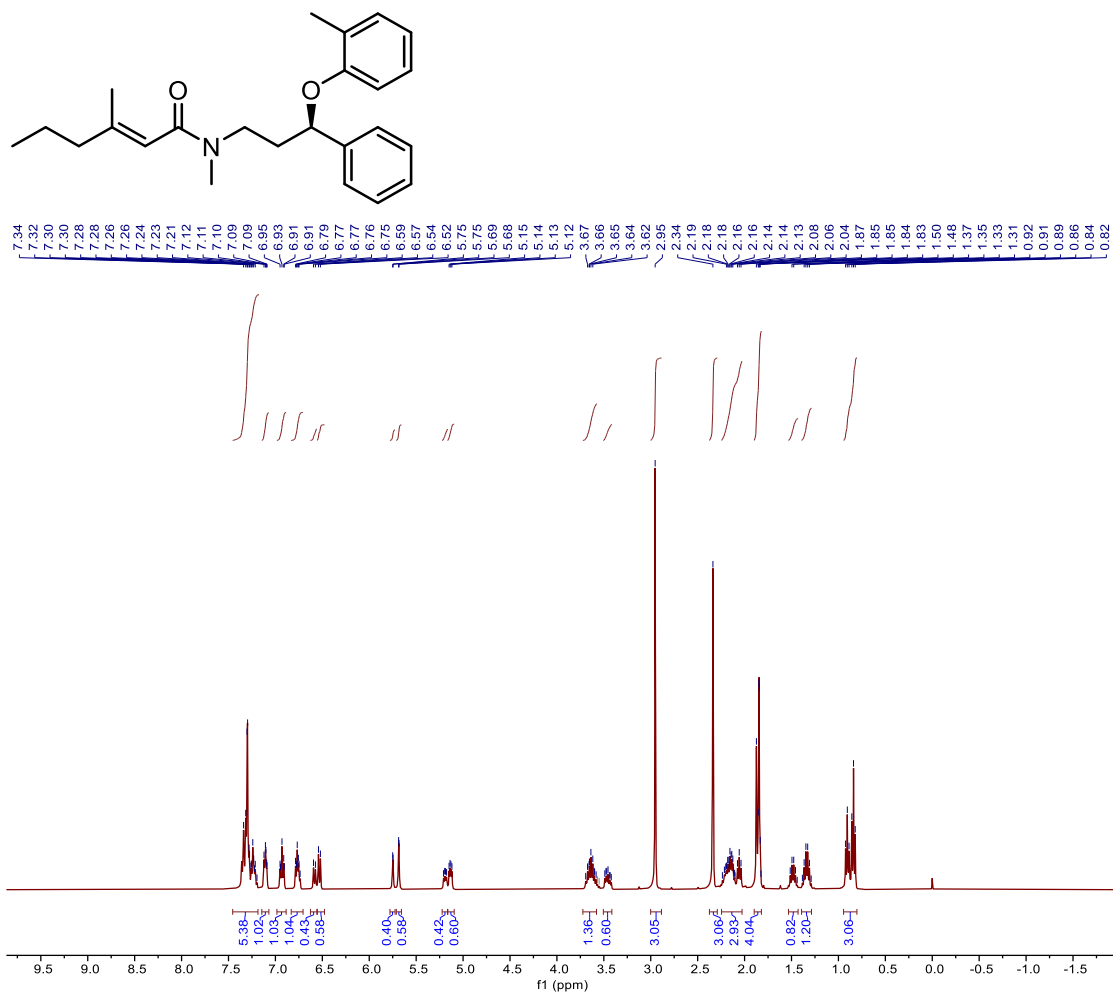

Supplementary Figure 73. <sup>1</sup>H NMR (400 MHz, CDCl<sub>3</sub>) of **1ah**.

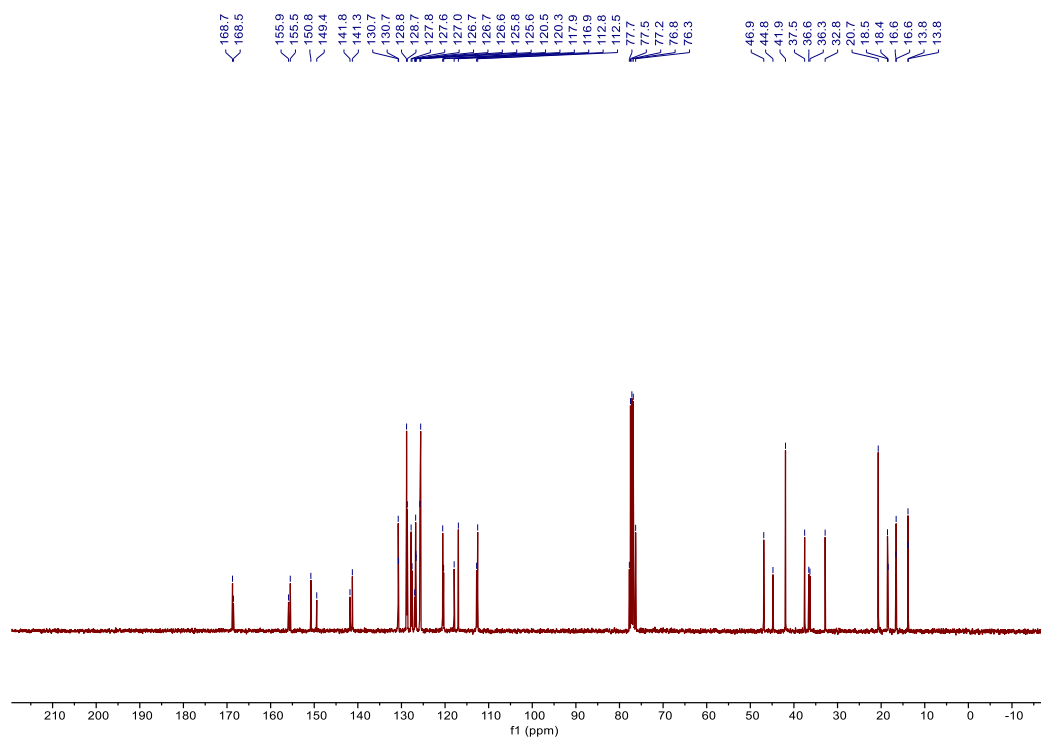

Supplementary Figure 74. <sup>13</sup>C NMR (101 MHz, CDCl<sub>3</sub>) of **1ah**.

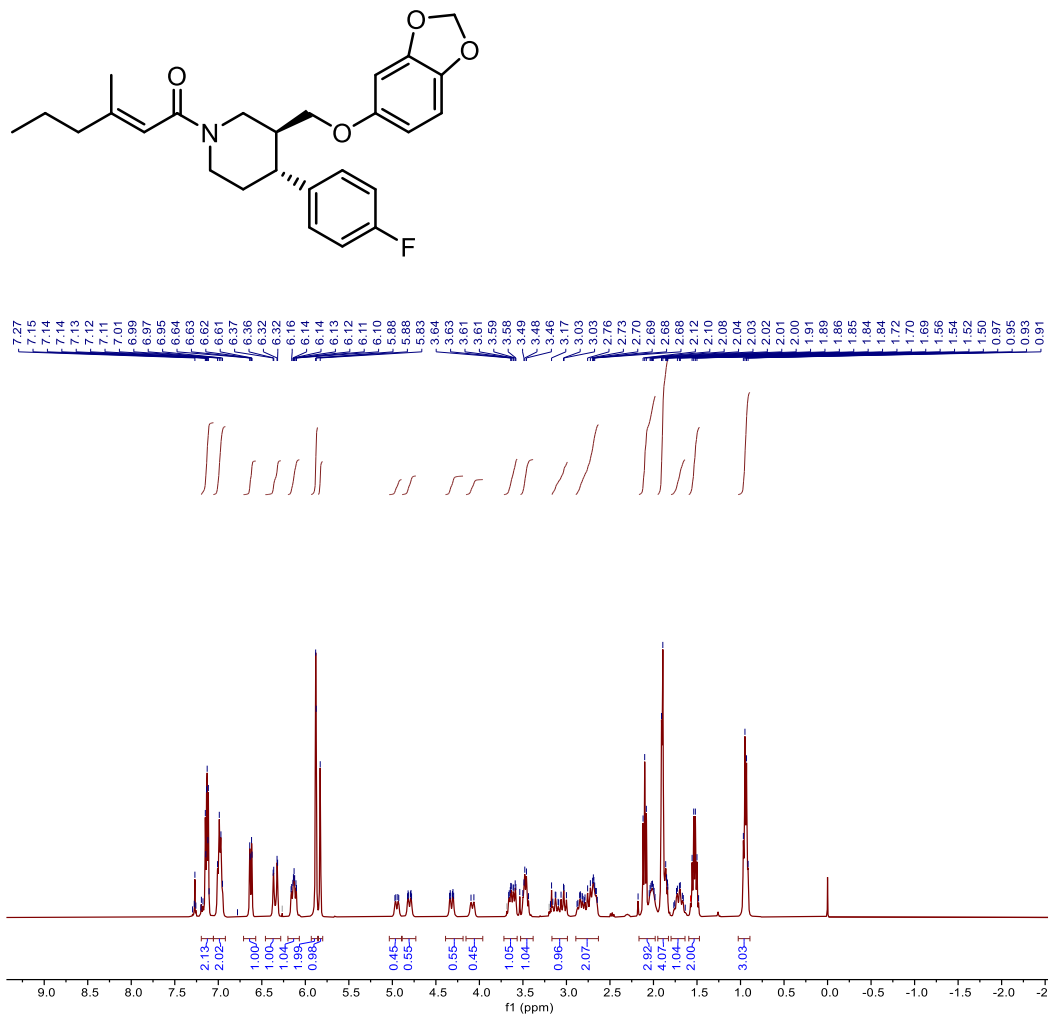

Supplementary Figure 75.  $^1\text{H}$  NMR (400 MHz,  $\text{CDCl}_3$ ) of **1ai**.

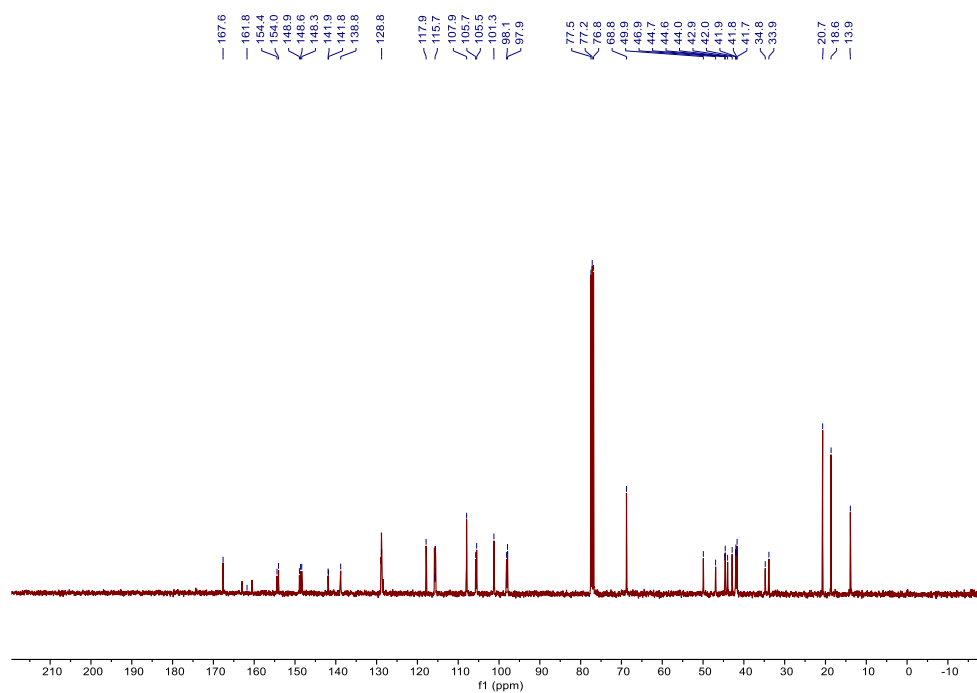

Supplementary Figure 76.  $^{13}\text{C}$  NMR (101 MHz,  $\text{CDCl}_3$ ) of **1ai**.

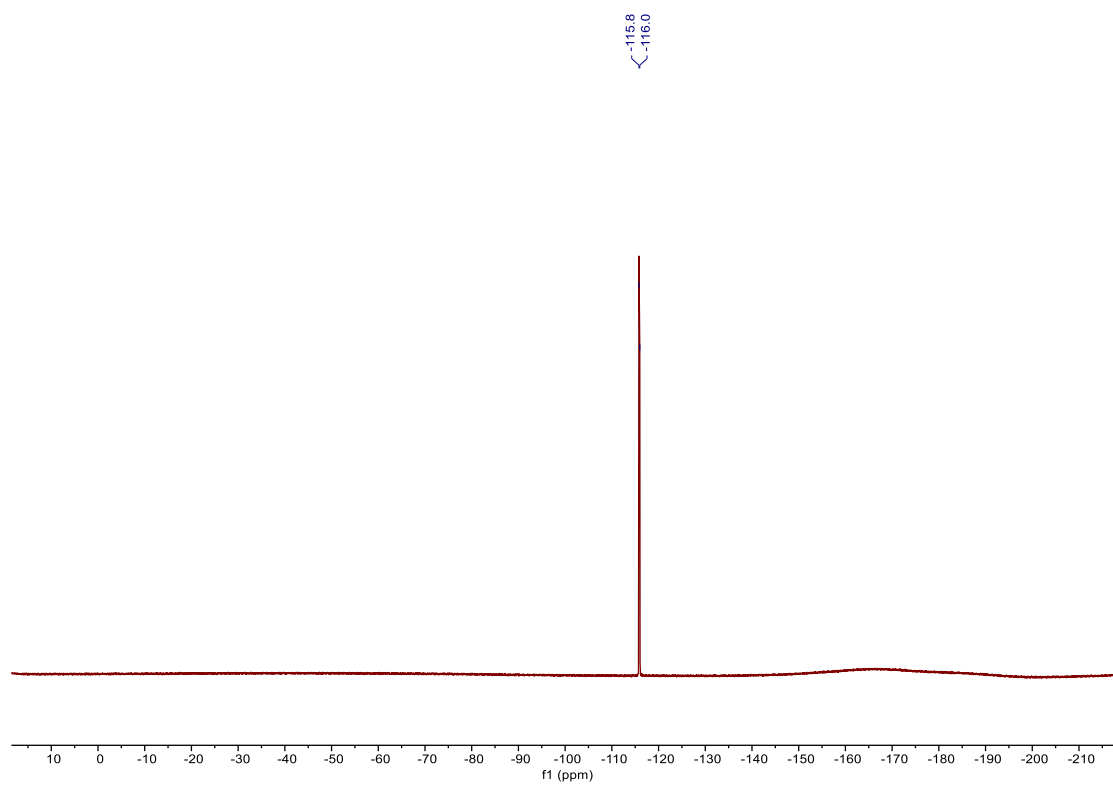

Supplementary Figure 77.  $^{19}\text{F}$  NMR (376 MHz,  $\text{CDCl}_3$ ) of **1ai**.



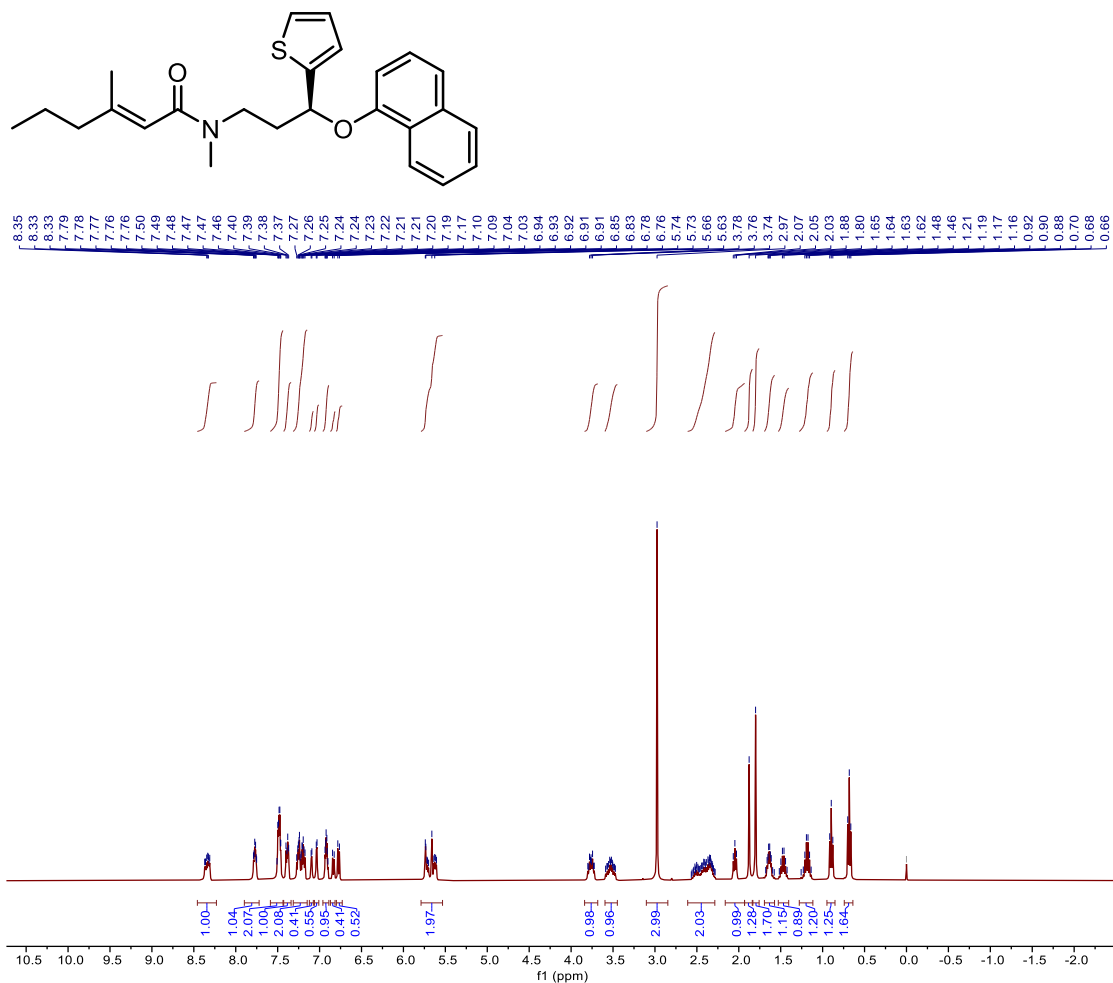

Supplementary Figure 78.  $^1\text{H}$  NMR (400 MHz,  $\text{CDCl}_3$ ) of **1aj**.

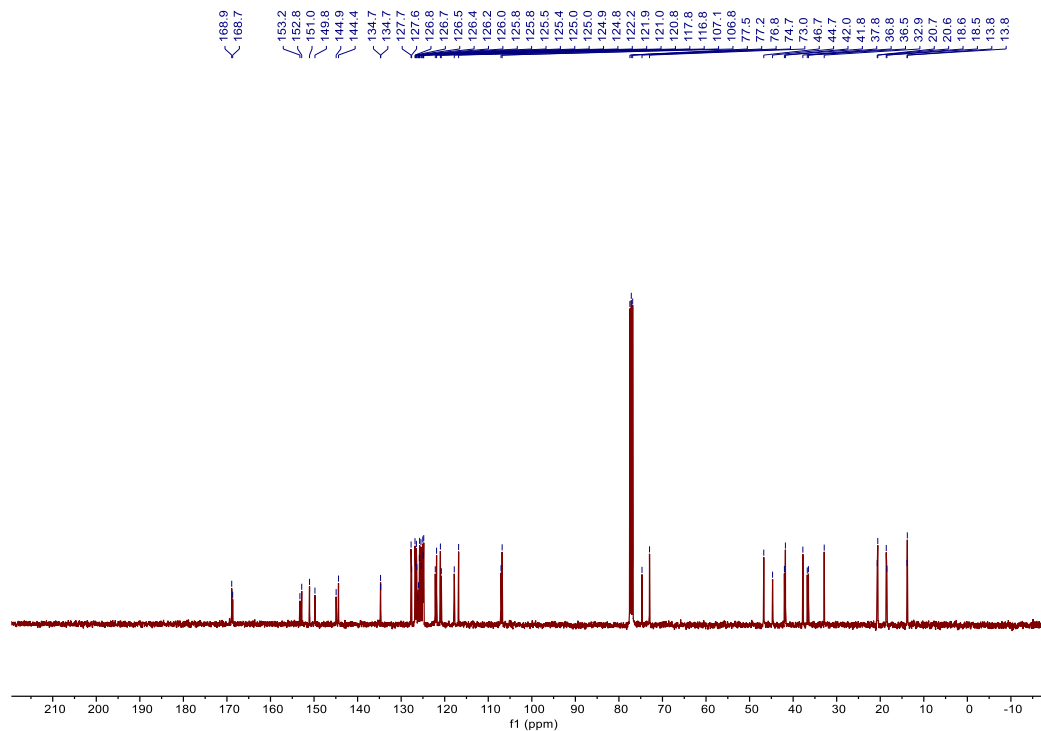

Supplementary Figure 79.  $^{13}\text{C}$  NMR (101 MHz,  $\text{CDCl}_3$ ) of **1aj**.

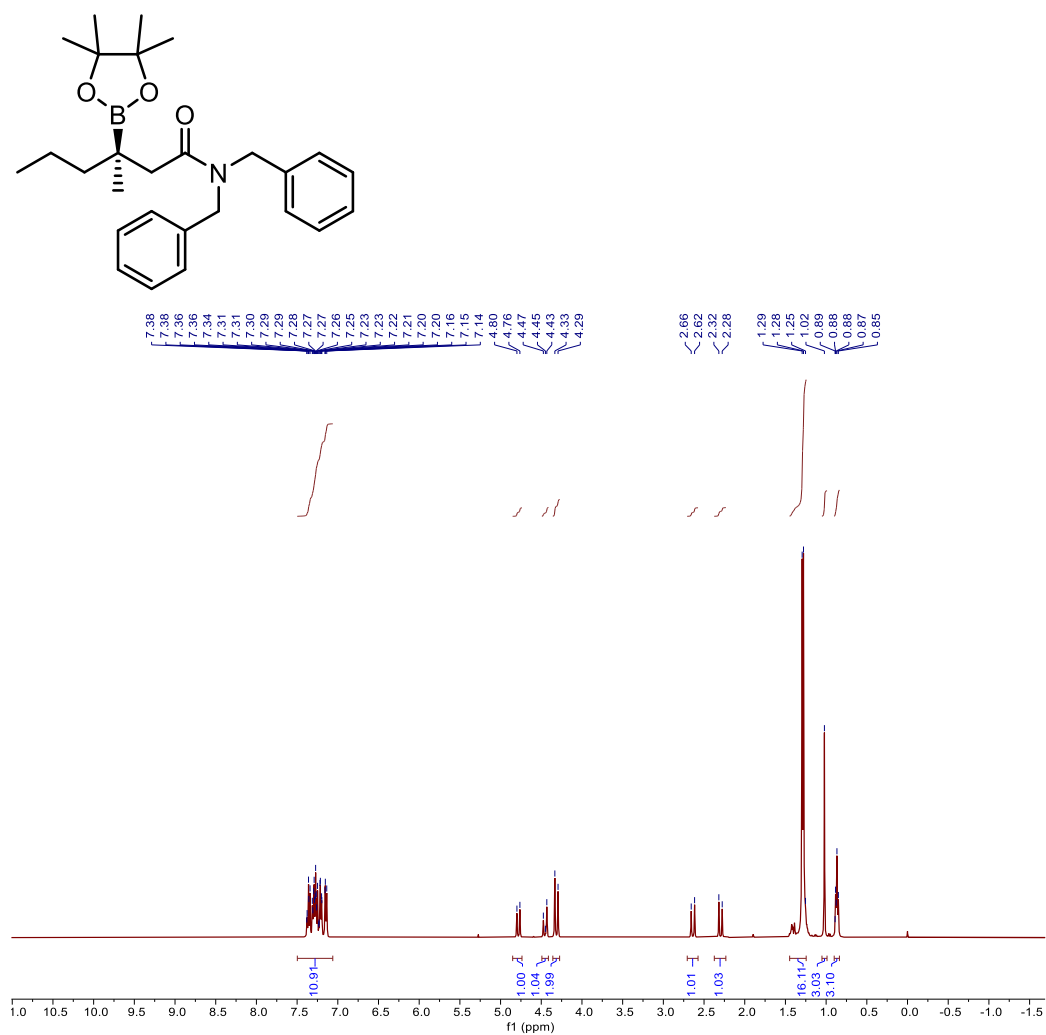

Supplementary Figure 80.  $^1\text{H}$  NMR (400 MHz,  $\text{CDCl}_3$ ) of **3a**.

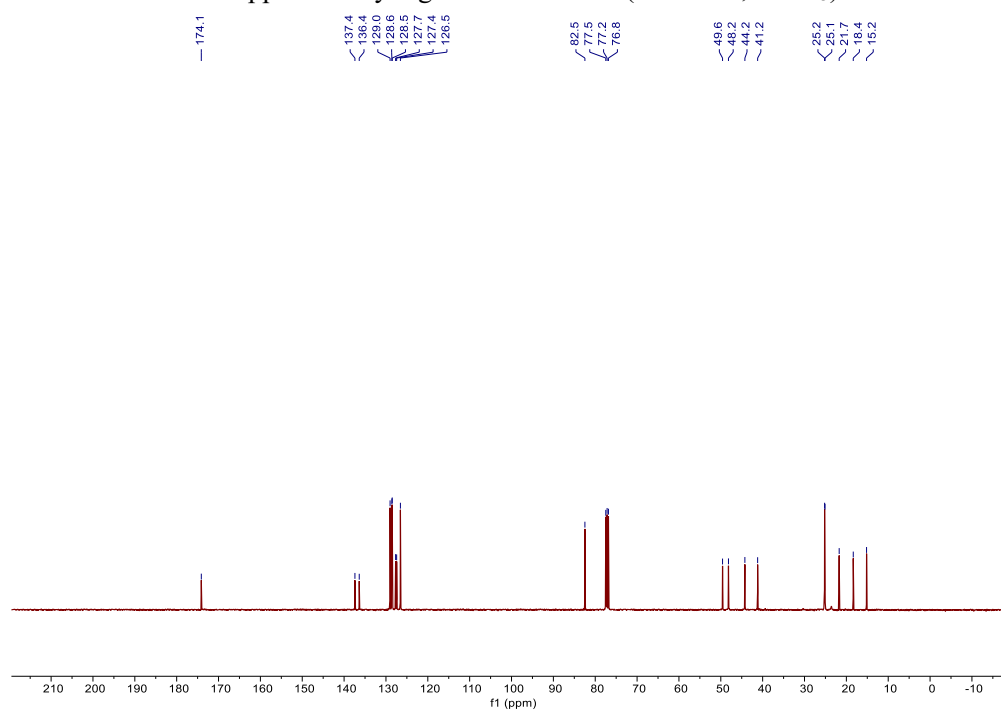

Supplementary Figure 81.  $^{13}\text{C}$  NMR (101 MHz,  $\text{CDCl}_3$ ) of **3a**.

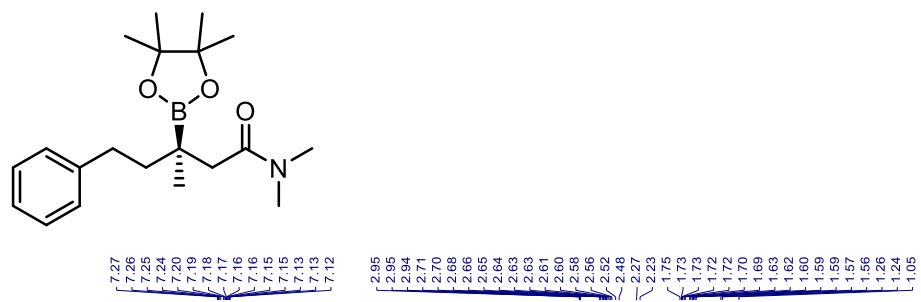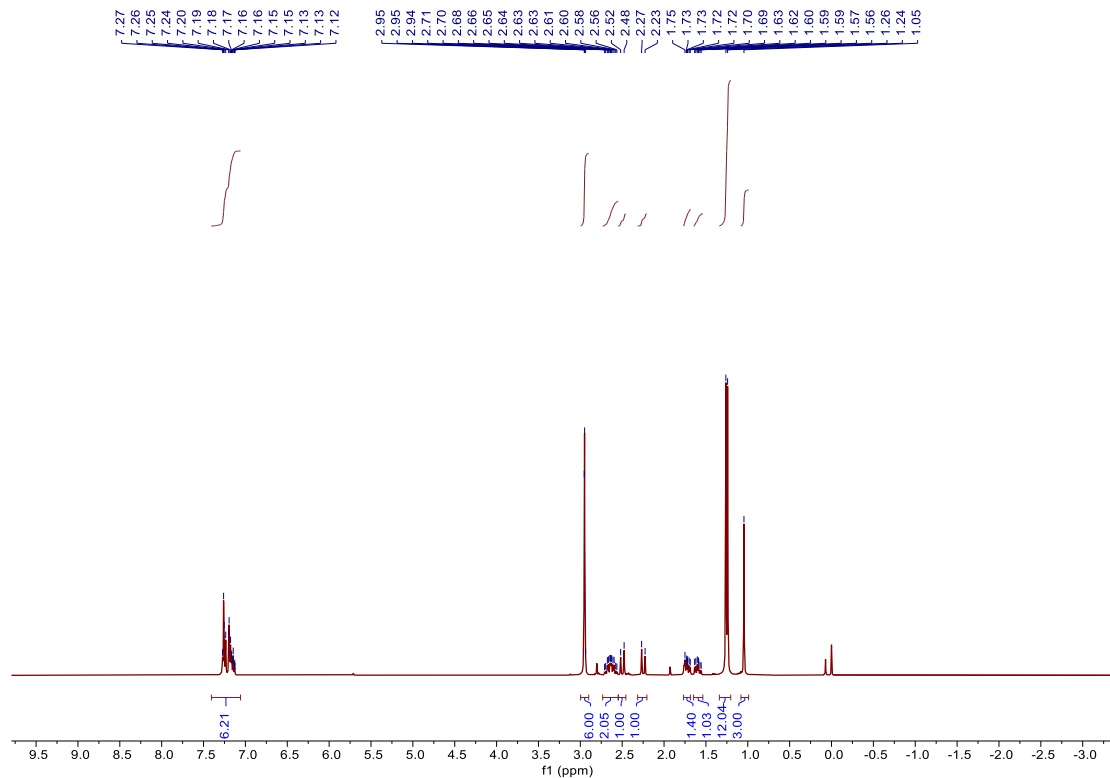

Supplementary Figure 82.  $^1\text{H NMR}$  (400 MHz,  $\text{CDCl}_3$ ) of **3b**.

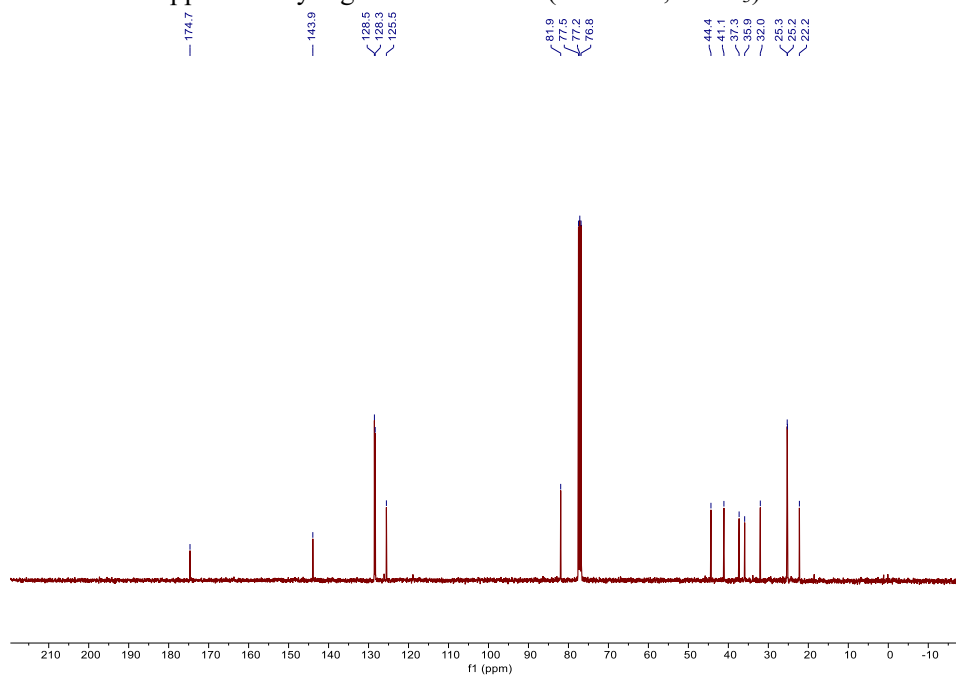

Supplementary Figure 83.  $^{13}\text{C NMR}$  (101 MHz,  $\text{CDCl}_3$ ) of **3b**.

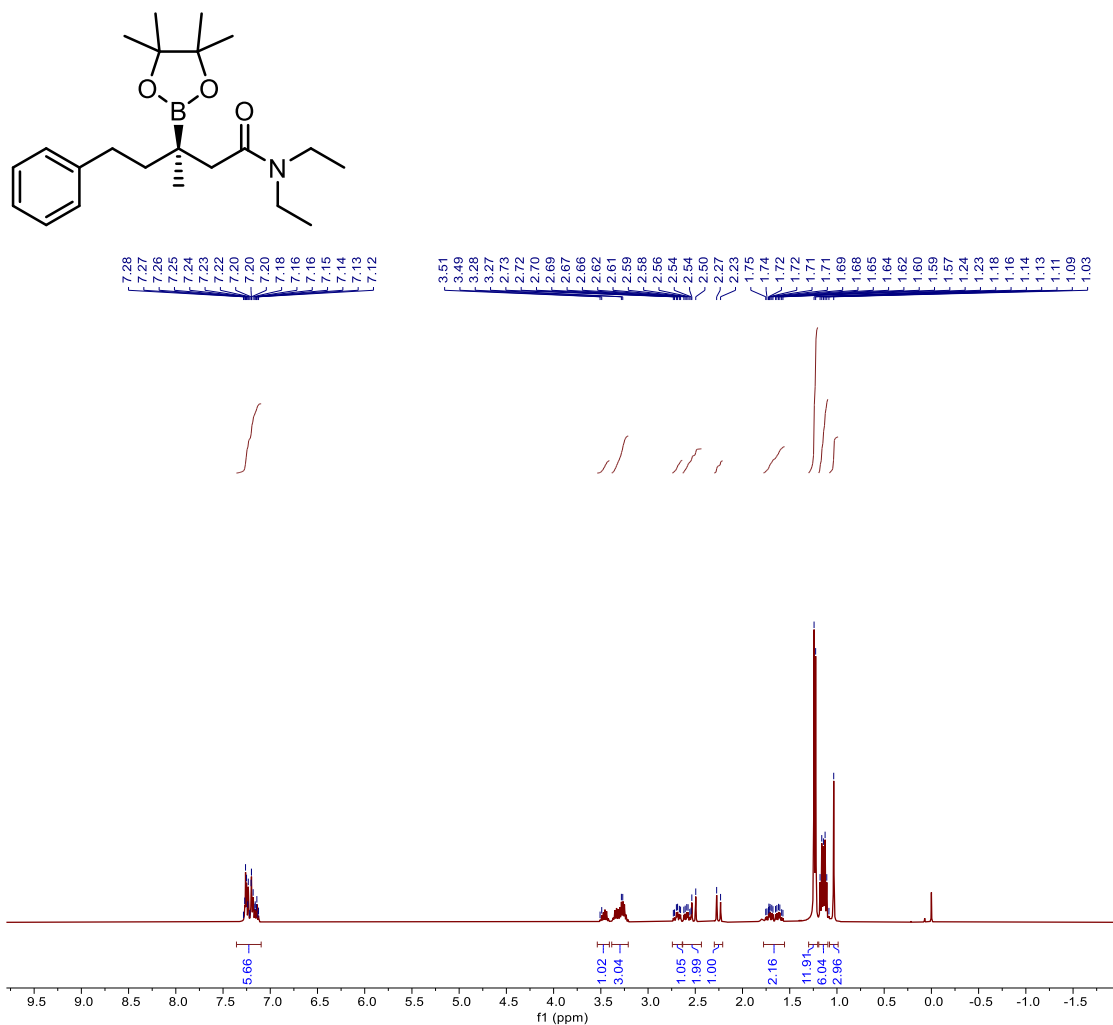

Supplementary Figure 84.  $^1\text{H}$  NMR (400 MHz,  $\text{CDCl}_3$ ) of **3c**.

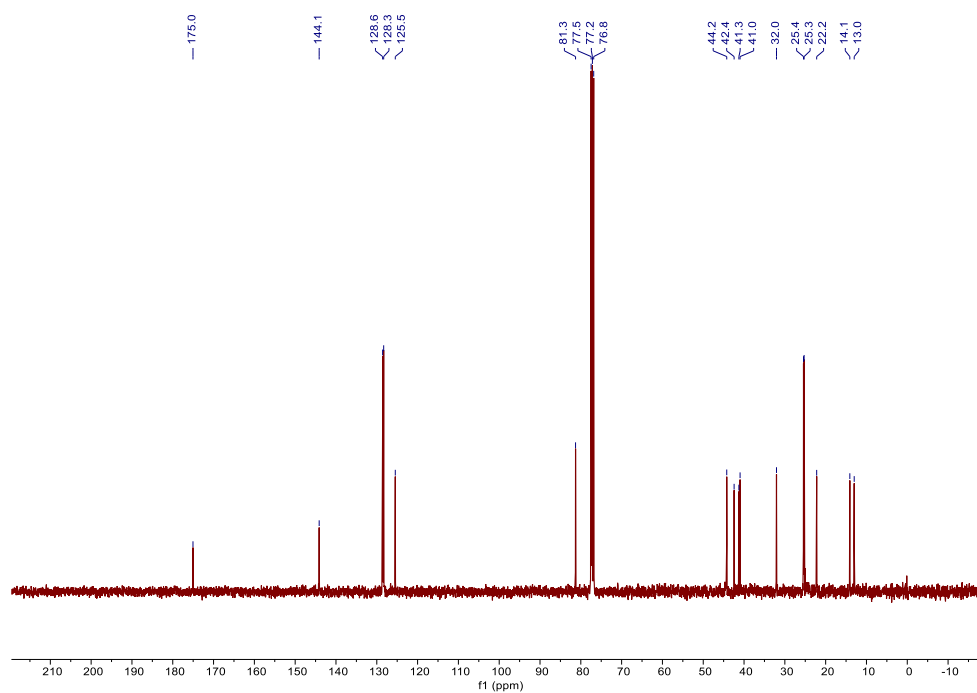

Supplementary Figure 85.  $^{13}\text{C}$  NMR (101 MHz,  $\text{CDCl}_3$ ) of **3c**.

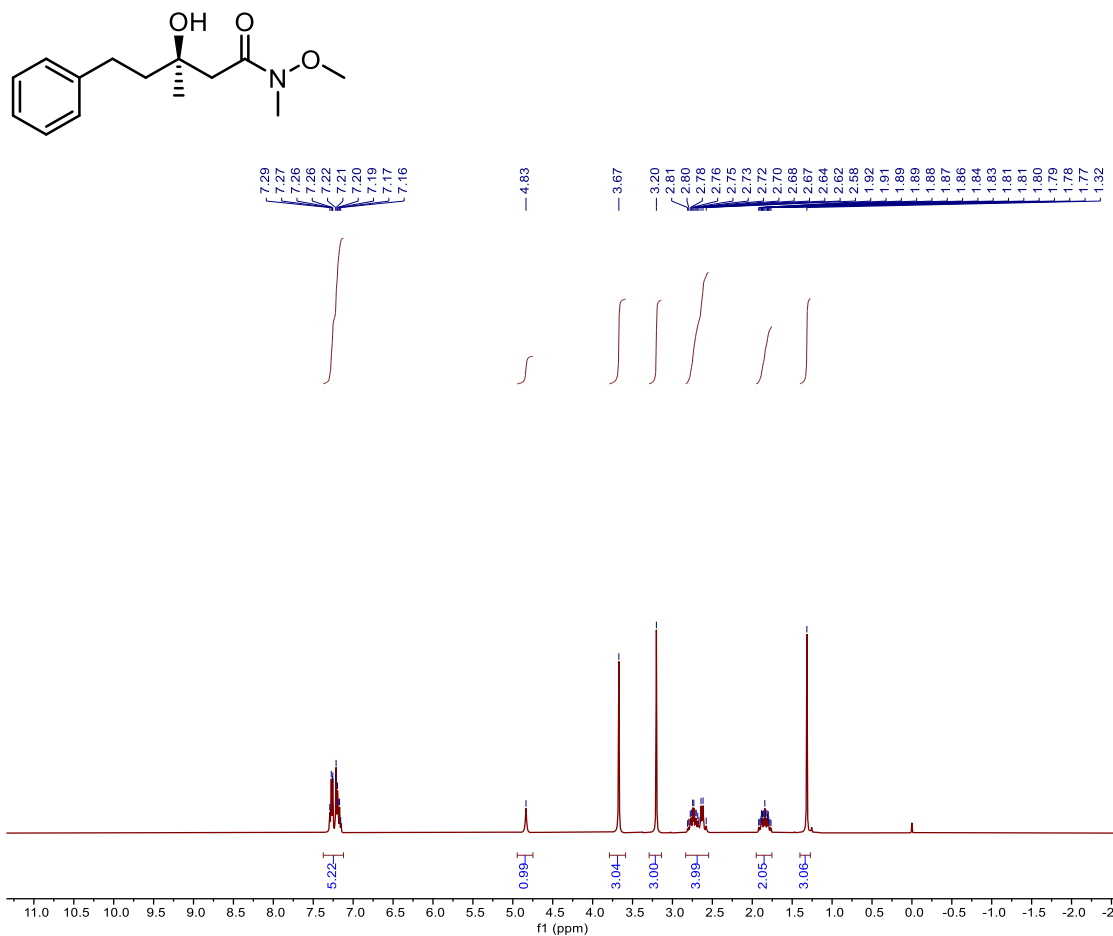

Supplementary Figure 86. <sup>1</sup>H NMR (400 MHz, CDCl<sub>3</sub>) of 3d-ol.

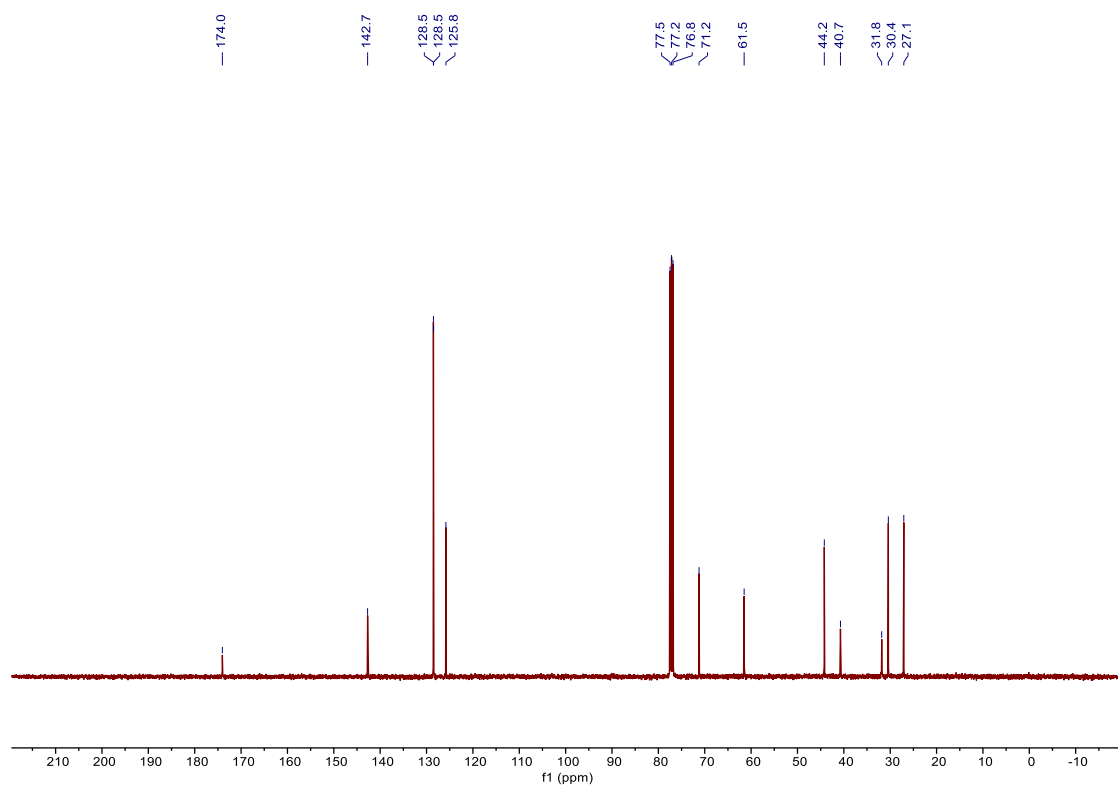

Supplementary Figure 87. <sup>13</sup>C NMR (101 MHz, CDCl<sub>3</sub>) of 3d-ol.

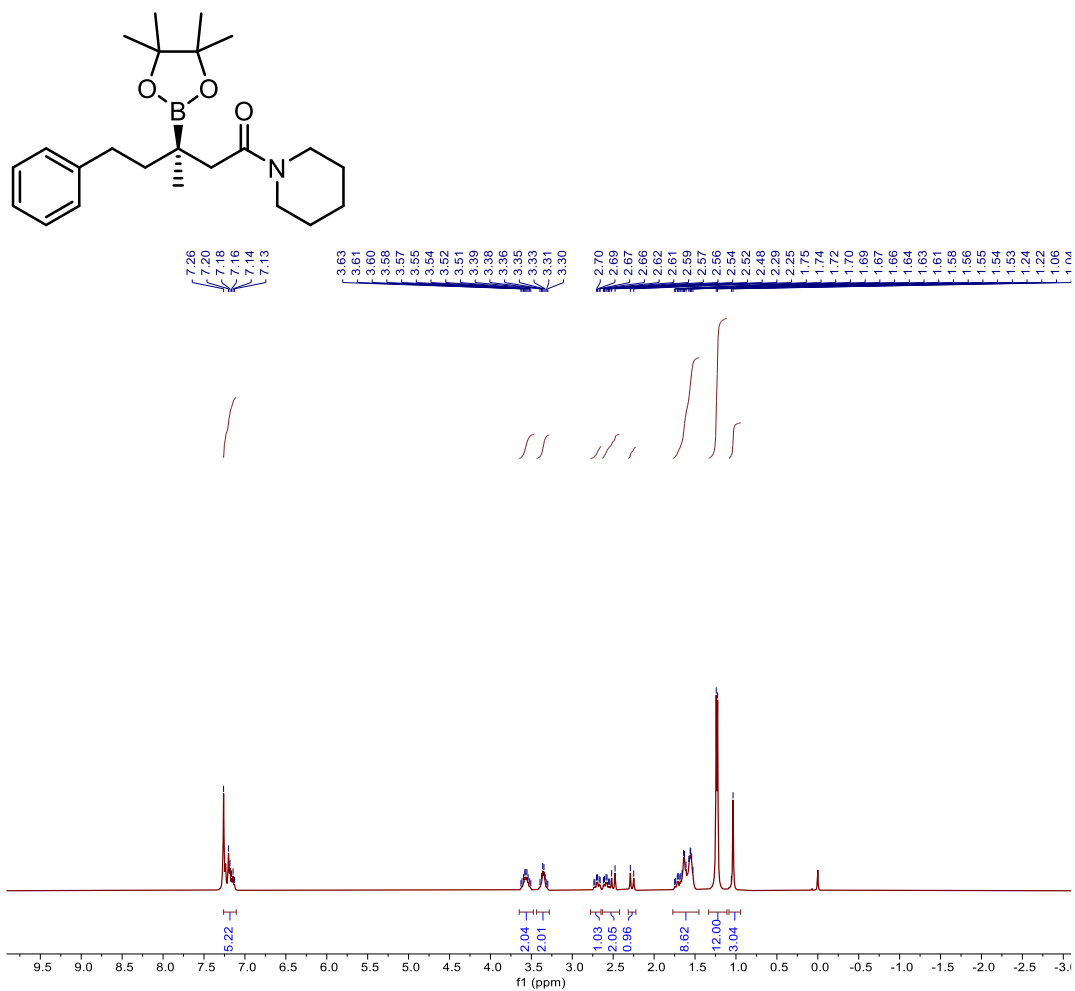

Supplementary Figure 88.  $^1\text{H}$  NMR (400 MHz,  $\text{CDCl}_3$ ) of **3e**.

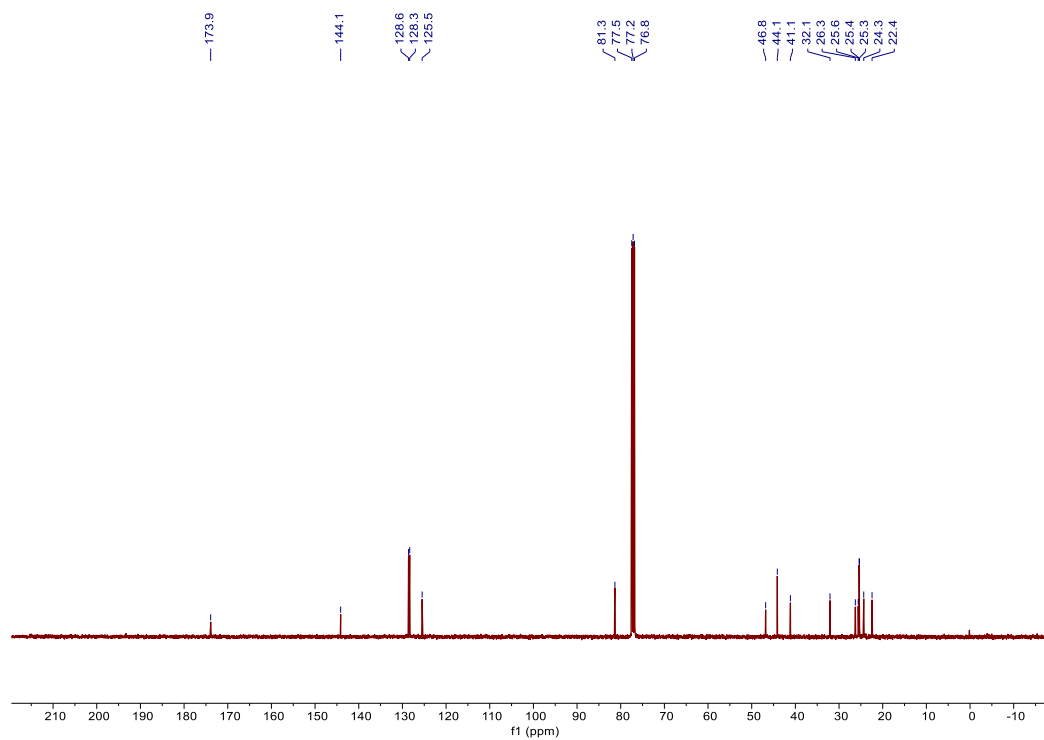

Supplementary Figure 89.  $^{13}\text{C}$  NMR (101 MHz,  $\text{CDCl}_3$ ) of **3e**.

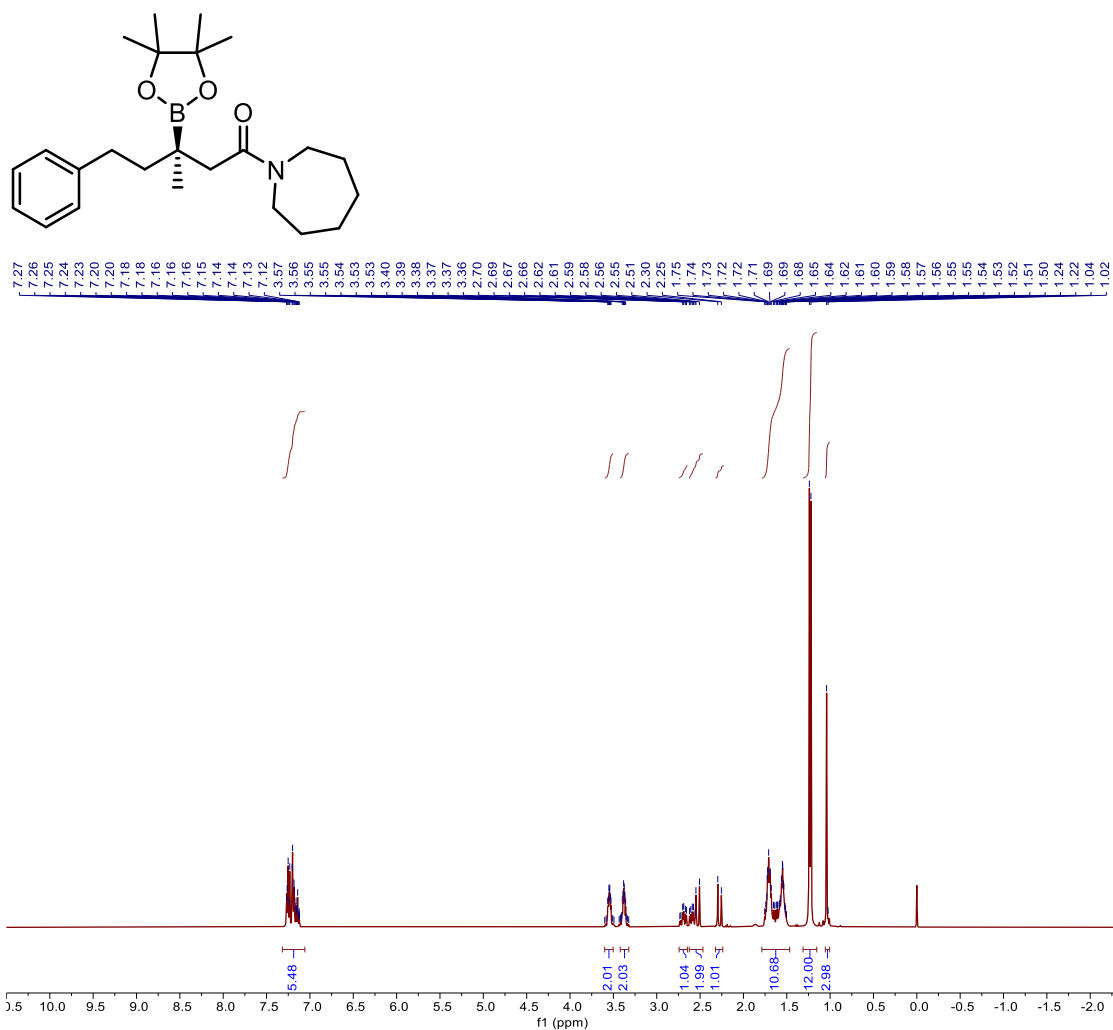

Supplementary Figure 90.  $^1\text{H}$  NMR (400 MHz,  $\text{CDCl}_3$ ) of **3f**.

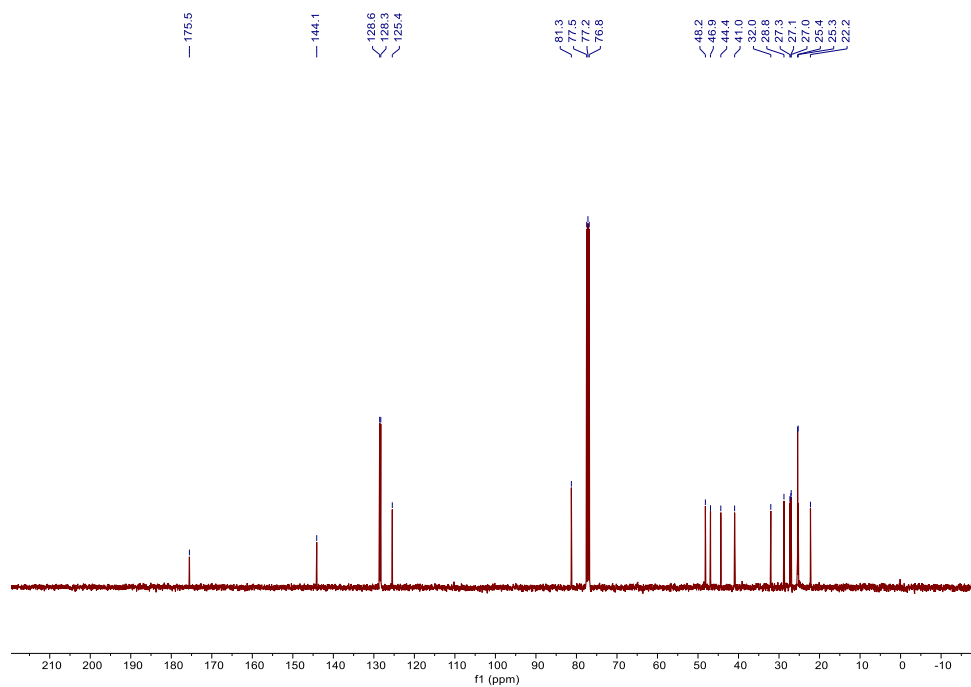

Supplementary Figure 91.  $^{13}\text{C}$  NMR (101 MHz,  $\text{CDCl}_3$ ) of **3f**.

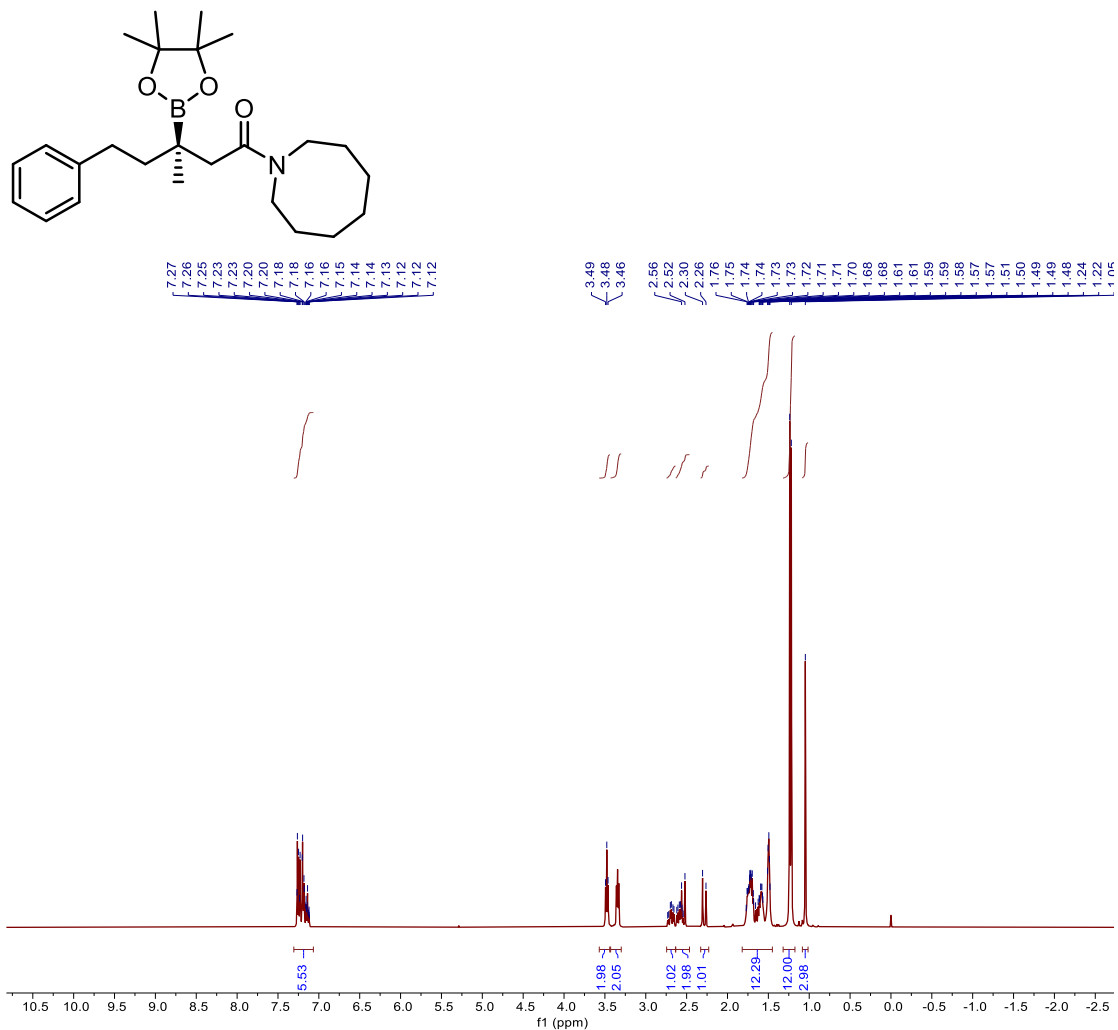

Supplementary Figure 92.  $^1\text{H}$  NMR (400 MHz,  $\text{CDCl}_3$ ) of **3g**.

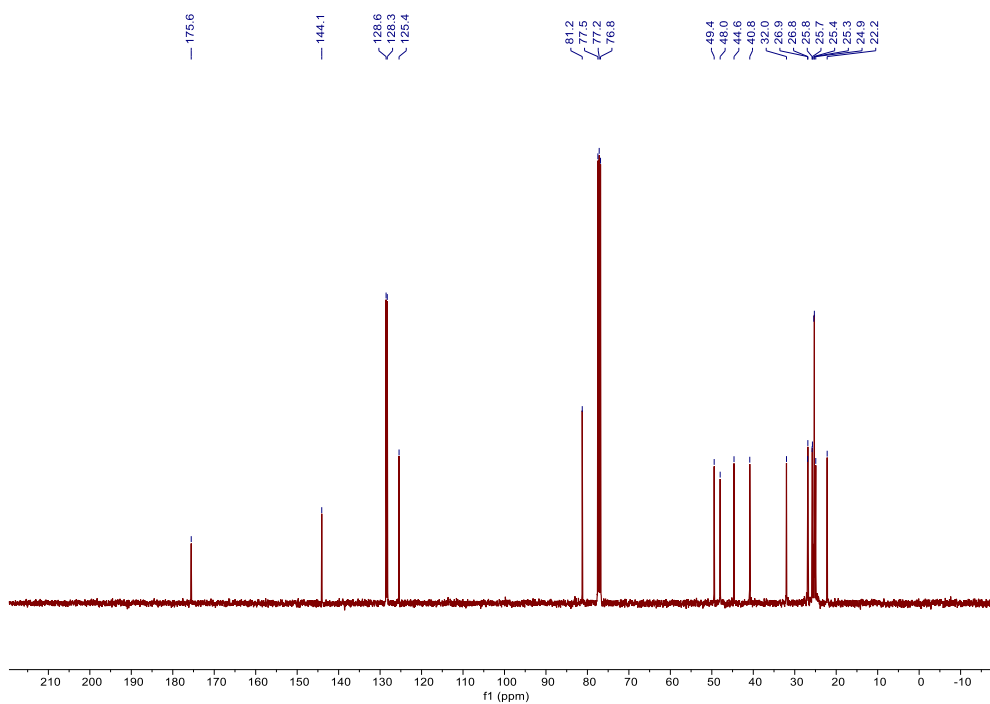

Supplementary Figure 93.  $^{13}\text{C}$  NMR (101 MHz,  $\text{CDCl}_3$ ) of **3g**.



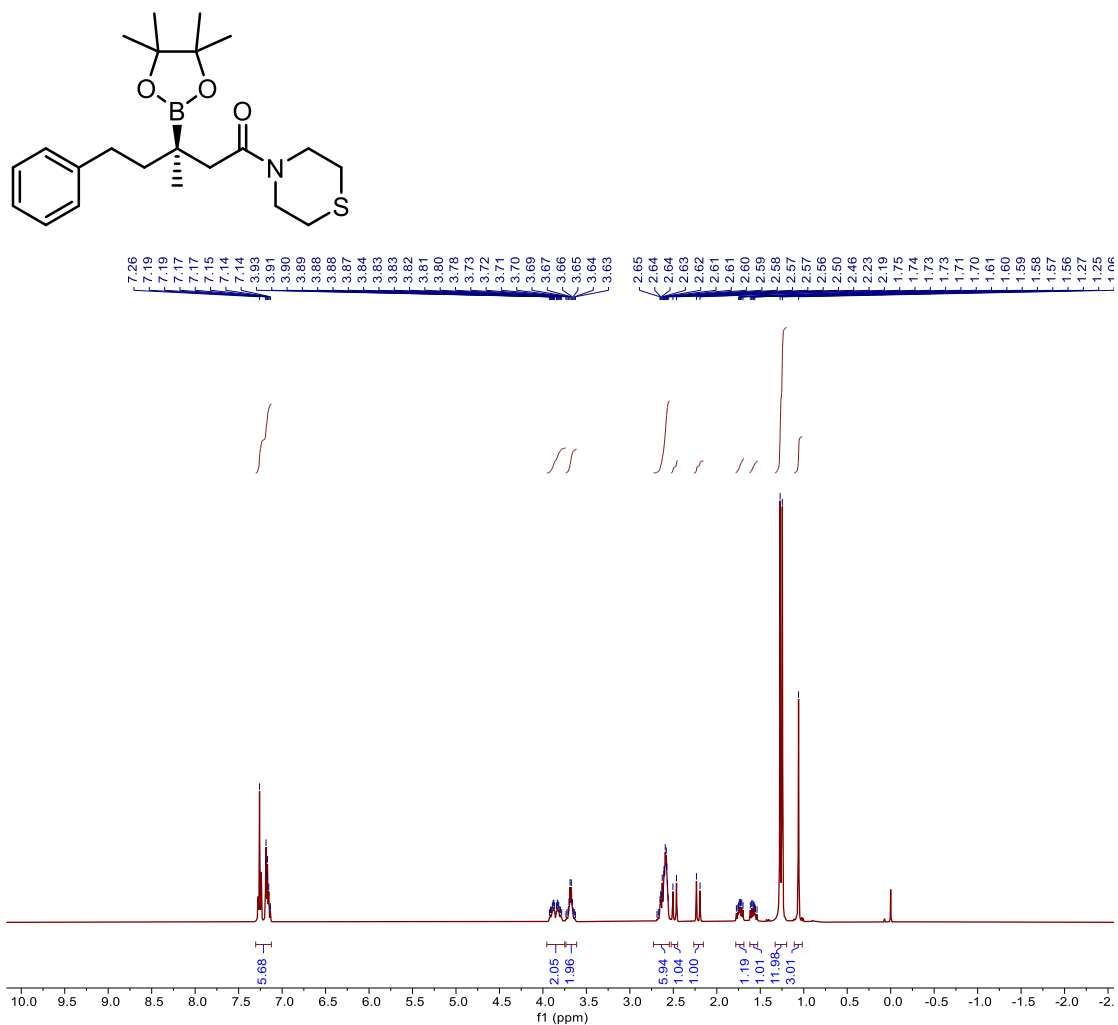

Supplementary Figure 94. <sup>1</sup>H NMR (400 MHz, CDCl<sub>3</sub>) of **3h**.

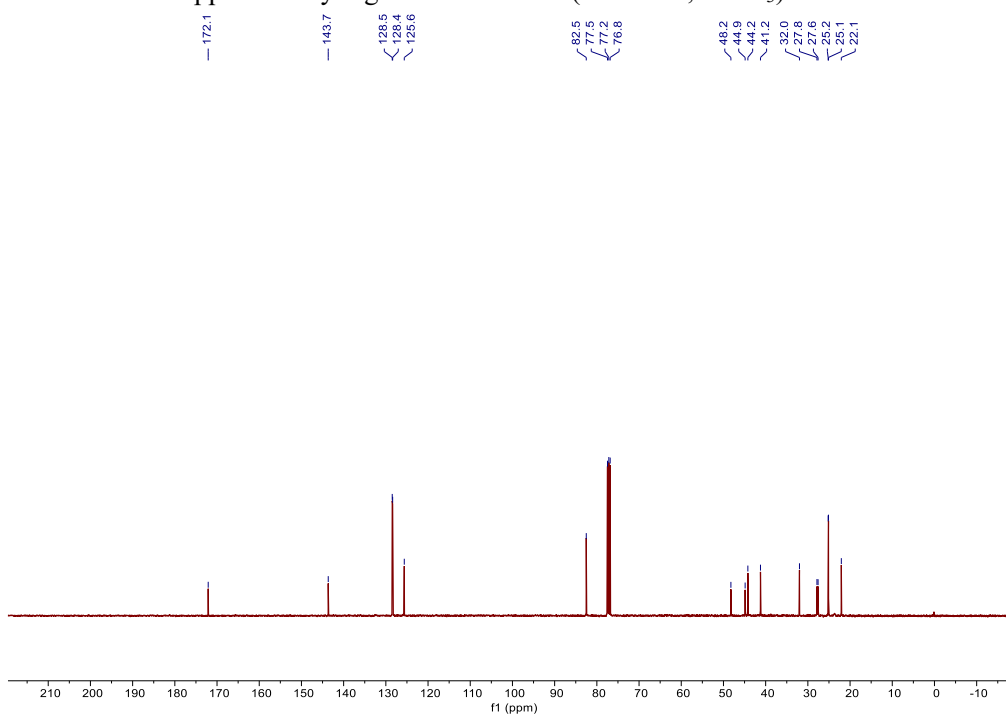

Supplementary Figure 95. <sup>13</sup>C NMR (101 MHz, CDCl<sub>3</sub>) of **3h**.

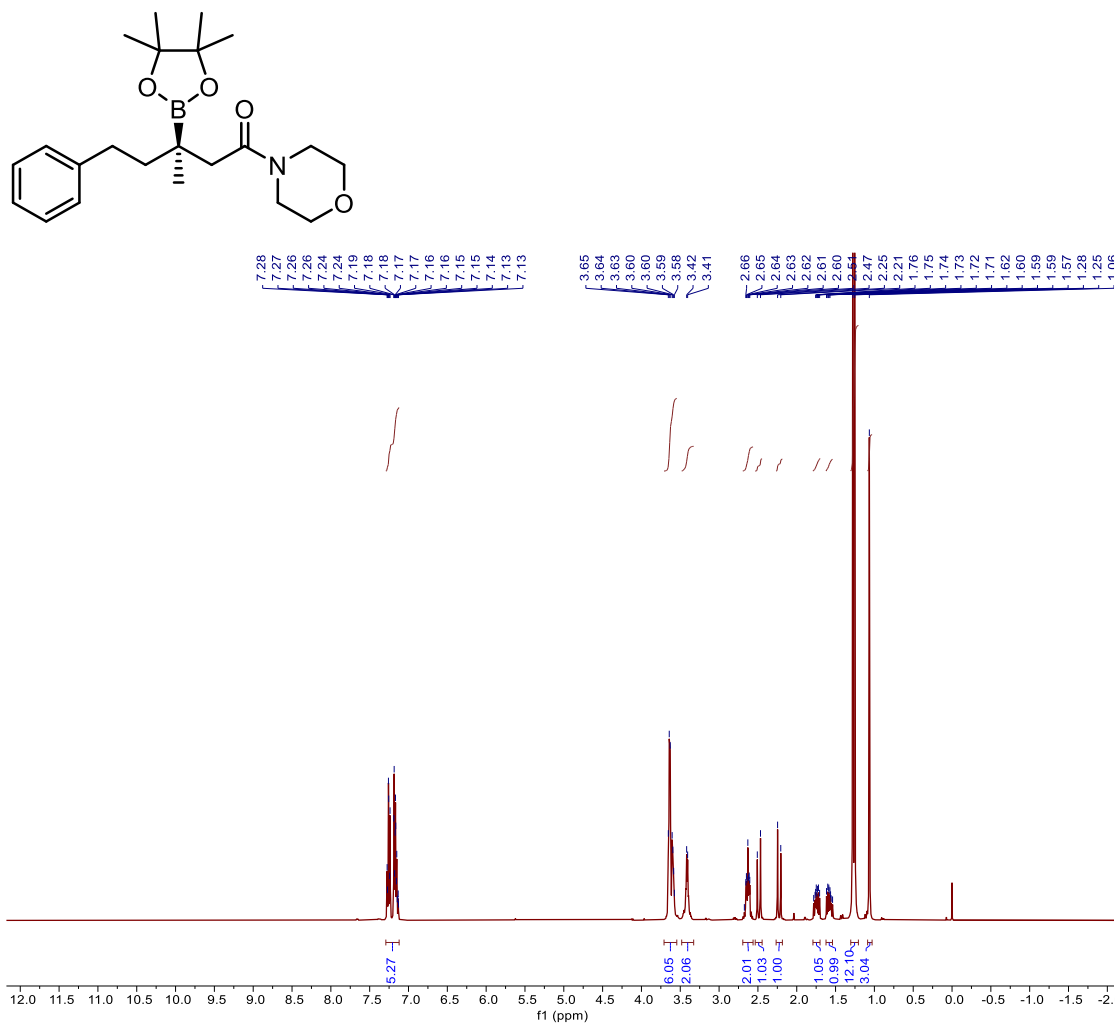

Supplementary Figure 96.  $^1\text{H}$  NMR (400 MHz,  $\text{CDCl}_3$ ) of **3i**.

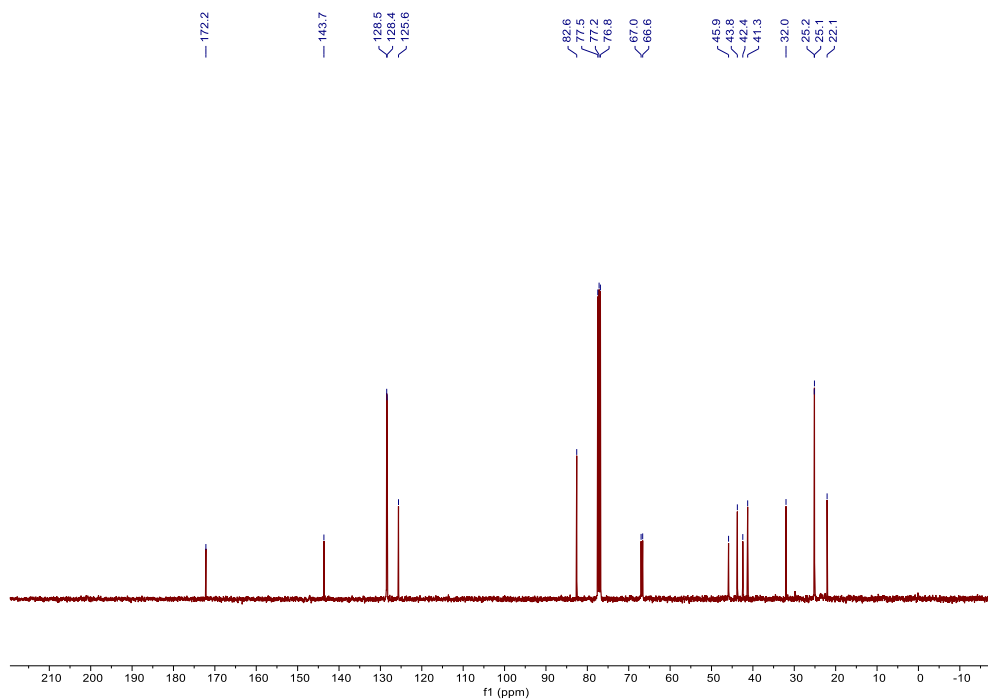

Supplementary Figure 97.  $^{13}\text{C}$  NMR (101 MHz,  $\text{CDCl}_3$ ) of **3i**.

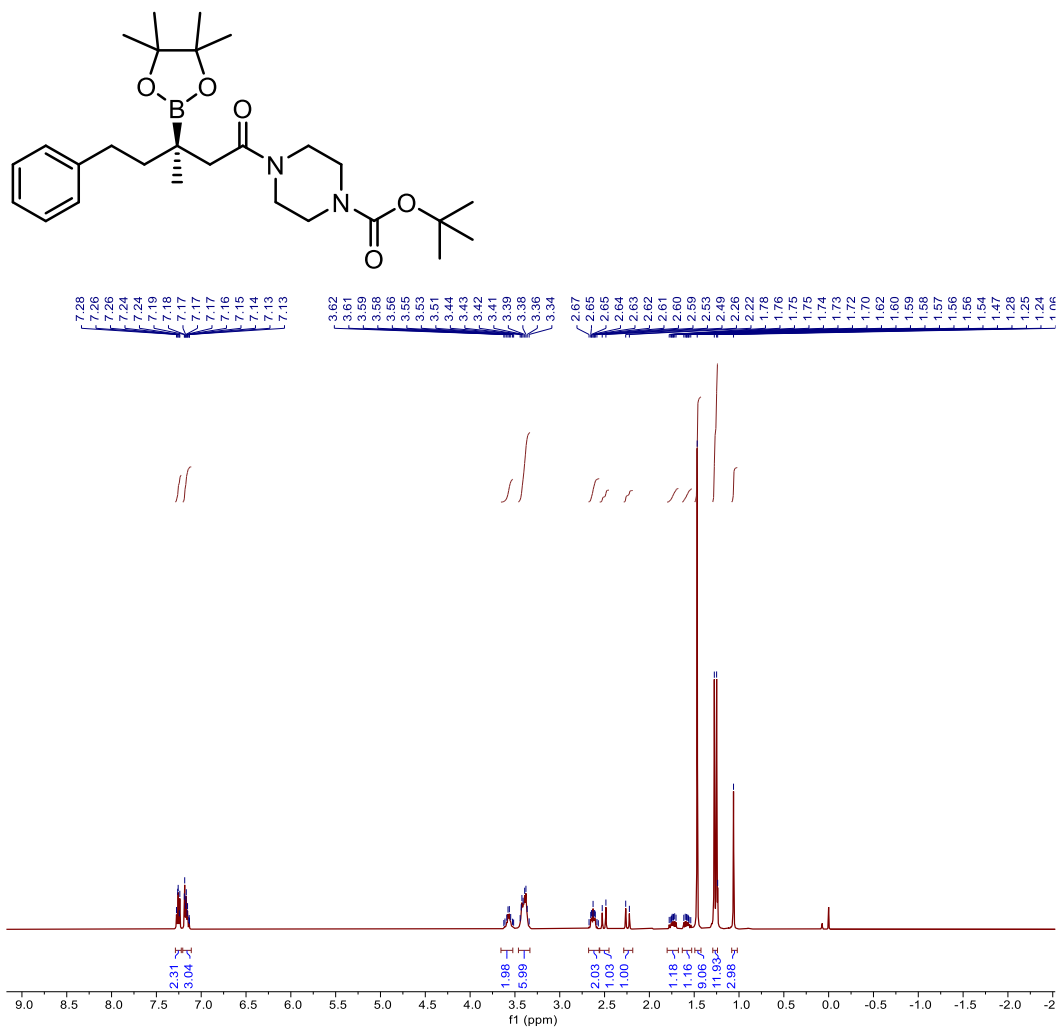

Supplementary Figure 98.  $^1\text{H}$  NMR (400 MHz,  $\text{CDCl}_3$ ) of **3j**.

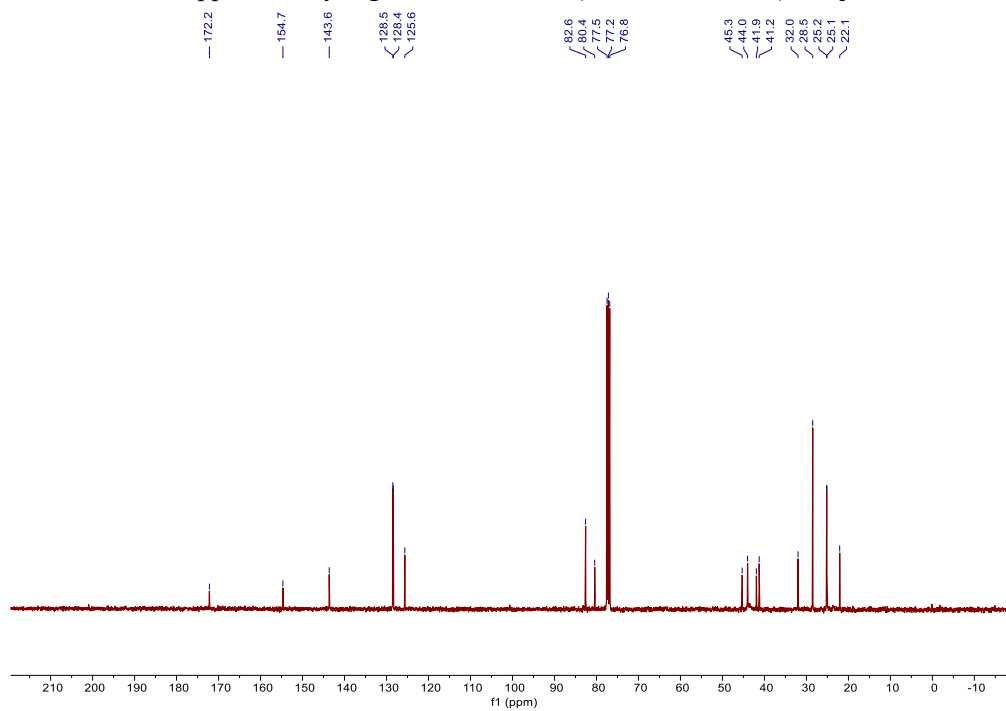

Supplementary Figure 99.  $^{13}\text{C}$  NMR (101 MHz,  $\text{CDCl}_3$ ) of **3j**.

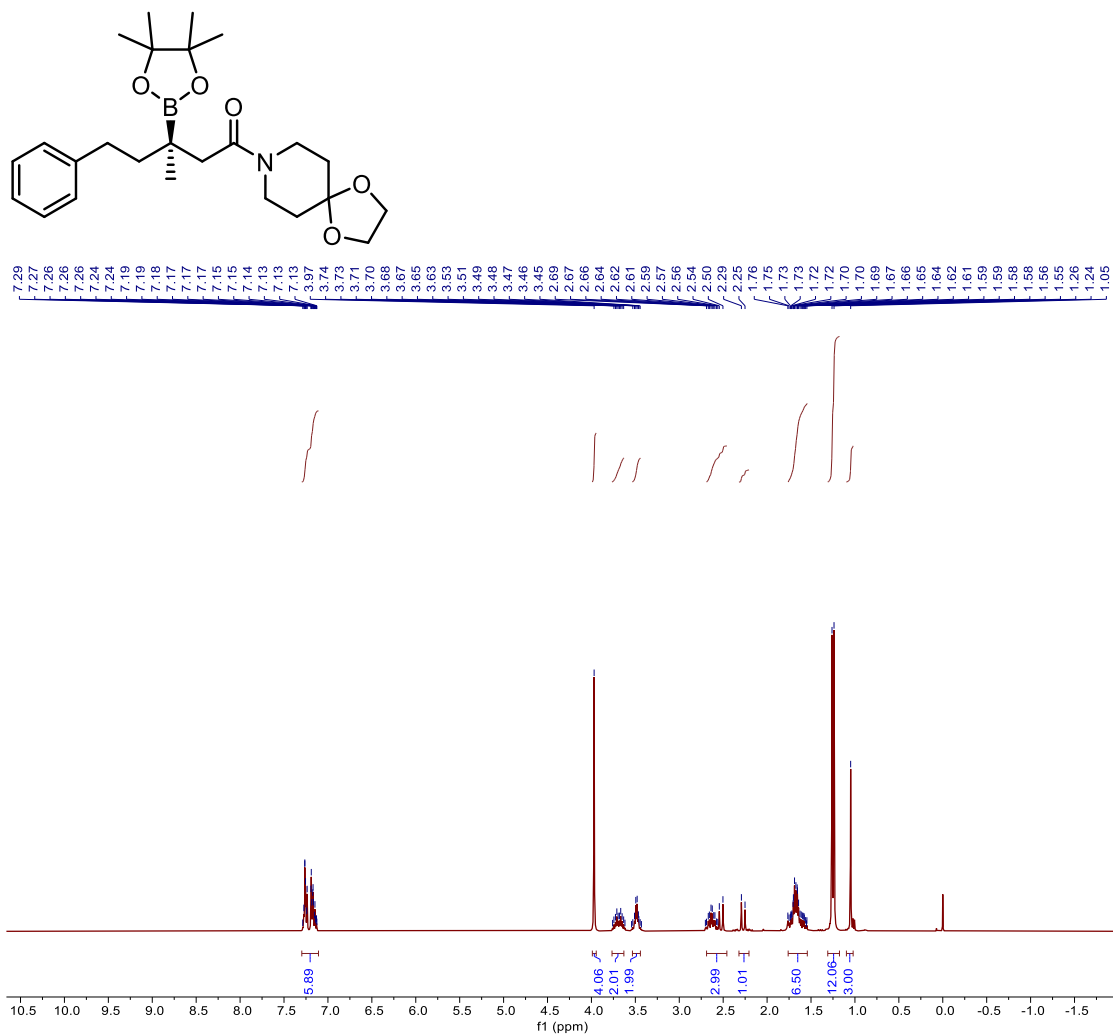

Supplementary Figure 100.  $^1\text{H}$  NMR (400 MHz,  $\text{CDCl}_3$ ) of **3k**.

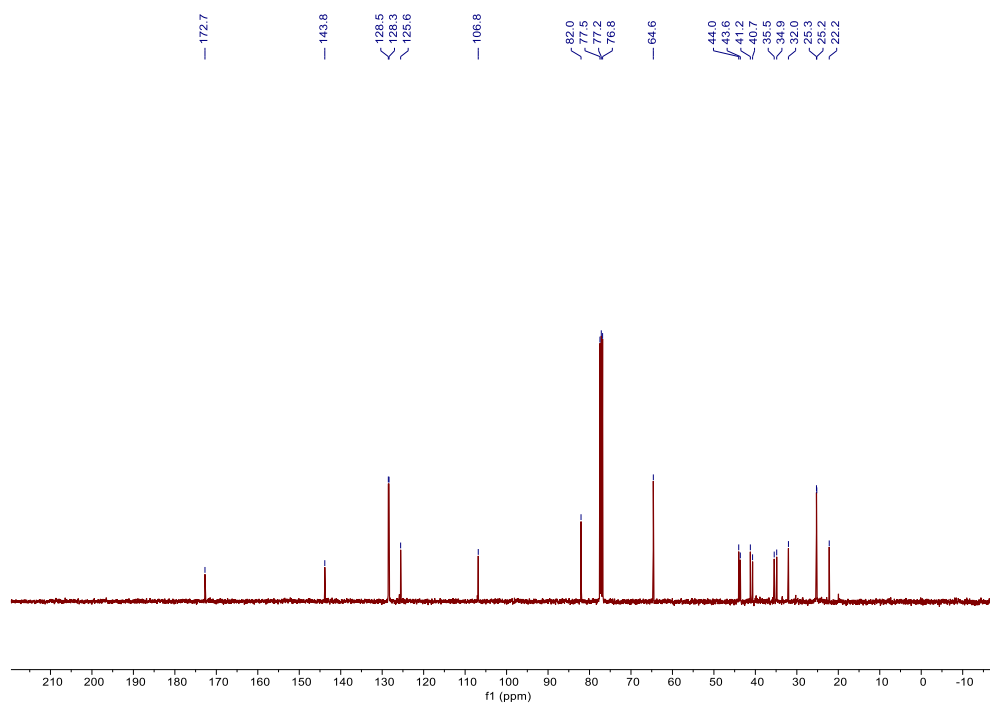

Supplementary Figure 101.  $^{13}\text{C}$  NMR (101 MHz,  $\text{CDCl}_3$ ) of **3k**.

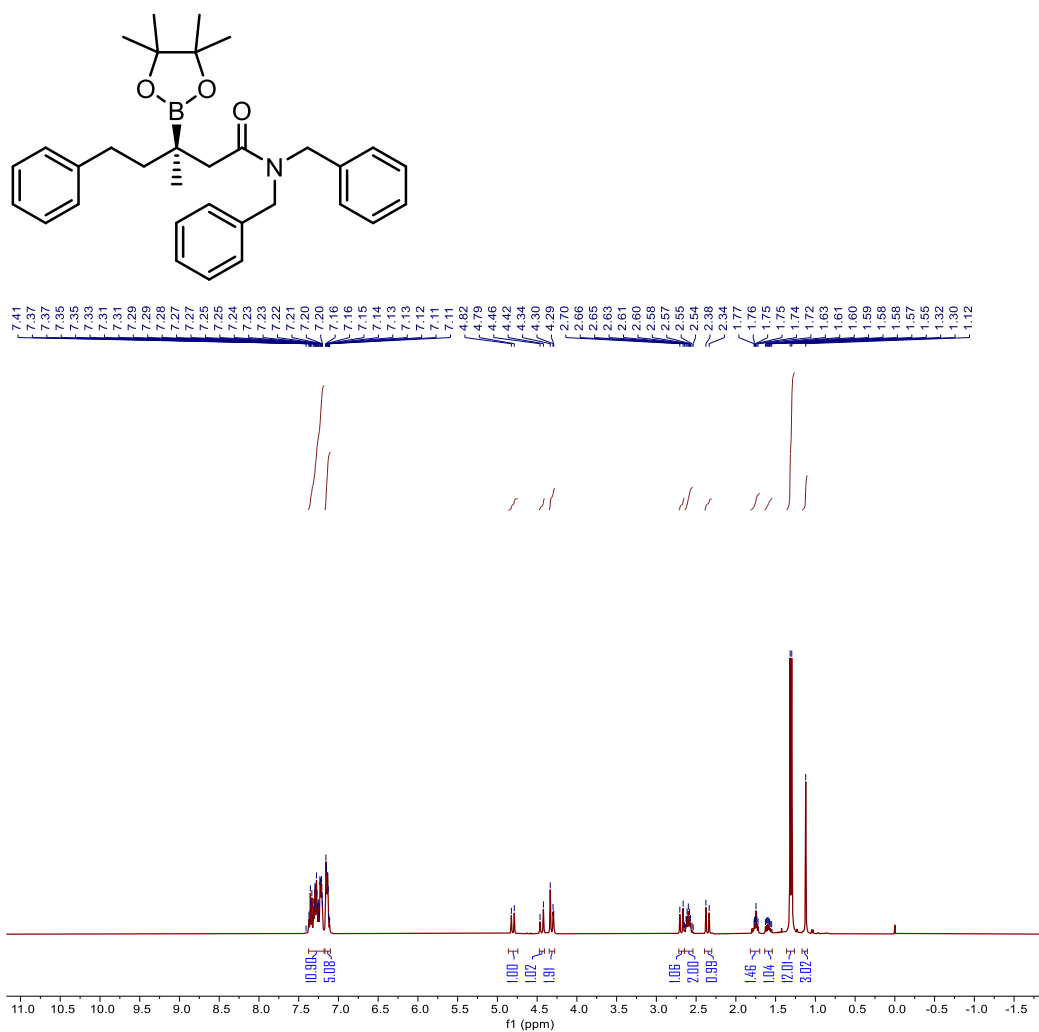

Supplementary Figure 102.  $^1\text{H}$  NMR (400 MHz,  $\text{CDCl}_3$ ) of **31**.

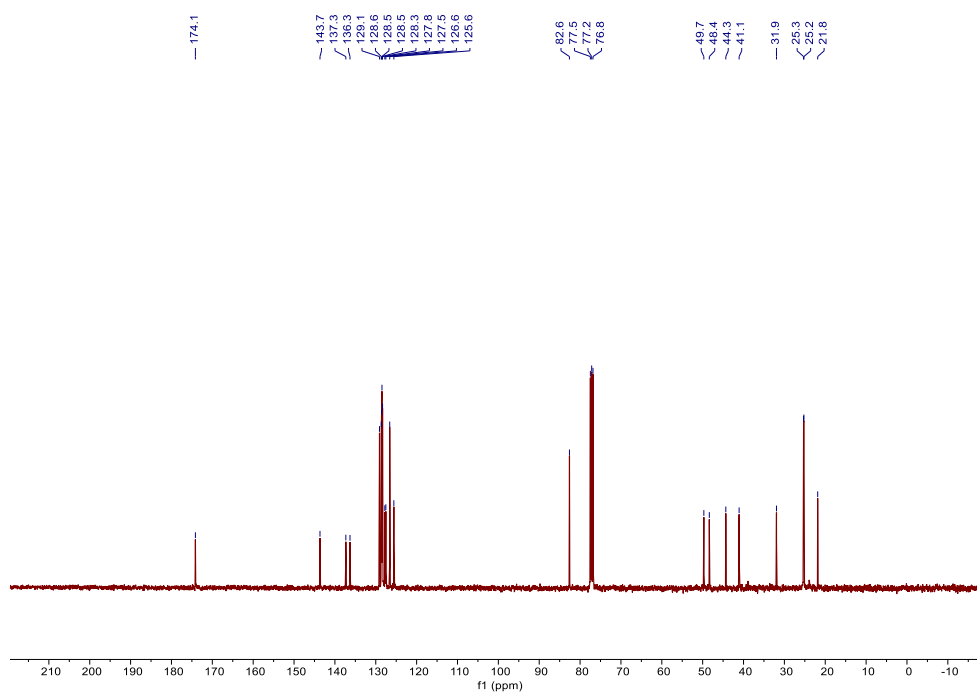

Supplementary Figure 103.  $^{13}\text{C}$  NMR (101 MHz,  $\text{CDCl}_3$ ) of **31**.

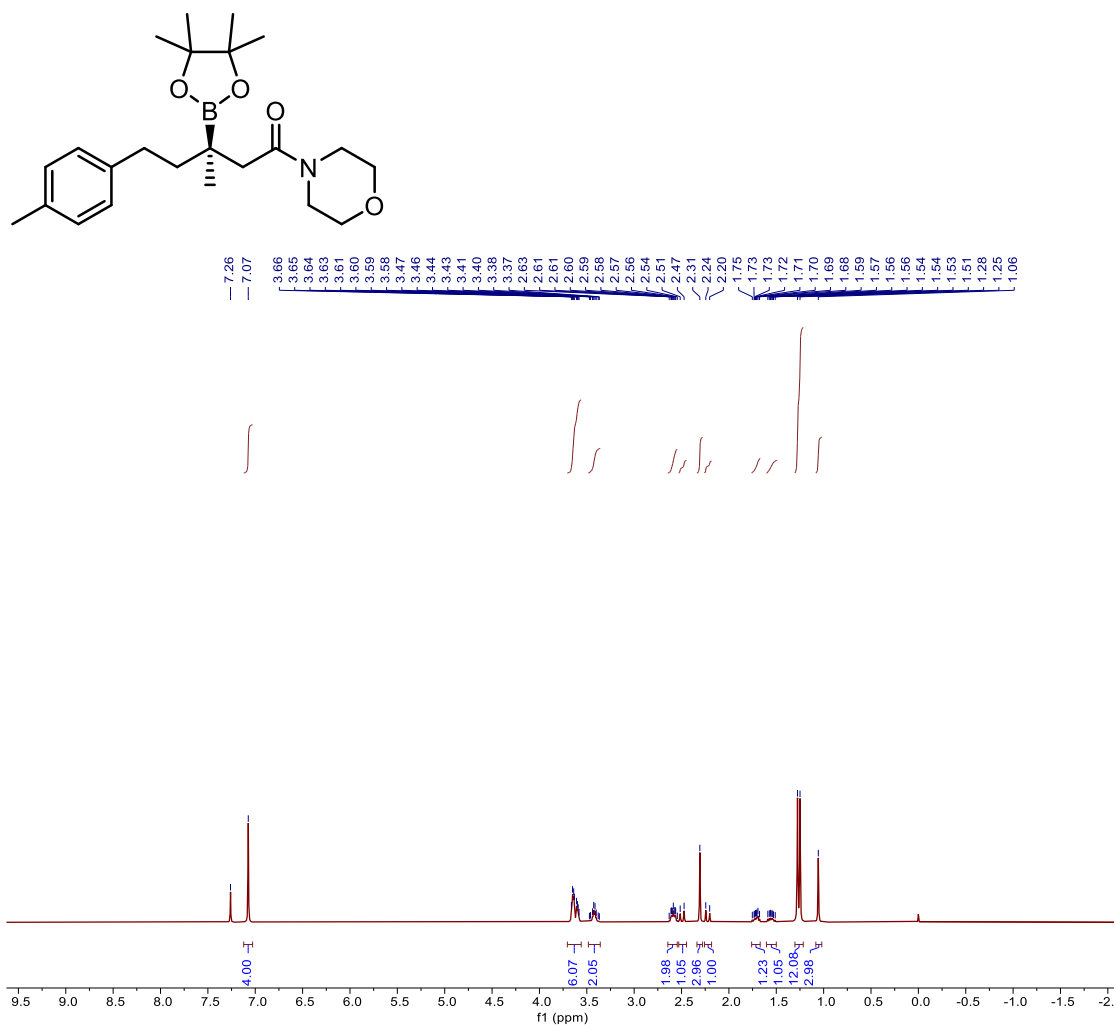

Supplementary Figure 104.  $^1\text{H}$  NMR (400 MHz,  $\text{CDCl}_3$ ) of **3m**.

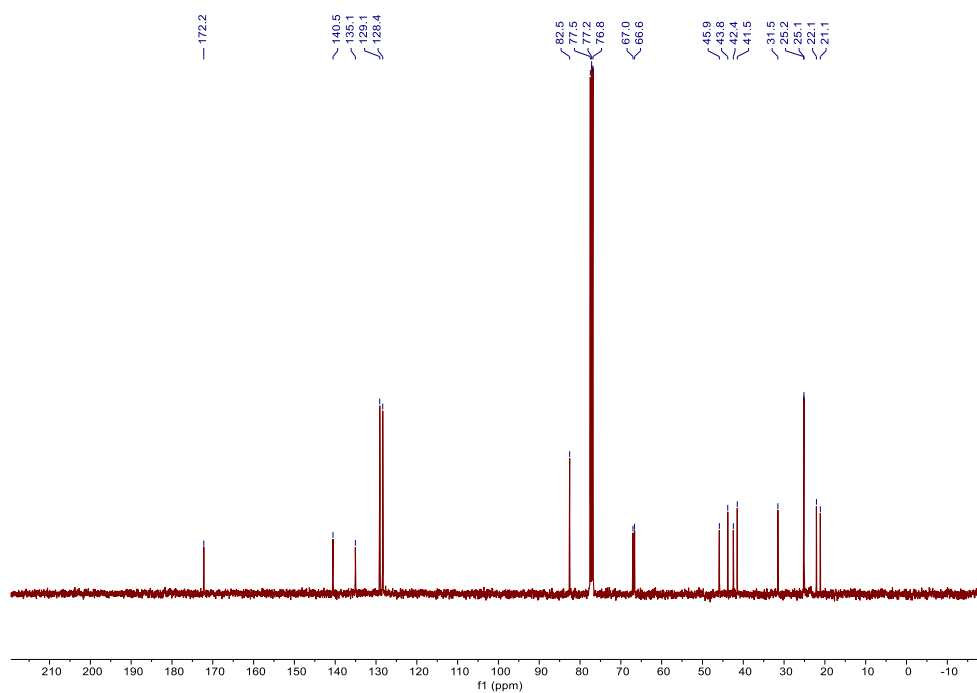

Supplementary Figure 105.  $^{13}\text{C}$  NMR (101 MHz,  $\text{CDCl}_3$ ) of **3m**.

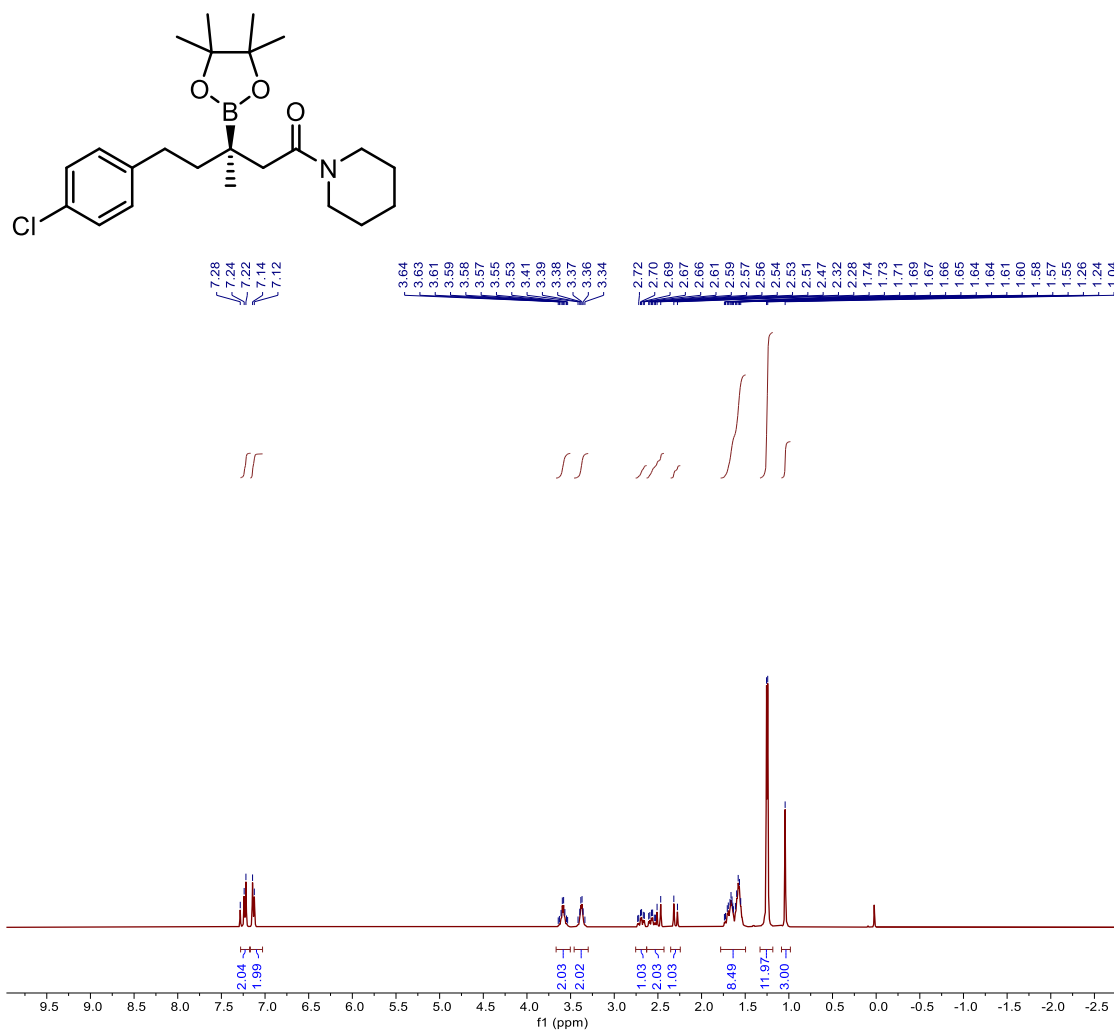

Supplementary Figure 106.  $^1\text{H}$  NMR (400 MHz,  $\text{CDCl}_3$ ) of **3n**.

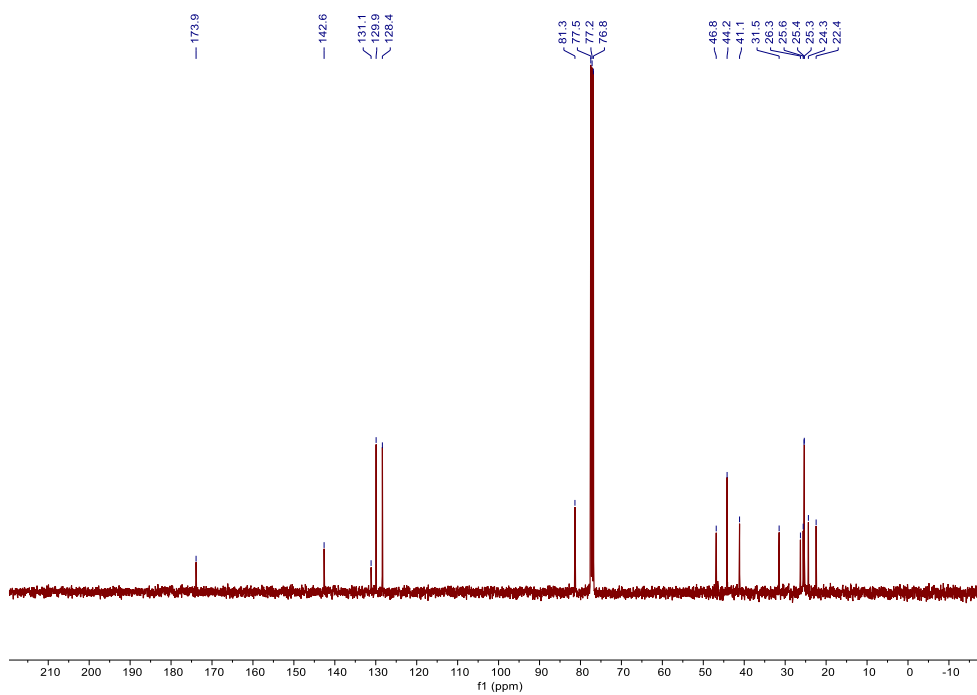

Supplementary Figure 107.  $^{13}\text{C}$  NMR (101 MHz,  $\text{CDCl}_3$ ) of **3n**.

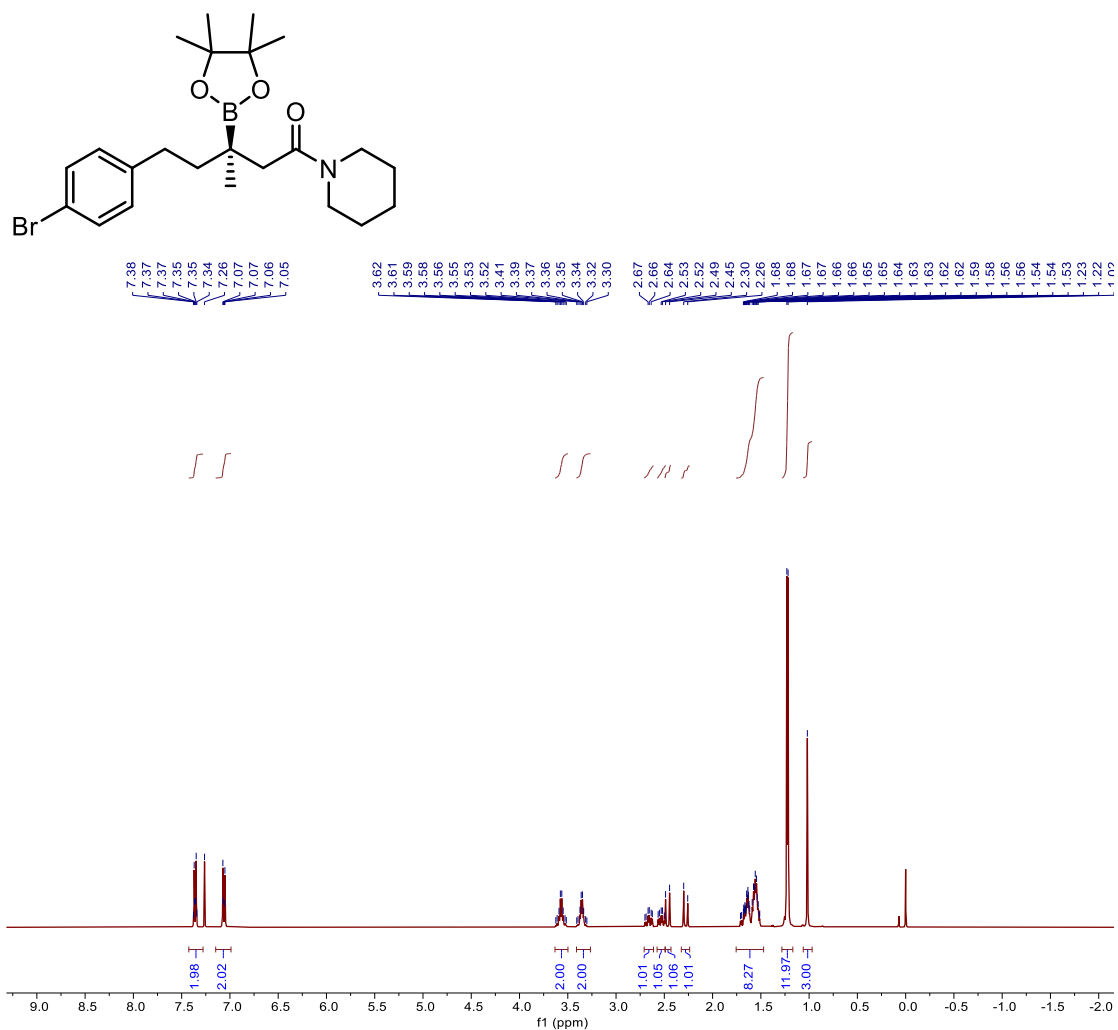

Supplementary Figure 108.  $^1\text{H}$  NMR (400 MHz,  $\text{CDCl}_3$ ) of **30**.

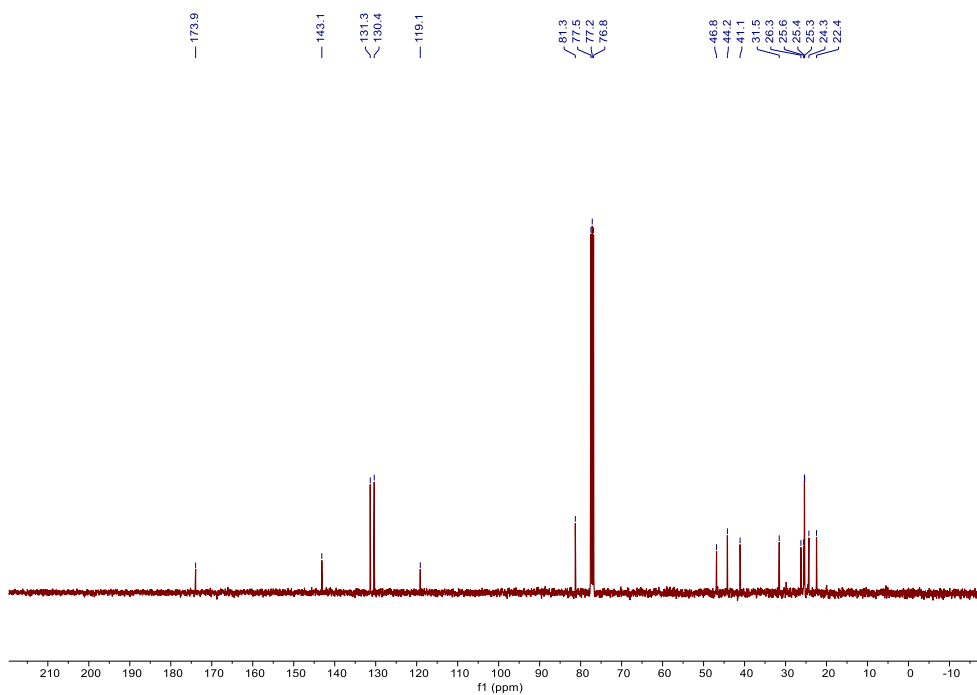

Supplementary Figure 109.  $^{13}\text{C}$  NMR (101 MHz,  $\text{CDCl}_3$ ) of **30**.



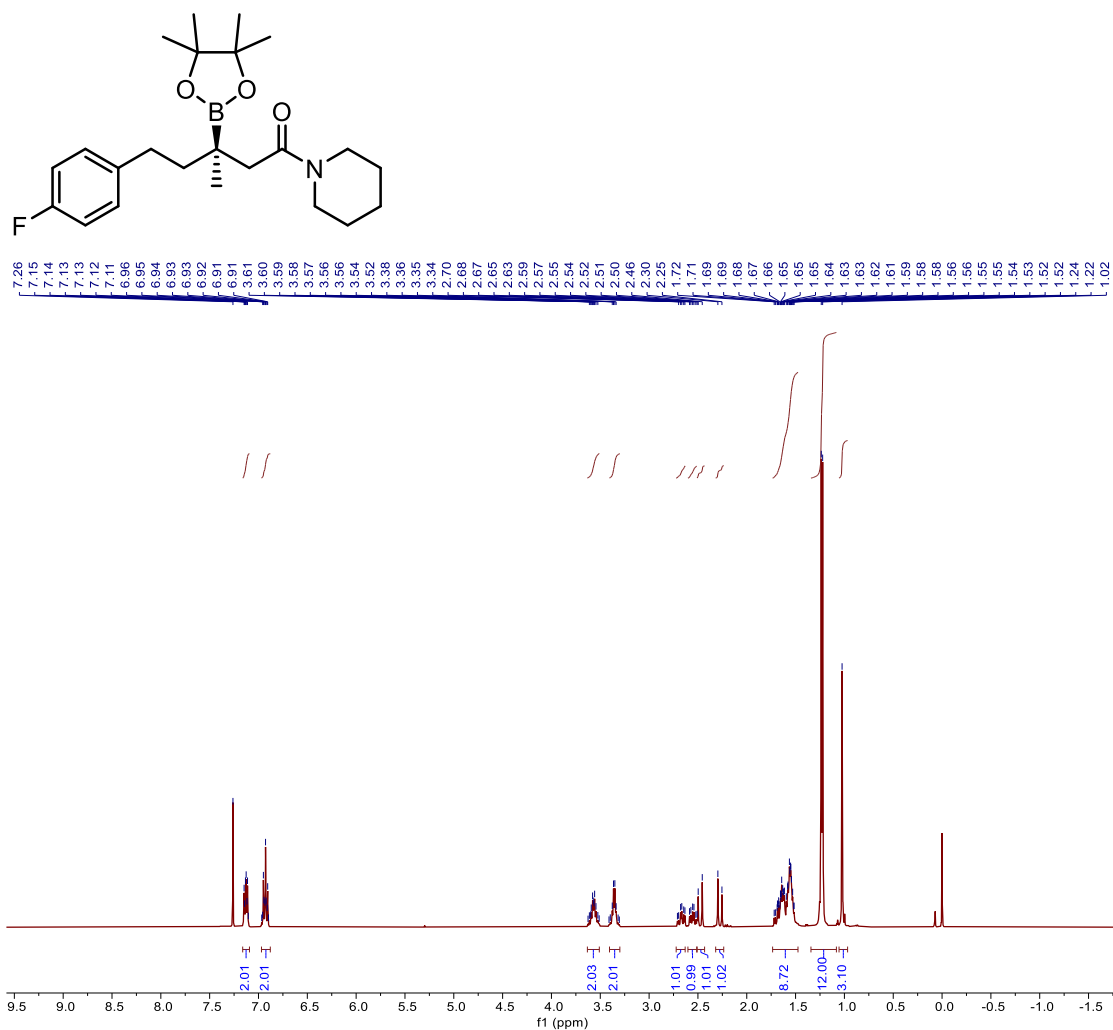

Supplementary Figure 110.  $^1\text{H}$  NMR (400 MHz,  $\text{CDCl}_3$ ) of **3p**.

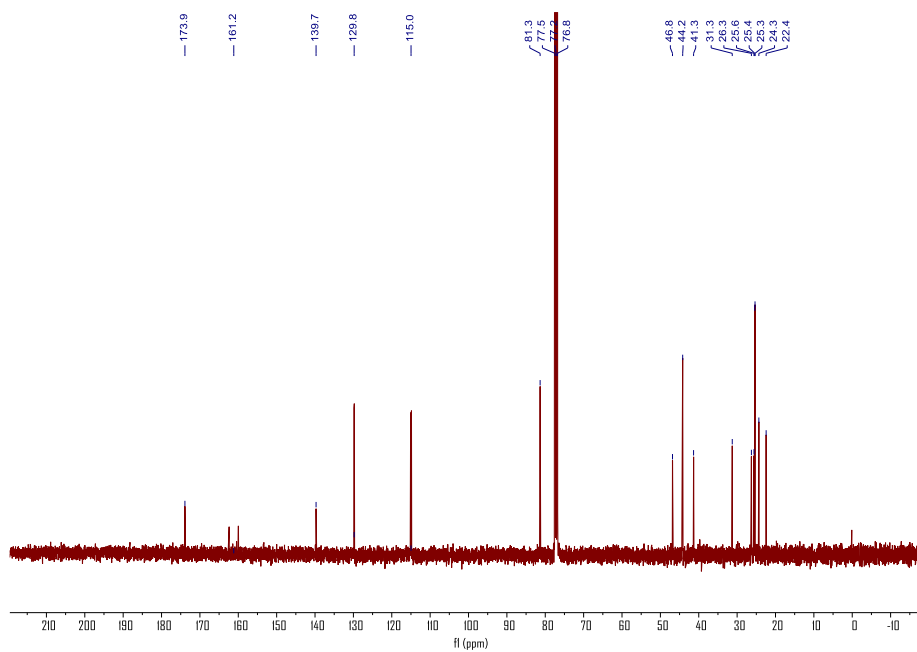

Supplementary Figure 111.  $^{13}\text{C}$  NMR (101 MHz,  $\text{CDCl}_3$ ) of **3p**.

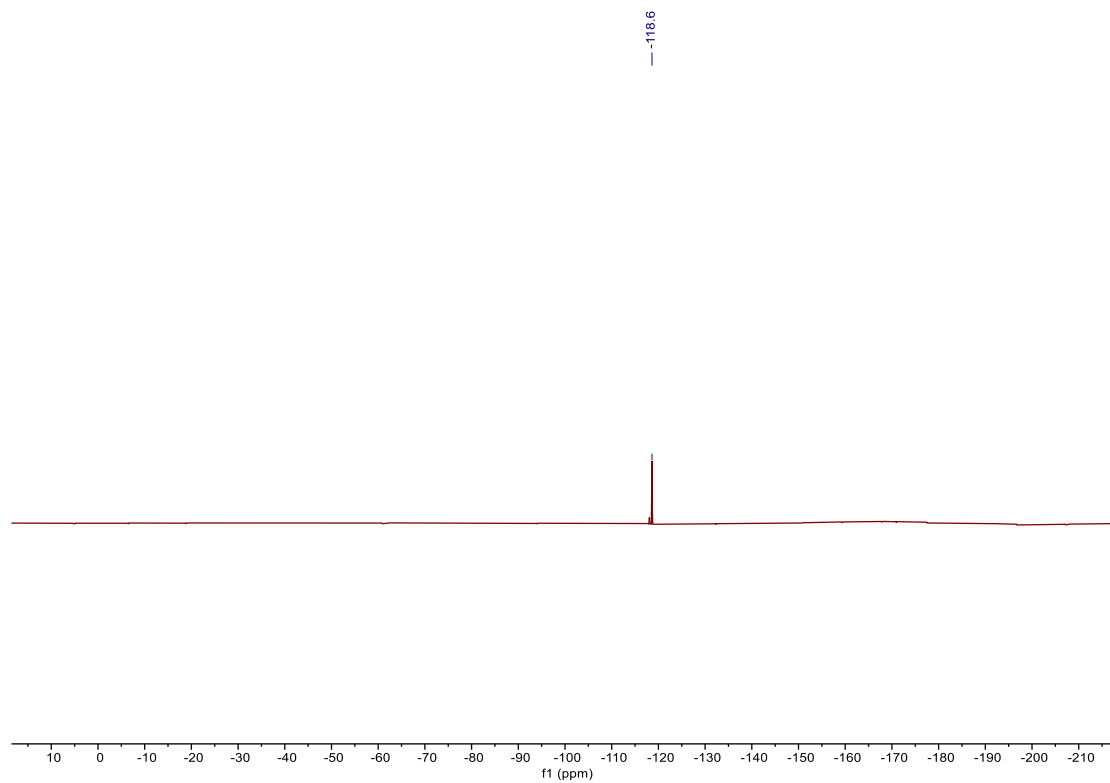

Supplementary Figure 112.  $^{19}\text{F}$  NMR (376 MHz,  $\text{CDCl}_3$ ) of **3p**.

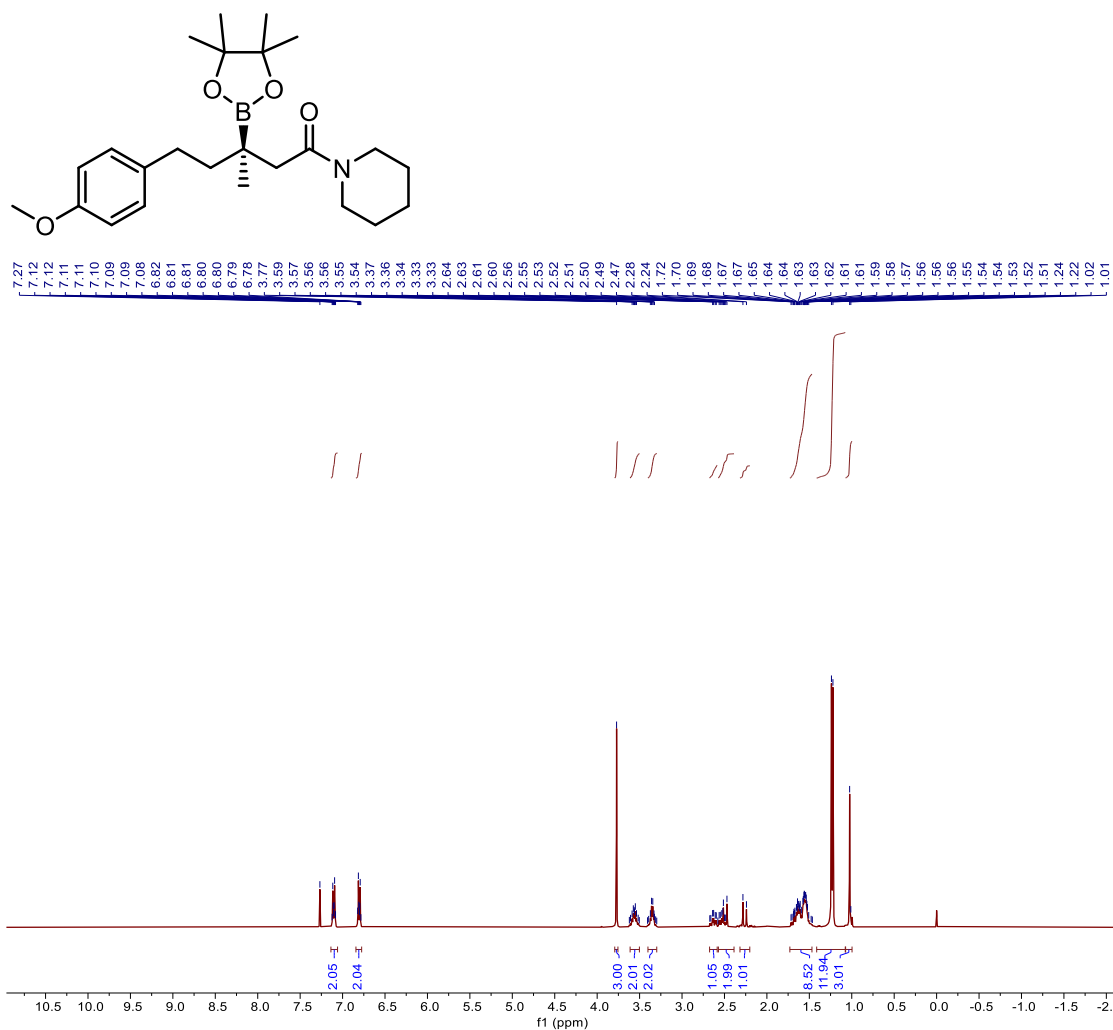

Supplementary Figure 113.  $^1\text{H}$  NMR (400 MHz,  $\text{CDCl}_3$ ) of **3q**.

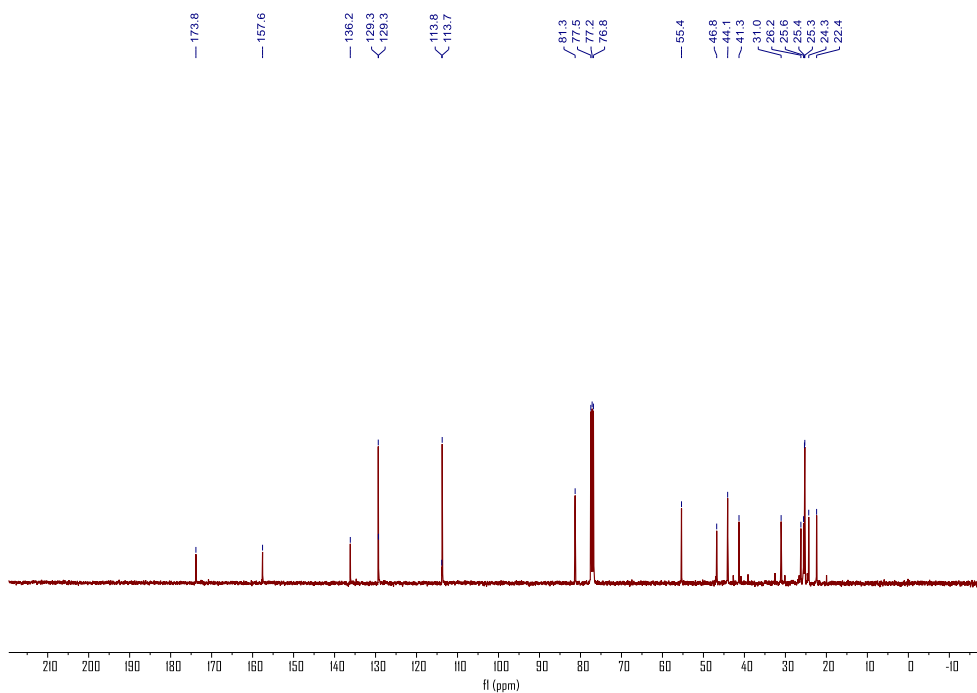

Supplementary Figure 114.  $^{13}\text{C}$  NMR (101 MHz,  $\text{CDCl}_3$ ) of **3q**.

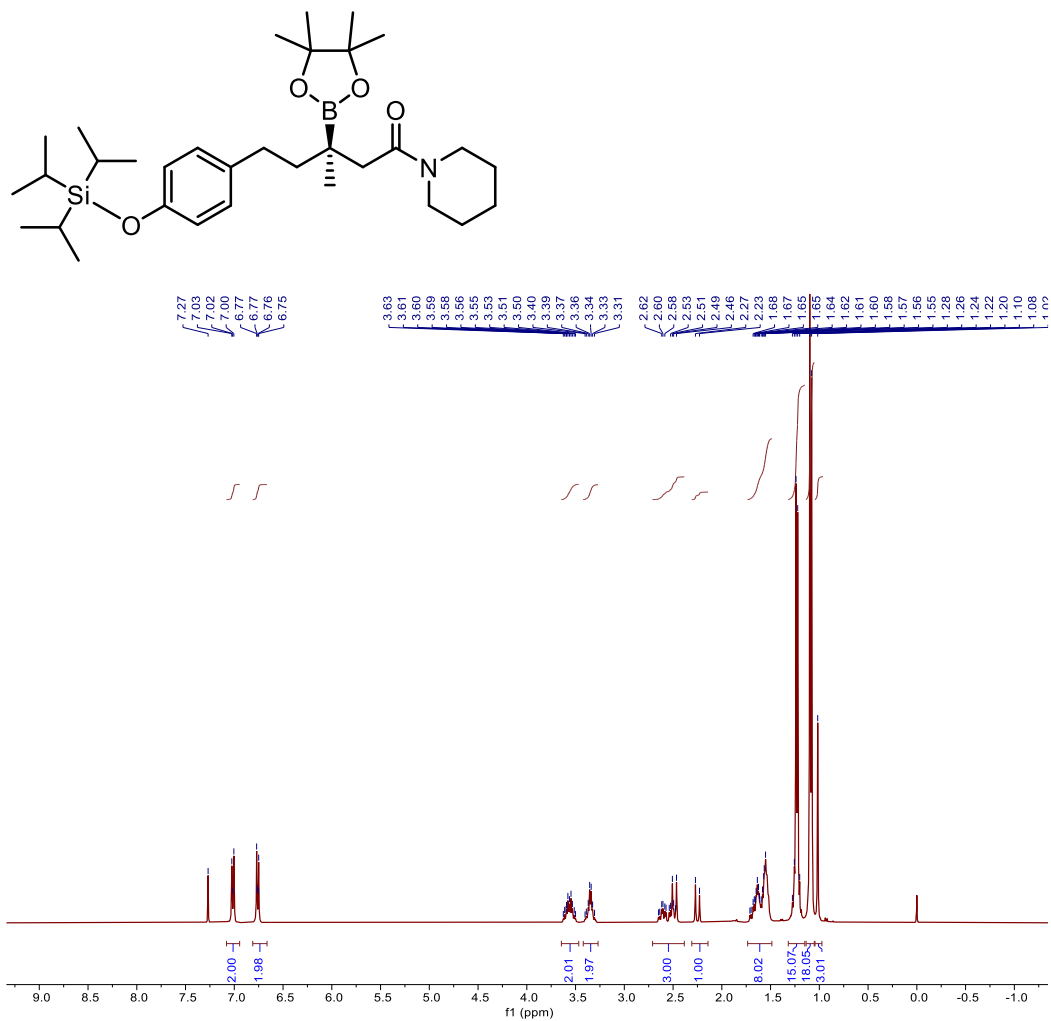

Supplementary Figure 115.  $^1\text{H}$  NMR (400 MHz,  $\text{CDCl}_3$ ) of **3r**.

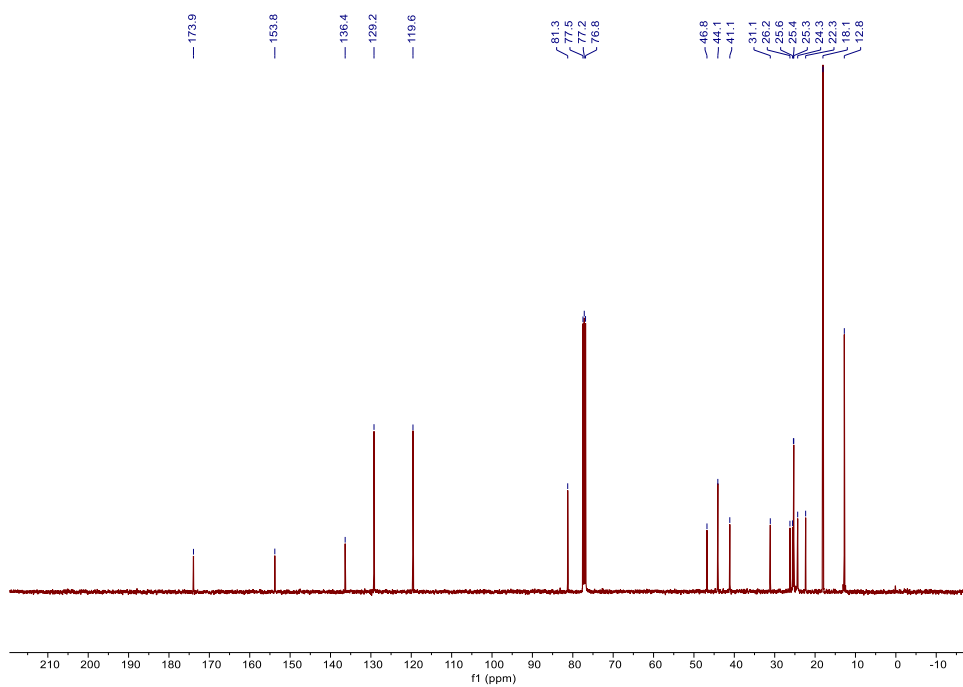

Supplementary Figure 116.  $^{13}\text{C}$  NMR (101 MHz,  $\text{CDCl}_3$ ) of **3r**.

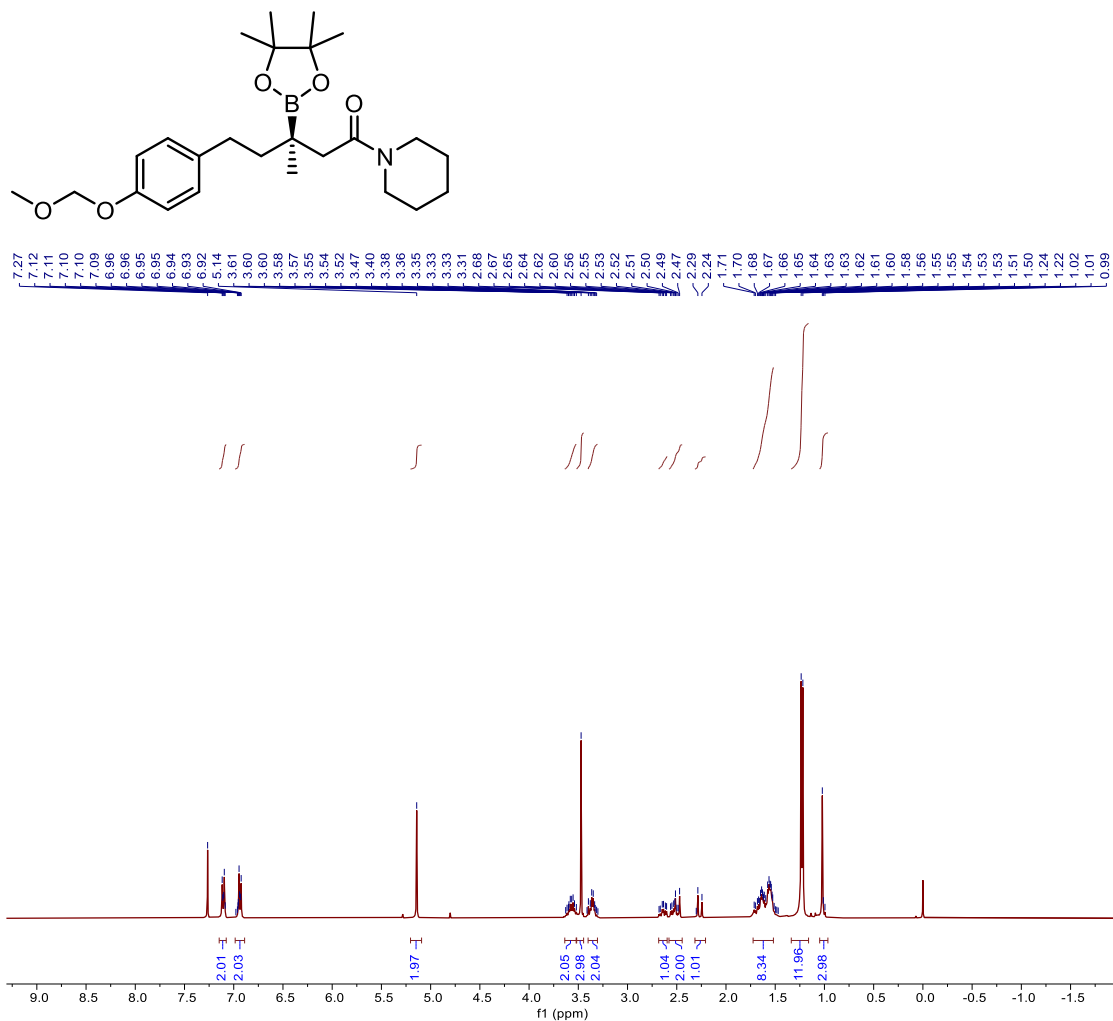

Supplementary Figure 117.  $^1\text{H}$  NMR (400 MHz,  $\text{CDCl}_3$ ) of **3s**.

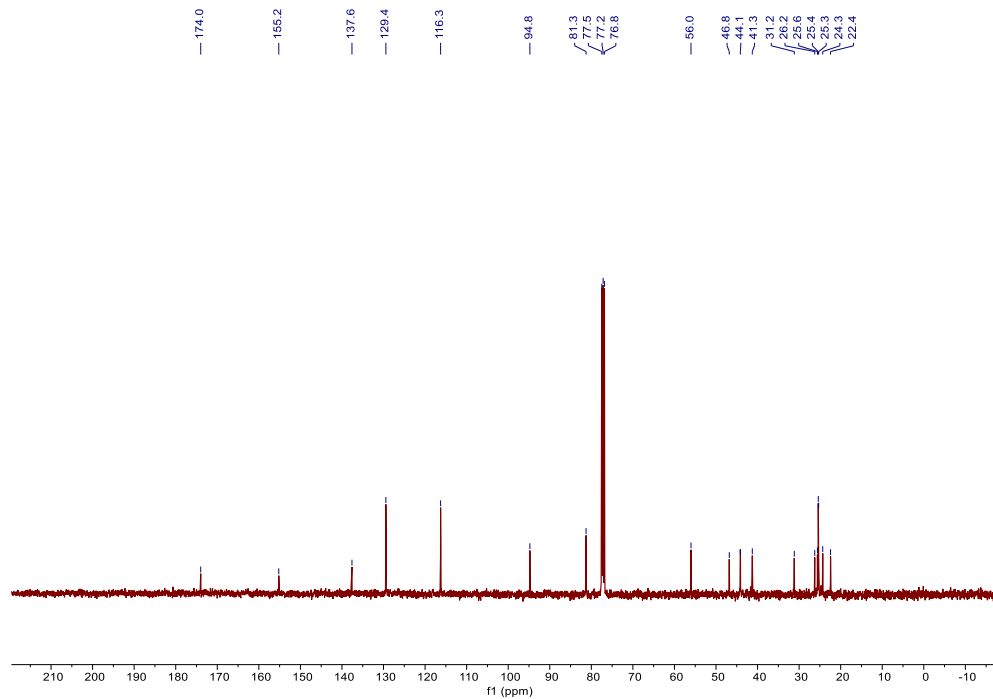

Supplementary Figure 118.  $^{13}\text{C}$  NMR (101 MHz,  $\text{CDCl}_3$ ) of **3s**.

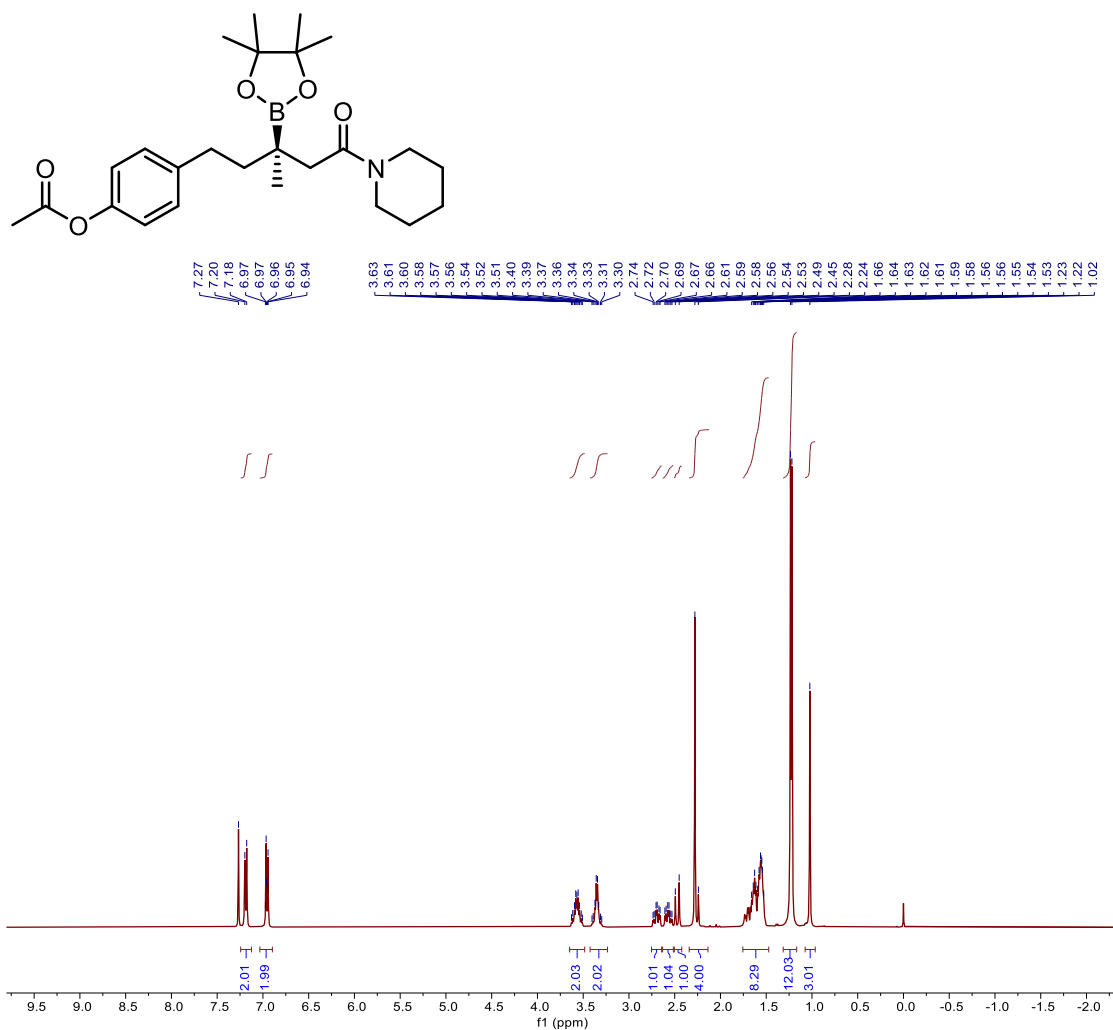

Supplementary Figure 119.  $^1\text{H}$  NMR (400 MHz,  $\text{CDCl}_3$ ) of **3t**.

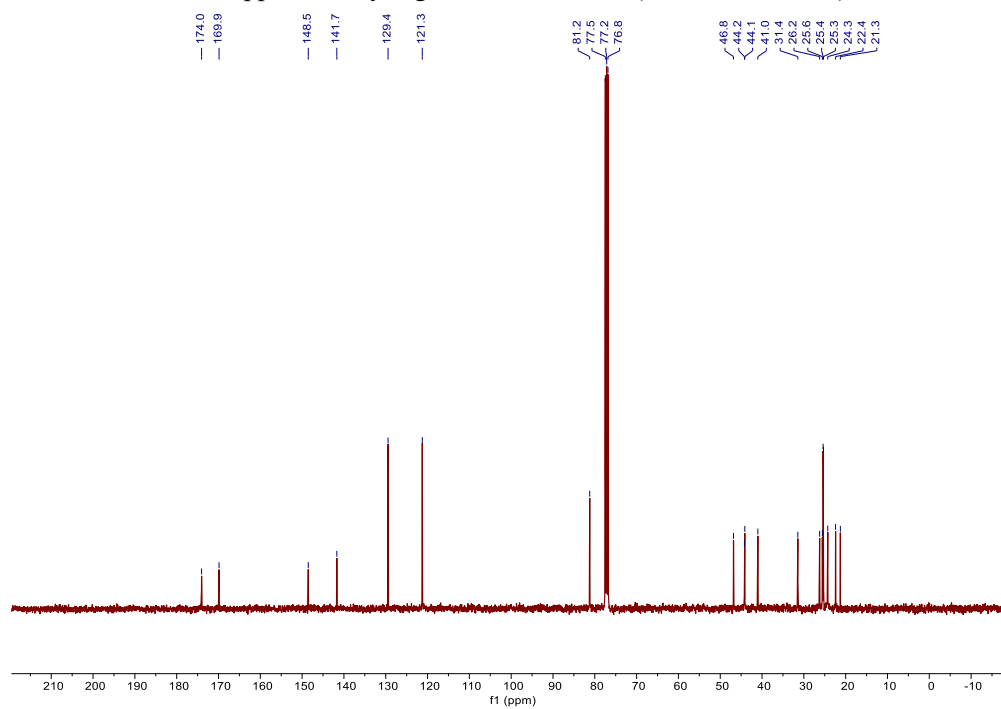

Supplementary Figure 120.  $^{13}\text{C}$  NMR (101 MHz,  $\text{CDCl}_3$ ) of **3t**.

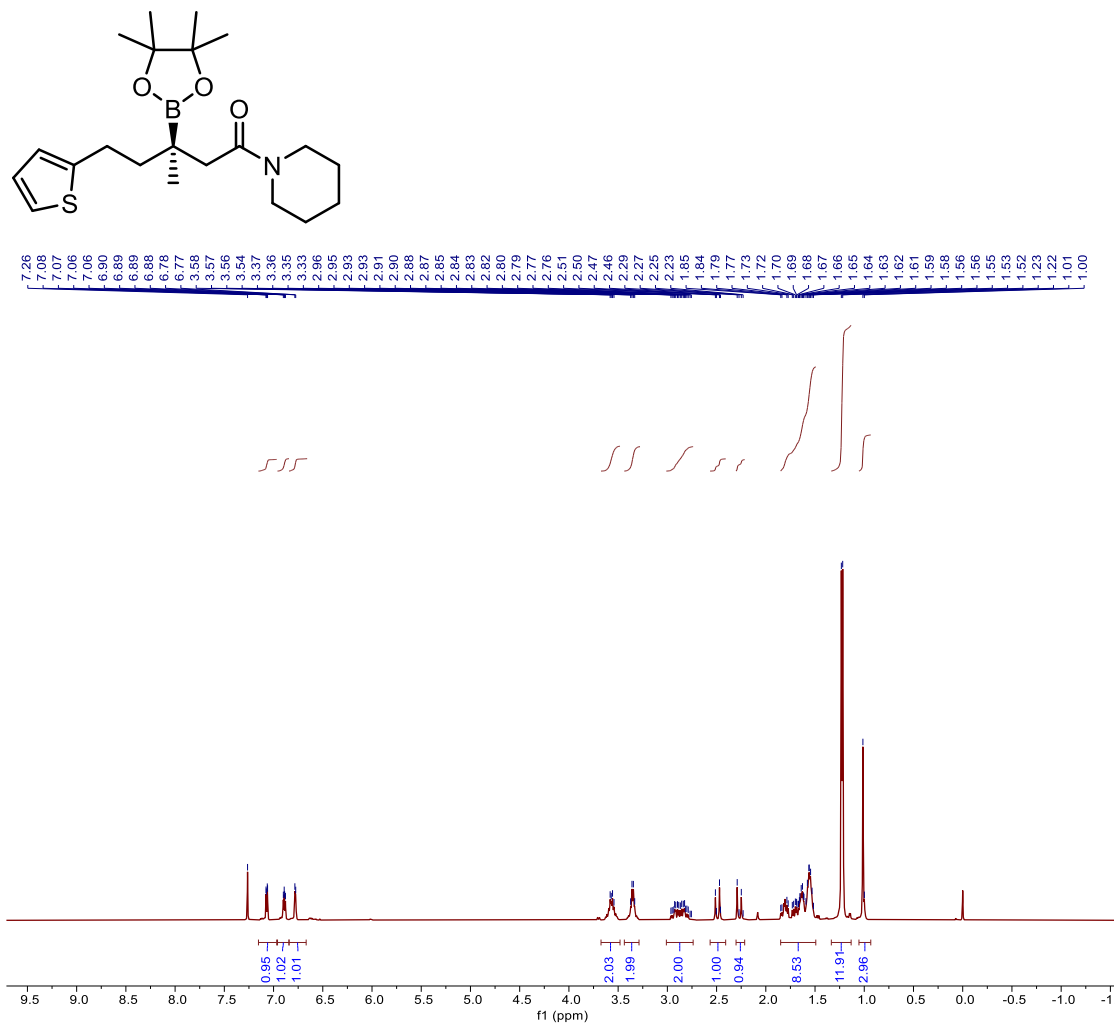

Supplementary Figure 121.  $^1\text{H}$  NMR (400 MHz,  $\text{CDCl}_3$ ) of **3u**.

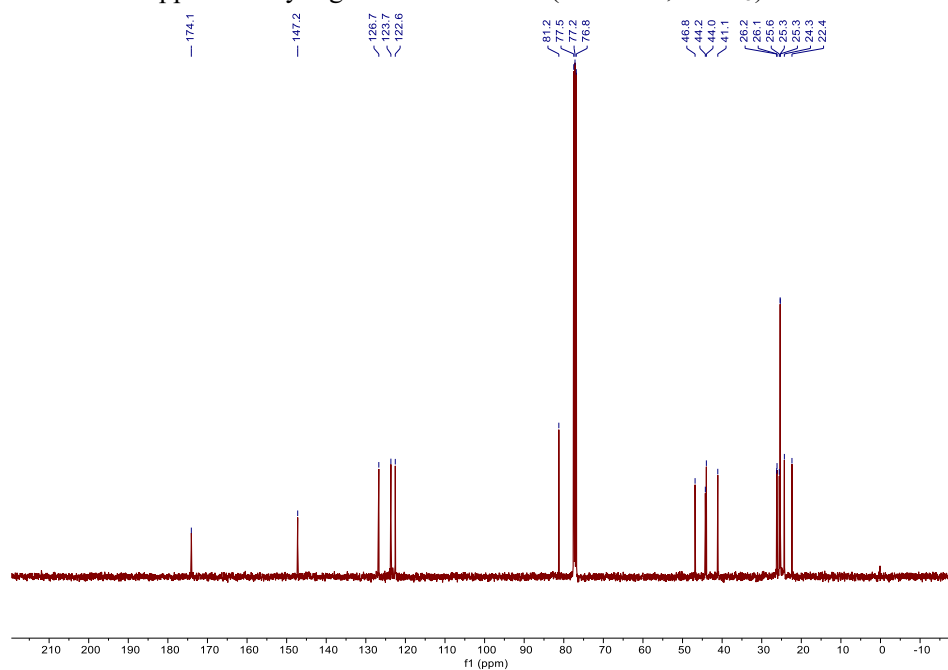

Supplementary Figure 122.  $^{13}\text{C}$  NMR (101 MHz,  $\text{CDCl}_3$ ) of **3u**.

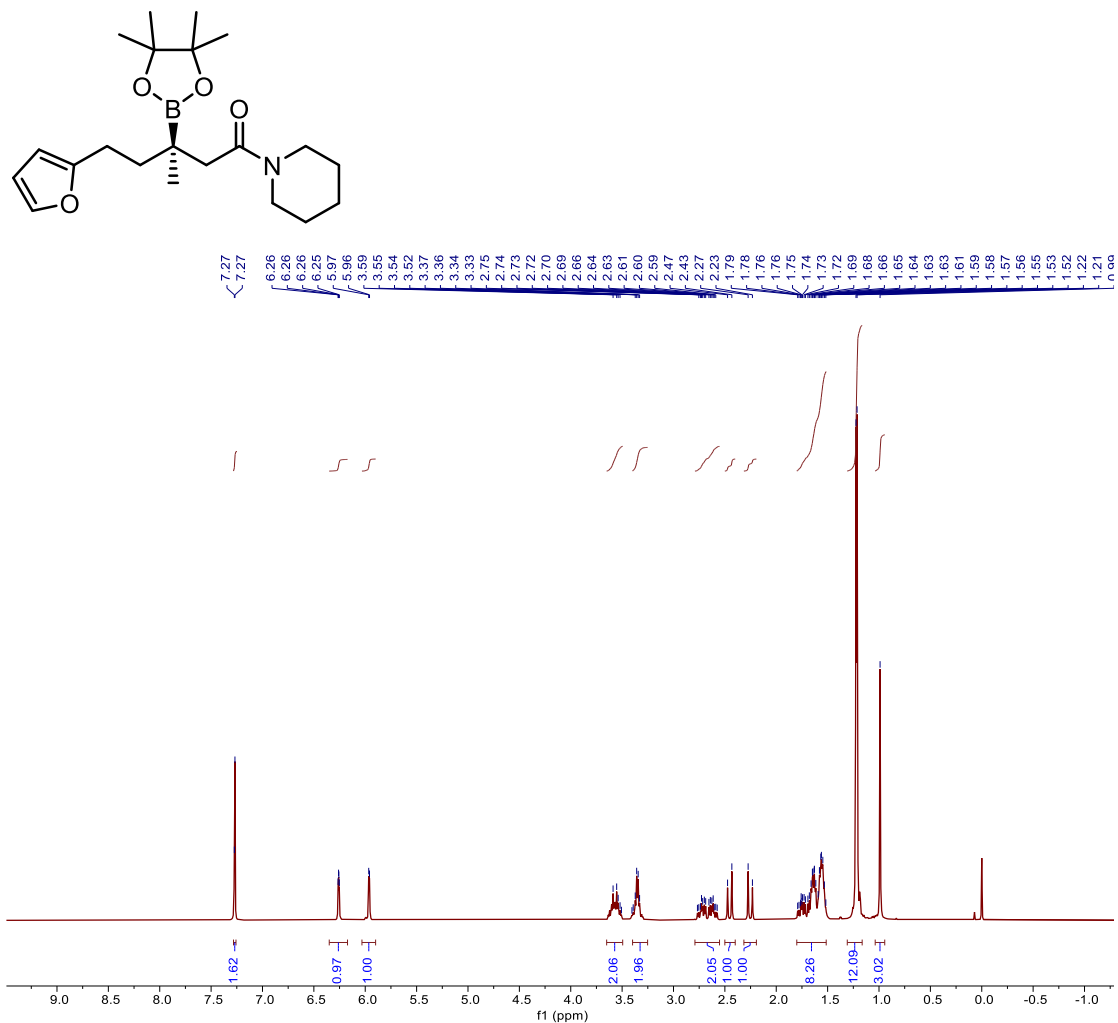

Supplementary Figure 123.  $^1\text{H}$  NMR (400 MHz,  $\text{CDCl}_3$ ) of **3v**.

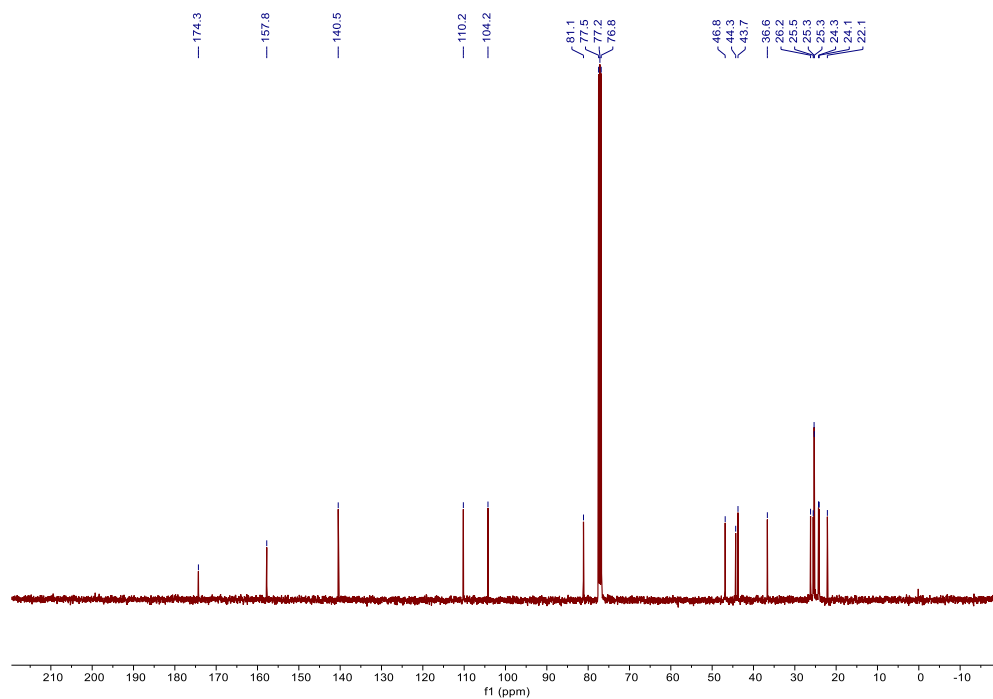

Supplementary Figure 124.  $^{13}\text{C}$  NMR (101 MHz,  $\text{CDCl}_3$ ) of **3v**.



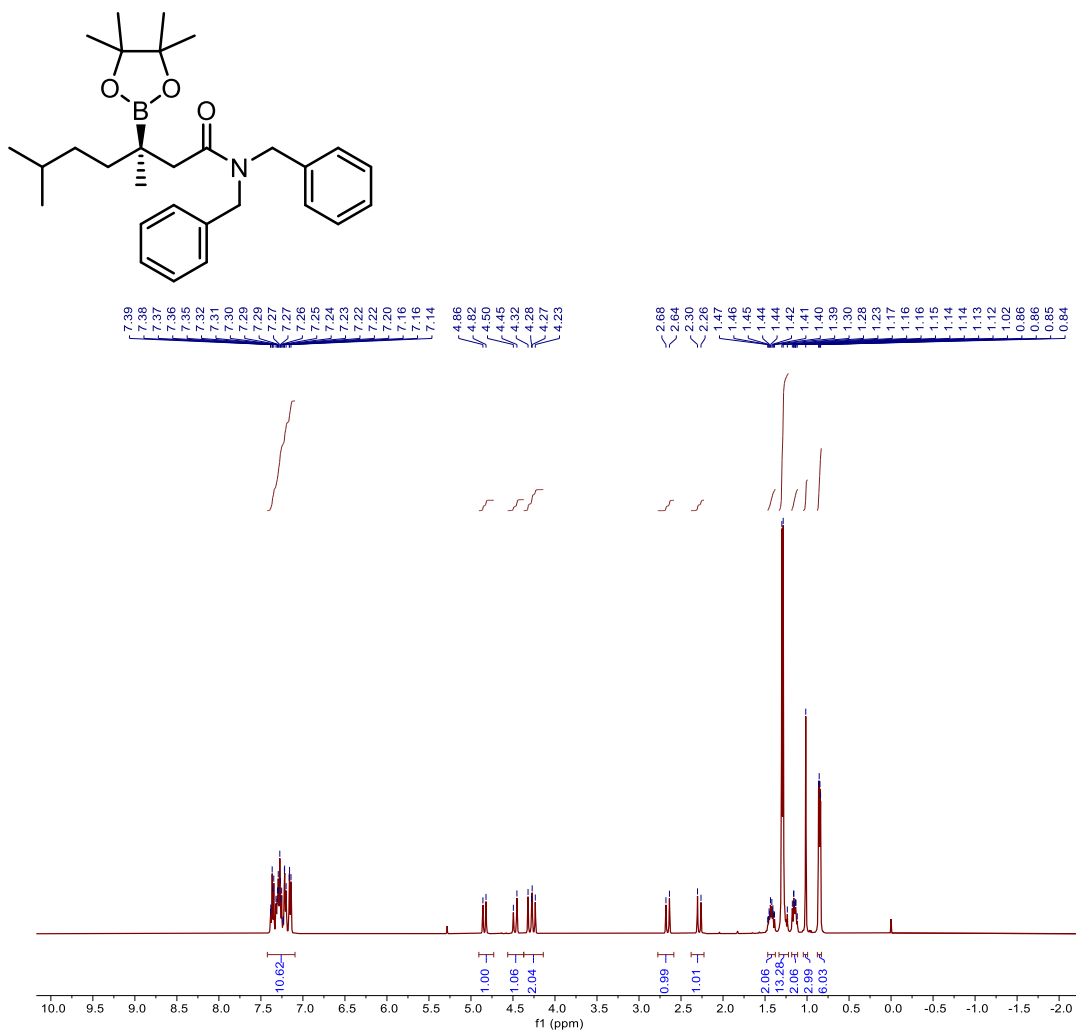

Supplementary Figure 125.  $^1\text{H}$  NMR (400 MHz,  $\text{CDCl}_3$ ) of **3w**.

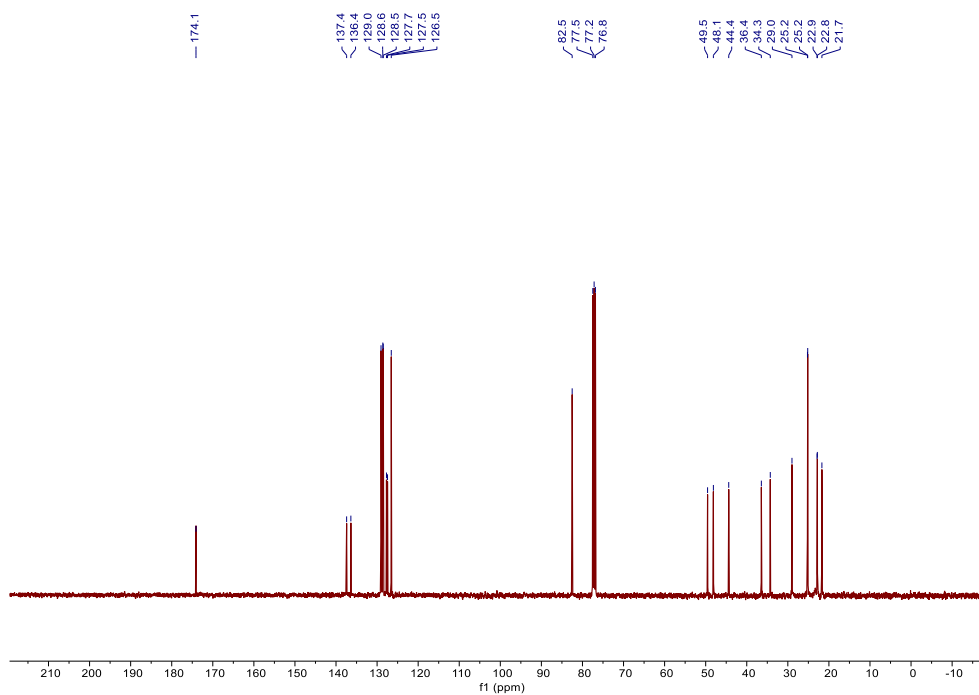

Supplementary Figure 126.  $^{13}\text{C}$  NMR (101 MHz,  $\text{CDCl}_3$ ) of **3w**.



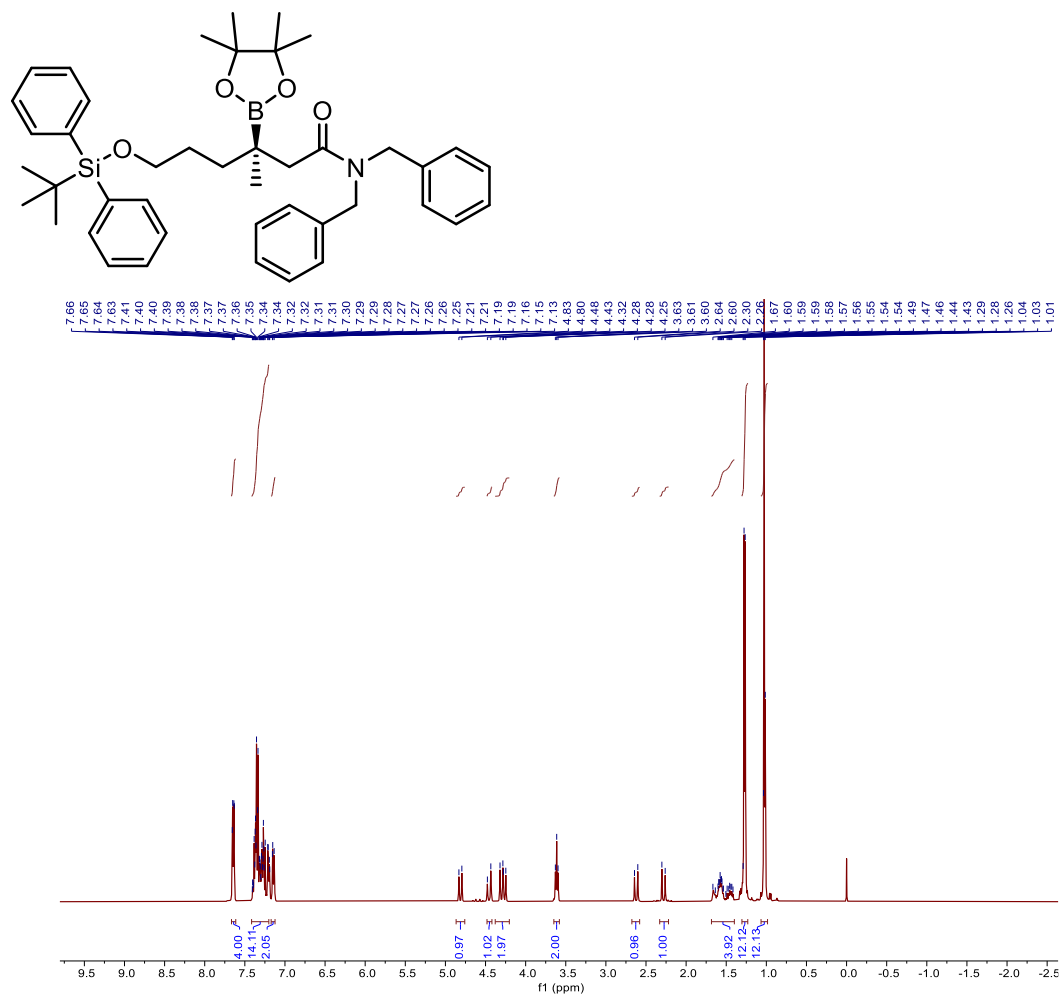

Supplementary Figure 129.  $^1\text{H}$  NMR (400 MHz,  $\text{CDCl}_3$ ) of **3y**.

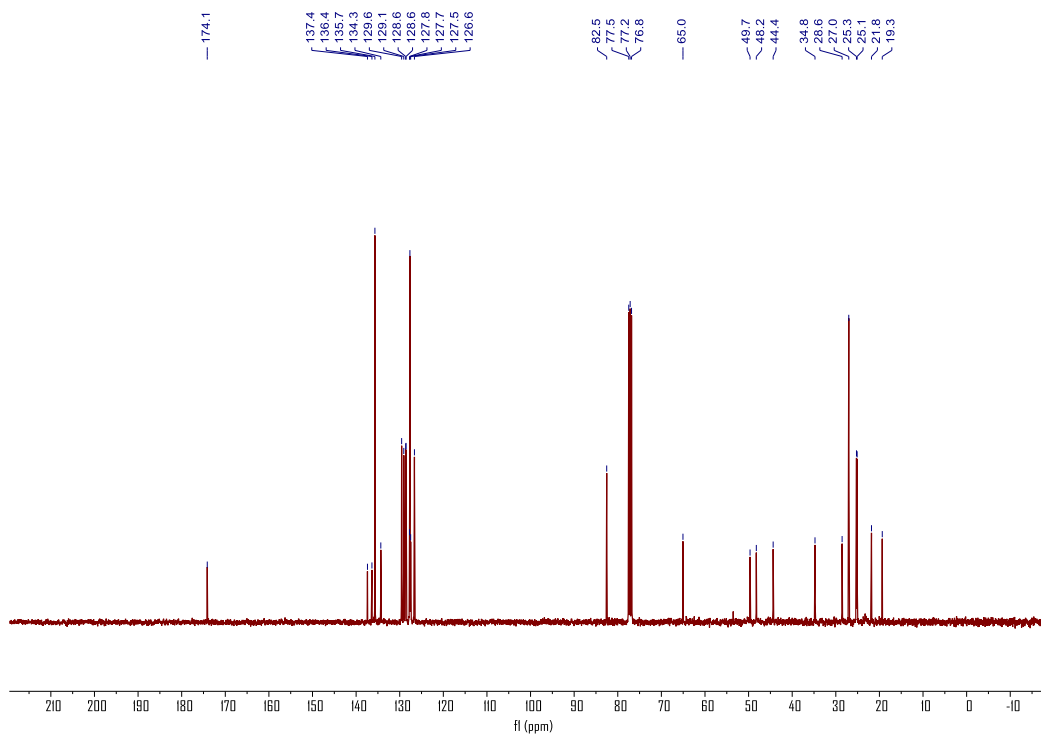

Supplementary Figure 130.  $^{13}\text{C}$  NMR (101 MHz,  $\text{CDCl}_3$ ) of **3y**.

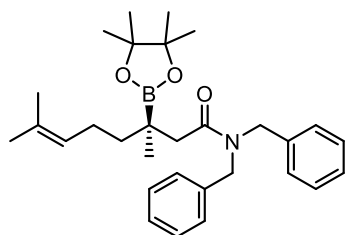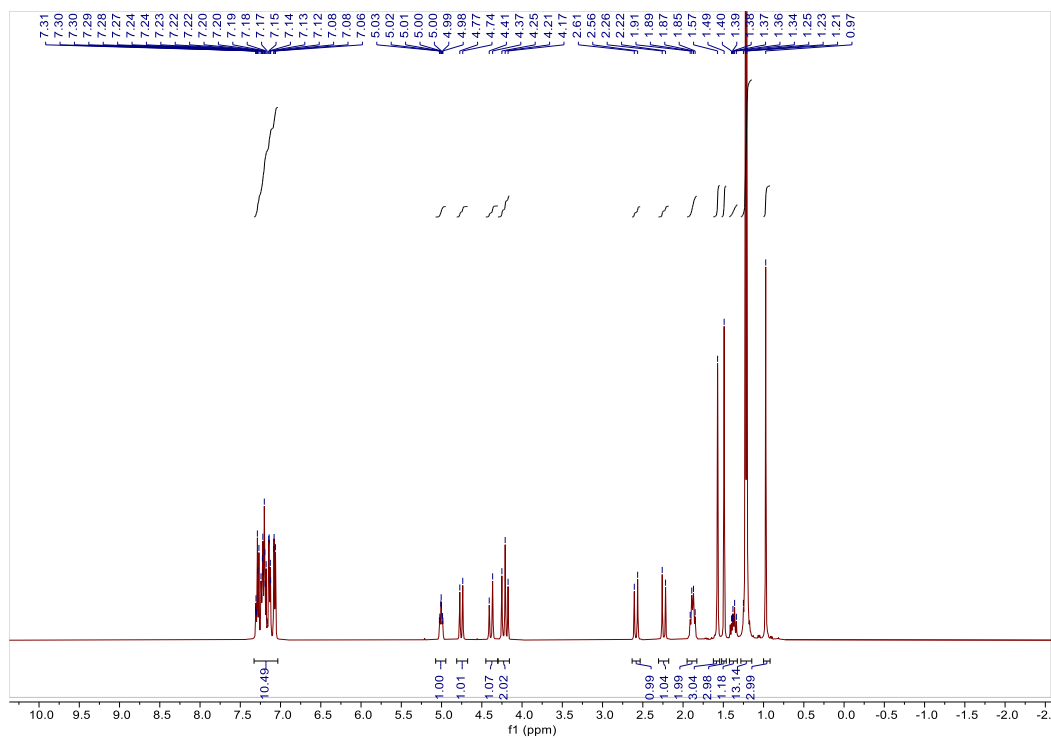

Supplementary Figure 131.  $^1\text{H}$  NMR (400 MHz,  $\text{CDCl}_3$ ) of **3z**.

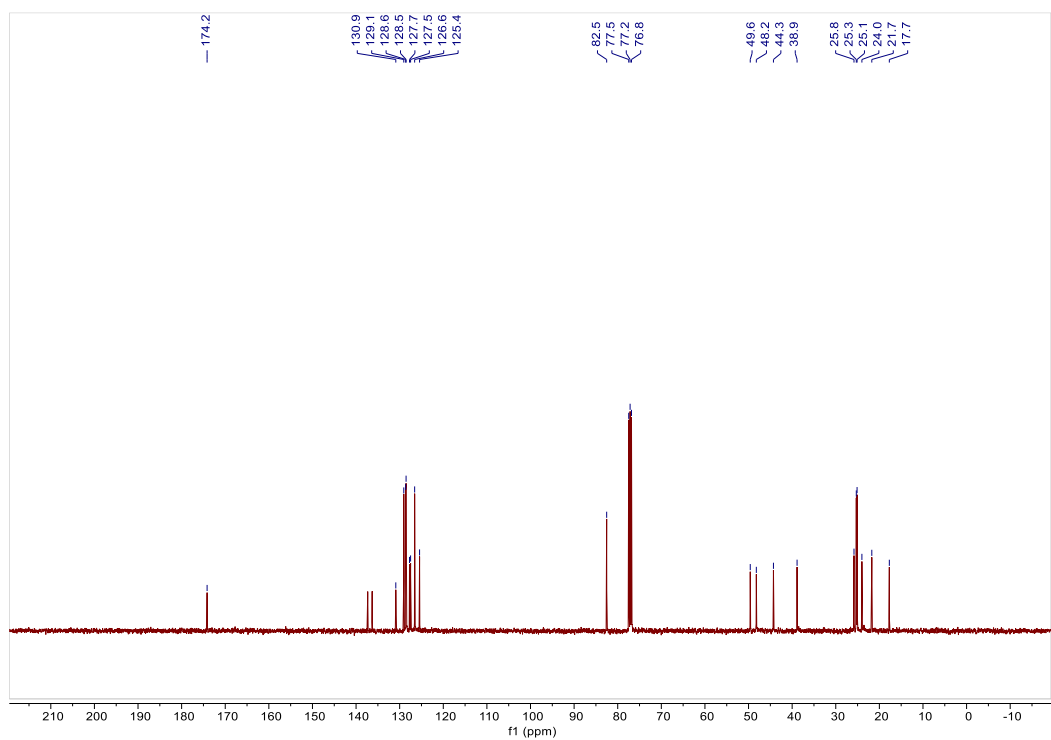

Supplementary Figure 132.  $^{13}\text{C}$  NMR (101 MHz,  $\text{CDCl}_3$ ) of **3z**.



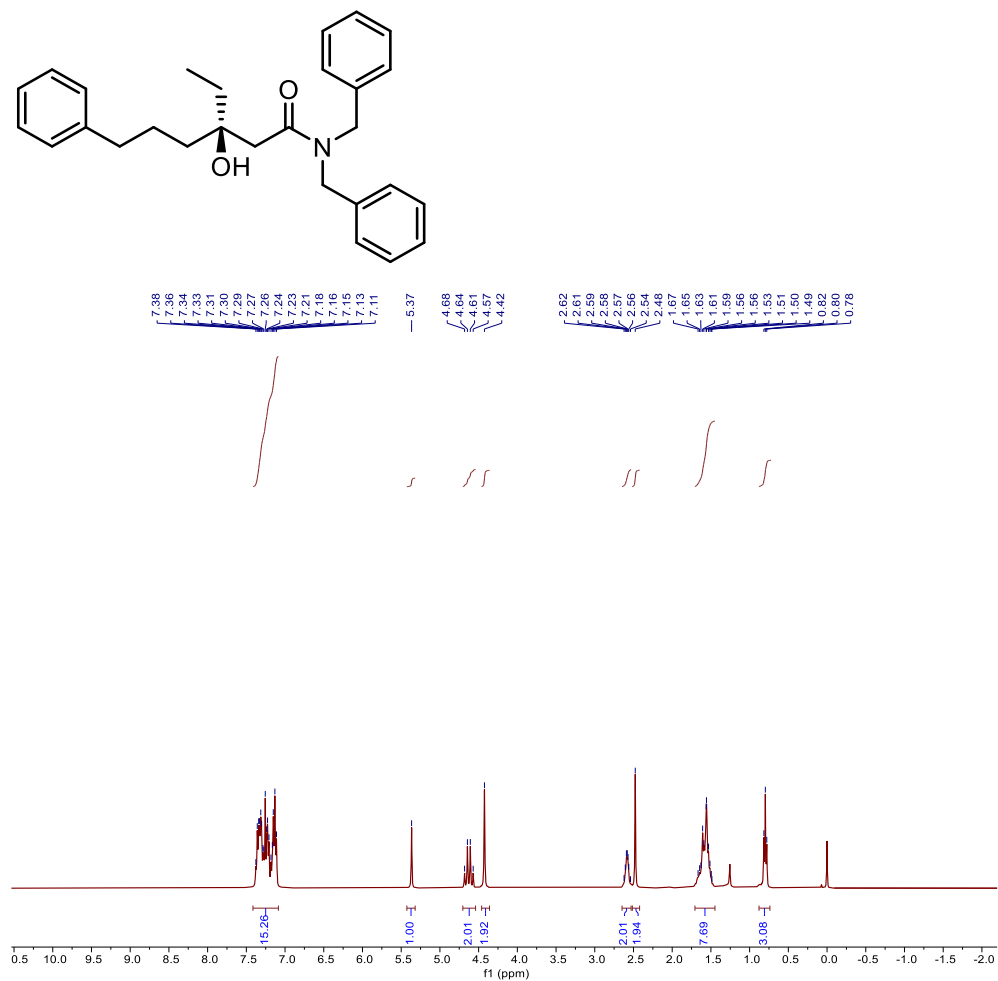

Supplementary Figure 135. <sup>1</sup>H NMR (400 MHz, CDCl<sub>3</sub>) of **3ab-ol**.

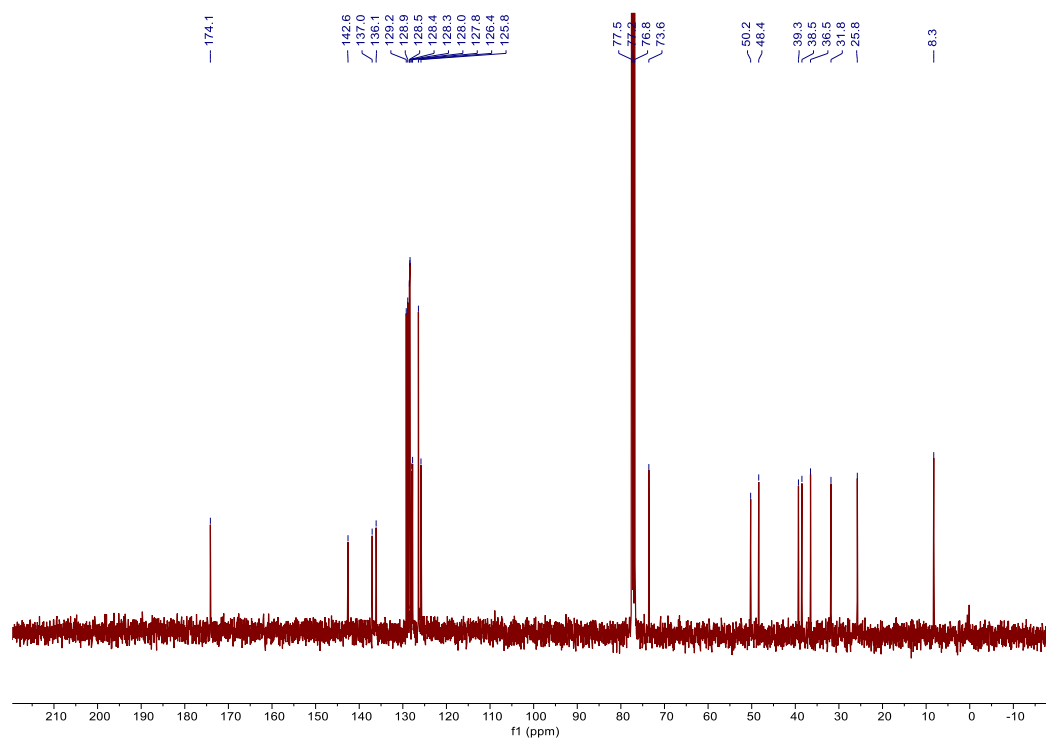

Supplementary Figure 136. <sup>13</sup>C NMR (101 MHz, CDCl<sub>3</sub>) of **3ab-ol**.

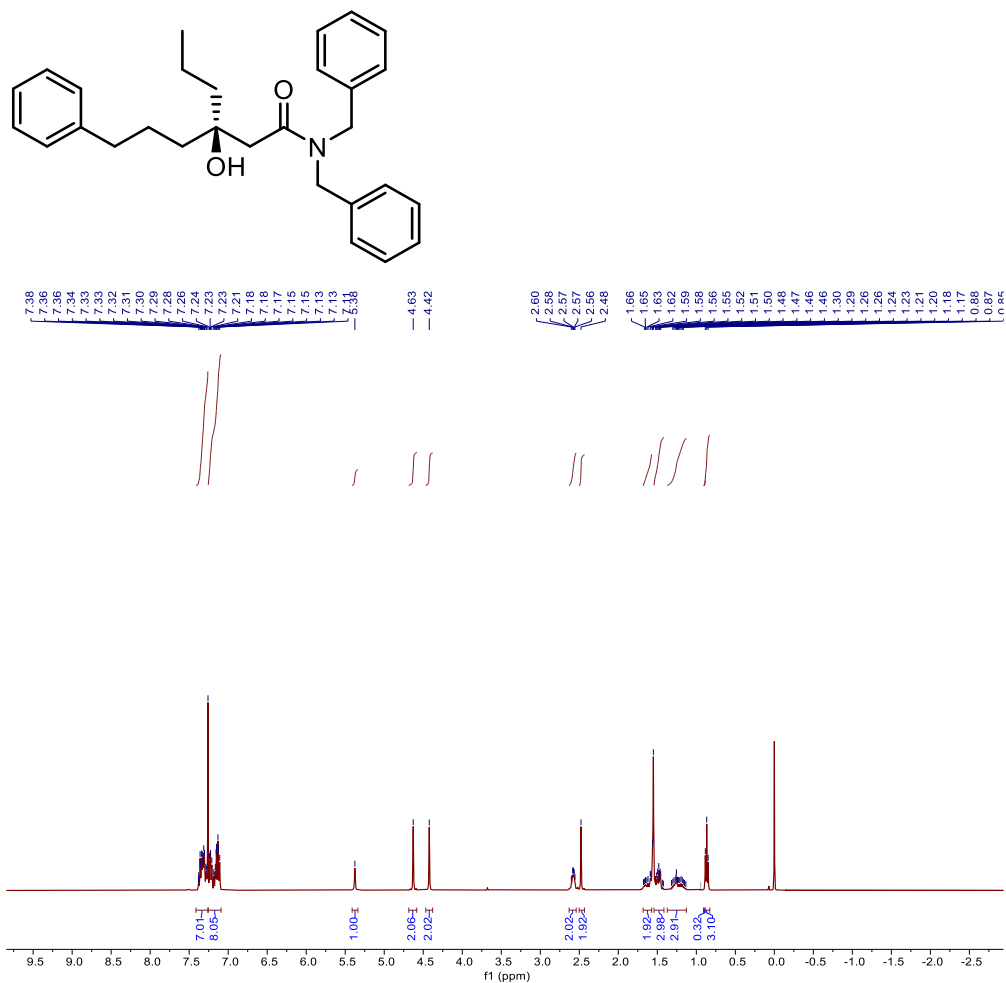

Supplementary Figure 137.  $^1\text{H}$  NMR (400 MHz,  $\text{CDCl}_3$ ) of **3ac-ol**.

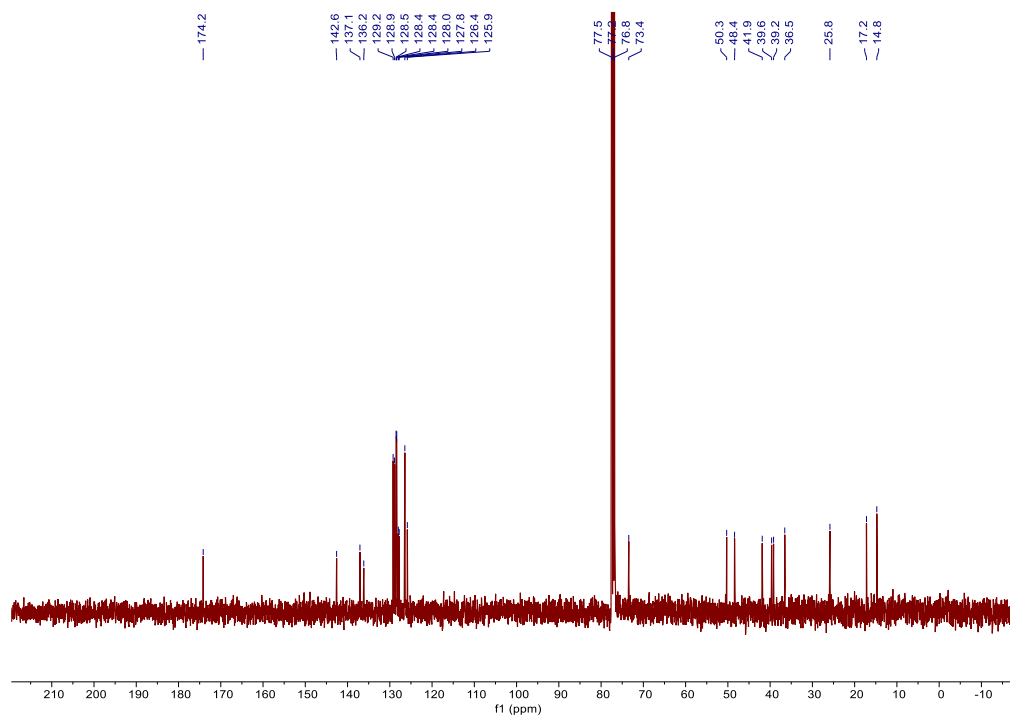

Supplementary Figure 138.  $^{13}\text{C}$  NMR (101 MHz,  $\text{CDCl}_3$ ) of **3ac-ol**.

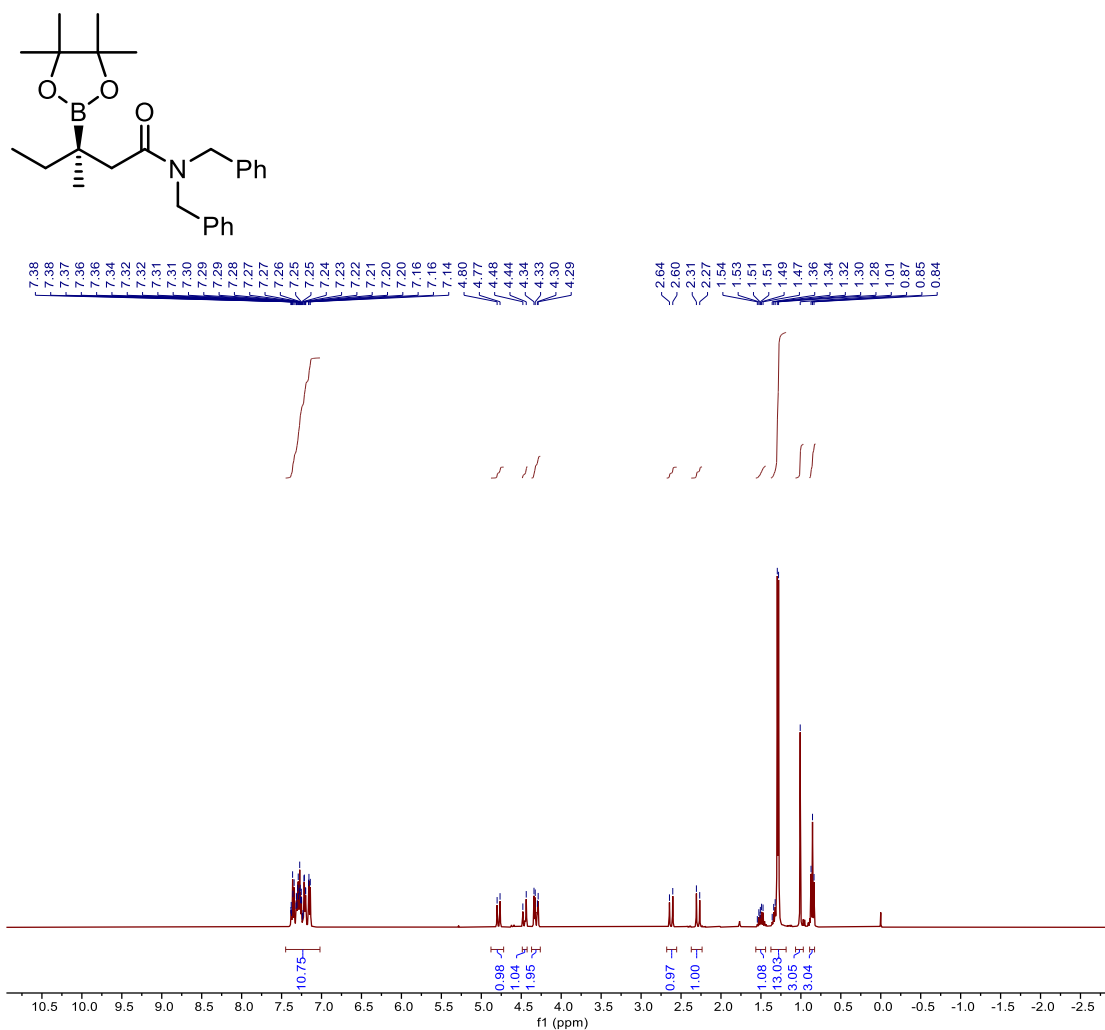

Supplementary Figure 139. <sup>1</sup>H NMR (400 MHz, CDCl<sub>3</sub>) of 3ad.

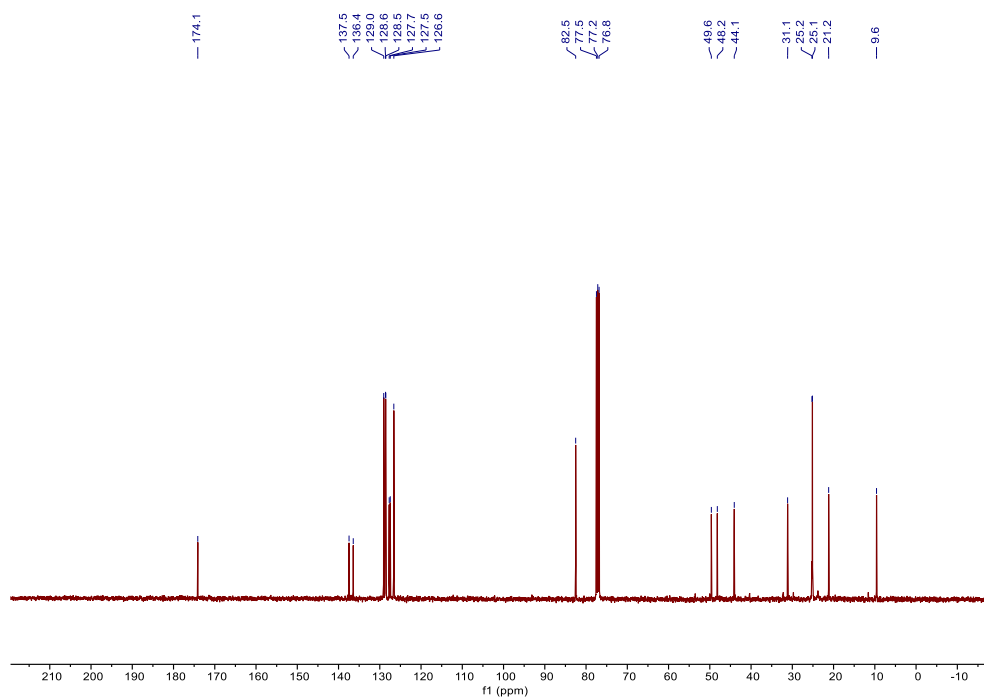

Supplementary Figure 140. <sup>13</sup>C NMR (101 MHz, CDCl<sub>3</sub>) of 3ad.



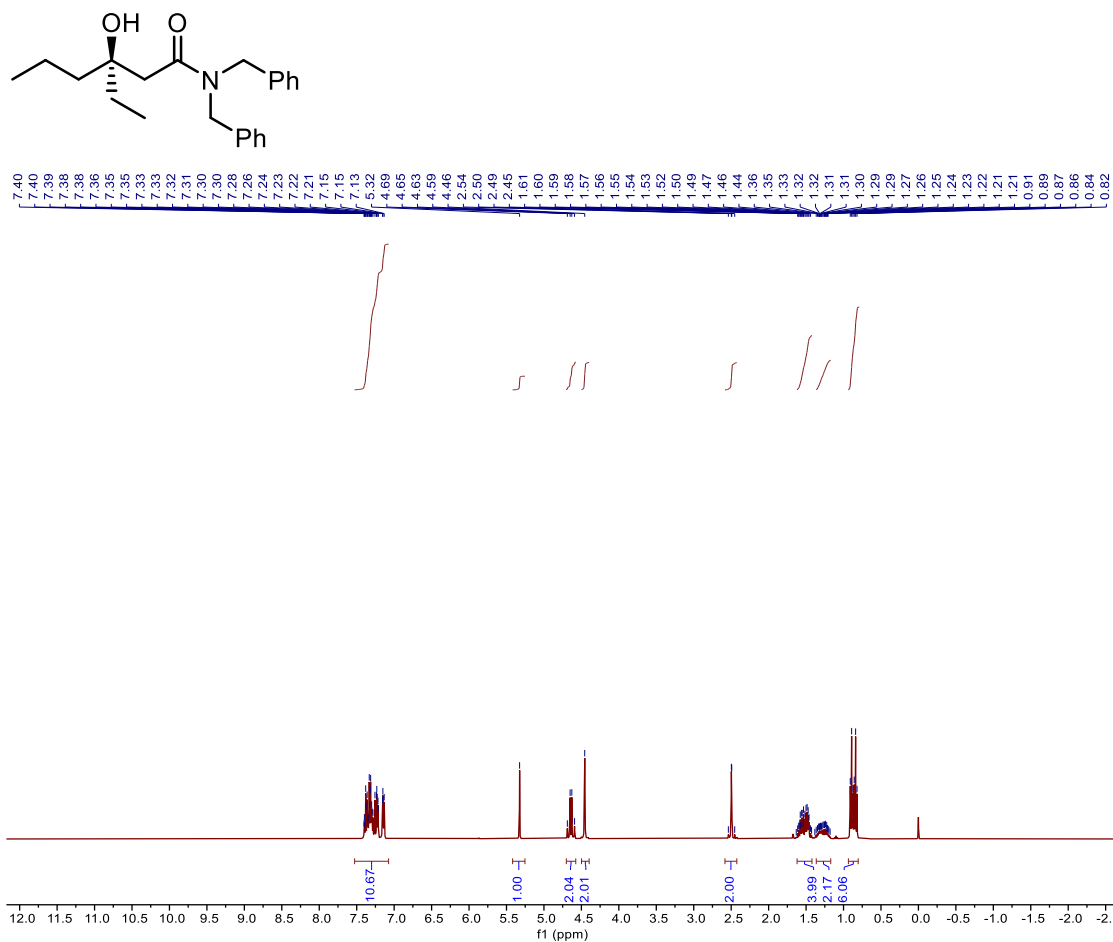

Supplementary Figure 141.  $^1\text{H NMR}$  (400 MHz,  $\text{CDCl}_3$ ) of **3ae-ol**.

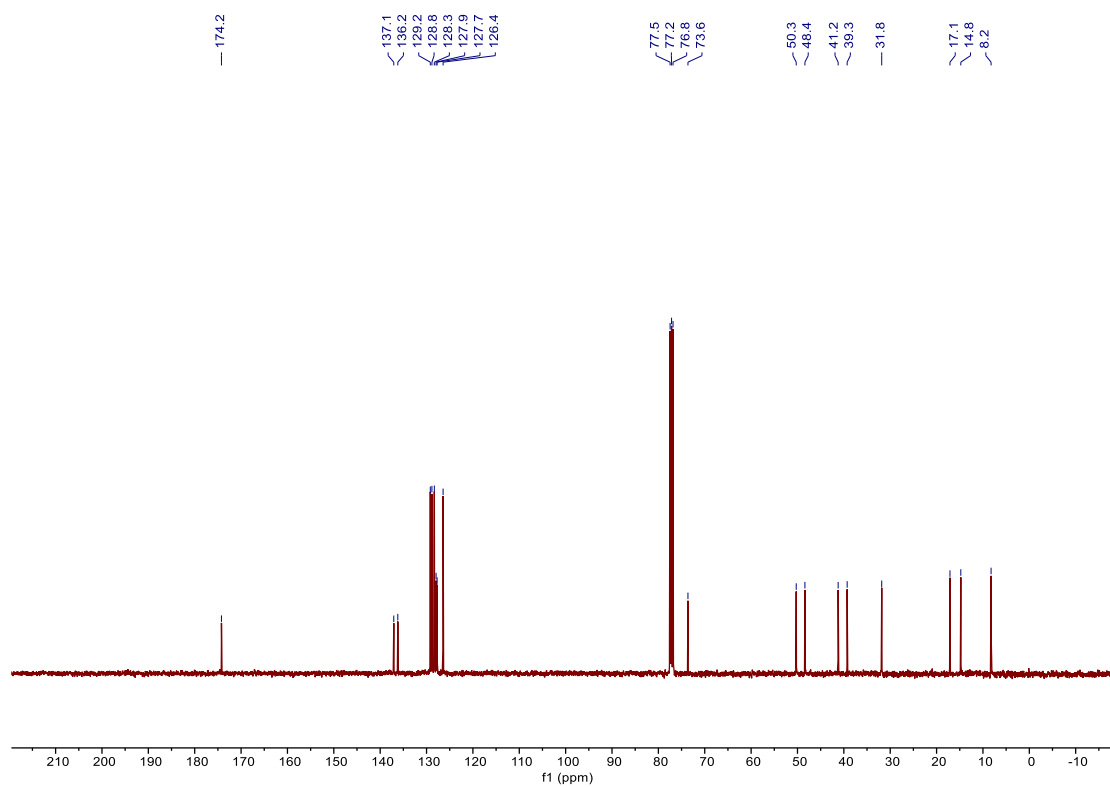

Supplementary Figure 142.  $^{13}\text{C NMR}$  (101 MHz,  $\text{CDCl}_3$ ) of **3ae-ol**.

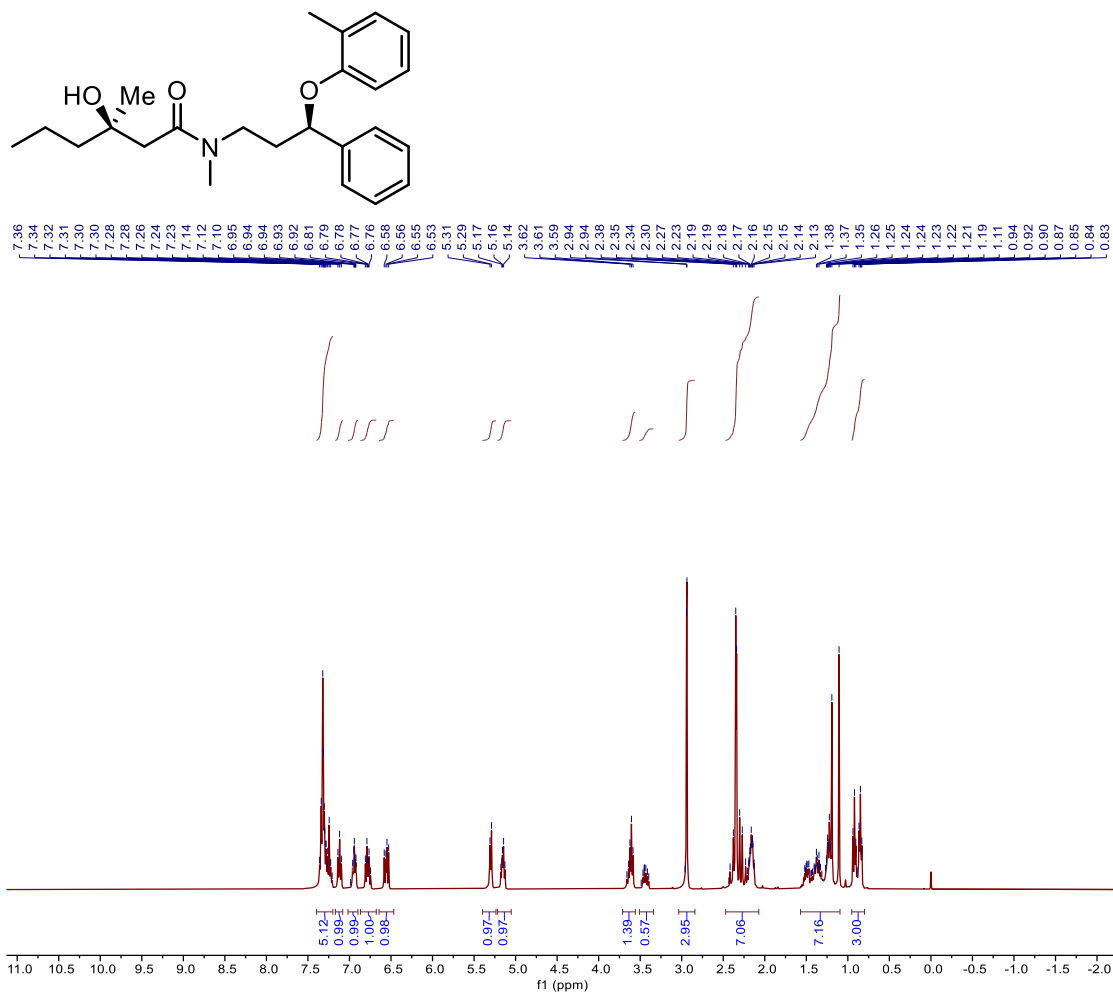

Supplementary Figure 143.  $^1\text{H}$  NMR (400 MHz,  $\text{CDCl}_3$ ) of **3ah-ol**.

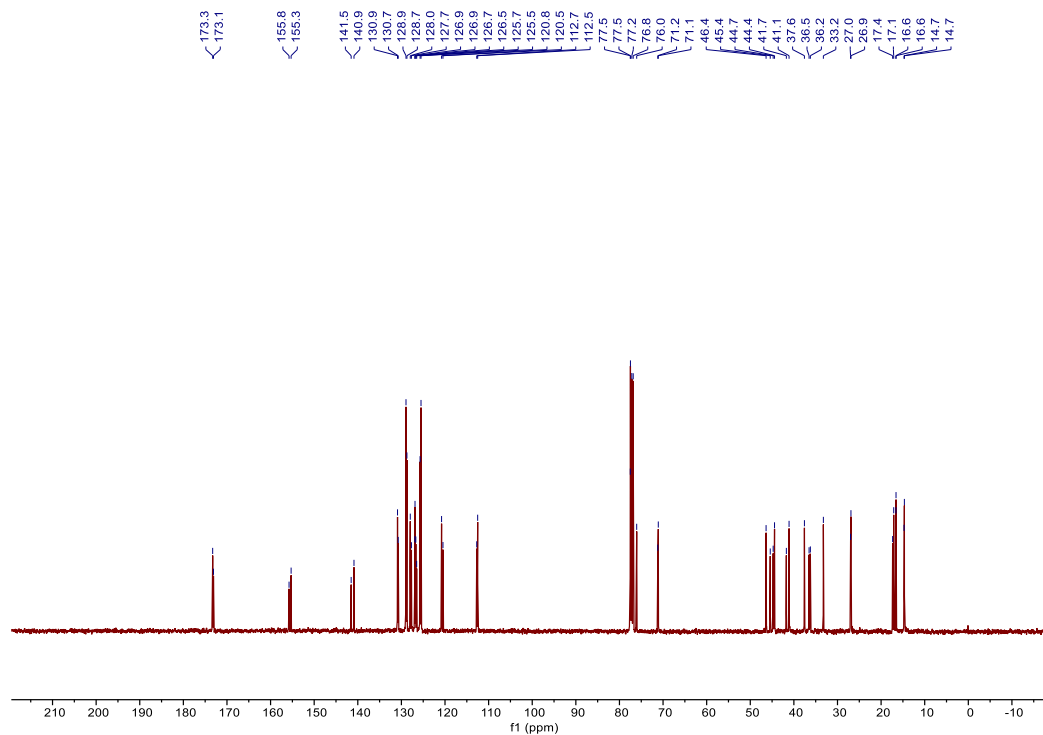

Supplementary Figure 144.  $^{13}\text{C}$  NMR (101 MHz,  $\text{CDCl}_3$ ) of **3ah-ol**.

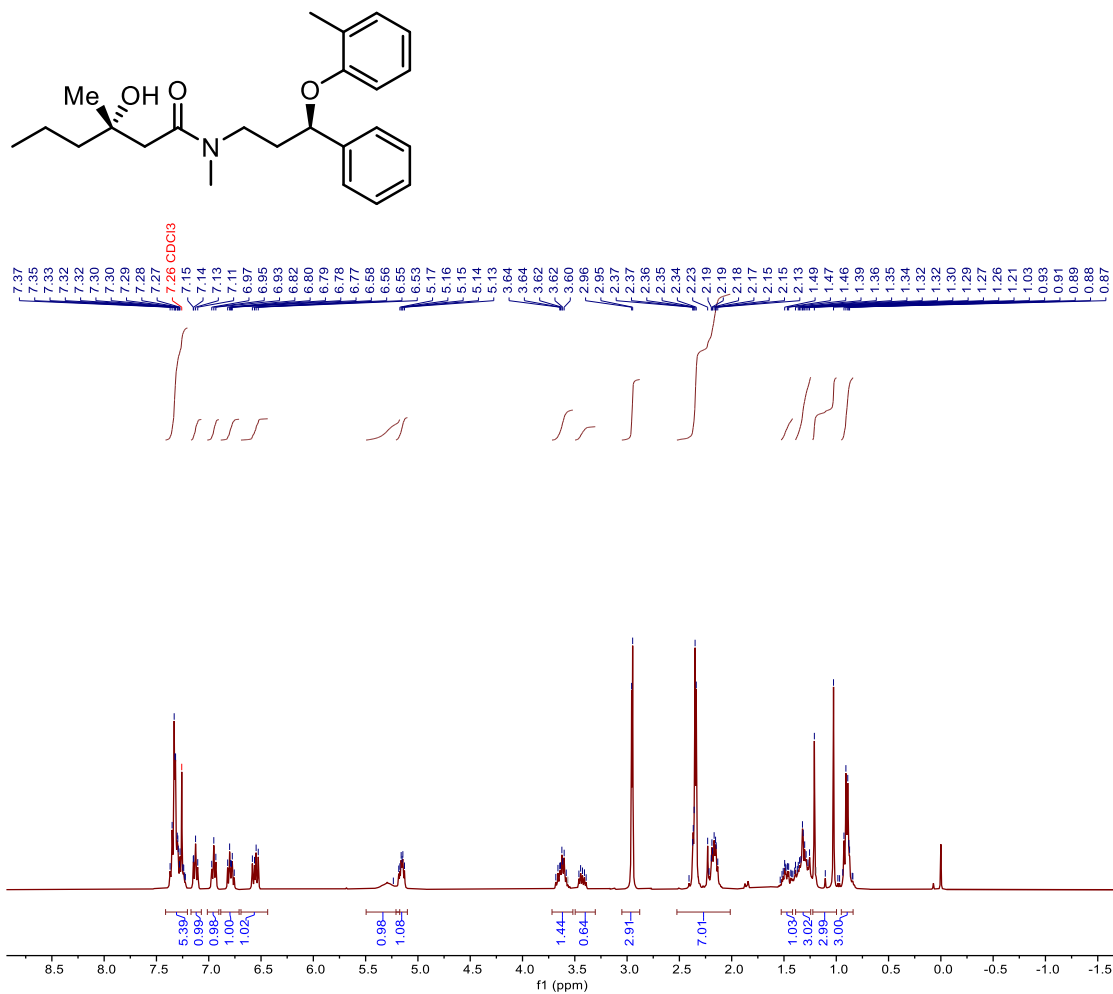

Supplementary Figure 145. <sup>1</sup>H NMR (400 MHz, CDCl<sub>3</sub>) of 3ak-ol.

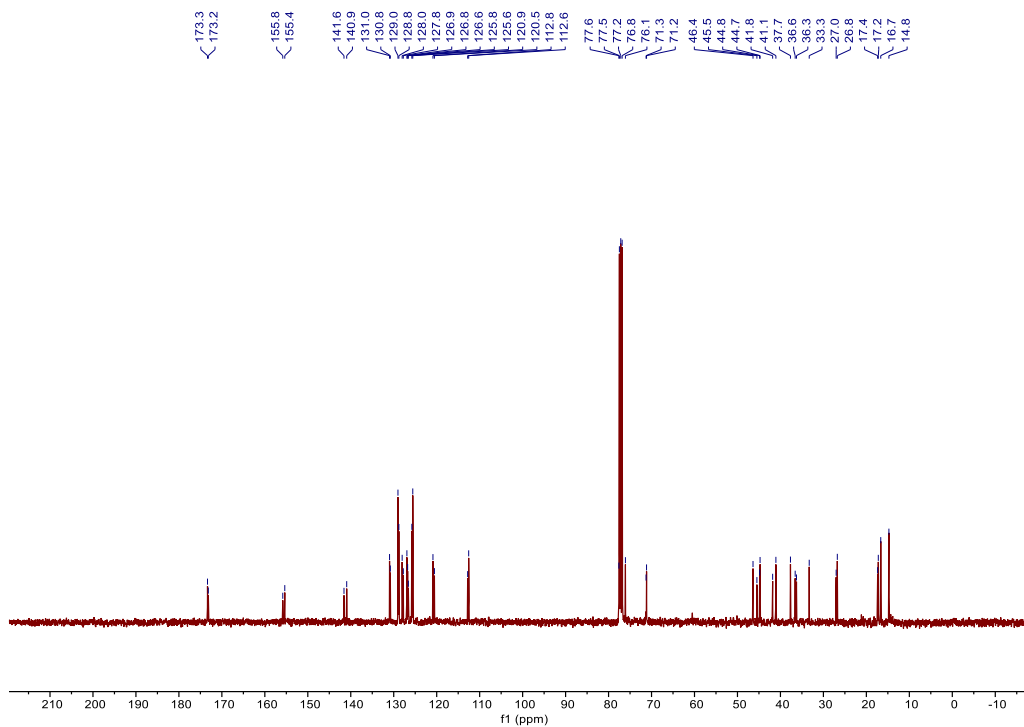

Supplementary Figure 146. <sup>13</sup>C NMR (101 MHz, CDCl<sub>3</sub>) of 3ak-ol.

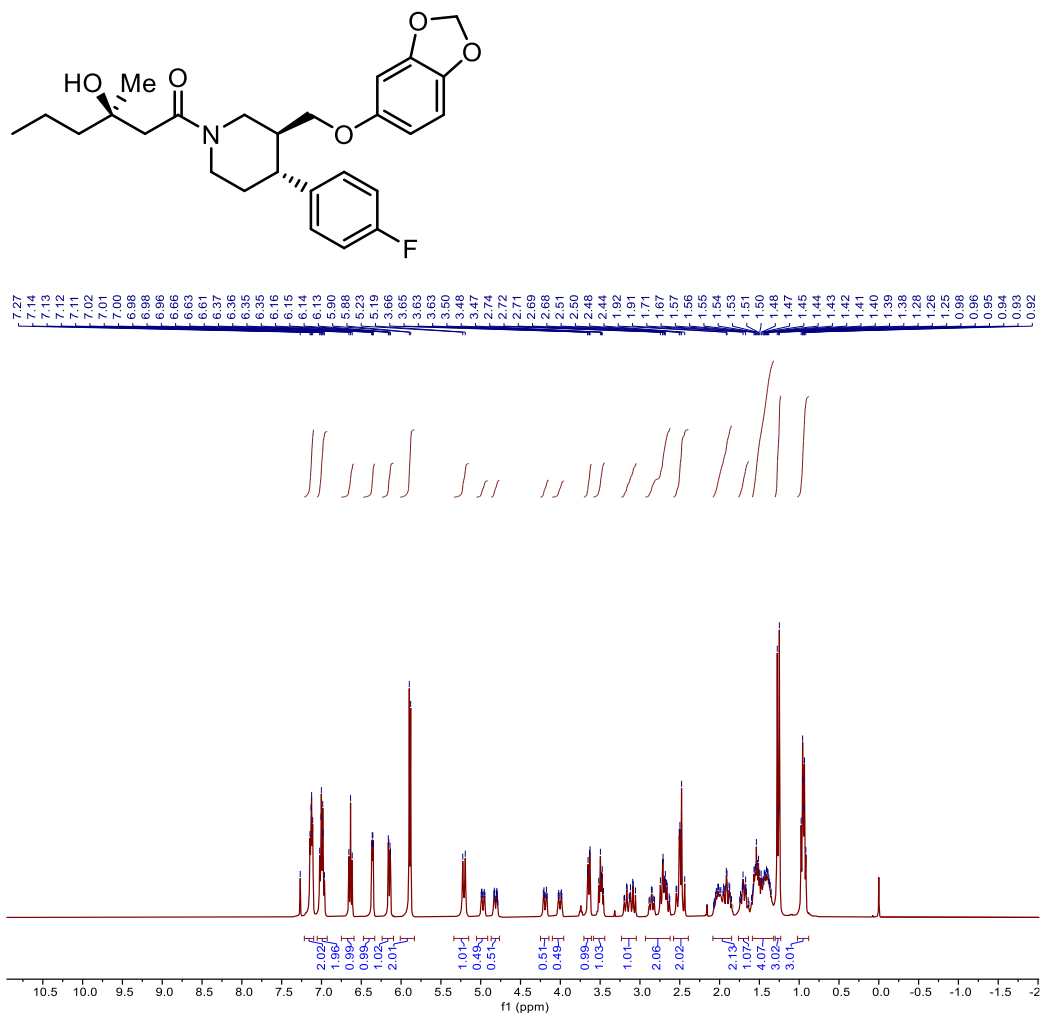

Supplementary Figure 147. <sup>1</sup>H NMR (400 MHz, CDCl<sub>3</sub>) of **3ai-ol**.

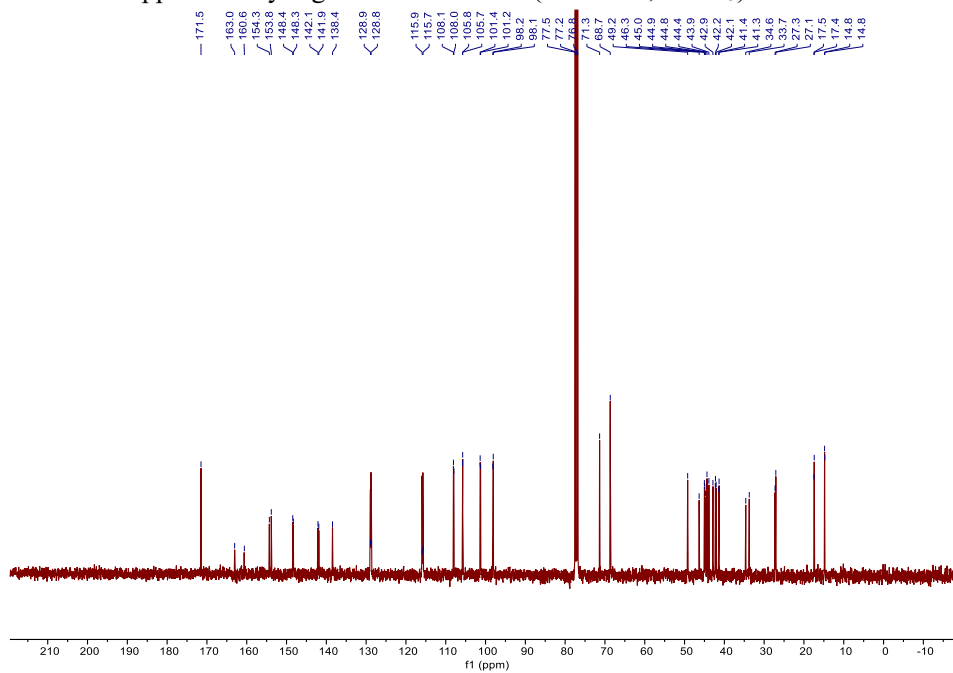

Supplementary Figure 148. <sup>13</sup>C NMR (101 MHz, CDCl<sub>3</sub>) of **3ai-ol**.

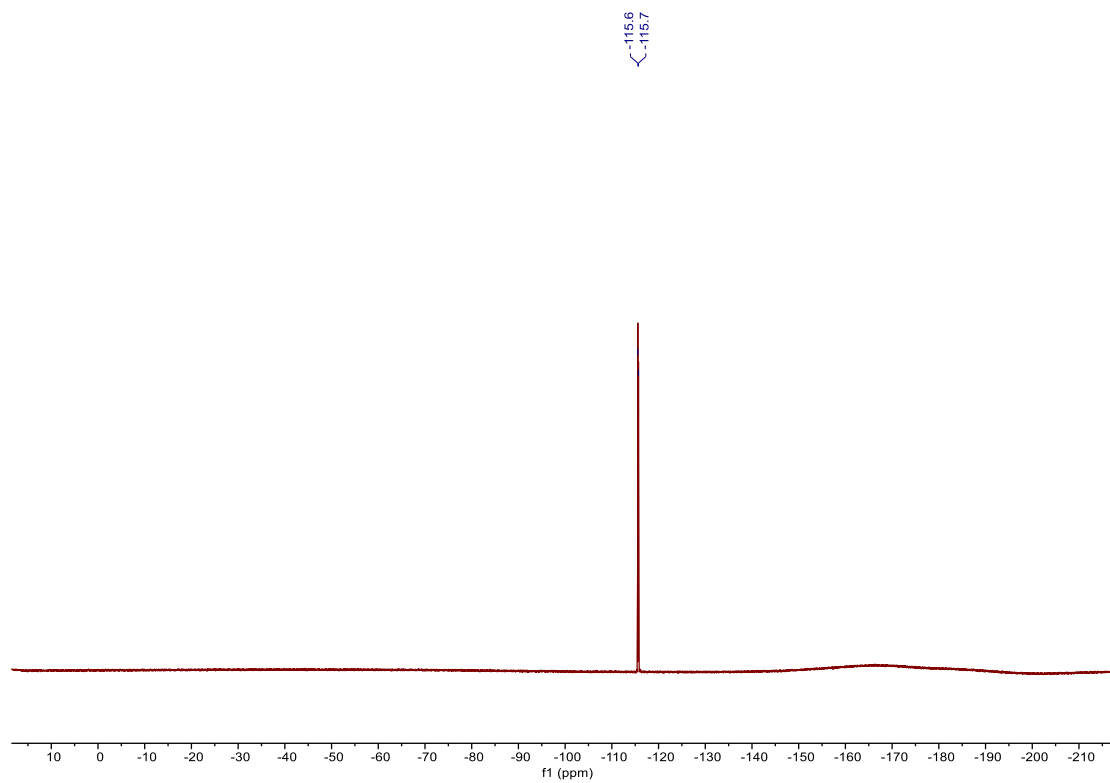

Supplementary Figure 149.  $^{19}\text{F}$  NMR (376 MHz,  $\text{CDCl}_3$ ) of **3ai-ol**.

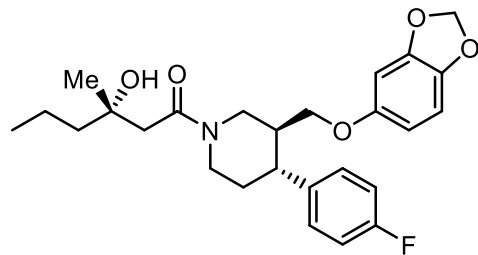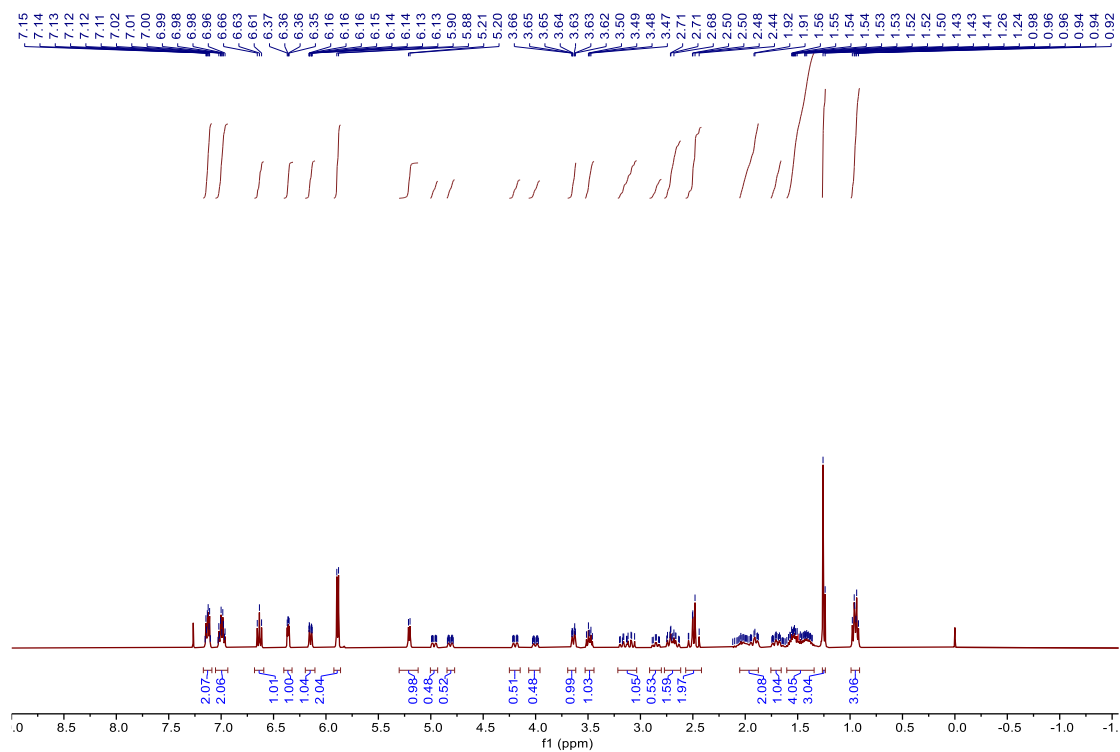

Supplementary Figure 150.  $^1\text{H}$  NMR (400 MHz,  $\text{CDCl}_3$ ) of **3al-ol**.

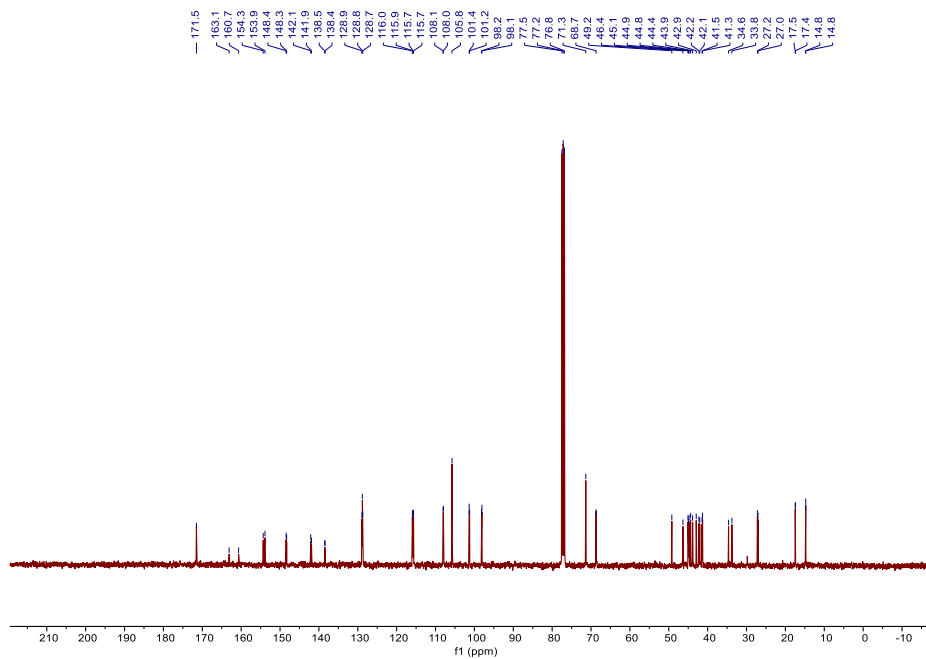

Supplementary Figure 151.  $^{13}\text{C}$  NMR (101 MHz,  $\text{CDCl}_3$ ) of **3al-ol**.

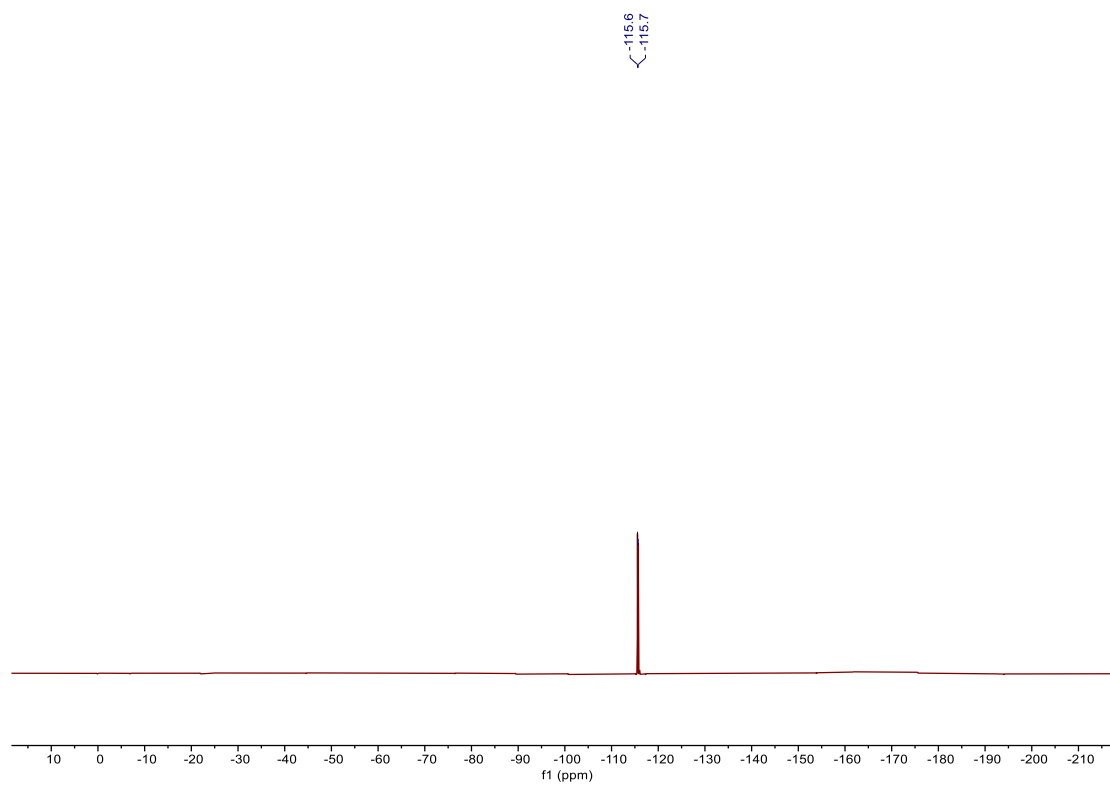

Supplementary Figure 152.  $^{19}\text{F}$  NMR (376 MHz,  $\text{CDCl}_3$ ) of **3al-ol**.

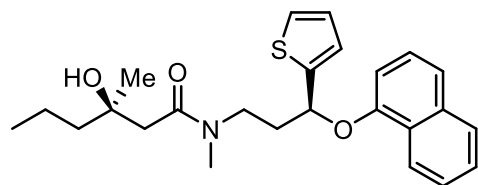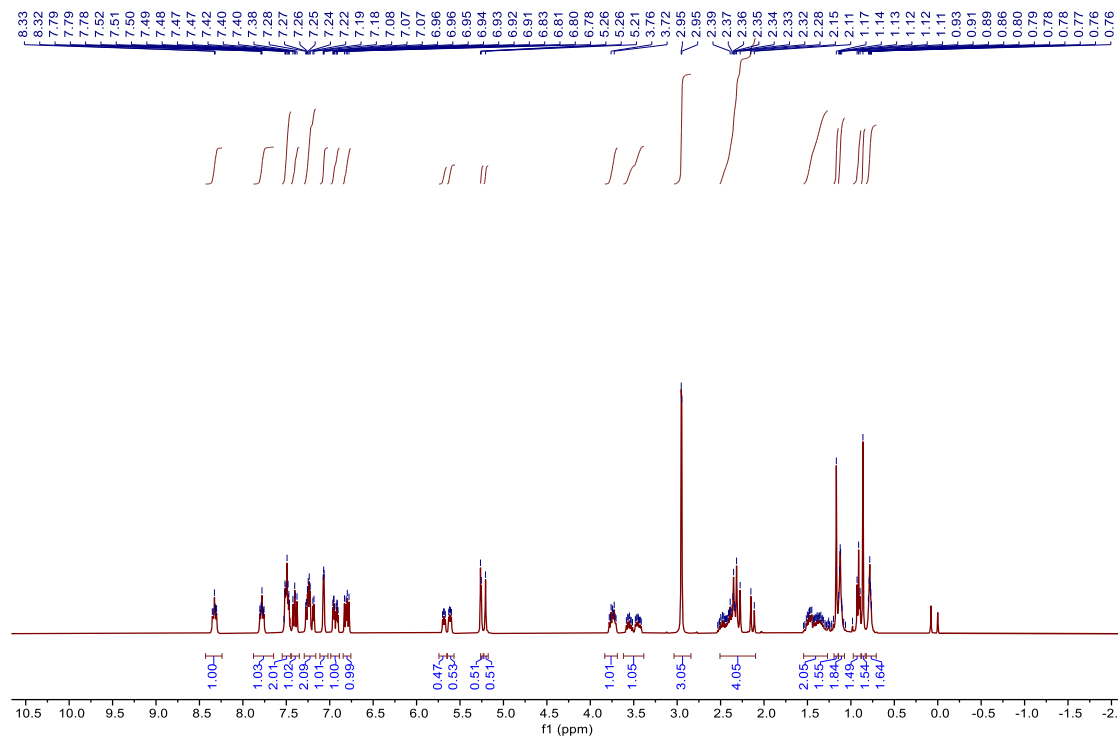

Supplementary Figure 153. <sup>1</sup>H NMR (400 MHz, CDCl<sub>3</sub>) of **3aj-ol**.

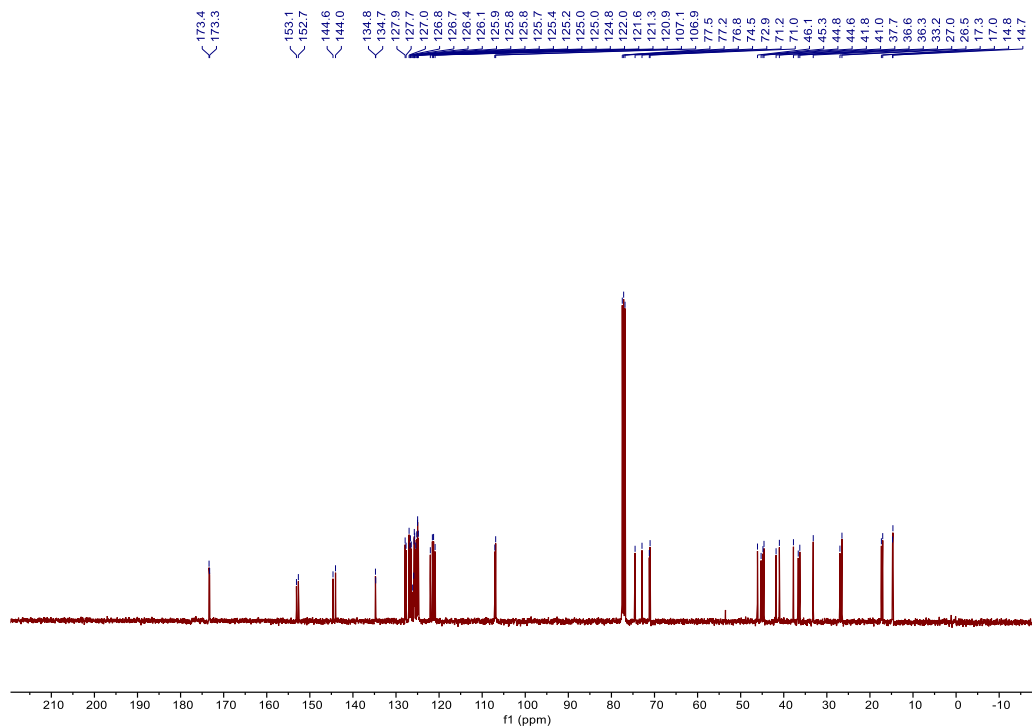

Supplementary Figure 154. <sup>13</sup>C NMR (101 MHz, CDCl<sub>3</sub>) of **3aj-ol**.



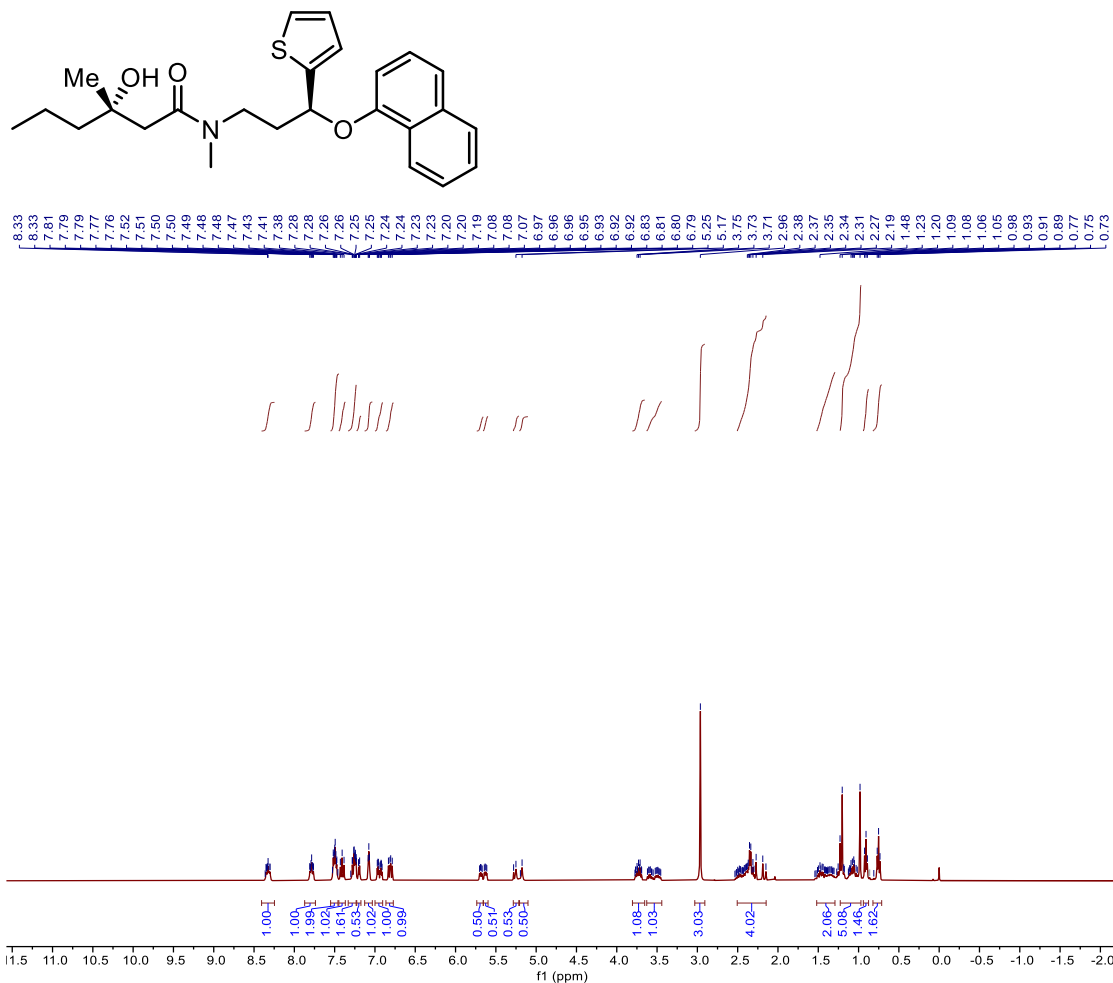

Supplementary Figure 155.  $^1\text{H}$  NMR (400 MHz,  $\text{CDCl}_3$ ) of 3am-ol.

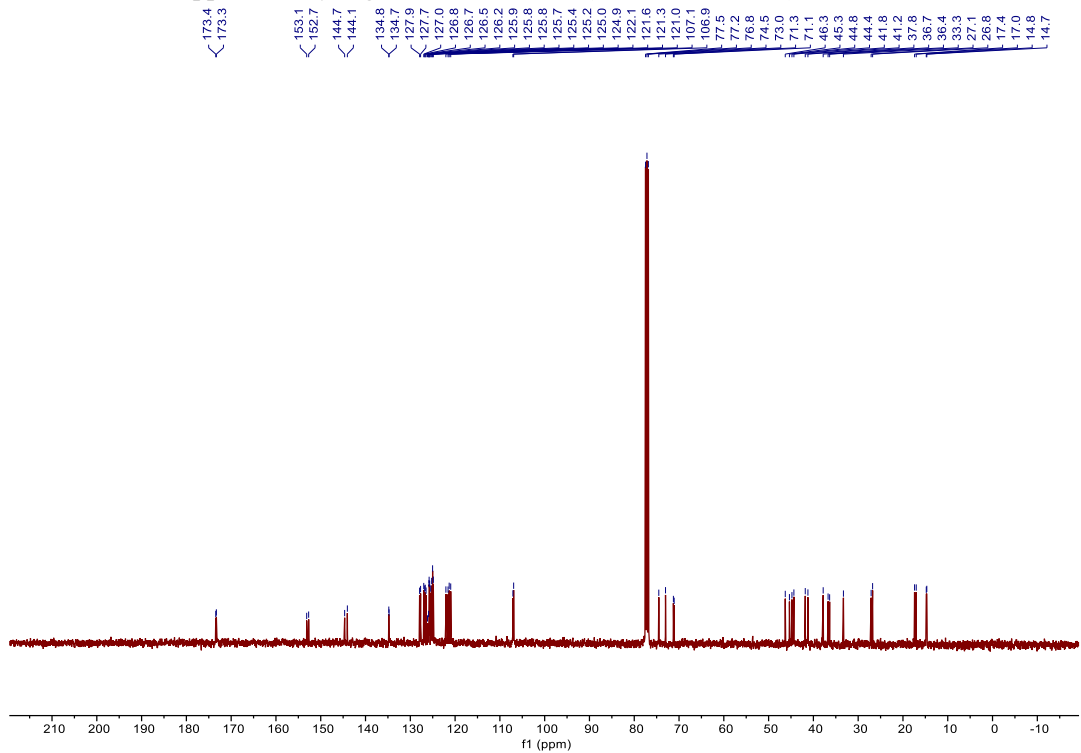

Supplementary Figure 156.  $^{13}\text{C}$  NMR (101 MHz,  $\text{CDCl}_3$ ) of 3am-ol.

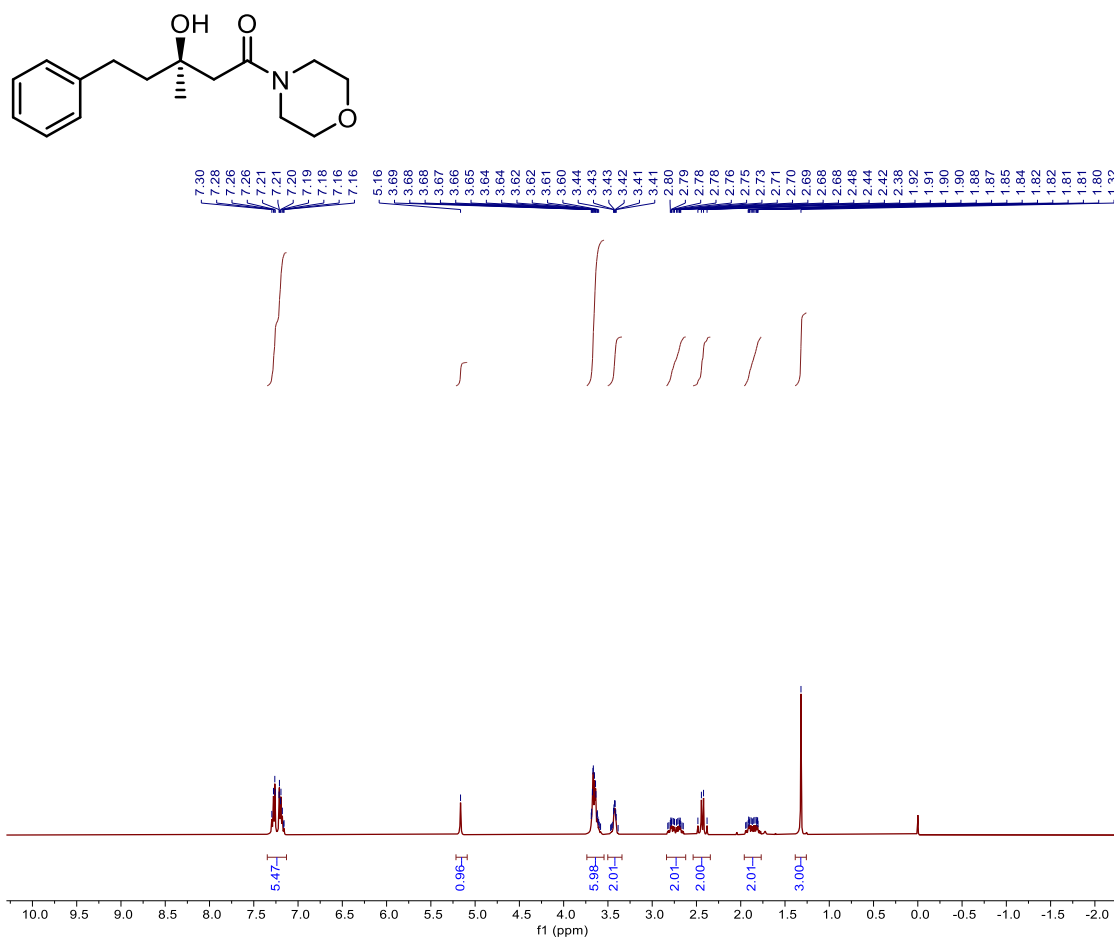

Supplementary Figure 157. <sup>1</sup>H NMR (400 MHz, CDCl<sub>3</sub>) of 4.

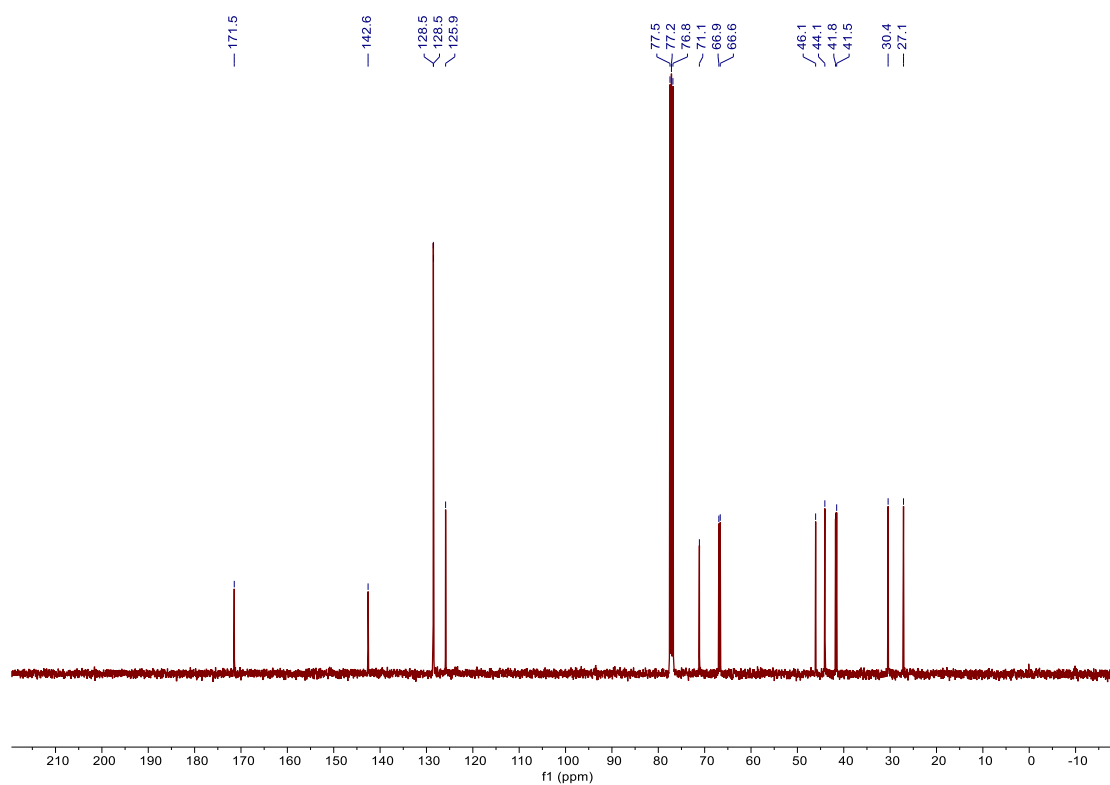

Supplementary Figure 158. <sup>13</sup>C NMR (101 MHz, CDCl<sub>3</sub>) of 4.

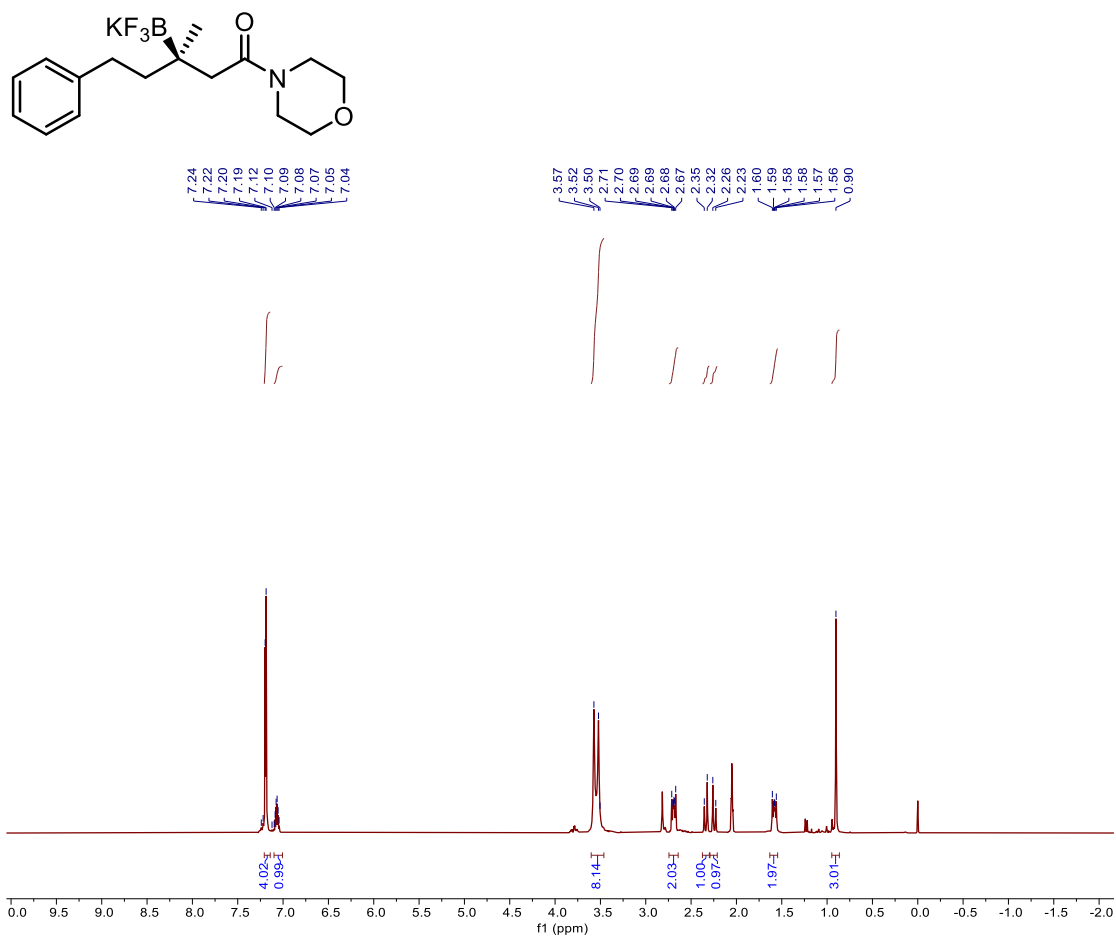

Supplementary Figure 159.  $^1\text{H}$  NMR (400 MHz,  $(\text{CD}_3)_2\text{CO}$ ) of **5**.

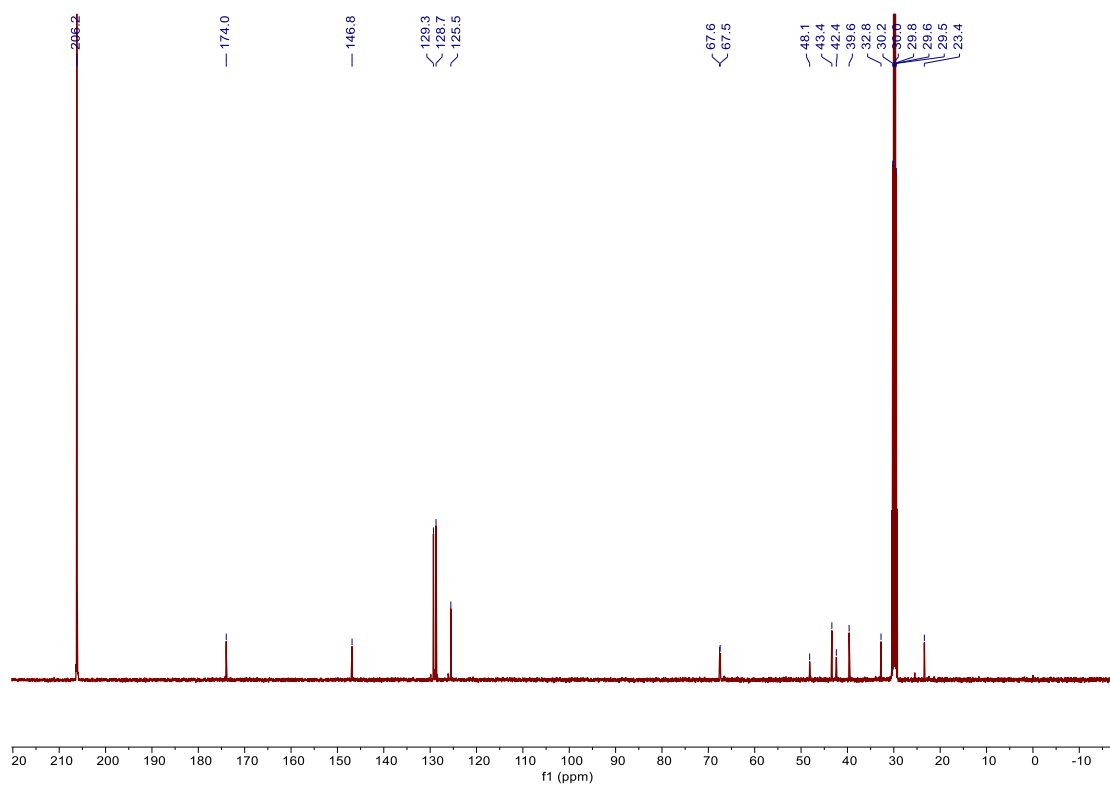

Supplementary Figure 160.  $^{13}\text{C}$  NMR (101 MHz,  $(\text{CD}_3)_2\text{CO}$ ) of **5**.

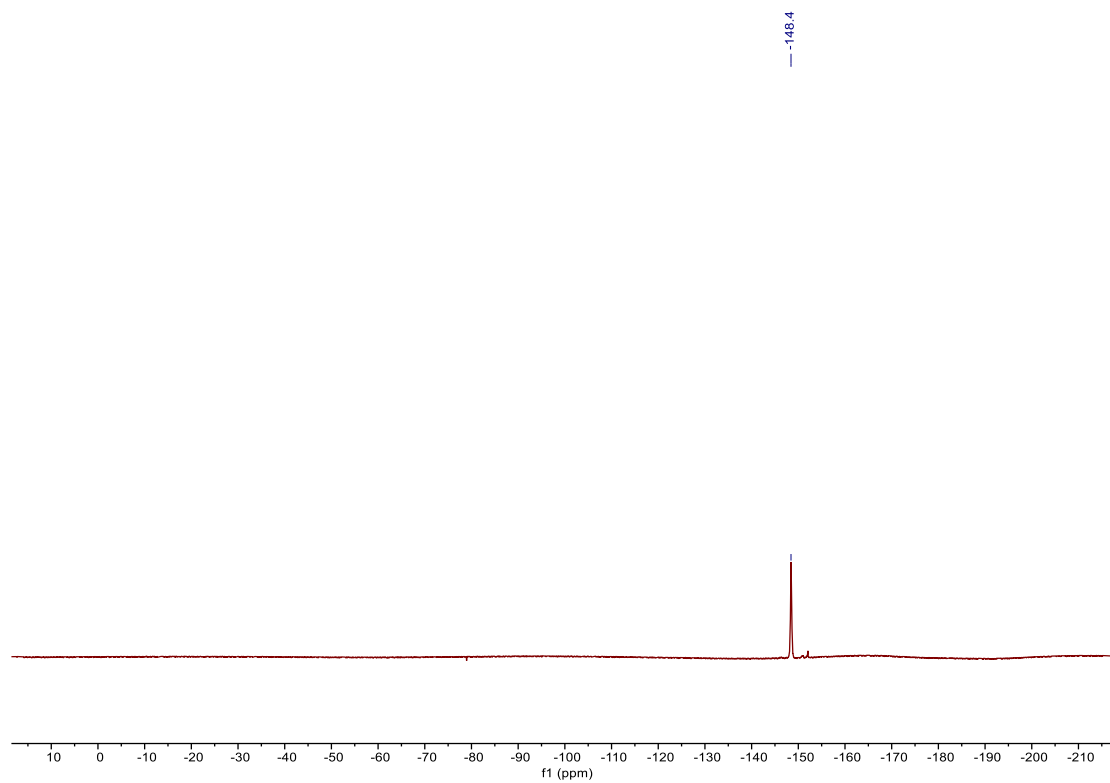

Supplementary Figure 161.  $^{19}\text{F}$  NMR (376 MHz,  $(\text{CD}_3)_2\text{CO}$ ) of **5**.

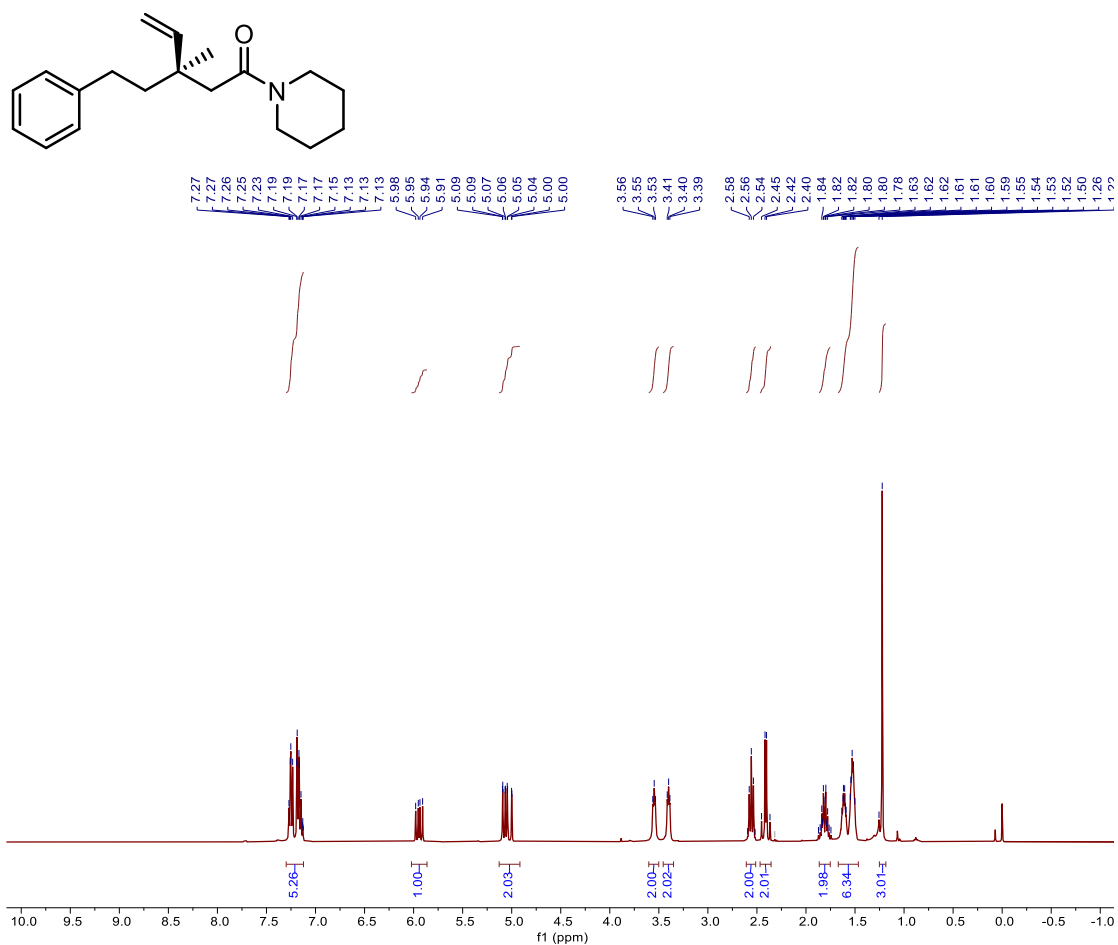

Supplementary Figure 162. <sup>1</sup>H NMR (400 MHz, CDCl<sub>3</sub>) of 6.

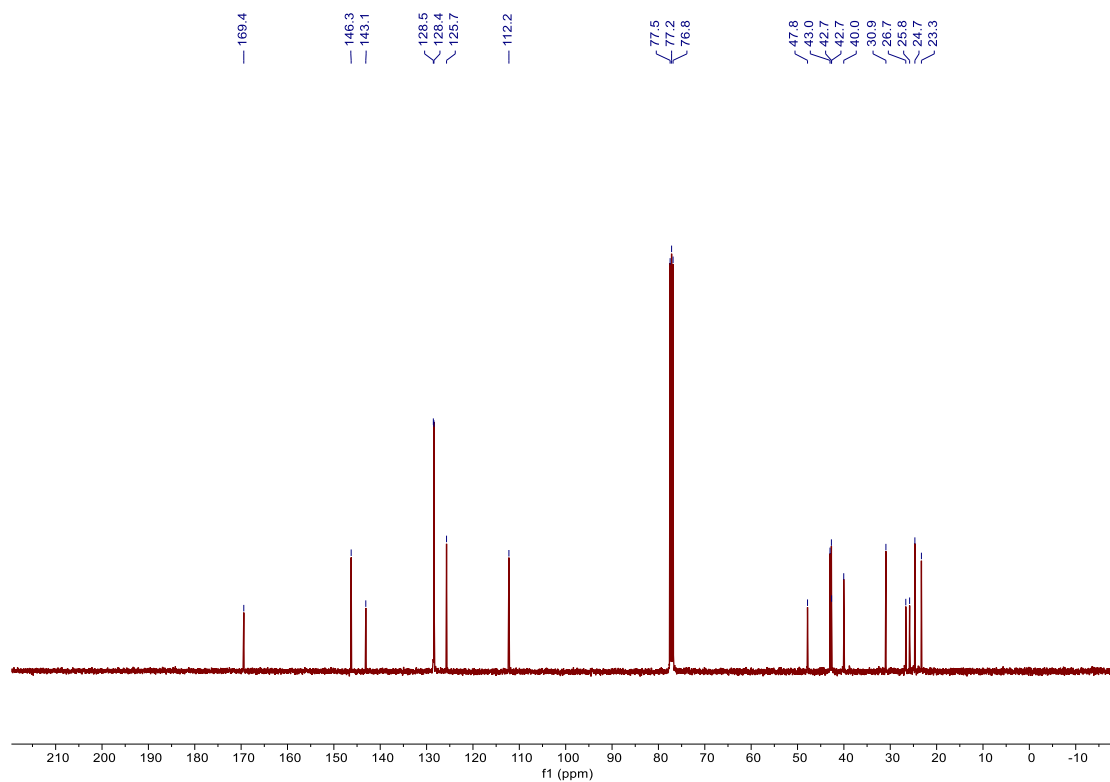

Supplementary Figure 163. <sup>13</sup>C NMR (101 MHz, CDCl<sub>3</sub>) of 6.

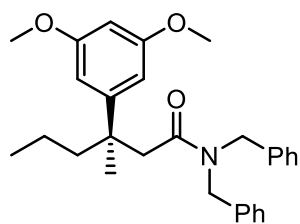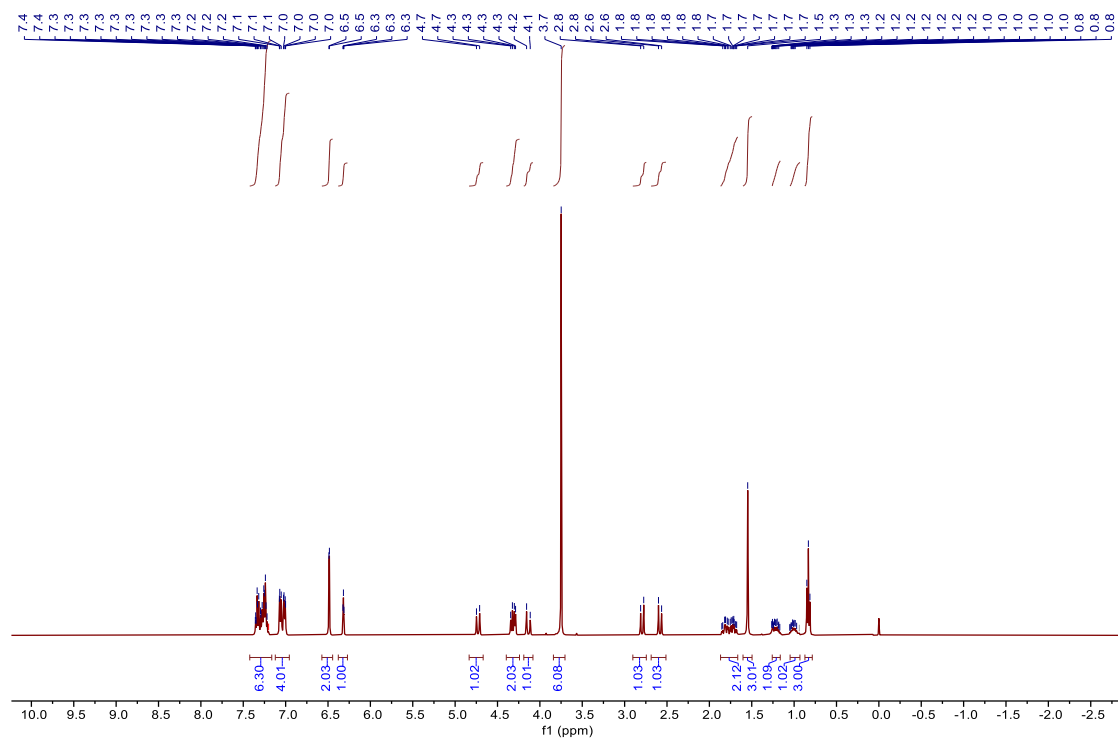

Supplementary Figure 164.  $^1\text{H}$  NMR (400 MHz,  $\text{CDCl}_3$ ) of 7.

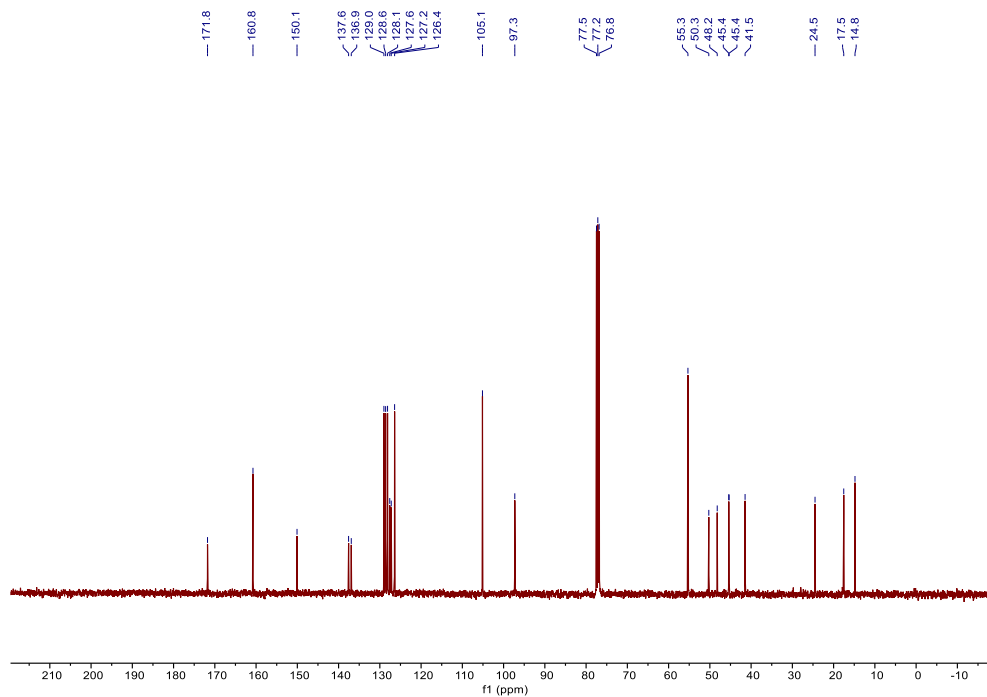

Supplementary Figure 165.  $^{13}\text{C}$  NMR (101 MHz,  $\text{CDCl}_3$ ) of 7.

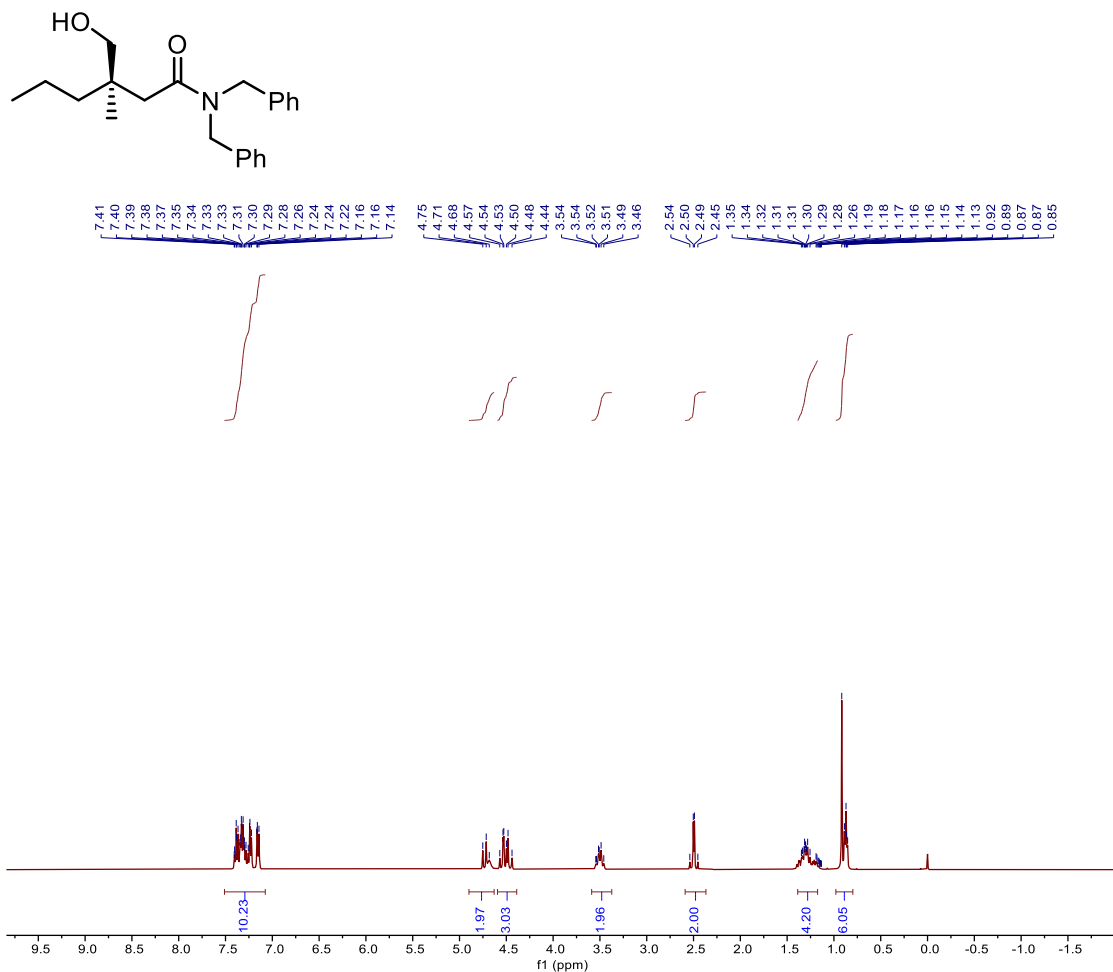

Supplementary Figure 166. <sup>1</sup>H NMR (400 MHz, CDCl<sub>3</sub>) of **8**.

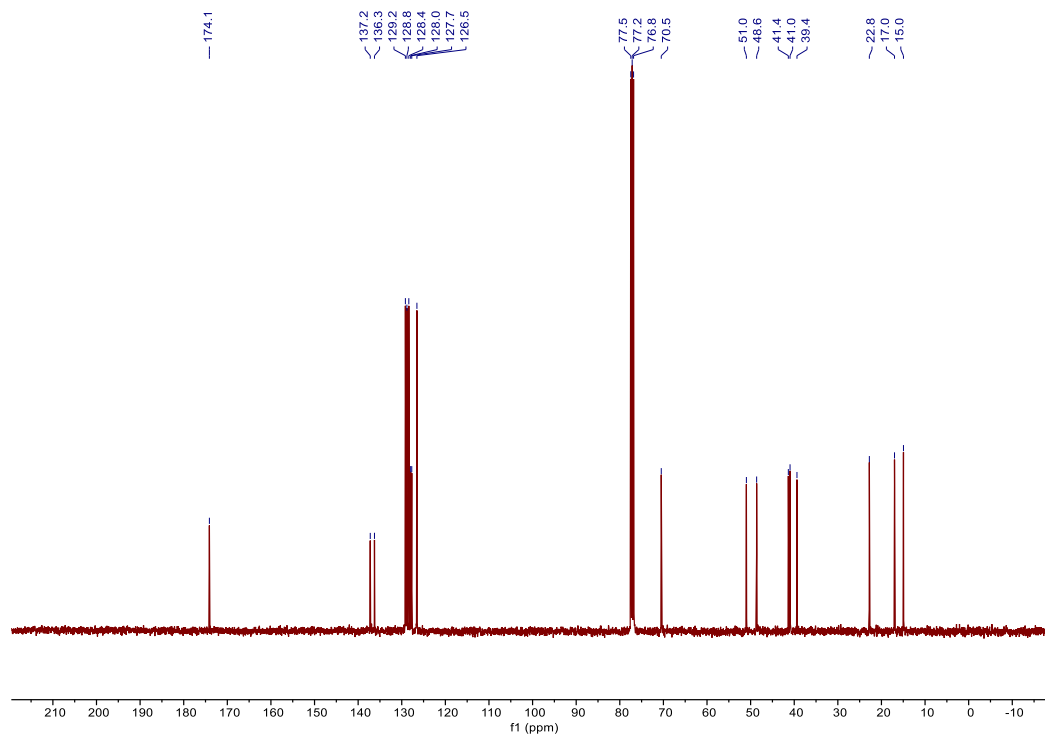

Supplementary Figure 167. <sup>13</sup>C NMR (101 MHz, CDCl<sub>3</sub>) of **8**.

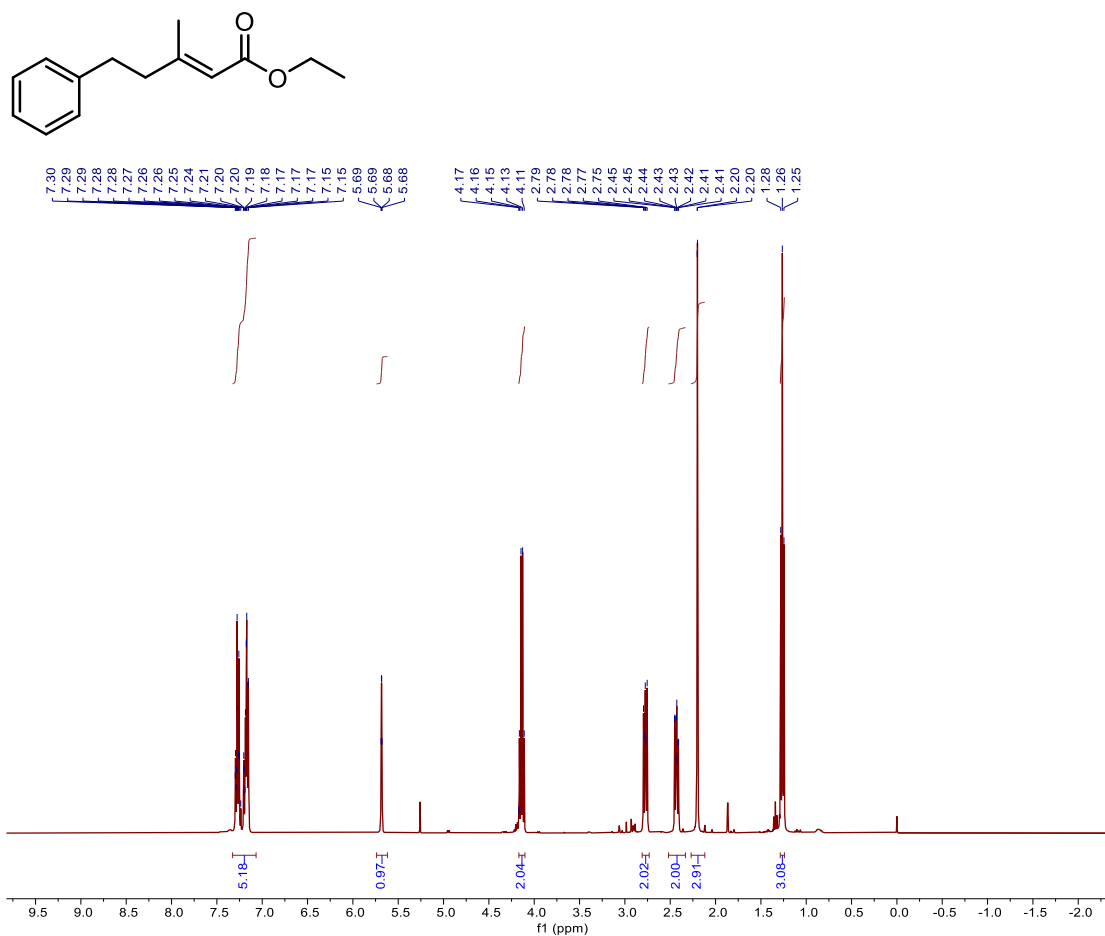

Supplementary Figure 168.  $^1\text{H NMR}$  (400 MHz,  $\text{CDCl}_3$ ) of **9**.

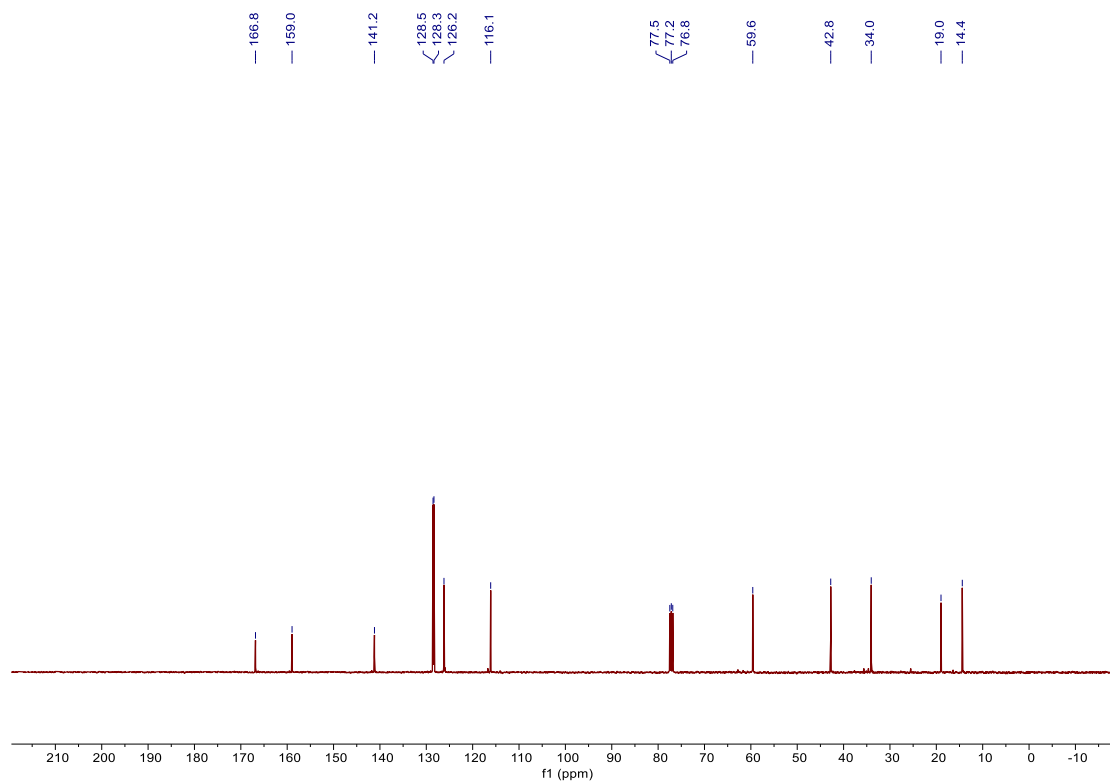

Supplementary Figure 169.  $^{13}\text{C NMR}$  (101 MHz,  $\text{CDCl}_3$ ) of **9**.



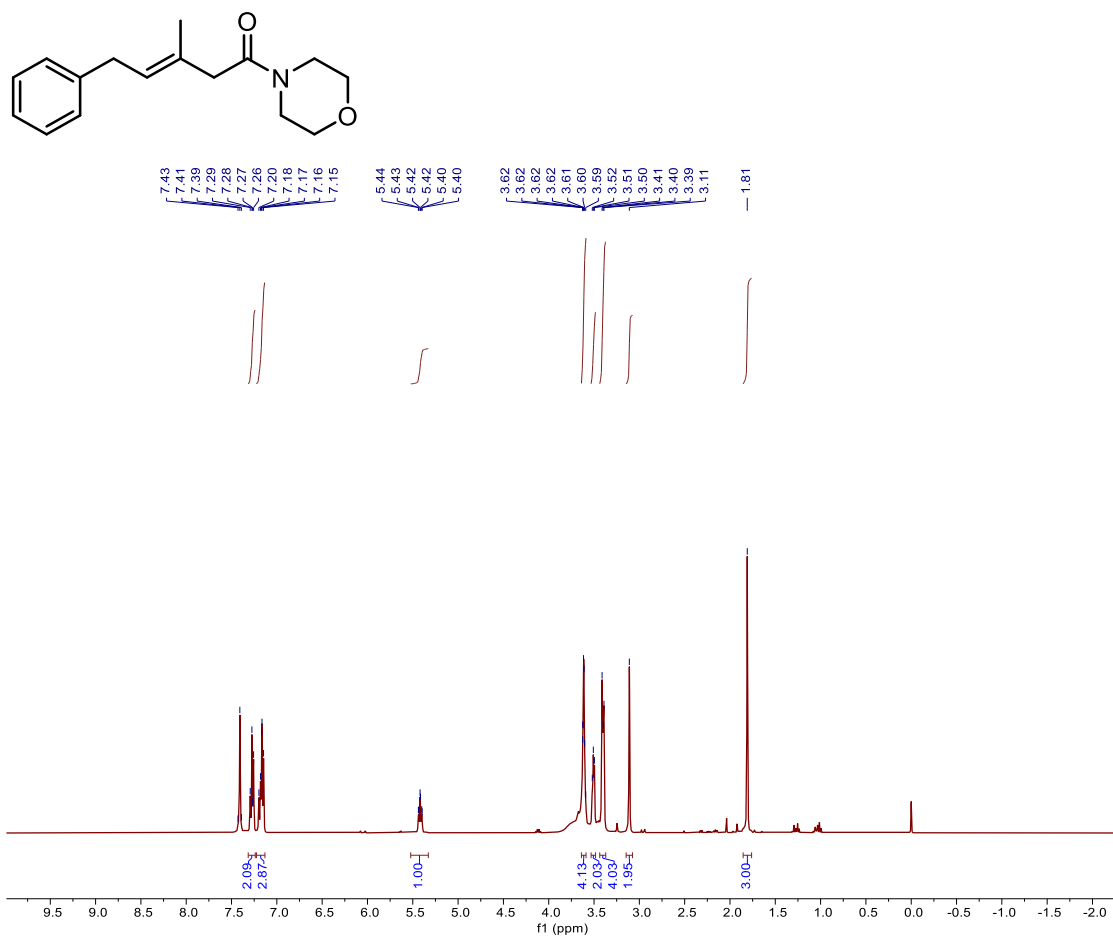

Supplementary Figure 170. <sup>1</sup>H NMR (400 MHz, CDCl<sub>3</sub>) of **10**.

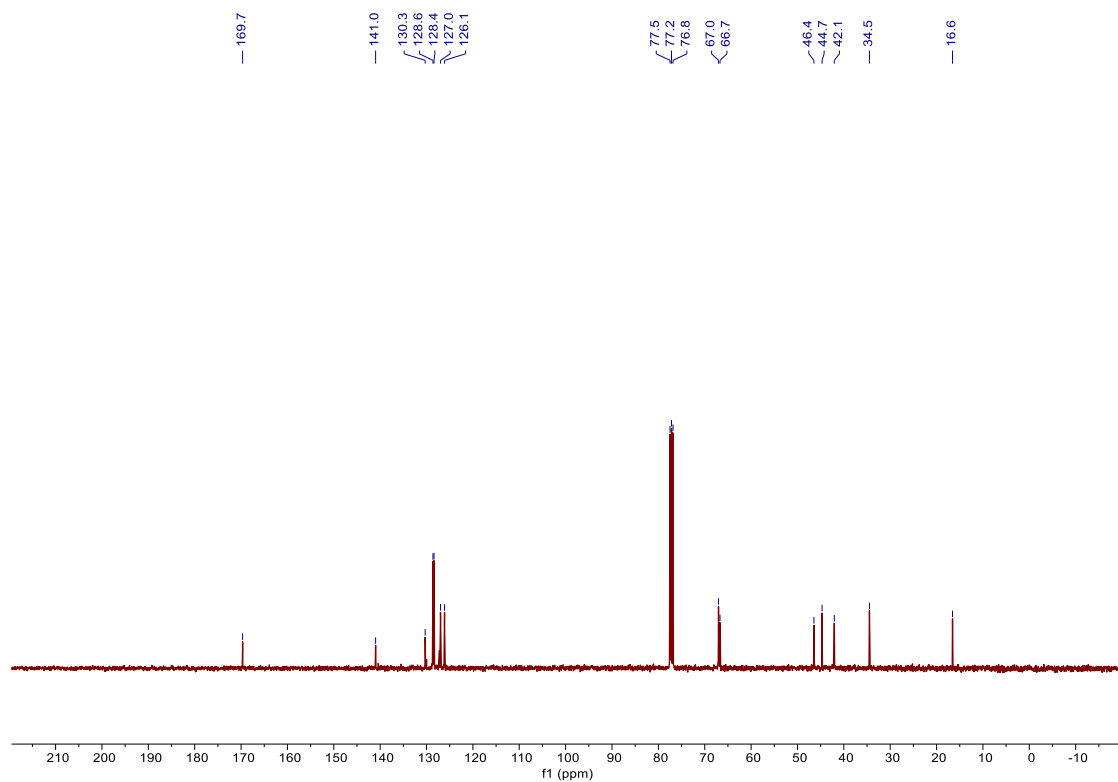

Supplementary Figure 171. <sup>13</sup>C NMR (101 MHz, CDCl<sub>3</sub>) of **10**.

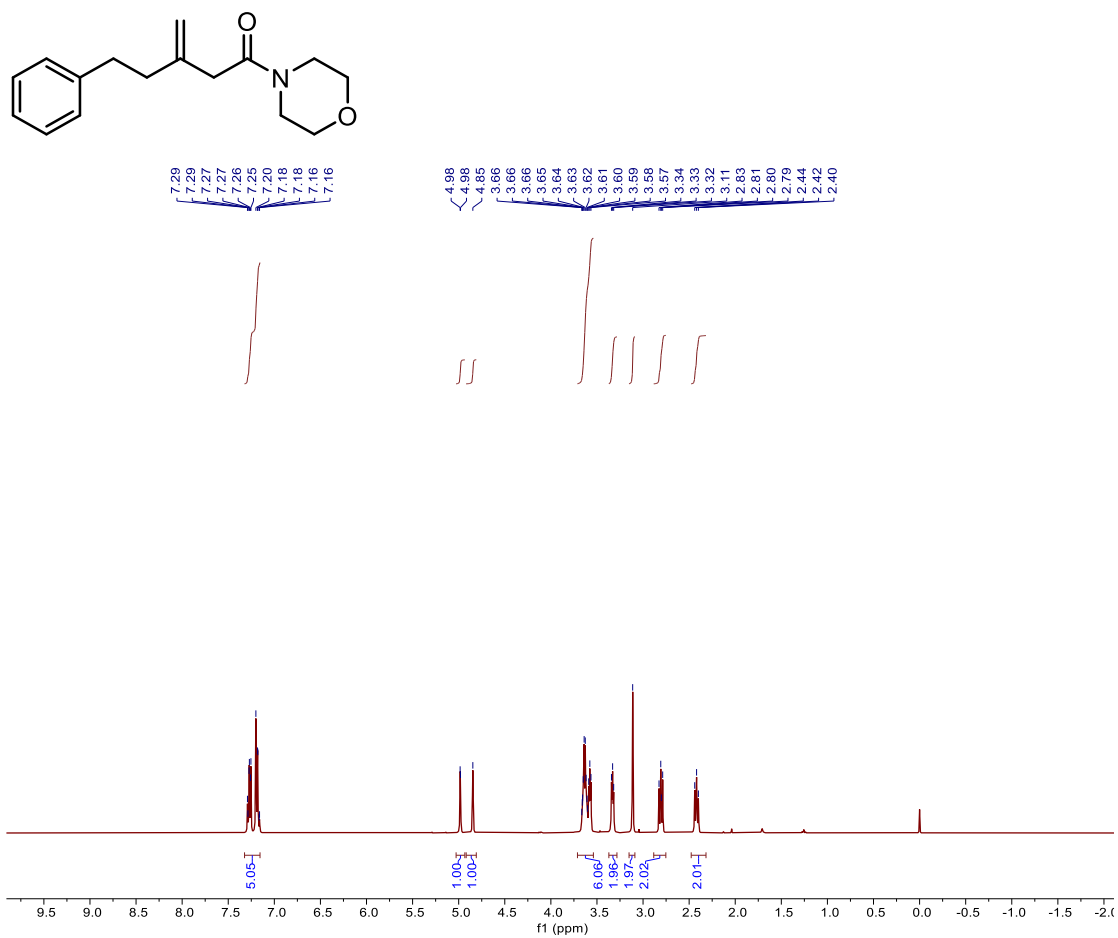

Supplementary Figure 172. <sup>1</sup>H NMR (400 MHz, CDCl<sub>3</sub>) of **11**.

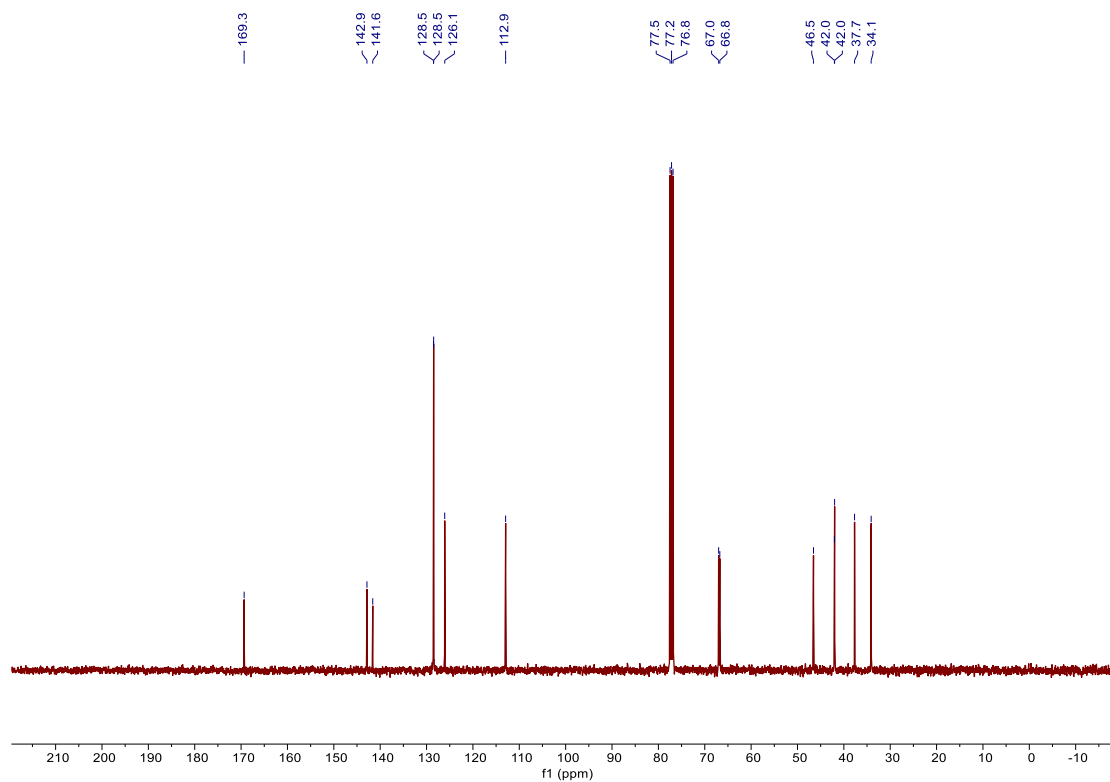

Supplementary Figure 173. <sup>13</sup>C NMR (101 MHz, CDCl<sub>3</sub>) of **11**.

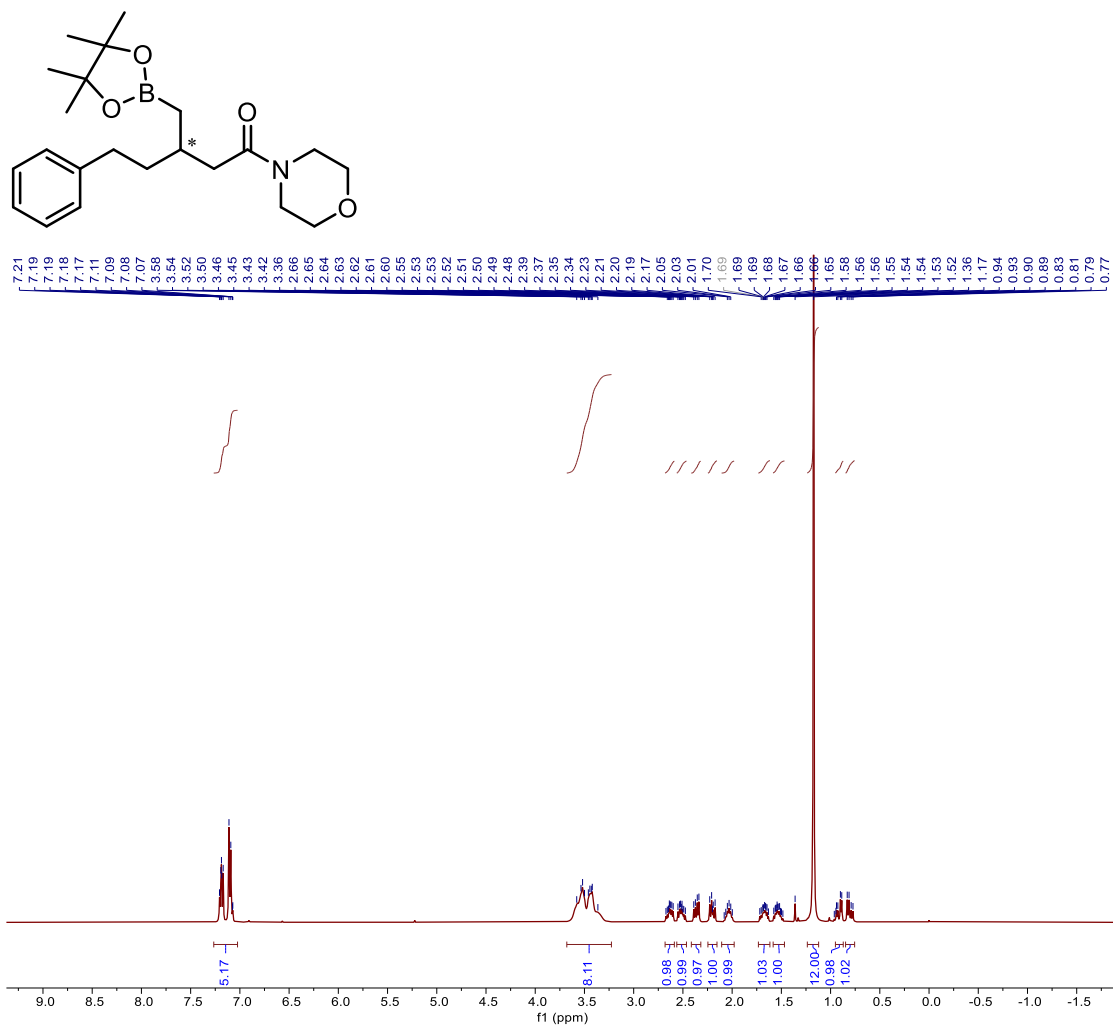

Supplementary Figure 174.  $^1\text{H}$  NMR (400 MHz,  $\text{CDCl}_3$ ) of **11b**.

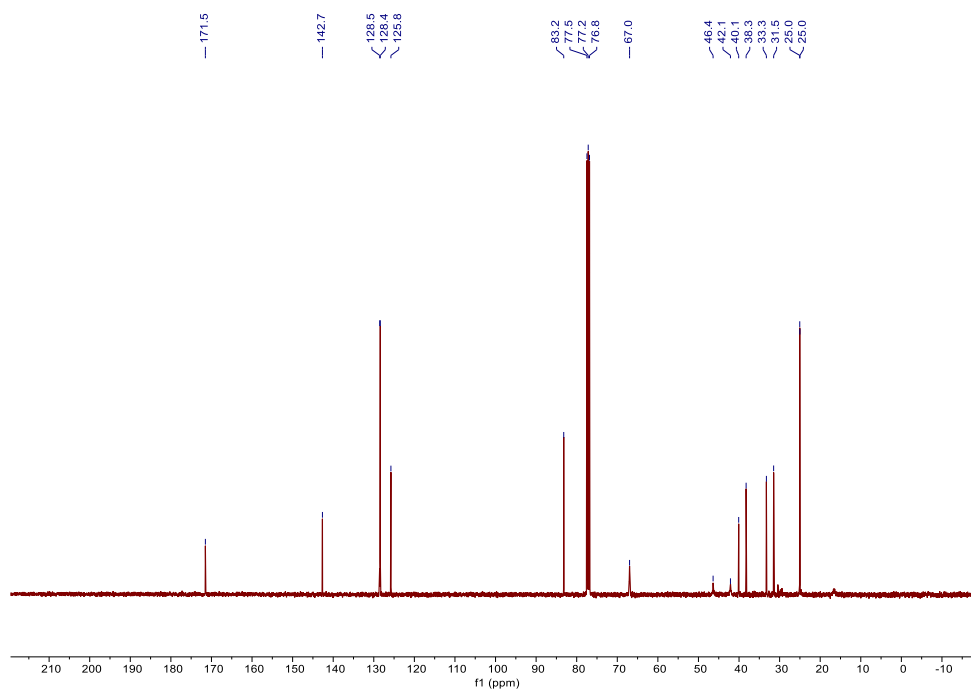

Supplementary Figure 175.  $^{13}\text{C}$  NMR (101 MHz,  $\text{CDCl}_3$ ) of **11b**.

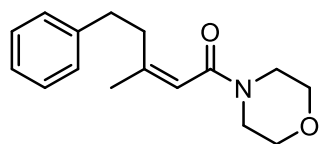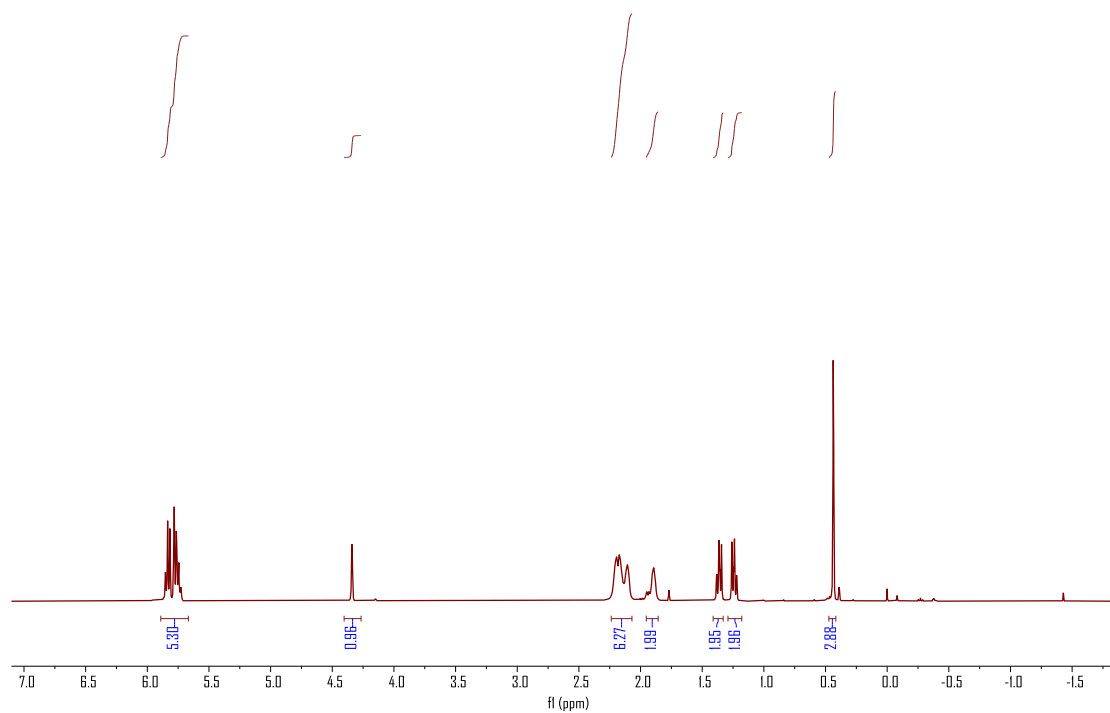

Supplementary Figure 176. <sup>1</sup>H NMR (400 MHz, CDCl<sub>3</sub>) of **Z-1i**.

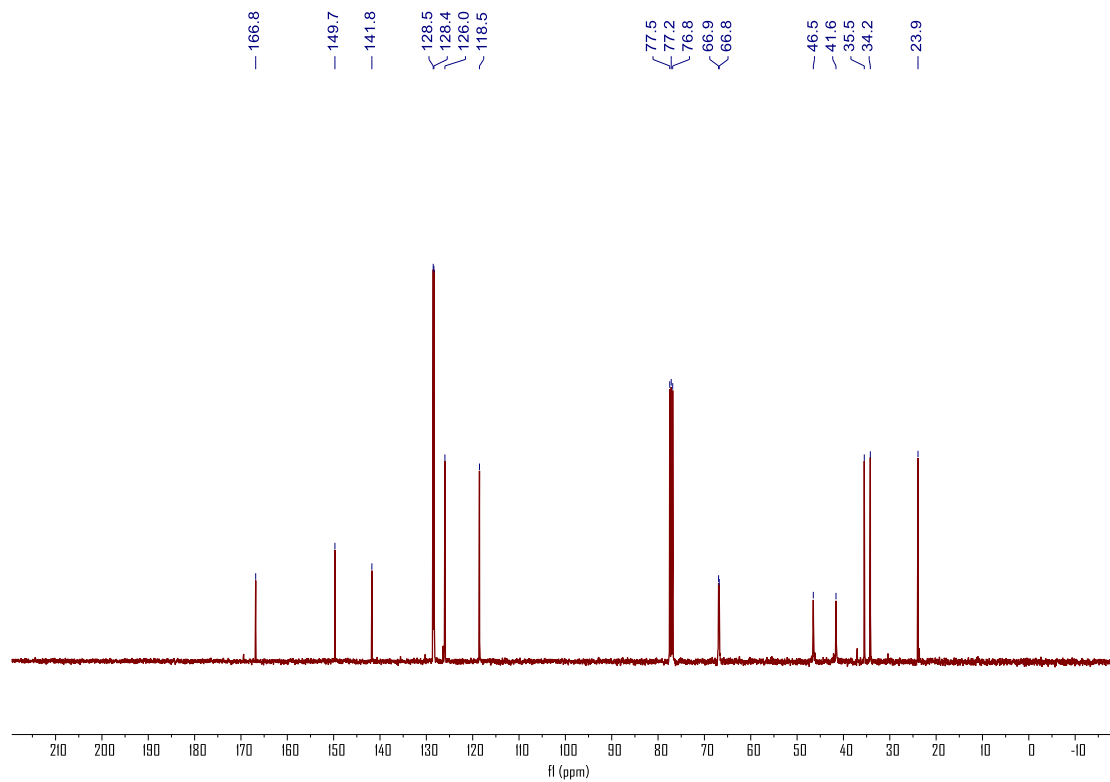

Supplementary Figure 177. <sup>13</sup>C NMR (101 MHz, CDCl<sub>3</sub>) of **Z-1i**.

## Supplementary References

- (1) Tsuchikama, K., Kasagawa, M., Endo, K. & Shibata, T. Cationic Ir(I)-Catalyzed sp<sup>3</sup> C–H Bond Alkenylation of Amides with Alkynes. *Org. Lett.* **11**, 1821-1823 (2009).
- (2) Lee, J.-E. & Yun, J. Catalytic Asymmetric Boration of Acyclic  $\alpha,\beta$ -Unsaturated Esters and Nitriles. *Angew. Chem., Int. Ed.* **47**, 145-147 (2008).
- (3) Liu, Z., Ni, H. Q., Zeng, T. & Engle, K. M. Catalytic Carbo- and Aminoboration of Alkenyl Carbonyl Compounds via Five- and Six-Membered Palladacycles. *J. Am. Chem. Soc.* **140**, 3223-3227 (2018).
- (4) Hoang, G. L. & Takacs, J. M. Enantioselective gamma-borylation of unsaturated amides and stereoretentive Suzuki-Miyaura cross-coupling. *Chem. Sci.* **8**, 4511-4516 (2017).
- (5) Bonet, A., Odachowski, M., Leonori, D., Essafi, S. & Aggarwal, V. K. Enantiospecific sp<sup>2</sup>–sp<sup>3</sup> coupling of secondary and tertiary boronic esters. *Nat. Chem.* **6**, 584-589 (2014).
- (6) Sonawane, R. P. et al. Enantioselective Construction of Quaternary Stereogenic Centers from Tertiary Boronic Esters: Methodology and Applications. *Angew. Chem., Int. Ed.* **50**, 3760-3763 (2011).
